# Supplementary material for: Structure and function of the Arctic and Antarctic marine microbiota as revealed by metagenomics
Source: Microbiome. 2020 Apr 2;8:47. doi: 10.1186/s40168-020-00826-9 (PMC7119284; doi:10.1186/s40168-020-00826-9)
Supplement: Supplementary file 3 — Additional file 2: Table S1. Sampling locations and metagenomes information. [file 40168_2020_826_MOESM2_ESM.xlsx]

## Sheet: Sheet1
Table S1 Sampling locations and metagenome information.
Samples collected in the present study.
Group	Sample	Depth (m)	Longtitude	Latitude	Raw reads (*2)	Clean reads (*2)	Clean reads (%)
Arctic-Surface	AT04-0m-8Ar	0	4.01	70.2	48610059	45422598	93.44
Arctic-Surface	B08-0m-8Ar	0	176.4	58.1	51524688	48720057	94.56
Arctic-Surface	BB08-0m-8Ar	0	2.34	74.33	36080508	33863834	93.86
Arctic-Surface	G02-7Ar	0	142.96	75.77	58039192	54699680	94.25
Arctic-Surface	ICE04-0m-9Ar	0	168.01	82.05	37506208	35362884	94.29
Arctic-Surface	K3-8Ar	0	12	78.95	46336125	44239030	95.47
Arctic-Surface	N02-0m-8Ar	0	179.55	80.03	47773905	45943085	96.17
Arctic-Surface	N04-0m-8Ar	0	111.08	84.6	42910633	39010811	90.91
Arctic-Surface	N07-0m-8Ar	0	43.08	85.02	59187547	55475021	93.73
Arctic-Surface	P06-0m-8Ar	0	-151.19	75	51177719	46664730	91.18
Arctic-Surface	UW012-0m-8Ar	0	169.45	52.76	37170356	34272932	92.21
Arctic-Surface	UW022-8Ar	0	-121.22	70.21	53900208	51668724	95.86
Arctic-Surface	UW023-8Ar	0	-72.46	72.23	47890977	45718238	95.46
Arctic-Surface	UW024-9Ar	0	-159.86	74.99	37600797	34764433	92.46
Arctic-Surface	LB01-5m-8Ar	5	-46.99	56.33	47450354	44510802	93.8
Arctic-Surface	ICE04-100m-9Ar	100	168.01	82.05	34699276	32824604	94.6
Arctic-Deep	AT04-300m-8Ar	300	4.01	70.2	33956480	32142197	94.66
Arctic-Deep	BB08-300m-8Ar	300	2.34	74.33	33628317	31026936	92.26
Arctic-Deep	LB01-300m-8Ar	300	-46.99	56.33	46070880	42898404	93.11
Arctic-Deep	N04-300m-8Ar	300	111.08	84.6	53259768	49191670	92.36
Arctic-Deep	N07-300m-8Ar	300	43.08	85.02	62248376	57832461	92.91
Arctic-Deep	P06-300m-8Ar	300	-151.19	75	44376253	41359282	93.2
Arctic-Deep	R16E-300m-9Ar	300	161.52	80	38711636	37088545	95.81
Arctic-Deep	N02-500m-8Ar	500	179.55	80.03	41293201	37464220	90.73
Arctic-Deep	AT04-1000m-8Ar	1000	4.01	70.2	39439197	37268009	94.49
Arctic-Deep	B08-1000m-8Ar	1000	176.4	58.1	52627696	49709576	94.46
Arctic-Deep	BB08-1000m-8Ar	1000	2.34	74.33	34669883	32361300	93.34
Arctic-Deep	ICE04-1000m-9Ar	1000	168.01	82.05	35720565	33902615	94.91
Arctic-Deep	LB01-1000m-8Ar	1000	-46.99	56.33	43596354	39227147	89.98
Arctic-Deep	N07-1000m-8Ar	1000	43.08	85.02	74473431	68526798	92.02
Arctic-Deep	R16E-1000m-9Ar	1000	161.52	80	38247349	36013179	94.16
Arctic-Deep	N02-1500m-8Ar	1500	179.55	80.03	48784723	46082830	94.46
Arctic-Deep	ICE04-2280m-9Ar	2280	168.01	82.05	41507118	39952327	96.25
Arctic-Deep	AT04-3000m-8Ar	3000	4.01	70.2	43427742	41019188	94.45
Arctic-Deep	B08-3200m-8Ar	3200	176.4	58.1	56855335	54635132	96.09
Arctic-Deep	R16E-3236m-9Ar	3236	161.52	80	35181958	32447928	92.23
Arctic-Deep	BB08-3300m-8Ar	3300	2.34	74.33	33871156	31441380	92.83
Arctic-Deep	N04-3800m-8Ar	3800	111.08	84.6	52678109	50654730	96.16
Arctic-Deep	N07-3800m-8Ar	3800	43.08	85.02	77544374	71600151	92.33
Antarctic-Surface	A3-09-0m-34An	0	-120	-68.01	68008708	66581654	97.9
Antarctic-Surface	A4-07-0m-34An	0	-115.24	-69.94	40890497	38928038	95.2
Antarctic-Surface	A5-10-0m-34An	0	-110	-67.02	60576047	58965116	97.34
Antarctic-Surface	UW042-0m-34An	0	-160.08	-70	51727578	50690516	98
Antarctic-Surface	UW044-0m-34An	0	-169	-70.75	70412913	68816071	97.73
Antarctic-Surface	UW048-33An	0	-89.29	-67.77	55978045	52566267	93.91
Antarctic-Surface	UW050-0m-34An	0	-176.62	-58.03	47375509	46475440	98.1
Antarctic-Surface	UW051-33An	0	-112.73	-70.05	58231065	53908231	92.58
Antarctic-Surface	UW056-33An	0	173.02	-76.96	57636589	53916468	93.55
Antarctic-Surface	UW064-33An	0	125.22	-64.35	52569045	49728562	94.6
Antarctic-Surface	UW072-33An	0	70.56	-66.58	52979393	48936346	92.37
Antarctic-Surface	UW073-33An	0	73.61	-60.01	59432429	56271765	94.68
Antarctic-Deep	A3-09-300m-34An	300	-120	-68.01	49722298	48041762	96.62
Antarctic-Deep	A4-07-300m-34An	300	-115.24	-69.94	37827742	35217812	93.1
Antarctic-Deep	A5-10-300m-34An	300	-110	-67.02	40979231	38936739	95.02
Antarctic-Deep	A3-09-1000m-34An	1000	-120	-68.01	39907736	38013665	95.25
Antarctic-Deep	A4-07-1000m-34An	1000	-115.24	-69.94	41869527	39203019	93.63
Antarctic-Deep	A5-10-1000m-34An	1000	-110	-67.02	50335577	48407349	96.17
Antarctic-Deep	A4-07-3000m-34An	3000	-115.24	-69.94	40749846	38324748	94.05
Antarctic-Deep	A3-09-3500m-34An	3500	-120	-68.01	46618494	44654207	95.79
Antarctic-Deep	A5-10-3500m-34An	3500	-110	-67.02	49438015	47839273	96.77
Samples downloaded from the Tara Oceans project.
Group	Sample	Depth (m)	Longtitude	Latitude	Accession
Tara-Surface	ERR315857	5	1.9378	37.051	http://www.pangaea.de/search?All&q=TARA_A200000113
Tara-Surface	ERR315858	5	17.715	42.2038	http://www.pangaea.de/search?All&q=TARA_E500000075
Tara-Surface	ERR315862	5	32.898	33.9179	http://www.pangaea.de/search?All&q=TARA_A100001015
Tara-Surface	ERR594286	0	-35.1803	5	http://www.pangaea.de/search?All&q=TARA_Y100000813
Tara-Surface	ERR594288	5	5.916	39.1633	http://www.pangaea.de/search?All&q=TARA_X000000950
Tara-Surface	ERR594297	5	4.665	-31.0266	http://www.pangaea.de/search?All&q=TARA_Y100000739
Tara-Surface	ERR594307	5	-139.196	-8.9971	http://www.pangaea.de/search?All&q=TARA_Y100001980
Tara-Surface	ERR594310	5	-35.1803	-20.9354	http://www.pangaea.de/search?All&q=TARA_Y100000816
Tara-Surface	ERR594318	5	4.665	-31.0266	http://www.pangaea.de/search?All&q=TARA_Y100000741
Tara-Surface	ERR594325	5	17.7103	-32.2401	http://www.pangaea.de/search?All&q=TARA_Y100000385
Tara-Surface	ERR594332	5	-43.2899	-30.1367	http://www.pangaea.de/search?All&q=TARA_Y100000991
Tara-Surface	ERR594335	5	-3.1759	-20.4091	http://www.pangaea.de/search?All&q=TARA_Y100000766
Tara-Surface	ERR594340	5	-43.2899	-30.1367	http://www.pangaea.de/search?All&q=TARA_Y100000992
Tara-Surface	ERR594349	5	-3.1759	-20.4091	http://www.pangaea.de/search?All&q=TARA_Y100000768
Tara-Surface	ERR598954	5	-129.395	-23.2811	http://www.pangaea.de/search?All&q=TARA_B100000941
Tara-Surface	ERR598955	5	-6.5669	36.5533	http://www.pangaea.de/search?All&q=TARA_Y200000002
Tara-Surface	ERR598963	5	-49.9181	34.1132	http://www.pangaea.de/search?All&q=TARA_B100001758
Tara-Surface	ERR598966	5	63.5047	20.8183	http://www.pangaea.de/search?All&q=TARA_Y100000022
Tara-Surface	ERR598967	5	-101.16	-29.7238	http://www.pangaea.de/search?All&q=TARA_B100000989
Tara-Surface	ERR598968	5	-71.3093	34.6712	http://www.pangaea.de/search?All&q=TARA_B100001540
Tara-Surface	ERR598970	5	37.9889	-29.5019	http://www.pangaea.de/search?All&q=TARA_B100000401
Tara-Surface	ERR598976	5	-29.023	36.1715	http://www.pangaea.de/search?All&q=TARA_B100001564
Tara-Surface	ERR598979	5	26.2868	-35.1728	http://www.pangaea.de/search?All&q=TARA_B000000437
Tara-Surface	ERR598983	5	-70.0377	39.2305	http://www.pangaea.de/search?All&q=TARA_B100001142
Tara-Surface	ERR598984	5	-17.9099	-8.7789	http://www.pangaea.de/search?All&q=TARA_B100000424
Tara-Surface	ERR598989	5	-116.626	14.2035	http://www.pangaea.de/search?All&q=TARA_B100001287
Tara-Surface	ERR598991	5	39.875	18.3967	http://www.pangaea.de/search?All&q=TARA_B100000003
Tara-Surface	ERR598993	5	14.2574	35.759	http://www.pangaea.de/search?All&q=TARA_A100000164
Tara-Surface	ERR599006	5	-43.2899	-30.1367	http://www.pangaea.de/search?All&q=TARA_B100000524
Tara-Surface	ERR599011	5	69.9776	14.6059	http://www.pangaea.de/search?All&q=TARA_B100000282
Tara-Surface	ERR599012	5	40.3412	-22.3368	http://www.pangaea.de/search?All&q=TARA_B000000532
Tara-Surface	ERR599019	5	66.4228	-9.3921	http://www.pangaea.de/search?All&q=TARA_B100000242
Tara-Surface	ERR599024	5	-104.787	-21.146	http://www.pangaea.de/search?All&q=TARA_B100000886
Tara-Surface	ERR599029	5	-80.0454	9.8481	http://www.pangaea.de/search?All&q=TARA_B100001939
Tara-Surface	ERR599030	5	-102.943	6.3332	http://www.pangaea.de/search?All&q=TARA_B100001989
Tara-Surface	ERR599039	5	-84.589	-2.0133	http://www.pangaea.de/search?All&q=TARA_B100001109
Tara-Surface	ERR599043	5	19.3905	39.3888	http://www.pangaea.de/search?All&q=TARA_E500000178
Tara-Surface	ERR599045	5	71.6428	0.0033	http://www.pangaea.de/search?All&q=TARA_B100000161
Tara-Surface	ERR599050	5	-87.0693	-32.7971	http://www.pangaea.de/search?All&q=TARA_B100001057
Tara-Surface	ERR599057	5	43.2965	-15.3424	http://www.pangaea.de/search?All&q=TARA_B000000609
Tara-Surface	ERR599058	5	42.7401	-17.0248	http://www.pangaea.de/search?All&q=TARA_B000000565
Tara-Surface	ERR599063	5	-95.9759	-13.0023	http://www.pangaea.de/search?All&q=TARA_B100000963
Tara-Surface	ERR599064	5	-73.1066	-34.0614	http://www.pangaea.de/search?All&q=TARA_B100001063
Tara-Surface	ERR599075	5	73.8955	6.0001	http://www.pangaea.de/search?All&q=TARA_B100000123
Tara-Surface	ERR599077	5	-100.633	-16.9601	http://www.pangaea.de/search?All&q=TARA_B100000575
Tara-Surface	ERR599078	5	-16.8344	43.6792	http://www.pangaea.de/search?All&q=TARA_B100001173
Tara-Surface	ERR599093	5	-111.72	-25.8051	http://www.pangaea.de/search?All&q=TARA_B100001027
Tara-Surface	ERR599098	5	53.9801	-16.957	http://www.pangaea.de/search?All&q=TARA_B100000212
Tara-Surface	ERR599102	5	64.4913	19.0393	http://www.pangaea.de/search?All&q=TARA_Y100000287
Tara-Surface	ERR599123	5	-64.2489	31.6948	http://www.pangaea.de/search?All&q=TARA_B100001741
Tara-Surface	ERR599126	5	-35.1803	-20.9354	http://www.pangaea.de/search?All&q=TARA_B100000513
Tara-Surface	ERR599136	5	-88.394	25.5264	http://www.pangaea.de/search?All&q=TARA_B100002051
Tara-Surface	ERR599165	5	-3.1759	-20.4091	http://www.pangaea.de/search?All&q=TARA_B100000459
Tara-Surface	ERR599170	5	-37.3032	35.9346	http://www.pangaea.de/search?All&q=TARA_B100001769
Tara-Surface	ERR599174	5	4.665	-31.0266	http://www.pangaea.de/search?All&q=TARA_B100000475
Tara-Deep	ERR594284	115	-139.139	-9.0063	http://www.pangaea.de/search?All&q=TARA_Y100001973
Tara-Deep	ERR594290	600	63.5851	20.8457	http://www.pangaea.de/search?All&q=TARA_Y100000310
Tara-Deep	ERR594298	150	-35.3498	-21.0292	http://www.pangaea.de/search?All&q=TARA_Y100000814
Tara-Deep	ERR594300	140	-142.546	-8.8999	http://www.pangaea.de/search?All&q=TARA_Y100000589
Tara-Deep	ERR594301	115	-139.139	-9.0063	http://www.pangaea.de/search?All&q=TARA_Y100001968
Tara-Deep	ERR594302	700	4.6685	-31.0198	http://www.pangaea.de/search?All&q=TARA_Y100000758
Tara-Deep	ERR594303	120	-43.2705	-30.1484	http://www.pangaea.de/search?All&q=TARA_Y100000994
Tara-Deep	ERR594304	115	-139.139	-9.0063	http://www.pangaea.de/search?All&q=TARA_Y100001970
Tara-Deep	ERR594305	600	-139.239	-8.9729	http://www.pangaea.de/search?All&q=TARA_Y100001949
Tara-Deep	ERR594319	150	-140.285	-8.9109	http://www.pangaea.de/search?All&q=TARA_Y100001956
Tara-Deep	ERR594331	800	-3.1641	-20.4075	http://www.pangaea.de/search?All&q=TARA_Y100000780
Tara-Deep	ERR594333	800	-35.1794	-20.9315	http://www.pangaea.de/search?All&q=TARA_Y100000815
Tara-Deep	ERR594337	150	-140.285	-8.9109	http://www.pangaea.de/search?All&q=TARA_Y100001960
Tara-Deep	ERR594346	270	66.3896	18.7341	http://www.pangaea.de/search?All&q=TARA_Y100000034
Tara-Deep	ERR598980	550	31.528	-159.022	http://www.pangaea.de/search?All&q=TARA_B100001245
Tara-Deep	ERR599021	1000	37.9599	-29.5046	http://www.pangaea.de/search?All&q=TARA_B100000408
Tara-Deep	ERR599037	270	66.3896	18.7341	http://www.pangaea.de/search?All&q=TARA_Y100000031
Tara-Deep	ERR599112	1000	43.2948	-15.3379	http://www.pangaea.de/search?All&q=TARA_B100000378
Tara-Deep	ERR599115	650	-127.727	35.2698	http://www.pangaea.de/search?All&q=TARA_B100001105
