# Supplementary material for: Structure and function of the Arctic and Antarctic marine microbiota as revealed by metagenomics
Source: Microbiome. 2020 Apr 2;8:47. doi: 10.1186/s40168-020-00826-9 (PMC7119284; doi:10.1186/s40168-020-00826-9)
Supplement: Supplementary file 4 — Additional file 3: Table S2. Information of the assembled contigs. [file 40168_2020_826_MOESM3_ESM.xlsx]

## Sheet: Sheet1
Table S2 Information of the assembled contigs.
Group	Sample	Total length (bp)	Total number	N25 of contigs	N50 of contigs	N75 of contigs	GC%	# of ORFs
Arctic-Surface	AT04-0m-8Ar	828048459	846411	6691	1336	597	52.1	1499799
Arctic-Surface	B08-0m-8Ar	681832210	818197	3444	1014	510	41.41	1313692
Arctic-Surface	BB08-0m-8Ar	729253138	799887	4925	1170	557	52.26	1336721
Arctic-Surface	G02-7Ar	888005370	1046040	3338	993	531	45.91	1534754
Arctic-Surface	ICE04-0m-9Ar	627953322	731710	3211	1044	542	39.98	1170001
Arctic-Surface	K3-8Ar	591956696	693007	3737	1046	520	46.63	970010
Arctic-Surface	N02-0m-8Ar	745134585	924345	2451	935	515	42.95	1460830
Arctic-Surface	N04-0m-8Ar	799163570	907932	3476	1122	550	45.05	1475948
Arctic-Surface	N07-0m-8Ar	604938399	743023	2786	951	513	40.41	1143449
Arctic-Surface	P06-0m-8Ar	546293233	653611	3433	1011	513	42.47	939815
Arctic-Surface	UW012-0m-8Ar	573875517	732198	2398	895	500	41.57	1083249
Arctic-Surface	UW022-8Ar	833062260	891699	5508	1243	561	52.92	1454406
Arctic-Surface	UW023-8Ar	755819525	777816	5148	1376	590	52.05	1300482
Arctic-Surface	UW024-9Ar	765347153	816791	4125	1197	592	41.36	1408394
Arctic-Surface	LB01-5m-8Ar	560902819	694503	2906	902	508	39.09	1107400
Arctic-Surface	ICE04-100m-9Ar	667305475	882573	2084	555	485	42.43	1330319
Arctic-Deep	AT04-300m-8Ar	754847967	927009	2528	940	522	45.08	1507009
Arctic-Deep	BB08-300m-8Ar	607332684	789633	2137	860	496	44.29	1131513
Arctic-Deep	LB01-300m-8Ar	757177957	953028	2714	879	499	48.05	1500748
Arctic-Deep	N04-300m-8Ar	944920635	983059	5802	1438	584	55.17	1683316
Arctic-Deep	N07-300m-8Ar	853058477	1122193	2131	855	487	4645	1699108
Arctic-Deep	P06-300m-8Ar	831782057	1048493	2566	911	500	49.18	1576461
Arctic-Deep	R16E-300m-9Ar	753940197	979676	2067	870	501	45.06	1470688
Arctic-Deep	N02-500m-8Ar	864093966	1121093	2302	878	488	47.86	1713551
Arctic-Deep	AT04-1000m-8Ar	463387629	512748	4041	1130	564	43.31	842273
Arctic-Deep	B08-1000m-8Ar	753006614	868764	3826	1078	534	45.18	1415417
Arctic-Deep	BB08-1000m-8Ar	372101537	376796	6831	1370	605	45.9	663551
Arctic-Deep	ICE04-1000m-9Ar	650491606	875565	2009	821	475	43.2	1297216
Arctic-Deep	LB01-1000m-8Ar	616654962	621013	8294	1393	594	51.69	1086621
Arctic-Deep	N07-1000m-8Ar	999754435	1237488	2910	950	502	49.23	1934509
Arctic-Deep	R16E-1000m-9Ar	730770754	863495	3304	1004	529	48.14	1367181
Arctic-Deep	N02-1500m-8Ar	978993867	974323	5742	1492	619	53.87	1661850
Arctic-Deep	ICE04-2280m-9Ar	674284933	867487	2153	879	503	40.71	1361192
Arctic-Deep	AT04-3000m-8Ar	849052821	1101445	2025	864	505	40.31	1727107
Arctic-Deep	B08-3200m-8Ar	1091594757	1165975	5121	1209	571	55.3	1946404
Arctic-Deep	R16E-3236m-9Ar	697664325	721245	7040	1276	586	51.91	1183915
Arctic-Deep	BB08-3300m-8Ar	747744646	877924	2996	1020	542	47.79	1379638
Arctic-Deep	N04-3800m-8Ar	1022052783	1188656	3743	1034	529	52.65	1925073
Arctic-Deep	N07-3800m-8Ar	994926332	1123161	5657	1105	529	54.05	1815872
Antarctic-Surface	A3-09-0m-34An	781826277	951431	2501	948	526	36	1515871
Antarctic-Surface	A4-07-0m-34An	718598026	779224	5414	1201	553	47.73	1249411
Antarctic-Surface	A5-10-0m-34An	740123479	865339	3076	1006	540	38.36	1392632
Antarctic-Surface	UW042-0m-34An	566803843	711774	2396	885	511	37.24	1145776
Antarctic-Surface	UW044-0m-34An	701728802	857057	2609	944	523	36.28	1370970
Antarctic-Surface	UW048-33An	845844876	1061597	2934	865	502	46.66	1387252
Antarctic-Surface	UW050-0m-34An	668443019	943763	1519	743	479	34.12	1453686
Antarctic-Surface	UW051-33An	500967659	501405	7101	1398	609	57.13	859318
Antarctic-Surface	UW056-33An	514329838	469201	10206	1762	649	51.54	887529
Antarctic-Surface	UW064-33An	706330284	678071	8390	1517	622	46.54	1233009
Antarctic-Surface	UW072-33An	910524098	1020495	4089	1115	548	46.58	1397030
Antarctic-Surface	UW073-33An	785809140	840024	6101	1205	558	49.71	1385599
Antarctic-Deep	A3-09-300m-34An	803998712	988261	2954	932	510	44.42	1479881
Antarctic-Deep	A4-07-300m-34An	525903013	654134	2350	899	520	37.18	1021939
Antarctic-Deep	A5-10-300m-34An	758627908	923441	2768	976	517	44.51	1388709
Antarctic-Deep	A3-09-1000m-34An	738098116	915705	3088	908	503	44.99	1384514
Antarctic-Deep	A4-07-1000m-34An	802939503	1009207	2658	898	504	42.88	1512031
Antarctic-Deep	A5-10-1000m-34An	898076409	1147173	2598	864	493	44.74	1692531
Antarctic-Deep	A4-07-3000m-34An	687661871	907348	2196	822	486	41.04	1341473
Antarctic-Deep	A3-09-3500m-34An	886858986	981212	3845	1148	558	48.38	1540265
Antarctic-Deep	A5-10-3500m-34An	880009596	1112912	2373	887	503	46.19	1681333
