# Supplementary material for: Structure and function of the Arctic and Antarctic marine microbiota as revealed by metagenomics
Source: Microbiome. 2020 Apr 2;8:47. doi: 10.1186/s40168-020-00826-9 (PMC7119284; doi:10.1186/s40168-020-00826-9)
Supplement: Supplementary file 6 — Additional file 5: Table S4. Full list of genera and their abundance in the polar seawater. [file 40168_2020_826_MOESM5_ESM.xlsx]

## Sheet: Sheet1
Table S4 Full list of genera and their abundance in the polar seawater.
	AT04-0m-8Ar	B08-0m-8Ar	BB08-0m-8Ar	G02-7Ar	ICE04-0m-9Ar	K3-8Ar	N02-0m-8Ar	N04-0m-8Ar	N07-0m-8Ar	P06-0m-8Ar	UW012-0m-8Ar	UW022-8Ar	UW023-8Ar	UW024-9Ar	LB01-5m-8Ar	ICE04-100m-9Ar	AT04-300m-8Ar	BB08-300m-8Ar	LB01-300m-8Ar	N04-300m-8Ar	N07-300m-8Ar	P06-300m-8Ar	R16E-300m-9Ar	N02-500m-8Ar	AT04-1000m-8Ar	B08-1000m-8Ar	BB08-1000m-8Ar	ICE04-1000m-9Ar	LB01-1000m-8Ar	N07-1000m-8Ar	R16E-1000m-9Ar	N02-1500m-8Ar	ICE04-2280m-9Ar	AT04-3000m-8Ar	B08-3200m-8Ar	R16E-3236m-9Ar	BB08-3300m-8Ar	N04-3800m-8Ar	N07-3800m-8Ar	A3-09-0m-34An	A4-07-0m-34An	A5-10-0m-34An	UW042-0m-34An	UW044-0m-34An	UW048-33An	UW050-0m-34An	UW051-33An	UW056-33An	UW064-33An
Flavobacterium	0.0774986	0.0322804	0.00910116	0.00568207	0.0158275	0.0273796	0.0208908	0.0449206	0.0198356	0.00562526	0.00637455	0.0188317	0.0944806	0.0192444	0.11396	0.00420286	0.0727858	0.0184726	0.0196438	0.0198925	0.0122243	0.0191158	0.00107393	0.00988707	0.203796	0.0245753	0.358615	0.0108064	0.0212343	0.0120485	0.00192192	0.012127	0.0110921	0.021622	0.00141549	0.0057894	0.0386364	0.0302878	0.0150366	0.010265	0.00156442	0.00844337	0.0144201	0.0182372	0.00916966	0.0137025	0.00389493	0.0106365	0.0247315
Polaribacter	0.000532138	0.00483975	0.00151228	0.00297283	0.043929	0.0388796	0.0720631	0.012332	0.0151973	0.00510961	0.000247555	0.00902353	0.00438094	0.0007259	0.00287477	0.0210143	0.000644122	0.0296827	0.00193701	0.00121864	0.00335357	0.000978978	0.00468624	0.00116739	0.000307689	0.00505838	0.000964055	0.0425802	0.001155	0.00088574	0.00159744	0.00299895	0.0491707	0.0010359	0.000451753	0.00152114	0.0173496	0.00252697	0.00189611	0.0134622	0.00392149	0.0161705	0.00977438	0.0249576	0.0164015	0.00383482	0.00256211	0.0189533	0.0129346
Pseudoalteromonas	0.00557939	0.000599207	0.00266711	0.00269459	0.0424131	0.00343426	0.00109525	0.00123754	0.0207105	0.00690657	0.0108615	0.00198966	0.0027793	0.0763486	0.207274	0.0102652	0.00609439	0.0116656	0.0485725	0.000340502	0.00751849	0.0217694	0.00317298	0.00140563	0.345631	0.000604196	0.16327	0.0158244	0.043126	0.0156642	0.00411841	0.000449843	0.0161423	0.0357291	0.00266534	0.005131	0.00538522	0.00102154	0.0047954	0.00429874	0.0595732	0.0165639	0.00211587	0.00419311	0.0273317	0.00252537	0.000349379	0.000212164	0.000582395
Roseibacillus	0.000983649	0.00726731	0.00316203	0.000146445	0	0.118844	0.0003448	0.000151979	8.38966e-05	0.000375018	6.18888e-05	0.0687694	0.0154353	0.000935605	0.000856624	0.000993403	0.000198192	0.00817349	0.00231598	0.00148746	0.000121702	0.00141694	0.000439335	0.000238243	0.000990375	0.00583119	0.00130836	0.000145751	0.000604154	0.000351869	0.000349441	0.0022867	2.60991e-05	0.000452028	0.000692688	9.08141e-05	0.00985597	0.000376358	0.000132287	3.0596e-05	0.000250308	2.01753e-05	0	0	3.79958e-05	0.00196418	0.000232919	2.82885e-05	2.70882e-05
Alcanivorax	0.102686	0.00125987	0.00808381	0.00109834	0.00177672	0	0.00417816	0.00264878	0.00147418	0.00125006	0.00148533	0.002396	0.00237104	0.00456511	0.00876951	0.00129907	0.0541063	0.00528873	0.00785329	0.00114695	0.00501684	0.00726505	0.00251397	0.00926764	0.0155575	0.00103978	0.0061424	0.00306078	0.00876024	0.0096582	0.0140276	0.00732868	0.00232282	0.0179681	0.0110378	0.0135994	0.0161303	0.00415786	0.00743011	0.0046047	0.0745917	0.00545743	0.00724454	0.00624659	0.00245706	0.0312865	0.000168219	0.000367751	0.00209933
Unclassified	0.256216	0.113726	0.241882	0.108281	0.0875646	0.119081	0.13936	0.123711	0.109329	0.111661	0.127584	0.104485	0.126325	0.0758485	0.0830926	0.154563	0.127635	0.0854294	0.128853	0.152437	0.18016	0.194842	0.177247	0.185972	0.0642782	0.111608	0.0290043	0.160118	0.153793	0.203174	0.160568	0.202767	0.0818207	0.110577	0.167962	0.142011	0.121853	0.180132	0.275443	0.0570616	0.0898187	0.0237867	0.0421563	0.0507051	0.210624	0.0799701	0.0388716	0.0283027	0.125784
Sphingobium	0.00366046	0.000660664	0.00167725	5.8578e-05	0	0.000157535	0.00141976	0.00293102	8.38966e-05	3.12515e-05	0.000340389	0.000826689	0.00246526	6.45245e-05	5.80762e-05	0.000280191	0.00106528	0.000177134	0.00326343	0.00270609	0.000743736	0.00139118	9.763e-05	0.00276362	9.61529e-05	0.000941421	0.000137722	0.000166573	0.00154592	0.00088574	0.000324481	0.00732868	0.000104396	0.000282518	0.00734851	0.000363257	0.000330226	0.00137998	0.00250243	0.000107086	0.000292026	8.07013e-05	0.00282882	2.872e-05	0.0214677	9.35322e-05	0.272321	0.219859	0.133016
Synechococcus	0.000483762	0.0434348	8.24878e-05	0	0	0.000330823	0.000283953	0	0	6.25029e-05	0.00488922	0	0.00233964	0.0040973	0.00139383	0	0.000445931	0	0.00305289	7.16846e-05	0	5.15251e-05	0	0	0.0290286	0.081721	0.00336042	0	0.000906232	6.06671e-05	0	0.000937172	3.91486e-05	0.000621539	0.00158113	0	0	0	0	0	0	0	0	4.30799e-05	2.53306e-05	0.00439602	0.000336439	0	0
Croceibacter	0.000467636	0	0.000769886	0	0	0	0	0	0	0	0	9.80818e-05	0.000376855	0	0.000537205	0	9.90958e-05	0	0.000736904	3.58423e-05	0	0.000360676	4.8815e-05	0	0.000153845	0	0.000523344	0	0.00417577	7.28005e-05	9.98403e-05	0	0	3.7669e-05	0	0.000476774	0.000177814	3.58436e-05	7.71673e-05	0.00030596	0.000542333	0.000141227	0.000666958	0.0017232	0	0.0088388	0	0	0
Arenimonas	0.00641791	0.0187752	0.00959608	0.00215274	0	3.1507e-05	0.0105468	0.0144814	0.000347572	0.000187509	0.00637455	0.00676764	0.00759991	0.00220996	0.00172777	0	0.00676329	0.00404879	0.00850598	0.044767	0.00711282	0.00136542	0.000829855	0.0200362	0.00227882	0.0298445	0.00599091	4.16432e-05	0.00140377	0.0111627	0.00262081	0.05713	0.000182694	0.00226014	0.11717	0.00358716	0.00993218	0.0256998	0.0082569	3.0596e-05	8.34359e-05	5.04383e-05	0.000367977	0.00020104	0.0108288	0.00116915	0.0248318	0.0317822	0.0204786
Flexibacter	0.0154159	0.000153643	0.00670901	0.000248957	4.89006e-05	0.00031507	0.000223106	0.00130268	0.0190445	0.000390643	9.28333e-05	0.001205	0.00362723	0.00014518	0.0136189	0.000178303	0.0315372	0.00880611	0.0102324	0.0022043	0.0163216	0.00260202	4.8815e-05	0.00016677	0.0184421	9.83574e-05	0.0282743	0.000166573	0.00232777	0.0375651	0	5.62303e-05	0.000130495	0.00602705	4.51753e-05	6.81106e-05	0.0121167	0.00388903	0.00862069	0.00022947	8.34359e-05	0.000201753	0.000137991	0.00015796	0.000126653	0	3.88199e-05	9.90099e-05	0.000176073
Oleiphilus	0.00898184	0	0.00013748	0.000219668	0	0	0.000101412	0	0.000227719	0.000250012	0	0.000924771	0.000125618	0.00737192	0.000450091	7.64156e-05	0.012387	5.06098e-05	0.000294762	0	0.000378629	0.00190643	0.000561373	0.00066708	0.000182691	0	6.8861e-05	0.000208216	8.88462e-05	0.000448937	0.0134285	0.000168691	2.60991e-05	0.00305119	0.000150584	0.00497207	0.000304824	0.000232983	0.000804745	0.00432934	0.0216308	0.00839293	0.00211587	0.00169448	0.000367293	0.00121592	2.58799e-05	2.82885e-05	0.000230249
Sphingomonas	0.00116103	0.0019359	0.00120982	0.00171341	0.00154852	0.000519865	0.00239331	0.00330012	0.00125845	0.00146882	0.00157817	0.000966806	0.0013818	0.00154859	0.00092922	0.000611325	0.00109005	0.000733843	0.000821122	0.0038172	0.000919528	0.000850165	0.000414928	0.00114357	0.000384612	0.00136295	0.000385622	0.0007704	0.000977309	0.00114054	0.000599042	0.0031489	0.00173559	0.00143142	0.00274063	0.00070381	0.00088907	0.00335137	0.00229297	0.00253947	0.000292026	0.0016342	0.00984338	0.00281456	0.00572471	0.00144975	0.0606108	0.040297	0.0235261
Prosthecobacter	0.000306382	0.000230464	0.0013473	5.8578e-05	0.000146702	9.45209e-05	0.000304235	0.00356065	8.38966e-05	0.000156257	0.000216611	0.000280234	0.000298343	0	0	0	0	0	0.000442142	0.0022043	0.000527376	0.000180338	0	0.000238243	0	0.000547991	2.75444e-05	0	3.55385e-05	0.00042467	0	0.000955915	0	5.65036e-05	0.00246958	0	0.000203216	0.00137998	0.00122365	0	0	0	0	0	0	0	0	0	0.000433411
Candidatus_Aquiluna	0	9.21857e-05	0.000219968	0.00172805	0.00153222	0.0025048	0.0328574	0.00527584	0.00258881	0.00235949	0.000464166	0.0697782	0.0179634	0	0	0.000127359	0	0	0	0.00763441	4.05674e-05	0	0	0.000357364	0	0.000182664	0.000137722	0.0007704	5.33077e-05	0.000254802	0	0.00144324	0.00156595	0	0	0.000249739	0.000203216	0.00492849	0.000749625	0	0	0	0	0	0	0	3.88199e-05	9.90099e-05	0
Ulvibacter	0.000161254	0.00390253	0.000604911	0.00058578	0.000945411	0.0154857	0.00129807	0.00125925	0.00152212	0.00100005	0.000185667	0.00355897	0.00290492	0.00058072	0.000958258	0.000611325	0.000322061	0.00169543	0.000968503	0.000430108	0.000216359	0.000489489	0.000170853	0	0.000788454	0.00300693	0.00201074	0.00118683	0.00204346	0.000145601	0.000224641	0.000299895	0.000796022	0.000696877	6.02337e-05	0.0012941	0.00137171	0.000358436	0.000264574	0.00365622	0.000750923	0.00699075	0.00117293	0.00188116	0.00226709	0.00107562	0.000271739	0.000537482	0.00283071
Mamiellaceae_Group	3.22508e-05	0	0.000109984	0.0304899	0.0230648	0.033933	0.0150901	0.000238824	0.0122249	0.0354704	0.021166	0.0184534	0.00394127	4.83933e-05	4.35572e-05	5.09437e-05	4.95479e-05	0.000126525	0	0.00159498	0.000851915	0.00141694	0	0.000238243	0	0.000435583	0	0.00197805	3.55385e-05	0.00110414	0.000823682	0.000937172	0.00107006	0.000169511	0	4.54071e-05	5.0804e-05	0.000716872	0.00195123	0.000168278	0	2.01753e-05	0	2.872e-05	0	0.00430248	2.58799e-05	0.000127298	0
Candidatus_Pelagibacter	0.00767569	0.0977015	0.0158652	0.0756096	0.10882	0.00910552	0.0817378	0.0755987	0.12159	0.082582	0.127305	0.0270426	0.0249509	0.0779294	0.060951	0.0588145	0.0650068	0.0565312	0.0200438	0.00514337	0.0369975	0.024629	0.0367577	0.0482442	0.0154422	0.060265	0.017835	0.0682116	0.00284308	0.0276278	0.0241364	0.0148448	0.156086	0.0831921	0.00215336	0.00349634	0.0392207	0.0180831	0.0171973	0.126698	0.00634113	0.0903754	0.147329	0.157314	0.03084	0.0969929	0.00238095	0.0265064	0.0432327
Rhodospirillaceae_Group	0.00640178	0.00646836	0.0135555	0.00330966	0.00572136	0.00370207	0.00926902	0.0110076	0.00377535	0.00471897	0.00872633	0.00409141	0.00463217	0.0144857	0.00406534	0.0207596	0.0110987	0.00764209	0.00400034	0.0149642	0.0139146	0.0114386	0.024139	0.0226807	0.00099999	0.00737681	0.001088	0.020655	0.00289639	0.0171809	0.0286791	0.0171315	0.00965667	0.0104343	0.0197265	0.0306271	0.0141743	0.0200366	0.0138791	0.00514013	0.00508959	0.00349033	0.0031278	0.00409259	0.0017858	0.00285273	0.00296325	0.00216407	0.00337248
Sphingorhabdus	0.0122714	0.00210491	0.0219418	2.9289e-05	0.000326004	3.1507e-05	0.00811293	0.00829371	0.000982789	0.000156257	0.000123778	0.00285838	0.00243385	0.000161311	0.000595281	0.000509437	0.00483092	0.00326434	0.00374768	0.0358781	0.0116428	0.00175185	0.000146445	0.0102206	0.000759608	0.0039062	0.00527476	0.000916151	0.00545516	0.0166713	0.000524161	0.0232606	0.000665527	0.0015256	0.0130707	0.00108977	0.0100592	0.0289795	0.0263471	9.1788e-05	0.000834359	6.0526e-05	0.00183988	0.000603119	0.00920766	0.00229154	0.029309	0.0606506	0.0190836
Alkanindiges	9.67523e-05	0.000230464	0	0.000468624	0	0	6.0847e-05	4.34226e-05	2.39705e-05	0	0	0	0	0	0	0	0	0	0.000126326	0.000179211	0	0	0	4.76485e-05	0	0.000196715	0	0	5.33077e-05	0	0	0.000393612	0	0	0.000301169	0	0	0.000250905	0	0	0	2.01753e-05	0	7.17999e-05	0.00119054	0	0.00243271	0.00268741	0.00241085
Piscirickettsiaceae_Group	0.000870771	0.00719049	0.0040419	0.000981182	0.00616147	0.0022685	0.00405647	0.00243166	0.0205067	0.00171883	0.00297066	0.00341885	0.00174295	0.00856562	0.00535753	0.00929723	0.00740741	0.0372742	0.0028634	0.000949821	0.00584171	0.00638912	0.012399	0.00621814	0.00624994	0.00581714	0.00349814	0.00601745	0.0029497	0.00465923	0.0148512	0.00133078	0.00647258	0.0106227	0.00108421	0.0214775	0.00906851	0.00207893	0.00341741	0.00429874	0.00429695	0.00476138	0.00271383	0.00782619	0.00253306	0.0024786	0.000452899	0.0313861	0.000839733
Bacillus	0.00020963	0.0002151	0.00087987	0.000937248	0.000342304	0.0017959	0.000223106	0.000303958	0.000910878	0.000609404	0.00173289	0.000266222	0.000251237	0.00150019	8.71143e-05	0.000178303	0.000421157	0.000683233	0.000315816	0.000286738	0.00117645	0.000489489	0.00019526	0.00447896	0.000682686	0.000252919	0	0.000520541	0.000106615	0.00109201	0.0011232	0.0247601	0.000221842	0.000150676	0.0230545	0.00140762	0.000279422	0.000931933	0.0017528	0.000657814	0.00855218	0.000242104	0.000137991	0.00018668	0.00618066	0.000374129	0.00199275	0.00141443	0.000609484
Methylophaga	6.45016e-05	6.14571e-05	0	0.00016109	9.78011e-05	6.3014e-05	0.000141976	0.000217113	0.000551321	0	6.18888e-05	8.40701e-05	6.28091e-05	0	0.000232305	0.000916987	0	0.000860367	0.00105272	7.16846e-05	0.000121702	0.00113355	7.32225e-05	0.000142946	0.000355766	5.62042e-05	0.000702383	0.00166573	0.000781847	7.28005e-05	4.99201e-05	0.000356125	0.000939568	7.53381e-05	0.000301169	0.000635699	0	0	8.81912e-05	0.00030596	0.000333744	0.000998679	0.00149491	0.000947758	0.000139318	0.000467661	0.000181159	0.00157001	0.000284426
Pelagibacteraceae_Group	0.0549392	0.207064	0.111881	0.176569	0.244372	0.0209364	0.183636	0.213986	0.235474	0.216448	0.291868	0.0556404	0.0584596	0.183927	0.153641	0.211493	0.215608	0.11539	0.0687005	0.0233871	0.150072	0.0968157	0.174172	0.175204	0.0420765	0.135761	0.0343754	0.205239	0.0133802	0.154398	0.136781	0.0623032	0.31409	0.233153	0.0237321	0.0422059	0.118576	0.0903258	0.0833627	0.27697	0.0438038	0.198697	0.313723	0.306858	0.06092	0.277276	0.00533126	0.0501273	0.0920997
Simiduia	0.00241881	0.000460929	0.000357447	0.00193307	0.000586807	0.00031507	0.000486776	0.000868451	0.000791025	0.00117193	0.000495111	0.00170943	0.000816519	0.00224222	0.000827586	0.000305662	0.00138734	0.00111342	0.000736904	0.000734767	0.000500331	0.000978978	0.000414928	0.000881498	0.00103845	0.000702553	0.000509572	0.000395611	0.00106615	0.000546004	0.00154752	0.00065602	0.000535032	0.000414359	0.00158113	0.00174817	0.0012447	0.000519732	0.000661434	0.00368682	0.00250308	0.000938153	0.00259884	0.00140728	0.00188713	0.00243184	0.00251035	0.00155587	0.00242439
Pirellulaceae_Group	0.00125778	0.0124912	0.00170475	2.9289e-05	0	0.000330823	0.000365082	4.34226e-05	0	7.81287e-05	0.0002785	0.00196164	0.000282641	0.00120983	0.00232305	0.000560381	0.00151121	0.00167013	0.008127	0.00577061	0.000703168	0.00182914	0.00019526	0.00183447	0.000749993	0.0243083	0.000826332	8.32865e-05	0.00685893	0.00105561	0.000324481	0.00344879	7.82973e-05	0.000979395	0.00289122	0.000181628	0.00238779	0.00170257	0.000661434	0	0.000250308	2.01753e-05	0	0	2.53306e-05	0.000233831	2.58799e-05	5.65771e-05	0
Saccharophagus	0.00457961	0	0.000522423	2.9289e-05	0	0	4.05647e-05	4.34226e-05	2.39705e-05	0.00021876	0	0.00853312	0.00292062	0.00254872	0.0018294	0	0.00111483	7.59148e-05	0.00233704	0	0.000581466	0.00141694	0	0.00240625	8.65376e-05	5.62042e-05	5.50888e-05	0	0.00248769	0.000206268	0.000224641	7.49738e-05	2.60991e-05	0.000226014	0	0.000113518	0.00137171	0.000376358	4.40956e-05	0.000734304	0.00166872	9.0789e-05	0.0079115	7.17999e-05	0	0.00322686	0	0	0
Cryomorphaceae_Group	0.00543426	0.00313431	0.00225467	0.00210881	0.00761219	0.0247487	0.00610498	0.00106385	0.00797018	0.00214073	0.00182572	0.00626322	0.00818089	0.00900116	0.00545917	0.00519626	0.00175895	0.00364391	0.00370558	0.00046595	0.00263688	0.0029627	0.00158649	0.00131033	0.00210575	0.00257134	0.0025754	0.0126595	0.00541962	0.00347016	0.00154752	0.00116209	0.0104266	0.00190229	0.00168654	0.00211143	0.00350547	0.00245529	0.00252447	0.0176233	0.00227363	0.011853	0.00257584	0.00626095	0.0101956	0.00860497	6.46998e-05	0.000268741	0.00352146
Candidatus_Captivus	3.22508e-05	0.000184371	5.49919e-05	0.000571136	0	0.00036233	4.05647e-05	4.34226e-05	7.19114e-05	0	0	7.00584e-05	9.42137e-05	0	0	0.000101887	0	0	0	5.37634e-05	6.76123e-05	7.72877e-05	0.000122038	0.000119121	1.92306e-05	9.83574e-05	0	4.16432e-05	5.33077e-05	4.85337e-05	0.000299521	0.000168691	7.82973e-05	0	0.000346344	0.000204332	0	0	2.20478e-05	0.00182046	0.00312885	0.00175525	0.000597962	0.000344639	0.00105122	0.000374129	0.000323499	0.000353607	0.00216705
ZA3409c_Group	0.00504725	3.07286e-05	0.0184498	0	0	0	0	0	0	0	0	8.40701e-05	3.14046e-05	0	0.000130672	0.0114114	0.00606961	0.00850245	0.00311605	0.00408602	0.0192154	0.0196053	0.0265066	0.00695669	0	0.00026697	0	0.00403939	0.00282531	0.00772899	0.00576577	0.000749738	0.000495883	0.00702528	0.00131008	0.00108977	0.0244367	0.00661314	0.00574345	0.000122384	0.0129951	0.00013114	0	0	0	0	2.58799e-05	0	0
Nitrosopumilus	0.0384752	0	0.0563667	0	0.000456405	3.1507e-05	4.05647e-05	0.000759895	2.39705e-05	3.12515e-05	0	0	0	3.22622e-05	2.90381e-05	0.0729769	0.0415707	0.0454223	0.0158329	0.00528674	0.0760098	0.0592024	0.089844	0.0643494	1.92306e-05	0.000730655	0	0.0488892	0.0143576	0.0690756	0.0485473	0.00256785	0.00507627	0.0611745	0.00579749	0.0076965	0.0370107	0.0349116	0.0334245	0.000198874	0.0547757	0.000544734	0.000114993	0.00011488	0	0.00112239	0	0	0
Alteromonas	0.0012094	0.000184371	0.000164976	0.000278246	0.00101061	0	0	0.000434226	0.000191764	0.000375018	0.001114	2.80234e-05	0.000251237	0.00571041	0.0241887	0.000636797	0.000445931	0.000480794	0.0215176	0	0.000392152	0.0135254	0.000341705	9.52971e-05	0.0237498	0.000196715	0.0078777	0.00114519	0.0134513	0.000279069	0.00167232	0	0.000691626	0.00504765	0.000421636	0.00274713	0.000203216	0.000107531	0.000209454	0.00224881	0.0077804	0.00895784	0.00657759	0.00641891	0.000392624	0.00514427	0	0	0
Psychrobacter	0.0175283	0.000122914	0.00222717	0.000234312	0	0.0187782	0.000182541	4.34226e-05	0.000623232	0.000234386	0	0.0102986	0.0235534	0.000467802	0.00107441	0	0.0112721	0.000177134	0.113673	0.00374552	0.000324539	0.00638912	0.000146445	9.52971e-05	0.0103653	0.000196715	0.00632144	0	0.113101	0.000315469	0.000399361	0.000224921	0	0.00256149	9.03506e-05	0.000181628	0.00271801	0.000250905	0.00250243	3.0596e-05	8.34359e-05	4.03506e-05	0	0	0.000139318	0.000795024	0.000711698	0.00019802	4.06322e-05
Oleibacter	0.000112878	0	0	0.000395402	4.89006e-05	3.1507e-05	0	0	0.000119852	0.000203135	0.000309444	2.80234e-05	7.85114e-05	0.000500065	0.000261343	0	0.000148644	5.06098e-05	0.000505306	0	0	5.15251e-05	0	4.76485e-05	8.65376e-05	0	4.13166e-05	0	0.000426462	0	0.000249601	0	0	0.000169511	0.000120467	0.000181628	0	0	0	0.00901053	0.0261572	0.0123271	0.00101194	0.00011488	0.00193779	0.000187064	0.00011646	5.65771e-05	0.000704292
Seohaeicola	0.00309608	0.000814307	0.00329951	0.000688292	9.78011e-05	0.000157535	0.00196739	0.00920558	0.000671173	4.68772e-05	0.000340389	0.000840701	0.00128759	0.000225836	0.00158258	0.000280191	0.00198192	0.000607318	0.00132643	0.0302509	0.00267745	0.000463726	0.000268483	0.0015724	0.00153845	0.00155967	0.00666575	0.000312324	0.00312739	0.00388269	0.000923522	0.0042735	0.000326239	0.000527367	0.00204795	0.00217954	0.00200676	0.0158608	0.00648205	0.00022947	0.00191903	0.000272367	0.00255284	0.00022976	0.00376159	0.00144975	0.00829451	0.0117963	0.00528219
Phenylobacterium	0.000967523	0.000414836	0.000907366	0.000219668	0	0	0.000730164	0.00165006	4.79409e-05	0	0.000309444	0.000266222	0.00054958	4.83933e-05	5.80762e-05	0.000178303	0.000470705	0.000177134	0.000947448	0.00340502	0.000324539	0.000721352	0	0.000786201	0	0.00120839	0.000192811	0.000166573	0.000373154	0.000570271	4.99201e-05	0.00307392	5.21982e-05	0	0.00388507	0.000158925	0.000355628	0.00186387	0.00106932	0	4.17179e-05	0	0.000298981	7.17999e-05	0.00201378	0	0.029102	0.0155587	0.00518738
Prochlorococcus	3.22508e-05	0.00190517	0	0.000205023	3.26004e-05	9.45209e-05	0.000101412	0	3.59557e-05	0.000140632	0.000247555	9.80818e-05	7.85114e-05	0.00029036	2.90381e-05	0	0	0	8.42176e-05	0	0	0	0	0	0.00262497	0.00370948	8.26332e-05	6.24649e-05	0	0	0	3.74869e-05	0	5.65036e-05	6.02337e-05	4.54071e-05	0	0	0	0	0	0	0	0.00173756	0	0.00238507	0	0	0
Candidatus_Rhabdochlamydia	8.0627e-05	6.14571e-05	5.49919e-05	0	3.26004e-05	0	4.05647e-05	0	0	0	0	0.000126105	0.000188427	3.22622e-05	0	0.000152831	0	0	0.000294762	0.000143369	0	0.000412201	0	7.14728e-05	0	0.000168613	0	0.000145751	0.000924001	0.000145601	9.98403e-05	9.37172e-05	9.13468e-05	0	0.00076798	0.000272442	0	3.58436e-05	0.000132287	0	0	0	0	0	0	0	0	5.65771e-05	0.00728671
Amylibacter	0.000145129	0.0151646	0.000274959	0.00934319	0.0124696	0.00396988	0.00965439	0.00783777	0.0126924	0.0131412	0.017793	0.00724404	0.00645364	0.00893664	0.00937931	0.00198681	0.00188282	0.00485855	0.000779013	0.000268817	0.000405674	0.00159728	0.000610188	0.00228713	0.00277882	0.0105664	0.00243768	0.00695442	0.000142154	0.000388269	0.000823682	0.00108712	0.0162728	0.00416243	6.02337e-05	0	0.00246399	0.000824402	0.000959079	0.0185412	0.000125154	0.0169372	0.0136611	0.0147764	0.0125133	0.00710845	0.000879917	0.00240453	0.00660951
Tenacibaculum	0.000129003	0.00179762	0.00013748	0.000248957	0.00304813	0.00510413	0.0057399	0.00130268	0.00124646	0.000671906	0.000154722	0.00158332	0.00353301	0.000451671	0.000813067	0.00224152	7.43218e-05	0.00622501	0.000231598	0.00016129	0.00016227	0.000412201	0.000268483	4.76485e-05	0.000317305	0.00148941	0.00012395	0.00418515	0.000231	6.06671e-05	0.00014976	0.000206178	0.00378437	0.000244849	0.000105409	0	0.00307364	0.000179218	0.000407884	0.00221821	0.0133497	0.0037627	0.00216186	0.00404951	0.00221642	0.000935322	0.00015528	0.00209335	0.00266818
Kordia	4.83762e-05	0.000276557	5.49919e-05	0.00016109	0.00161372	0.00195343	0.00273811	0.000586205	0.000587276	9.37544e-05	0	0.000364304	0.000329748	0.000161311	0.000421053	0.000866043	0.000148644	0.00167013	0.000421088	0	9.46573e-05	0.000231863	0.000366113	9.52971e-05	0.000105768	0.000449634	0.0002479	0.00224874	0.000604154	2.42668e-05	7.48802e-05	0.000149948	0.00186609	0.000150676	3.01169e-05	0.000158925	0.000711256	0.000232983	8.81912e-05	0.000260066	0.000146013	0.000544734	0.00032198	0.00103392	0.000595268	0	2.58799e-05	0.000806223	0.000325058
AEGEAN_169	0.00119328	0.0253357	0.00371195	0.0159479	0.0115568	0.00031507	0.0163678	0.00297445	0.00630423	0.0180008	0.0164315	0.00535246	0.00759991	0.0352787	0.00484936	0.0136784	0.00782856	0.00835063	0.00566363	0.00078853	0.0108045	0.00401896	0.0117644	0.0111021	0.00562495	0.0181259	0.000853877	0.0116393	0.000852924	0.00666125	0.00888578	0.00174314	0.0160118	0.0299469	0.000210818	0.00165736	0.00828105	0.00689989	0.00382529	0.00394689	0.003254	0.00077675	0.00202387	0.00239812	0.000620599	0.0132348	9.05797e-05	5.65771e-05	0.000216705
Simkaniaceae_Group	0.000112878	0	5.49919e-05	0	4.89006e-05	0	6.0847e-05	0	0	4.68772e-05	6.18888e-05	0.00033628	0.000298343	6.45245e-05	0	0.000178303	0	0	0.000547415	0.000376344	6.76123e-05	0.000154575	0	0	0	2.81021e-05	0	0.000395611	0.00108392	6.06671e-05	9.98403e-05	0.000187434	0.000143545	3.7669e-05	0.000346344	0.000158925	0	7.16872e-05	2.20478e-05	0	0.000166872	0	0	0	0	0	2.58799e-05	2.82885e-05	0.00112416
Euzebya	0.00183829	0.000384107	0.00222717	2.9289e-05	0	7.87674e-05	0.000709882	0.000130268	5.99262e-05	3.12515e-05	0	0.00225588	0.000706603	3.22622e-05	0.00146642	0	0.000445931	0.00015183	0.00101061	0.00062724	0.00010818	0.000592539	4.8815e-05	7.14728e-05	7.69223e-05	0.000562042	0.00151494	0	0.00204346	0.000133468	9.98403e-05	0.00054356	0	9.41726e-05	0.000255993	9.08141e-05	0.000304824	0.00030467	0.00365993	0	0	0	0	0	2.53306e-05	0	0	0	0
NS4	0.000370884	0.0180223	0.000714895	0.00547704	0.00754699	0.0172973	0.00462437	0.00525413	0.0100197	0.00646905	0.00352766	0.00734212	0.00370574	0.00892051	0.00214882	0.00229247	0.00185805	0.00647806	0.00200017	0.000394265	0.00135225	0.00278236	0.00107393	0.00138181	0.00191344	0.0103556	0.00260295	0.00784975	0.002079	0.000715872	0.000848642	0.000730994	0.00613329	0.00542434	9.03506e-05	0.000499478	0.00205756	0.000448045	0.00084884	0.0165677	0.000771782	0.00607277	0.00735954	0.00633275	0.00282436	0.00837114	0.000168219	0.00114569	0.0034402
Candidatus_Atelocyanobacterium	0	0	0	0	0	3.1507e-05	0	0	0	0	0	5.60467e-05	0.0176494	0	0	0	0	0	0	0	0	0	0	0	0	2.81021e-05	0	0	0	0	0	0	0	0	0	0	0	0	0	0	0	0	0	0	5.06611e-05	0	0	0	0
Paraglaciecola	0	3.07286e-05	0	0.000102512	0.000163002	0	0.000425929	0.000629627	7.19114e-05	4.68772e-05	0	0	0	0.000177442	0.000290381	0.000840572	0	0	6.31632e-05	3.58423e-05	0.000229882	0.000541014	0.00078104	0	0.000269228	0	2.75444e-05	0.000416432	0.000142154	2.42668e-05	0.000449281	0.000112461	7.82973e-05	7.53381e-05	3.01169e-05	0.00168006	0.000355628	0.000627263	2.20478e-05	0.00359503	0.00565278	0.0185209	0.031117	0.00275712	0.000531942	0.00420895	0	9.90099e-05	0
Anaerospora	0.00316058	0.00244292	0.00118233	0.000644358	0.000293403	0.00143357	0.00300178	0.00262707	0.00195359	0.00101567	0.000618888	0.00369909	0.00789825	0.000483933	0.00439927	0.000203775	0.00106528	0.000582013	0.00195806	0.00664875	0.00101419	0.00146847	0.000341705	0.000309716	0.00451919	0.00130675	0.0066382	0.000353968	0.0398564	0.000825072	0.000424321	0.00279277	0.000313189	0.00113007	0.00106915	0.00106707	0.0012193	0.00363812	0.00661434	0.000871986	0.000750923	0.00129122	0.00103493	0.001795	0.00210244	0.00084179	0.00454193	0.00405941	0.00231604
Octadecabacter	0.000354759	0.0169929	0.000329951	0.0326572	0.00991051	0.024859	0.0174631	0.0222541	0.0181816	0.05294	0.00758138	0.0121341	0.0124519	0.00209704	0.00509619	0.0018085	0.000346835	0.00997014	0.00115799	0.0155735	0.000500331	0.00569353	9.763e-05	0.00102444	0.00187498	0.0151611	0.00129459	0.00635059	0.00414023	0.00095854	0.000698882	0.00151822	0.00845611	0.00137492	0.000376461	0.000885438	0.000685854	0.00906843	0.00270086	0.0375872	0.000688346	0.0362752	0.015501	0.0186392	0.0380338	0.00486368	0.0142469	0.00280057	0.0122168
Candidatus_Portiera	0.00303157	0.0165934	0.00890869	0.0808816	0.0466185	0.0161473	0.0325126	0.00861938	0.0405341	0.144663	0.0677373	0.0458462	0.0332103	0.0576849	0.0390708	0.0290379	0.0212808	0.0509388	0.0175804	0.00234767	0.034915	0.0270765	0.0320227	0.0175823	0.0165191	0.0136717	0.00673461	0.0229038	0.00762301	0.0186855	0.0229383	0.00365497	0.0171863	0.0476513	0.00225876	0.0244517	0.0247161	0.0112011	0.00970103	0.0422225	0.00753009	0.0260867	0.0112923	0.0253884	0.0177821	0.0582238	0.000698758	0.00222065	0.0135305
Celeribacter	0	0.000245829	0	0.000541847	0.000211902	0.00099247	8.11293e-05	0.000238824	0.000371542	0.000828164	6.18888e-05	0.000266222	0.000172725	0.000209704	0	0	0	0.00010122	0	3.58423e-05	0	0	0	0	0	0.000168613	6.8861e-05	0.000104108	0.000302077	0	0	0	0.000208793	0	3.01169e-05	0	0	3.58436e-05	6.61434e-05	0.000581324	4.17179e-05	0.000766662	0.000183988	0.00277148	0.000683925	0	0.000284679	0.00049505	0.000934541
Verrucomicrobium	4.83762e-05	0.000230464	0.000109984	0	3.26004e-05	0.0022685	0.000141976	0	2.39705e-05	3.12515e-05	0	0.00025221	3.14046e-05	0	0	0	0	0.00015183	0.000231598	0.000340502	6.76123e-05	0.00010305	7.32225e-05	0.000381188	0	5.62042e-05	0	0	0.000177692	7.28005e-05	0	0.000299895	0	0	0.00135526	0	0.000203216	0.000358436	7.71673e-05	0	0	0	0	0	0	0	0.000194099	0	4.06322e-05
Fluviicola	0.00309608	0.00096795	0.00115483	0.000117156	0.000407505	0.0280885	0.0012575	0.00210599	8.38966e-05	3.12515e-05	0.000247555	0.0028724	0.00417681	0.00179055	0.00132123	0.000229247	0.000545027	0.000531403	0.000968503	0.00184588	0.00194724	0.0012366	9.763e-05	0.00200124	0.00149037	0.00178448	0.00216224	0.00122848	0.00291416	0.00383416	0.000574081	0.00232419	0.000678577	0.000489698	0.00182207	0.00161195	0.000812864	0.000931933	0.00197328	0.000596622	0.00104295	0.00101885	0.00016099	0.000789799	0.00103855	0.00336716	0.000219979	0.000212164	0.00533637
Rheinheimera	0.00337021	0.000414836	0.000659903	0.0148202	0.00443365	0	0.00405647	0.0106385	0.00124646	0	0.0115732	0.00016814	0.000471069	0.0211479	0.000740472	0.00109529	0.0022792	0.000177134	0.000421088	0.00143369	0.00185258	0.00079864	0.00124478	0.0172964	0.00099999	0.00146131	0.000440711	0.00285256	3.55385e-05	0.00281495	0.00853634	0.00519193	0.00246636	0.000960561	0.0125286	0.0115334	0.000558844	0.00817234	0.00629465	0.00038245	0.000187731	0.000817101	0.00418574	0.000861599	0.0174528	0.000420895	0.00284679	0.00202263	0.0381537
Colwellia	0.000290257	0	0.000219968	0.00106905	0.00167892	0.00031507	0	0.00017369	0.000479409	0.000640655	0	0.000238199	0.0013661	0.00325848	0.00528494	0.0181105	0.000247739	0.000835063	0.00183173	0.000179211	0.00366459	0.000824402	0.00866467	0.000142946	0.00794223	8.43064e-05	0.00484782	0.00980698	0.00145708	0.000546004	0.0145018	0	0.00570265	0.000678043	0.000105409	0.0296281	0.000177814	0.000322592	0.000132287	0.00625688	0.0705868	0.118449	0.00837147	0.00459519	0.0136278	0.0466726	0.000258799	0.000693069	0.00395487
Subsaxibacter	0.0019673	7.68214e-05	0.000632407	0.000117156	0.000130401	0.000472605	0.000628752	0.00130268	0.000119852	0	9.28333e-05	0.000448374	0.00113056	0.000274229	0.00168421	0	0.00143689	0.000809758	0.00136854	0.00155914	0.000676123	0.000257626	0	0.00016677	0.00115384	0.000154562	0.00326401	0	0.001155	0.000837206	0.000249601	0.00059979	5.21982e-05	0.000339021	0.000165643	0.000522181	0.00106688	0.00193555	0.00116853	0.000183576	0.000417179	0.000121052	0.000574964	0.000617479	0.000785247	0.00182388	0.000401139	0.000990099	0.00157111
Sulfitobacter	0.000741768	0.00419445	0.000687399	0.00494984	0.00208642	0.040644	0.00480691	0.00336525	0.00343976	0.00767223	0.00433222	0.0080287	0.00695611	0.00179055	0.0046461	0.000611325	0.000594575	0.00298598	0.00290551	0.00605735	0.000594989	0.00265354	0.000146445	0.000309716	0.00168268	0.00479141	0.00369095	0.00147834	0.015477	0.000703738	0.000973442	0.00151822	0.00260991	0.00133725	0.000737863	0.00133951	0.00116849	0.00331553	0.00174178	0.00809264	0.0011681	0.00726312	0.0032198	0.00425055	0.00804245	0.00294627	0.0050207	0.0060396	0.00388715
Leeuwenhoekiella	0.00219305	0	0.00976106	0.000322179	0	0	0.000365082	4.34226e-05	3.59557e-05	0.000250012	0	0.000406339	0.000376855	0	0.0046461	0.000101887	0.000743218	0.000986892	0.0153697	0.000752688	0.000419196	0.00453421	0.000829855	0.00138181	0.000596148	0	0.00747831	0	0.0336016	0.00185641	0.00217153	0.00178063	0	0.000772215	9.03506e-05	0.0205921	0.0222521	0.000985698	0.000661434	0.000183576	0.000876077	0.000796925	0.000505968	0.00024412	3.79958e-05	0.00060796	0	0	0
Pseudidiomarina	0.000241881	0	0.000109984	0.000336824	0.00220052	0.000157535	0.000141976	6.51339e-05	0.000395513	0.000187509	0.000866444	2.80234e-05	6.28091e-05	0.00669441	0.00535753	0.000433022	0.000346835	0.000202439	0.0018949	3.58423e-05	0.000148747	0.000644064	9.763e-05	0.000238243	0.00859607	0	0.00437956	0.000624649	0.00129716	0.00049747	0.000624002	0.000187434	0.000652477	0.000960561	0.000331285	0.00163465	0.000101608	8.96089e-05	0.000341741	0.000260066	0.00173129	0.00152324	0.000620961	0.000502599	0.00181114	0.000374129	7.76398e-05	0.000212164	0.00262755
Saprospiraceae_Group	0.00193505	0.000522386	0.000714895	0.000527202	0.000342304	0.018983	0.000811293	0.000434226	0.000311616	0.00010938	0	0.00154129	0.000471069	0	0.000406534	0.000254719	0.00175895	0.000227744	0.00315816	0.000448029	0.00114941	0.00257626	4.8815e-05	0.000857674	0.000153845	0.000547991	8.26332e-05	0.000458076	0.000568616	0.00161374	0.000524161	0.000880942	0.000717725	0.00037669	0.00155102	0.000635699	0.000965275	0.00116492	0.00160949	0.000122384	0	0.000635523	4.59971e-05	0.0002872	0.00024064	0.000187064	0.00011646	0.000749646	8.12645e-05
ZD0417	0.00219305	3.07286e-05	0.0155627	7.32225e-05	0.000342304	0	0.000202823	8.68451e-05	0.000455439	0.000171883	6.18888e-05	0	0	0.000354885	0.000101633	0.0187982	0.00594575	0.0035933	0.00191595	0.00046595	0.0118862	0.00824402	0.024139	0.007457	9.61529e-05	0.00012646	0	0.00564266	0.00246993	0.00854193	0.00519169	0.000693507	0.00114836	0.00890873	0.00124985	0.00236117	0.0051058	0.00333345	0.00381427	0.000887284	0.0119105	0.000242104	0.00016099	0.00018668	2.53306e-05	0.000982089	0	0	0
Loktanella	0.000483762	0.00227391	0.000604911	0.00304606	0.000749808	0.0146665	0.00271783	0.00392974	0.0015461	0.00510961	0.00269216	0.00346089	0.00339169	0.00130662	0.00171325	0.000280191	0.00012387	0.000961587	0.000568469	0.00555556	0.000473286	0.00115932	7.32225e-05	0.000238243	0.00151922	0.00229032	0.0015838	0.000333146	0.00796062	0.00046107	9.98403e-05	0.000974659	0.00086127	0.000339021	0.000466811	0.000408664	0.000304824	0.00274203	0.00155437	0.00523192	0.000834359	0.0057197	0.00183988	0.0176197	0.00639597	0.00060796	0.00380435	0.00302687	0.00307451
NS5	0.00116103	0.012737	0.0047568	0.00140587	0.00594957	0.00567126	0.00154146	0.0038429	0.00516564	0.00159382	0.00371333	0.0028724	0.00298343	0.0189218	0.00271506	0.00700476	0.00329493	0.00136647	0.00147381	0.0015233	0.0065584	0.00208677	0.00566254	0.00281126	0.0064134	0.00878191	0.00325024	0.00374789	0.00273646	0.00209908	0.00212161	0.000674764	0.00390182	0.00879572	0.000135526	0	0.00226078	0.00129037	0.00120161	0.00241708	0.0015227	0.00225964	0.00298981	0.00476751	0.00191246	0.00654726	9.05797e-05	0.000608204	0.00182845
Flavobacteriaceae_Group	0.00187055	0.00820453	0.00131981	0.000849381	0.00200492	0.0534673	0.00429985	0.006166	0.00280454	0.00221885	0.0002785	0.00549258	0.00613959	0.0007259	0.00451543	0.00122265	0.00165985	0.00789514	0.0033266	0.00182796	0.00131168	0.00128813	0.000512558	0.000619431	0.00506726	0.00834633	0.0129321	0.0015408	0.00430016	0.00095854	0.000499201	0.00178063	0.00185304	0.000508532	0.000421636	0.00170277	0.0038611	0.00184594	0.00121263	0.00907172	0.0103669	0.00828197	0.00825648	0.00379103	0.00160849	0.010008	0.000388199	0.00256011	0.00283071
Oceanicaulis	0.000548263	0.000445564	0.000577415	0.000410046	0.000244503	0.00036233	0.000425929	0.000586205	0.000167793	0.000562526	0.000154722	0.000196164	0.000423962	4.83933e-05	7.25953e-05	0.000152831	0.000148644	0.00010122	0.000147381	0.000734767	4.05674e-05	0.00010305	0	0.000262067	5.76918e-05	0.00026697	5.50888e-05	0.000353968	0.000888462	0	0.000324481	0.000899685	0.000221842	7.53381e-05	0.000361402	0.000272442	0.000330226	0.000412201	0.000749625	0.00162159	0.0332283	0.00182587	0.00832548	0.0017232	0.00140585	0.00140298	0.00151398	0.000905233	0.000528219
Pseudomonas	0.0130454	0.02615	0.00863373	0.061873	0.00143442	0.00185891	0.00261642	0.047678	0.00518961	0.00104692	0.00454883	0.00465188	0.00348591	0.00285521	0.00410889	0.000331134	0.0198192	0.0036186	0.00770591	0.049319	0.00973618	0.00682708	0.000366113	0.00669462	0.0117499	0.0342143	0.0140614	0.000624649	0.00463777	0.0121213	0.00436801	0.0119396	0.000482833	0.002618	0.0576437	0.005131	0.0276628	0.0317036	0.0195123	0.014992	0.0251768	0.0303437	0.00903843	0.00241248	0.0607807	0.00472338	0.13147	0.0597454	0.0500589
Chlamydiaceae_Group	0.000258006	3.07286e-05	0.00013748	0	0.000179302	0	0.000223106	8.68451e-05	3.59557e-05	6.25029e-05	0.000402278	0.000378316	0.000565282	3.22622e-05	0	0.000178303	0.000371609	0.00015183	0.000505306	0.000448029	9.46573e-05	0.000463726	0.000219668	0.000309716	0	0.000281021	0	0.000333146	0.00117277	0.000206268	0.00014976	0.000674764	0.00030014	0.000131842	0.000677629	0.000522181	0.000177814	0.000340514	0.000176382	3.0596e-05	0.000166872	2.01753e-05	6.89957e-05	2.872e-05	2.53306e-05	0	0	0	0
Candidatus_Actinomarina	0.000532138	6.14571e-05	0.00074239	5.8578e-05	0.00104321	0.000236302	0.000101412	0.000651339	9.58819e-05	3.12515e-05	0.000990222	0	0	0.00130662	0.000275862	0.00109529	0.00163508	0.0010122	0.00124221	0	0.000527376	0.000978978	0.00100071	0.00102444	8.65376e-05	0.000182664	0	0.000936973	7.1077e-05	0.000812939	0.000499201	3.74869e-05	0.000613329	0.0135609	0	4.54071e-05	0.000304824	0.000232983	0.00025355	0	4.17179e-05	4.03506e-05	0.000137991	0.000560039	0	0.0028995	0	0	0
Shewanella	0.000709517	0.000199736	8.24878e-05	0.0122721	0.0363331	0.000204795	0.000405647	0.00128097	0.00118654	0.000671906	0.000433222	0.000546456	0.000408259	0.0746548	0.00241016	0.0044321	0.000396383	0.000936282	0.00130537	0.000358423	0.000311017	0.000953215	0.00248957	0.000643255	0.00404804	0.000421532	0.00170775	0.00864097	0.00179469	0.000436803	0.017472	0.000356125	0.00918688	0.000659208	0.00108421	0.0407301	0.000609648	0.000842324	0.000551195	0.00148391	0.00550677	0.0170481	0.00416274	0.00624659	0.0236208	0.000888556	0.00269151	0.00127298	0.00545826
Polycyclovorans	0.000790144	4.60929e-05	0.000714895	4.39335e-05	0.000114101	0	0.00105468	0.000977008	0	0.000468772	0	0.00138716	0.00279501	0.00141954	4.35572e-05	0	0.000222965	5.06098e-05	0.0036003	0.00164875	0.000419196	0.00600268	0.000561373	0.000690904	0	0.000491787	0	0.00012493	0.001155	0.000351869	0.000574081	0.00365497	0.000130495	7.53381e-05	0.00103903	0.00217954	0.000431834	0.00120076	0.000617338	6.1192e-05	0.000125154	0	0.000367977	0.000804159	3.79958e-05	0.000795024	5.17598e-05	0	0.000148985
Pseudofulvibacter	0	0.000353379	0	0	0	0.000189042	4.05647e-05	6.51339e-05	8.38966e-05	3.12515e-05	0.000123778	0.000112093	0.00296773	6.45245e-05	0.00124864	0	7.43218e-05	0.000607318	4.21088e-05	0	0	0.000180338	0	0	5.76918e-05	0.000618247	9.64055e-05	0	0	0	0	0	0	3.7669e-05	0.000120467	0	0.000177814	0	0	0.000336556	0.000166872	0.000917977	0.000298981	0.00024412	0.000189979	0.000374129	0.00010352	4.24328e-05	0.000433411
Roseobacter	0.000354759	0.00264266	0.000412439	0.00111298	0.000456405	0.00401714	0.00095327	0.00162835	0.000587276	0.00184384	0.00736477	0.00162536	0.00323467	0.0011937	0.00146642	0.000101887	0.000346835	0.00106281	0.000673741	0.00188172	0.000229882	0.000618302	9.763e-05	0.000262067	0.000903837	0.00290857	0.00137722	0.000312324	0.00481547	0.000279069	0.000474241	0.000299895	0.000508932	0.000621539	0.000361402	0.000817327	0.00050804	0.00193555	0.000584267	0.00200404	0.000354603	0.00337937	0.00114993	0.00156524	0.00219109	0.00159005	0.00168219	0.0015983	0.00200452
Thalassospira	0.00156416	4.60929e-05	0.000577415	0.000219668	0.000114101	6.3014e-05	0.000202823	0.000108556	0	6.25029e-05	0.000897388	0.000532444	0.00034545	0.00137114	4.35572e-05	0.000254719	0.000718444	0.00015183	0.000210544	0.000304659	0.000676123	0.000180338	0.000463743	0.000405013	0.000701916	8.43064e-05	0.000206583	0.000333146	0.000248769	0.000825072	0.001248	0.000206178	0.000208793	0.00037669	0.000527045	0.00308768	0.000330226	0.00030467	0.000782697	4.5894e-05	0.000980372	5.04383e-05	9.19942e-05	7.17999e-05	0.00148184	0.000140298	0.000232919	0.000183876	0.00108353
Coraliomargarita	0	3.07286e-05	0.000192472	0.00074687	4.89006e-05	0.000220549	0	0.000151979	2.39705e-05	0.00143757	0.00102117	0.00435763	0.00230824	0	0.000551724	0.00068774	9.90958e-05	0.00172073	0.000273707	7.16846e-05	0.000121702	0.000154575	0.000903078	9.52971e-05	0.000336535	2.81021e-05	5.50888e-05	0.00116601	0	0.000279069	0.000648962	7.49738e-05	0.000730775	0	3.01169e-05	0.00376879	0.00195595	0.00249113	0.000319693	0.000550728	4.17179e-05	0.000272367	0	2.872e-05	5.06611e-05	0	0.00014234	0	0.000853277
Thalassiosira	0.000241881	0.000153643	0.000329951	0.00045398	4.89006e-05	0.0102713	6.0847e-05	4.34226e-05	0	0	0	0.000728608	7.85114e-05	0.000241967	0.000203267	0.000101887	0.000272513	0.000278354	0.000252653	7.16846e-05	6.76123e-05	0.00010305	0.000854263	7.14728e-05	0	0	0	0.00012493	0.000106615	0.000291202	0.00329473	3.74869e-05	5.21982e-05	0.000150676	4.51753e-05	0.00846842	0.000355628	0.000322592	5.51195e-05	0.000826092	0.000229449	0.000675873	0	0	0.00043062	0.00084179	0.000194099	0.000113154	0.000216705
Formosa	0.00135453	0.02151	0.000989854	0.00207952	0.00392834	0.0289549	0.00841717	0.00138952	0.00147418	0.0069847	0.00213517	0.0130729	0.0100809	0.00143567	0.00376044	0.000713212	0.00081754	0.000733843	0.00103167	0.000376344	0.000419196	0.00113355	0	0.000309716	0.00327881	0.0161868	0.0076298	0.00191559	0.00264762	0.000473203	0.0001248	0.000824711	0.00305359	0.000357856	0.000135526	0.000635699	0.000939873	0.000806481	0.000529147	0.0030749	0.000771782	0.0017956	0.00338079	0.00104828	0.00110188	0.00439602	0.000219979	0.00096181	0.00185554
Cobetia	0	0	0	4.39335e-05	0.000277103	4.72605e-05	0	0	3.59557e-05	0	0	0	0	0.000596851	0.0006098	0	0	0	0.00018949	0	0	0	0	0	0.00083653	0	0.000385622	4.16432e-05	8.88462e-05	0	0	0	9.13468e-05	5.65036e-05	0	4.54071e-05	0	0	3.30717e-05	3.0596e-05	0.000333744	0.000151315	0	0.00017232	0.000113988	0	0	0	0
Imtechella	0.00206405	0.000998679	0.000604911	0.000190379	0.000603107	0.00099247	0.000547623	0.00049936	0.000479409	0.000187509	9.28333e-05	0.000518432	0.00281071	0.000532327	0.00301996	0.000254719	0.00218011	0.000531403	0.000989557	0.000322581	0.000405674	0.000669827	7.32225e-05	0.000476485	0.00494226	0.000632298	0.00917229	0.000416432	0.001155	0.000546004	0.000299521	0.000524816	0.000430635	0.00058387	0.000225876	0.000976252	0.00152412	0.000394279	0.000562219	0.00114735	0.000166872	0.000534646	0.00048297	0.000674919	0.000392624	0.000514427	0.000168219	0.000311174	0.00073138
Silanimonas	0.00299932	0.000629936	0.00527922	2.9289e-05	0	0	0.00113581	0.00319156	0.000215734	9.37544e-05	0.000185667	0.00476397	0.0113213	4.83933e-05	0.00180036	0	0.00175895	0.00136647	0.00317922	0.00724014	0.00193371	0.00113355	0	0.00171535	0.000567302	0.00115219	0.00906211	0	0.00108392	0.00274215	9.98403e-05	0.00515445	0	0.00099823	0.00540598	0.000158925	0.00142251	0.00345891	0.00273393	0	0	0	0	0	0.000303967	0	0.000815217	0.00127298	0.000799101
Candidatus_Rhodoluna	0	3.07286e-05	8.24878e-05	0.00029289	0.000228203	0.000267809	0.00432014	0.000651339	0.000359557	0.000203135	0.000123778	0.00940184	0.00241815	0	0	0	0	0	0	0.0012724	2.70449e-05	0	0	7.14728e-05	0	4.21532e-05	0	0	0	2.42668e-05	0	0.000224921	0.000274041	0	0	0	0	0.000842324	0.000154335	0	4.17179e-05	0	0	0	0	0	2.58799e-05	9.90099e-05	0
Spongiibacter	0.00659528	3.07286e-05	0.00241964	0.000600425	0.000456405	0	0.000791011	0.000607916	0.000407498	0.00264075	0.000123778	0.00606706	0.00488341	0.00701703	0.00107441	0.000331134	0.00386473	0.000480794	0.00547415	0.00062724	0.00123054	0.012263	0.00241634	0.00383571	0.000442303	0.000154562	0.000564661	0.000978616	0.00732093	0.00175935	0.0274561	0.00335508	0.000704676	0.00114891	0.000843272	0.0158244	0.00236238	0.00168465	0.00267881	0.00107086	0.0126823	0.00188639	0.00459971	0.00502599	0.00542074	0.0207642	0	0.000127298	0.00837024
Perlucidibaca	0.000693392	0.000476293	0.000522423	0.00487662	0	4.72605e-05	0.00162259	0.00221455	0.000131838	0	6.18888e-05	9.80818e-05	0.000109916	0	0	0	0.000594575	0.00015183	0.00151592	0.000430108	0.000960095	0.000360676	0	0.00350217	0	0.00092737	0	0	0	0.00133468	0	0.00440471	0	0.000226014	0.00252982	0	0.000431834	0.00220438	0.00084884	0.00122384	0.00308713	0.00456971	0.00128792	0.000387719	0.0266478	0.000748258	0.0261128	0.00394625	0.0137472
Balneatrix	0.000274132	0.00141351	0.00104485	0.0249689	0.0554206	0.010224	0.0196739	0.0252502	0.073865	0.0216104	0.00216611	0.013157	0.00279501	0.000677507	0.000798548	0.0089661	0.00109005	0.0486614	0.00111588	0	0.00147395	0.00224134	0.000610188	0.000857674	0.000221152	0.000969523	0.0002479	0.0204052	7.1077e-05	0.000764405	0.00197185	0.00183686	0.0377523	0.00145026	6.02337e-05	0.000295146	0.0107196	0.00146959	0.00199533	0.0297393	0.00317056	0.03222	0.0560705	0.0462822	0.0223542	0.00173035	0.000181159	0.00241867	0.00326412
OCS155_Group	0	0	0.000109984	0	0	3.1507e-05	0	0	0	0	0	0	0	0	0	7.64156e-05	7.43218e-05	5.06098e-05	0	0	0.00016227	7.72877e-05	0.000122038	9.52971e-05	0	0	0	0.000104108	0	0.000121334	4.99201e-05	0	0	0.000395525	0	0	0	0	2.20478e-05	0	4.17179e-05	0	0	0.00020104	0	0.000187064	0	0	0
Rhodobacteraceae_Group	0.0042571	0.0191439	0.00646155	0.0189353	0.0122251	0.0143987	0.0135283	0.0186934	0.0149096	0.0266888	0.02228	0.0118819	0.0136453	0.0181636	0.0112377	0.00384625	0.00495479	0.0142214	0.005032	0.0255556	0.0054766	0.00528133	0.00144004	0.00478868	0.00535572	0.0150346	0.00720286	0.00710017	0.012936	0.00638218	0.00269569	0.00805968	0.0135715	0.0102083	0.00484881	0.00351905	0.00652831	0.0242661	0.0116964	0.022075	0.00254479	0.0218297	0.0134772	0.0180648	0.0212397	0.0121124	0.0163043	0.0207638	0.0148443
Sediminicola	0.000145129	0.00422518	0.000384943	0.000600425	0.00244503	0.00593907	0.00251501	0.00297445	0.00270866	0.000515649	0.000742666	0.0021578	0.00114627	0.000548458	0.00105989	0.000967931	0.000247739	0.000860367	0.000694795	0.000645161	0.000311017	0.000180338	0	0.000714728	0.000557687	0.00363922	0.00892439	0.00185312	0.00142154	0.00112841	0.00017472	0.000768481	0.00232282	0.000244849	0.000496928	0.000227035	0.0012701	0.00188179	0.00143311	0.00084139	0.000375462	0.000867539	0.00128792	0.00192424	0.00146917	0.000374129	0.00117754	0.00120226	0.00146276
Waddlia	0.000112878	4.60929e-05	0.000164976	0	6.52007e-05	0	0	0	0	3.12515e-05	0.000123778	9.80818e-05	0.000172725	0	4.35572e-05	5.09437e-05	4.95479e-05	0.00010122	0.00033687	0.000143369	4.05674e-05	0.000231863	4.8815e-05	0.000119121	0	4.21532e-05	0	0.000312324	0.000462	0	0.0001248	0.000299895	0.000247941	0.000113007	0.000376461	0.00031785	5.0804e-05	0.000143374	6.61434e-05	0	0.000458897	0	0	0	0	0	0	0	0.00640635
Glaciecola	9.67523e-05	4.60929e-05	0	0.000146445	0.000489006	0.000141781	0.000202823	0.000651339	0.000143823	3.12515e-05	9.28333e-05	0	0	0.00120983	0.00310708	0.000585853	9.90958e-05	5.06098e-05	0.00204228	0.000179211	0.000243404	0.00136542	0.000512558	0	0.00279805	7.02553e-05	0.000922738	0.000312324	0.00111946	0.000121334	0.000948482	0.000187434	0.000221842	0.000414359	0.000210818	0.00274713	0.000101608	0.000663106	6.61434e-05	0.00148391	0.00492272	0.00931091	0.0122582	0.00426491	0.00117787	0.00341393	5.17598e-05	0	5.41763e-05
Thalassomonas	0.000306382	6.14571e-05	0	0.000761514	0.000635707	3.1507e-05	0.000162259	0.00049936	0.000539336	0.000359392	0.000185667	0.000602502	0.000408259	0.000564589	0.000856624	0.00282738	0.00012387	0.000430184	0.00071585	0	0.000473286	0.000437964	0.00156208	0.00016677	0.000769223	2.81021e-05	0.000482027	0.00129094	0.000390923	7.28005e-05	0.00374401	3.74869e-05	0.000991766	0.000244849	7.52921e-05	0.00712891	0.000330226	0.000125453	5.51195e-05	0.00171338	0.0121191	0.0201451	0.00515168	0.00145036	0.00291301	0.00561193	6.46998e-05	0.000113154	0.000704292
NS9_Group	0.00117715	0.00270411	0.00159476	0.000205023	0.00228203	0.00868017	0.0022919	0.000195402	0.00212139	0.000296889	0.000464166	0.00400734	0.00147601	0.00300039	0.0018294	0.002267	0.000668896	0.00991953	0.0014317	0.000179211	0.00231234	0.00319456	0.00236753	0.00152475	0.000153845	0.00164397	0.000234128	0.00174902	0.000959539	0.000303335	0.00102336	0.000299895	0.00206183	0.00246732	6.02337e-05	0.000340553	0.0159524	0.000179218	0.000242526	0.0247522	0.00100123	0.00175525	0.0015639	0.0188977	0.000316632	0.00514427	0	0	0.00101581
lheB3_7_Group	0.0012094	0.00124451	0.00195221	0	6.52007e-05	0	0.000750446	0.00110728	2.39705e-05	6.25029e-05	0.000433222	0.000602502	0.000235534	3.22622e-05	8.71143e-05	0.000152831	0.000644122	0.000430184	0.000842176	0.00154122	0.0028262	0.000515251	4.8815e-05	0.00259685	1.92306e-05	0.00193905	2.75444e-05	0.00012493	0.000142154	0.00289989	0.000474241	0.00378617	0.000104396	0.000395525	0.0119865	0.000590292	0.00104148	0.00311839	0.00168666	0	6.25769e-05	0	0	0	0	0	0	0	0
ML602J_51	3.22508e-05	0.000814307	0.000109984	0.000922604	0.00088021	0.000378084	0.00440127	0.00017369	0.000143823	0.000546901	0.000649833	0.0120921	0.00709743	3.22622e-05	0	0	0	0	0	0.000537634	4.05674e-05	5.15251e-05	0	0.00016677	0	0.00144726	0.000220355	0.000208216	8.88462e-05	0	0	0.00054356	0.000782973	0	9.03506e-05	6.81106e-05	0	0.00069895	6.61434e-05	0	6.25769e-05	2.01753e-05	0	0	3.79958e-05	0	2.58799e-05	0.000113154	0
Mycoplana	0.00138678	0.000184371	0.00214468	0.000732225	4.89006e-05	3.1507e-05	0.000851858	0.0017369	2.39705e-05	6.25029e-05	0	0.000952795	0.00163304	9.67867e-05	0.000232305	0	0.000545027	0	0.00315816	0.00345878	0.000608511	0.00239592	7.32225e-05	0.000643255	0.000173075	0.000632298	0.000578433	0	0.00255877	0.000715872	0.00014976	0.00290523	0	0	0.00182207	0.000136221	0.000406432	0.00189971	0.0015213	3.0596e-05	0.000146013	0	4.59971e-05	0	0.00173514	9.35322e-05	0.0225285	0.0381754	0.0172416
Streptophyta_Group	0.00519238	0.000384107	0	0	0	3.1507e-05	0.00300178	0.000325669	0.0203509	0.00387518	0	0	0	0	0.00259891	0	0	0	0.00347398	0.00046595	0.0238672	0.0119538	0	0.00033354	0.00191344	0.000309123	0	0	0.000959539	0.0241455	0	0.000412356	2.60991e-05	0.00436961	0.000165643	0	0	0.000215061	0.022599	0	0	0	9.19942e-05	0.00011488	0	0.000187064	0	0	9.48086e-05
Rhodococcus	0.00456349	0.000522386	0.0034095	0.000336824	0	0	0.000588188	0	0	0.000578152	0	0.0103967	0.0158436	4.83933e-05	0.00119056	0	0.00485569	0.00121464	0.0274549	0.00706093	0.00093305	0.0146331	0	0.00131033	0.00137499	0.00171423	0.00100537	8.32865e-05	0.0149617	0.00237815	9.98403e-05	0.00596041	0	0.00182695	0.00379472	9.08141e-05	0.00353088	0.00609341	0.00935929	0.00104026	0.000229449	0.000141227	6.89957e-05	0	0.000151983	0	0.000336439	0.00118812	0.000203161
Criblamydiaceae_Group	8.0627e-05	4.60929e-05	0.00013748	0	0	0	0.000101412	0	0	0	6.18888e-05	0	6.28091e-05	0	0	0	7.43218e-05	5.06098e-05	0	0.000125448	0	0	0	4.76485e-05	0	9.83574e-05	0	6.24649e-05	0.000266539	6.06671e-05	4.99201e-05	0.000224921	2.60991e-05	0	0.000210818	4.54071e-05	0	8.96089e-05	0	0	0	0	0	0	0	0	3.88199e-05	2.82885e-05	0.000108353
Saccharina	0	0	0.000109984	2.9289e-05	0	0.000724661	0	8.68451e-05	0	0	0	0.00099483	0	3.22622e-05	0	0	0	0	0.000315816	7.16846e-05	8.11348e-05	0.000128813	0.00124478	0	0	0	0	0	0.000124385	4.85337e-05	0.00464257	0	0	0	0	0.012101	0	0	5.51195e-05	0	0	0	0	0	0	0	0	0	0
Owenweeksia	0.000935273	6.14571e-05	0.000274959	2.9289e-05	0.000114101	0.000787674	0.000547623	0.000434226	0.000191764	0	0	0.000658549	0.00089503	0.00104852	0.000333938	0	4.95479e-05	5.06098e-05	0.000378979	8.96057e-05	9.46573e-05	0.000154575	0	0.000238243	0	4.21532e-05	4.13166e-05	0.000458076	0.001848	0.000182001	0.000274561	0.000262408	0.000260991	0	0	0.000749217	5.0804e-05	0.000537654	0.00019843	0.000780198	0.000250308	0.000766662	0.000114993	0.000861599	0.000126653	0.0028995	2.58799e-05	0	0.000690748
NS2b	0.00166092	0.00391789	0.00241964	0.00120085	0.00317854	0.00256782	0.000973552	0.000325669	0.00339182	0.00318765	0.000402278	0.00142919	0.00315616	0.00561363	0.0027441	0.00224152	0.00346835	0.002075	0.000926394	0.000232975	0.00140634	0.00381286	0.00165971	0.000976795	0.00100961	0.00276806	0.00217601	0.00212381	0.003234	0.000800806	0.000374401	0.000243665	0.0029231	0.000941726	3.01169e-05	6.81106e-05	0.00243859	0.00030467	0.000275597	0.0176998	0.00114724	0.00700084	0.00342678	0.00436543	0.000557272	0.00191741	0.00010352	0.00019802	0.00304742
Cenarchaeaceae_Group	0.00201567	0	0.00255712	0	0.000114101	0	0	4.34226e-05	3.59557e-05	0	0	0	0	0	0	0.00988308	0.00436021	0.00458019	0.00351609	0.00109319	0.0166597	0.0041993	0.01174	0.0103159	0	0.000154562	0	0.00224874	0.00406916	0.00268149	0.00207169	5.62303e-05	0.000378437	0.0200776	3.01169e-05	0.000181628	0.00228618	0.00137998	0.00102522	3.0596e-05	0.00277424	0	0	0	0	0	0	0	0
SUP05_Group	0.000596639	0.00101404	0.00324452	0.00207952	0.00697648	0.00263083	0.00259614	0.0023014	0.00867731	0.000703158	0.00108305	0.000742619	0.000219832	0.000516196	0.000522686	0.00532362	0.00698625	0.0121211	0.00372663	0.00016129	0.00428662	0.00200948	0.00639477	0.00262067	0.000221152	0.00133485	2.75444e-05	0.00220709	0.000586385	0.00207481	0.000698882	0.000224921	0.00249246	0.00698761	0.000466811	4.54071e-05	0.00523281	0.00200724	0.00211659	0.0045894	0.00433867	0.00126096	0.00202387	0.00420747	0.000569938	0.00191741	3.88199e-05	0.000254597	0.000121897
Ruminococcaceae_Group	0.000112878	0.000706757	0.000164976	0.000219668	0	9.45209e-05	0.000101412	4.34226e-05	0	0.000156257	0.000123778	0.00224187	0.000376855	0	0.000435572	0.000127359	4.95479e-05	0.00015183	0.00172646	0.00150538	6.76123e-05	7.72877e-05	0.00112275	0.000285891	1.92306e-05	0.00148941	4.13166e-05	0.000145751	0.000213231	9.70674e-05	0.00501697	0.000337382	0	3.7669e-05	0.00466811	0.0125096	0.000304824	0.000878168	7.71673e-05	0	4.17179e-05	2.01753e-05	0.000114993	0	0.00117787	0	0.0014234	0.00104668	0
Mitochondria_Group	0.000548263	0.0002151	0.000989854	0.00765908	0.00205382	0.00436372	0.00525312	0.00138952	0.00203749	0.00454709	0.00454883	0.00353094	0.00431813	0.000338753	0.0012196	0	0.000396383	0.00118933	0.00136854	0.00188172	0.0013252	0.00133965	0.00087867	0.00050031	0.000461534	0.000238868	8.26332e-05	0.000874508	0.000142154	0.00132254	0.00249601	0.000374869	0.000221842	0.000357856	0.00898988	0.00594833	0.000457236	0.00521524	0.00130082	0.00105556	0.00479756	0.000595172	0.00128792	0.000717999	0.0229875	0.00364776	0.00342909	0.000551627	0.00140858
Parachlamydia	0.000112878	0.00010755	5.49919e-05	0	4.89006e-05	0	8.11293e-05	0	0	0	0.000123778	8.40701e-05	0.000235534	0	2.90381e-05	0	4.95479e-05	0	0.00018949	0.000143369	6.76123e-05	5.15251e-05	7.32225e-05	9.52971e-05	0	8.43064e-05	0	0.000229038	0.000426462	3.64003e-05	0.000349441	0.000243665	0.000104396	0	0.000466811	0.000363257	0	0.000125453	2.20478e-05	0	0.000187731	0	0	0	0	0	0	0	0.00690748
Pyrobaculum	0	0	0.000274959	0.000131801	0	9.45209e-05	0	0	2.39705e-05	0	0.00204233	8.40701e-05	0	0.00043554	0.000696915	0	0	0	4.21088e-05	0	9.46573e-05	7.72877e-05	0.000268483	0.00126269	0	0	0	0	0	7.28005e-05	0	0.00974659	3.91486e-05	0	0.00719793	0.000249739	0.000228618	0	0.000440956	3.0596e-05	0	0	0	0	0	0	0	0	0
Lentisphaera	0.000338633	0	0.000192472	0	0	0	4.05647e-05	0	0	0.000125006	6.18888e-05	4.20351e-05	3.14046e-05	0	0	0.000483965	4.95479e-05	0.000177134	0.000231598	0	0.00010818	0.000489489	0.000927485	0.00128651	0	0	0	0.000104108	0	8.49339e-05	0.000274561	5.62303e-05	0.000117446	7.53381e-05	0	0.000204332	0.00025402	0	0.000407884	0	6.25769e-05	2.01753e-05	0	0	7.59917e-05	0	5.17598e-05	0	0
Methylobacteriaceae_Group	0.00156416	0.0006453	0.00511425	0	0	0	0.000669317	0.000933585	0	3.12515e-05	0.000557	0.000924771	0.000266939	0	0	0	0.000322061	0.000708538	0.00141065	0.00503584	0.000919528	5.15251e-05	0	0.000857674	4.80765e-05	0.00106788	9.64055e-05	0	0.000924001	0.00107987	0	0.00468586	0	0.000282518	0.0102698	0.000158925	0.00104148	0.00360228	0.00171973	0	0	0	0	0	0	0	0	0	0
Pseudoxanthomonas	0.0022253	4.60929e-05	0.00395942	4.39335e-05	0	0	0.000770729	0.00245338	0.000155808	4.68772e-05	6.18888e-05	0.00364304	0.00912303	0	0.00149546	0	0.00106528	0.000657928	0.00271602	0.00517921	0.00117645	0.000515251	0	0.000524134	0.000278843	7.02553e-05	0.00692742	0	0.000924001	0.00197775	0	0.00238042	0	0.000489698	0.000963739	4.54071e-05	0.000838266	0.00161296	0.00169768	0	0	0	0	0	0	0	0	2.82885e-05	0
Olleya	8.0627e-05	0.000245829	5.49919e-05	2.9289e-05	3.26004e-05	0.000472605	0.000141976	0	2.39705e-05	0.00010938	0	0.000266222	0.000471069	0	0.000261343	0	4.95479e-05	0	0.000400034	0	0	5.15251e-05	0	0	9.61529e-05	0.000224817	8.26332e-05	0	0.000728539	0	0	0	3.91486e-05	0	0	6.81106e-05	5.0804e-05	0	2.20478e-05	0.00084139	0.00227363	0.00153332	0.0146961	0.00130676	0.000734586	0.00430248	0.000556418	0.00115983	0.0013815
Micromonas	0	0	5.49919e-05	0.00473018	0.00252653	0.00748291	0.00115609	0.000151979	0.00112661	0.00464084	0.00244461	0.00162536	9.42137e-05	0	0	0	0	0	0	0.000716846	0.000378629	0.000154575	4.8815e-05	0	0	4.21532e-05	0	0.000187395	0	0.000194135	4.99201e-05	7.49738e-05	5.21982e-05	0	0	0	0	0.000358436	0.000352765	0	0	0	0	0	0	0.000233831	0	0	0
Phaeobacter	0.000951398	0.000845036	0.000824878	0.00153767	4.89006e-05	0.00258357	0.000912705	0.00412514	0.000395513	0.00178133	0.00126872	0.00110692	0.00157023	0.00120983	0.000725953	5.09437e-05	0.000644122	0.000430184	0.000484251	0.00926523	0.00100066	0.000489489	0	0.000357364	0.000778839	0.00165803	0.00192811	6.24649e-05	0.00262985	0.000982807	0.000274561	0.00136827	0.000247941	0.000339021	0.000692688	0.000544885	0.000584246	0.00525108	0.00194021	0.00130033	0.000834359	0.00154341	0.00142591	0.00198168	0.00300167	0.00112239	0.00405021	0.00364922	0.00246502
HTCC	0.00430548	0.00219709	0.0125931	0.00336824	0.00808489	0.00319796	0.0037928	0.00336525	0.00721511	0.0058284	0.00965466	0.00795864	0.00656355	0.00709769	0.00207623	0.0137803	0.0070358	0.00845184	0.0054952	0.000860215	0.0113724	0.00886232	0.0194528	0.00678992	0.000894222	0.00276806	0.000661066	0.00674621	0.00636139	0.00455003	0.0138528	0.00110586	0.00490663	0.00657325	0.00168654	0.0194342	0.0102116	0.00396072	0.00510407	0.00335026	0.0114307	0.00283463	0.00328879	0.00472443	0.0024824	0.00799701	0.000828157	0.00104668	0.00357564
SAR324_Group	0.000451511	0	0.0212544	0	0.000358604	6.3014e-05	0.000141976	0.000195402	0.000167793	0.000718784	0	4.20351e-05	0	0	0	0.0396342	0.00379041	0.0164229	0.00292656	0.00207885	0.0309259	0.0392622	0.058456	0.0309954	0	0.0006604	0	0.028484	0.000195462	0.0245944	0.0348193	0.00356125	0.002897	0.00608355	0.00111432	0.00342823	0.0305332	0.0107531	0.0143641	0.00068841	0.0093031	0.000484208	0	0	0	0	6.46998e-05	0	0
Nocardioides	0.0289773	0.00445564	0.0256262	2.9289e-05	4.89006e-05	4.72605e-05	0.0102223	0.00102043	0.000335587	3.12515e-05	0.000216611	0.00367106	0.006171	6.45245e-05	0.0012922	0	0.011173	0.00316312	0.0347398	0.0391219	0.00807291	0.011284	0	0.00969648	0.00201921	0.00785454	0.00885553	0.000208216	0.0470885	0.00781392	4.99201e-05	0.0587982	5.21982e-05	0.00265567	0.0330683	0.00038596	0.0107958	0.0176171	0.0385947	0	0.000104295	0	0	0	0	0	0	0	2.70882e-05
Marinoscillum	0.000193505	0.0002151	0.00151228	0.00134729	0.00172782	0.00107124	0.000811293	0.00264878	0.00276859	0.00223448	0.00430127	0.00106489	0.000392557	0.00156472	0.00187296	0.00208869	0.000346835	0.0015436	0.000589523	7.16846e-05	0.00143338	0.00146847	0.00305094	0.00164387	0.000105768	0.000351277	0.000206583	0.00158244	0.00110169	0.00155308	0.00182208	0.000243665	0.000456734	0.00122424	9.03506e-05	9.08141e-05	0.000736658	0.000967777	0.000518123	0.00105556	0.000646628	0.000353068	0.00016099	0.00020104	0.000151983	9.35322e-05	0	0	0.000446955
Novosphingobium	0.0022253	0.000691393	0.00439935	2.9289e-05	3.26004e-05	7.87674e-05	0.0029815	0.00273562	7.19114e-05	3.12515e-05	6.18888e-05	0.00117698	0.00131899	8.06556e-05	0.000188748	0.000305662	0.000545027	0.000404879	0.00149486	0.00992832	0.00194724	0.000721352	0.00087867	0.00221566	0.000124999	0.00140511	0.000826332	0.000583005	0.00186577	0.00258442	0.00104832	0.00852827	0.000521982	0.000357856	0.00775509	0.00426826	0.0012193	0.00655937	0.00522533	0	0	0	0.00301281	2.872e-05	0.00112721	0.000280597	0.0056677	0.00842999	0.00299324
HTCC2207	0.00020963	0.00299604	0.000962358	0.0142052	0.0235049	0.00625414	0.0107091	0.00927072	0.0385325	0.0212197	0.0131514	0.0097101	0.0034231	0.00211318	0.0146497	0.00315851	0.00220488	0.040665	0.00202122	0.000143369	0.00300199	0.00177762	0.0009763	0.000643255	0.0033942	0.00175638	0.000881421	0.00795386	0.000995078	0.000339736	0.00267073	0.000993402	0.0100743	0.00787283	0.000150584	0.000544885	0.0107196	0.000340514	0.00065041	0.03696	0.0015227	0.0281446	0.016421	0.044401	0.0163129	0.00383482	0.000427019	0.00520509	0.00953503
Alteromonadaceae_Group	0.00119328	6.14571e-05	5.49919e-05	0.000541847	0.00133662	0.000236302	0.000223106	0.000542782	0.00173786	0.000718784	0.000464166	0.0015553	0.000643794	0.00103239	0.00150998	0.000585853	0.000247739	0.0010122	0.00223177	8.96057e-05	0.00010818	0.00115932	0.000414928	0.000762377	0.000759608	5.62042e-05	0.000330533	0.000624649	0.00179469	0	0.00169728	0.000131204	0.00112226	0.000395525	0.000391519	0.00165736	0.000660452	0.00019714	0.000176382	0.00139212	0.00481842	0.00673856	0.00372577	0.0015796	0.000709256	0.00313333	3.88199e-05	0	0.000148985
Massilia	0.000129003	0.00586916	0.000164976	0.00405653	0.00135292	0.00154384	0.00123722	0.00267049	0.000994774	0.00220323	0.00297066	0.00141518	0.00285782	0.00132275	0.00135027	0.000178303	0.000222965	0.00134116	0.000547415	0.00150538	0.000202837	0.000412201	0.000366113	0.000381188	0.000894222	0.00639323	0.000647294	0.000478897	7.1077e-05	0.000169868	0.000424321	0.000299895	0.000926518	0.000885222	0.000165643	0.000431367	0.000711256	0.000465967	0.000154335	0.00137682	0.00771782	0.000403506	0.000390975	0.000315919	0.000354628	0.00112239	0.000245859	0.000339463	0.000352146
Aquimonas	0.00309608	0.000184371	0.00456433	0	0	0	0.00101412	0.00330012	7.19114e-05	0.000140632	0	0.00409141	0.0108032	0	0.00184392	0	0.00158553	0.000910977	0.00313711	0.00655914	0.00154156	0.000772877	4.8815e-05	0.000905322	0.000423073	0.000196715	0.00891062	0	0.00126162	0.00230535	0.0001248	0.00335508	0	0.000941726	0.00194254	0.000158925	0.000838266	0.00247321	0.00242526	0	0	0	0	0	7.59917e-05	0	0.000219979	2.82885e-05	0.000121897
Dokdonella	0.00448286	0.00075285	0.00552668	2.9289e-05	0	0	0.00115609	0.0042337	0.000239705	0.000203135	0.000123778	0.00566072	0.0140535	0	0.00210526	0	0.00252694	0.0015436	0.00400034	0.00922939	0.00187962	0.00151999	9.763e-05	0.00214418	0.000663455	0.00133485	0.0111693	0	0.001386	0.00367643	0.000249601	0.00536062	0	0.000866388	0.00511987	0.00038596	0.00162573	0.00365605	0.00335127	0	0	0	0	0	0.000227975	0	0.000672878	0.000594059	0.000474043
Ilumatobacter	0.00109653	0.00508558	0.00384943	0.000497913	4.89006e-05	0.0107596	0.00338715	0.000738184	0.000383527	0.000390643	0	0.0129888	0.0114784	8.06556e-05	0.000232305	0.000101887	0.000594575	0.000506098	0.000905339	0.0137455	0.00129816	0.000644064	4.8815e-05	0.00083385	1.92306e-05	0.0085571	0.000661066	0.00012493	0.000515308	0.00197775	0.000374401	0.00247413	0.000234892	0.000169511	0.00120467	0.000862734	0.0012955	0.0090505	0.00413396	3.0596e-05	0	0	0	0	2.53306e-05	0	0.000284679	0.00834512	0
HB2_32_21	0.000935273	0.000384107	8.24878e-05	2.9289e-05	6.52007e-05	0.000157535	0.000283953	0.000325669	5.99262e-05	0	0.000123778	0.00025221	0.000502473	0.000129049	0	0.000254719	0.000396383	0.000177134	0.000210544	0.00123656	0.00016227	0.000360676	0.00029289	0.00033354	1.92306e-05	0.000379379	0	0.000249859	0.000266539	0.000230535	0.000923522	0.000955915	0.000130495	3.7669e-05	0.00280087	0.00199791	7.6206e-05	0.00120076	0.000429932	3.0596e-05	0	0	0	0.00011488	8.8657e-05	0.000280597	0	0	4.06322e-05
Oceanibaculum	0.000467636	0.000553114	0.000329951	2.9289e-05	0.000260803	0	0.000669317	0.000694761	0	4.68772e-05	0.00129967	2.80234e-05	7.85114e-05	3.22622e-05	7.25953e-05	0.00119718	9.90958e-05	0.000126525	0.00018949	0.000555556	0.000202837	5.15251e-05	0.000536965	0.00033354	0	0.00092737	0	0.0020197	5.33077e-05	0.000145601	0.0016224	0.00059979	0.00232282	0.000263683	0.00224371	0.00349634	0.000228618	0.000609341	0.000242526	0	8.34359e-05	6.0526e-05	6.89957e-05	0	0.000443285	0	0.000349379	0.000693069	0.00339956
Verrucomicrobiaceae_Group	3.22508e-05	0	0.000164976	0	4.89006e-05	0.0018274	4.05647e-05	0.000455937	0	6.25029e-05	0	0.000126105	0.000502473	0	0	0.000203775	9.90958e-05	5.06098e-05	0.000147381	0.000555556	0.00010818	0.000180338	0	7.14728e-05	0	0.000112408	0	0	0.000159923	0.000448937	0	0.000206178	0	7.53381e-05	0.000511987	0	0.000101608	0.000322592	0.000176382	0	0	0	0	0	0	0	0.000168219	0	2.70882e-05
Luminiphilus	3.22508e-05	0.00241219	0	0.00203559	0.000423805	0.000126028	0.000324517	8.68451e-05	0.000371542	0.0069222	0.00133061	0.000630526	0.000565282	0.000467802	0.00092922	0	0	0.000227744	0.000231598	3.58423e-05	2.70449e-05	0.000386439	7.32225e-05	0	0.000576918	0.00223412	0.000110178	0.000104108	0.000195462	8.49339e-05	0.00014976	3.74869e-05	0.000156595	0.00079105	0	6.81106e-05	0.000101608	3.58436e-05	0	0.000413046	4.17179e-05	0.000312718	6.89957e-05	0.00017232	7.59917e-05	0.000467661	0	0	0.000121897
Parvibaculum	0.0103364	0.000937222	0.010366	0	0.000749808	4.72605e-05	0.00227162	0.00527584	0.000359557	6.25029e-05	0.00188761	0.000448374	0.00075371	0.000177442	0.000188748	0.00193586	0.00448408	0.00227744	0.00282129	0.00360215	0.00540899	0.000644064	0.000512558	0.00583695	0.000269228	0.00125054	0.000454483	0.00401857	0.00186577	0.00617591	0.00237121	0.0069913	0.00230977	0.00192112	0.00361402	0.00442719	0.0051566	0.00695365	0.0123468	7.649e-05	0.000146013	7.06136e-05	0.000528967	0.000344639	6.33264e-05	0.000187064	7.76398e-05	0.000240453	0.000419866
Planomicrobium	4.83762e-05	0	0	0	0	3.1507e-05	0	0	0.000155808	0	0	0	0	0	0	0	0.000743218	0	0.00107377	0.000394265	0	0	0	0	0	5.62042e-05	4.13166e-05	0	0	0	0	0	0	0	0	0	0	0	0.000948055	0	0	0	0	0	0	0	0	0	0
Moheibacter	0	0	5.49919e-05	0.00847917	0	0	0	0	0	0	0	0	0	0	0	0	0	5.06098e-05	0	0	0	0.00010305	0	0	0	0	0	0	0	0	0	0	0	0	0	0	0	0	0	0	0	0	0	0	2.53306e-05	0	0	2.82885e-05	0
Marinicella	0.00062889	0.000906493	0.00087987	0.00103976	0.00599847	0.000819181	0.00156174	0.00351723	0.00165396	0.00126568	0.00522961	0.000868725	0.00265369	0.0023874	0.00124864	0.00137548	0.00138734	0.0111595	0.00242126	0.000573477	0.00370516	0.00100474	0.00148886	0.000976795	0.00049038	0.0012646	0.000785016	0.0015408	0.000497539	0.00172295	0.001248	0.000506073	0.00172254	0.00549968	0.000361402	0.000612996	0.00416593	0.000734793	0.000870888	0.00125444	0.000479756	0.000342981	0.00301281	0.00656251	0.00045595	0.00790347	0.000504658	0.000848656	0.00029797
SC3_41_Group	9.67523e-05	0	0	0	6.52007e-05	0.0130911	0.000304235	0.000238824	2.39705e-05	0	0	0.000126105	0.000141321	0	0	5.09437e-05	0	0	4.21088e-05	8.96057e-05	0.000419196	0.000541014	0.000414928	0.00016677	0	0	0	8.32865e-05	0	0.000109201	9.98403e-05	5.62303e-05	6.52477e-05	3.7669e-05	0	0	0.000101608	3.58436e-05	2.20478e-05	0	0	0	0	0	0	0	0	0	0
Marinobacter	0.0019673	0.000199736	0.00140229	0.000556491	0.009014	0.000267809	0.000851858	0.000694761	0.000107867	0.00032814	0.000216611	0.000518432	0.000298343	0.00345206	0.000203267	0.00646985	0.00205624	0.000404879	0.00208439	0.000609319	0.000730213	0.00247321	0.00236753	0.000524134	0.000605763	0.000590145	0.000674838	0.0167614	0.000870693	0.000982807	0.0136282	0.000449843	0.0101265	0.000659208	0.000873389	0.0233846	0.000736658	0.000519732	0.000727577	0.0007649	0.0126197	0.00211841	0.00110393	0.000904678	0.0018238	0.00187064	0.00289855	0.00137199	0.00195035
Syntrophomonas	0.000129003	0.00010755	5.49919e-05	0	0	0	0	0	0	0	9.28333e-05	8.40701e-05	3.14046e-05	6.45245e-05	0	0	0	0	0.000168435	8.96057e-05	2.70449e-05	0	0	0	0.000759608	0.000590145	0	0	0.000124385	7.28005e-05	0	0	0	0	0	0	0	8.96089e-05	8.81912e-05	0	0	0	0	0	3.79958e-05	0	0	0	0
Opitutus	0.00151579	0.000338014	0.00258462	0.000190379	3.26004e-05	0.000645893	0	0.000260535	7.19114e-05	9.37544e-05	0.000587944	0.000210175	3.14046e-05	0.000161311	0.000116152	0.000127359	0.00069367	0.000177134	0.000442142	0.000250896	0.000243404	0.00139118	0.00029289	0.00104827	0.000365381	0.000365328	6.8861e-05	4.16432e-05	0.000159923	0.000897873	0.000249601	0.000431099	5.21982e-05	0.000226014	0.00117456	0.000158925	0.000914472	0.000681028	0.00039686	7.649e-05	0.000229449	8.07013e-05	0.000229986	7.17999e-05	0.000291301	0.000374129	0.000504658	0.00019802	0.00228895
Moraxellaceae_Group	0.00509562	0.000138279	0.000907366	0.00158161	0.000179302	0.000189042	0.00060847	0.000369092	0.000155808	0.000281263	0.000371333	0.000882736	0.000565282	0.00151632	0.000290381	0.000229247	0.00354267	0.000480794	0.00208439	3.58423e-05	0.000527376	0.00226711	0.000414928	0.00288274	0.000384612	0.000281021	0.000110178	0.000416432	0.00195462	0.00107987	0.000873602	0.00164942	0.000234892	0.0010924	0.0073184	0.00261091	0.00139711	0.00118284	0.00148823	0.000168278	0.00104295	0.00186622	0.000229986	0.0001436	0.00246973	0.00084179	0.00262681	0.000509194	0.00177427
Oleispira	0	0	0	0.00445193	0.000179302	0	0	0.00017369	0	0.000125006	0	2.80234e-05	7.85114e-05	0.000629113	0.000101633	0.000738684	0	0.000126525	6.31632e-05	3.58423e-05	2.70449e-05	0.000154575	0.0012936	7.14728e-05	4.80765e-05	0	2.75444e-05	0.0007704	0	0	0.00224641	0	0.000548081	0	0	0.00170277	5.0804e-05	0.000394279	0	0.0015145	0.0162074	0.00807013	0.00335779	0.000545679	0.00262171	0.000374129	0	0.000113154	5.41763e-05
Defluviimonas	0.000258006	0.000138279	0.000192472	0	3.26004e-05	0.000535619	0.000405647	0.00067305	4.79409e-05	0	0	0.000182152	0.000251237	0	8.71143e-05	0	7.43218e-05	5.06098e-05	0.000147381	0.00191756	0.000202837	0.000128813	0	0.000142946	7.69223e-05	0.000323174	0.000179039	4.16432e-05	0.000355385	0.000776539	0.000224641	0.000730994	0	0	0.000933622	9.08141e-05	7.6206e-05	0.0015592	0.000429932	4.5894e-05	8.34359e-05	0.000121052	6.89957e-05	0.00012924	0.000924566	0	0.00736284	0.00708628	0.00386006
Magnetospira	0.00237043	0.00141351	0.00596662	0.000966537	0.00184192	0.000551372	0.0012575	0.00321327	0.00182176	0.000734409	0.0019495	0.00152727	0.000832221	0.00803329	0.00156806	0.00280191	0.00168463	0.00625032	0.000357925	0.000215054	0.0014469	0.0014427	0.0055405	0.00202506	0.000711532	0.000941421	0.000977827	0.00406022	0	0.00269362	0.00938498	0.000955915	0.00262296	0.00188345	0.000692688	0.017232	0.00353088	0.00254489	0.00318591	0.000780198	0.00118896	0.000282455	0.000666958	7.17999e-05	2.53306e-05	0.000748258	6.46998e-05	0.000806223	0.000230249
hgcI	0.00020963	0	5.49919e-05	0.000219668	0.000603107	0.000393837	0.00498945	0.000738184	0.000371542	0.000296889	0.000402278	0.0128067	0.00295203	0	0.000101633	0	0	0	8.42176e-05	0.00159498	4.05674e-05	5.15251e-05	0	0.00016677	0	0.000112408	5.50888e-05	0.000145751	0.000124385	8.49339e-05	0	0.000449843	0.000260991	0	3.01169e-05	4.54071e-05	0	0.000842324	0.000297645	0	0	0	0	0	0	9.35322e-05	2.58799e-05	8.48656e-05	0
Actibacter	0	6.14571e-05	0	2.9289e-05	3.26004e-05	0.000173288	0	0	7.19114e-05	4.68772e-05	0	7.00584e-05	9.42137e-05	0.000112918	0.000130672	0	0	0	0	0	0	0	0	0	1.92306e-05	7.02553e-05	2.75444e-05	0.000166573	0	0	0	0	0	0	0	4.54071e-05	0	0.000143374	2.20478e-05	0.000275364	0	0.000161403	0	0.0001436	2.53306e-05	0.000140298	0	0	0.000135441
Altererythrobacter	0.00346696	0.0038718	0.00280459	0.00316321	0.00405875	0.000519865	0.00490832	0.00466793	0.00477012	0.0031564	0.00430127	0.00305455	0.00920154	0.00230675	0.00249728	0.00478871	0.00413725	0.00232805	0.0038319	0.00775986	0.00397561	0.00211253	0.00527202	0.0042169	0.00128845	0.00296477	0.00220355	0.00508048	0.00607708	0.00343376	0.00728834	0.00719748	0.00679882	0.00350322	0.00399048	0.0127821	0.00317525	0.00525108	0.00594188	0.00452821	0.000938654	0.00297586	0.00443872	0.00518395	0.00158316	0.00135622	0.00452899	0.00524752	0.0031964
Alishewanella	9.67523e-05	0	0	0.00103976	0.000195602	0	0.000405647	0.000412514	4.79409e-05	0	0.000402278	0	6.28091e-05	0.000951736	8.71143e-05	5.09437e-05	0.00012387	0	0	3.58423e-05	9.46573e-05	0	9.763e-05	0.000738552	4.80765e-05	5.62042e-05	2.75444e-05	0.000166573	0	0.000218402	0.000524161	0.000299895	5.21982e-05	0.000113007	0.000798097	0.000681106	5.0804e-05	0.000394279	0.00019843	0	0	4.03506e-05	0.00016099	0	0.00141851	0	0.000491718	0.000226308	0.00250565
Dyadobacter	0.000129003	0.000122914	5.49919e-05	5.8578e-05	0	0	0.000182541	0.000238824	0	0	0	0.000154129	0.000109916	4.83933e-05	0	0	0	0	0	0.000663082	6.76123e-05	0.00010305	0	9.52971e-05	0	0.00012646	8.26332e-05	0	8.88462e-05	0.000182001	0	0.000449843	0	0	0.00028611	0	0	0.000286749	0.000319693	0	0	0	0	0	6.33264e-05	0	7.76398e-05	0	0.00918289
Aestuariibacter	0	6.14571e-05	0	0	0	0	0	4.34226e-05	0	0	0	0	0	0	4.35572e-05	0	0	0	4.21088e-05	0	0	0	0	0	2.88459e-05	0	6.8861e-05	0	0	0	0	0	2.60991e-05	0	0	0	0	0	0	0	0	5.04383e-05	4.59971e-05	0.000315919	0	0	0	0	0
Kiloniella	0.00133841	0.000199736	0.00184223	4.39335e-05	0	0	0.000669317	0.000998719	0.000155808	0	0	0.000322269	0.000235534	0	8.71143e-05	0.000101887	0.000668896	0.000379574	0.000294762	0.00412186	0.0014469	0.000360676	0	0.00104827	0.000115384	0.000449634	0.00139099	8.32865e-05	0.000515308	0.00194135	0.0001248	0.00318638	3.91486e-05	0.000150676	0.00155102	0.000136221	0.0013209	0.00372773	0.00268983	0	0.000146013	2.01753e-05	0.000873945	0.00011488	0.000683925	0.000327363	0.00295031	0.00528996	0.00166592
Fritschea	0	0.000122914	8.24878e-05	0	0	0	0.000304235	0	0	0	0	2.80234e-05	0	0	0	0.000101887	0	0	0	3.58423e-05	0	0.000154575	7.32225e-05	0.000619431	0	7.02553e-05	0	0	3.55385e-05	9.70674e-05	7.48802e-05	0.000449843	0	0	0.000165643	0.000158925	0	0.000179218	3.30717e-05	0	0	0	4.59971e-05	0	0	0	0	0	0
Idiomarina	0.000290257	7.68214e-05	0.000852374	0.000439335	0.000374904	0	8.11293e-05	8.68451e-05	8.38966e-05	6.25029e-05	0	2.80234e-05	6.28091e-05	0.000967867	0.000493648	5.09437e-05	0.000148644	0.000177134	0.00168435	0	5.40899e-05	0.000644064	0.000122038	0.000786201	6.7307e-05	0.000196715	9.64055e-05	4.16432e-05	0.00103062	0.000376136	0.000599042	0.000431099	5.21982e-05	7.53381e-05	0.000496928	0.000227035	0.000914472	0.000394279	0.00255754	0.000397748	0.003254	0.00090789	0.00117293	0.000430799	0.00249506	0.00107562	0.00403727	0.00510608	0.00493004
nsmpVI18	8.0627e-05	0	0.00013748	0.000893315	0.00189082	0.000283563	0.000365082	0.000694761	0.00228918	0.000687532	6.18888e-05	0.000434362	0.000235534	0.000112918	8.71143e-05	0.000611325	0	0.00139177	0.000400034	0	0	0.000463726	0.00039052	7.14728e-05	8.65376e-05	0	5.50888e-05	0.000999438	0.000142154	6.06671e-05	0.00102336	5.62303e-05	0.0015529	5.65036e-05	7.52921e-05	0.0019298	0.000457236	7.16872e-05	0.000209454	0.00116265	0.0015227	0.00144254	0.00172489	0.00112008	0.000607934	0.000140298	0	0	8.12645e-05
C1_B045	0.00159641	0.000261193	0.00145729	0.000102512	8.15009e-05	0.000441098	0.000791011	0.00371263	9.58819e-05	7.81287e-05	0.000557	0.00211576	0.000863626	0.000161311	0.000130672	0.000178303	0.00138734	0.000683233	0.00204228	0.00587814	0.000838393	0.000721352	4.8815e-05	0.00197741	0.000115384	0.000814962	0.000509572	4.16432e-05	0.000266539	0.00145601	0.000549121	0.0017244	0.000169644	0.000489698	0.00162631	0.000522181	0.000863668	0.0029571	0.00111341	3.0596e-05	6.25769e-05	7.06136e-05	4.59971e-05	8.61599e-05	7.59917e-05	0	5.17598e-05	2.82885e-05	0
Flammeovirgaceae_Group	0.00604702	0	0.000824878	0.000190379	3.26004e-05	3.1507e-05	0.000182541	0.000260535	0.00025169	0.000140632	0.000216611	0.000798666	0.00034545	3.22622e-05	0.00092922	0.000305662	0.00163508	0.000910977	0.00145275	0.000250896	0.00098714	0.000592539	0.000219668	0.00100062	9.61529e-05	4.21532e-05	0.000302989	0.000520541	0.00382039	0.000509604	0.000823682	0.000262408	0	0.0020718	6.02337e-05	0.000136221	0.00350547	0.000215061	0.000683482	0.00022947	0.000479756	8.07013e-05	9.19942e-05	4.30799e-05	6.33264e-05	0	0	0	6.77204e-05
Vibrio	0.000999774	0.000276557	0.000824878	0.00219668	0.00107581	6.3014e-05	4.05647e-05	0.00217113	0.000347572	0.000203135	0.00349672	0.000224187	0.000188427	0.00130662	0.00309256	0	0.00104051	0.000657928	0.000968503	0.00100358	0.000365107	0.00162304	0	0.000381188	0.00285574	0.000210766	0.0030712	0.000291503	0.000550847	0.000764405	0.000599042	0.000168691	0.000182694	0.000395525	0.00048187	0.000998956	0.00144791	0.000914011	0.00090396	0.000275364	0.00183559	0.00112982	0.00126492	0.000502599	0.00493946	0.000280597	0.00455487	0.00190948	0.00178782
Marinovum	6.45016e-05	0.000153643	0	2.9289e-05	6.52007e-05	7.87674e-05	0	0.000303958	5.99262e-05	4.68772e-05	0	4.20351e-05	4.71069e-05	6.45245e-05	4.35572e-05	0	0	0	0	0.000591398	0	0	0	0	5.76918e-05	0.00012646	4.13166e-05	4.16432e-05	0.000124385	8.49339e-05	4.99201e-05	0.000112461	2.60991e-05	5.65036e-05	6.02337e-05	0.000136221	7.6206e-05	0.000322592	0.000154335	0.00015298	0	9.0789e-05	4.59971e-05	0.00011488	0.000139318	0.000187064	0.00014234	0.000183876	0.000162529
NS10	0.00151579	0.000307286	0.00140229	0.000234312	0.000619407	0.000409591	4.05647e-05	0.000325669	5.99262e-05	0.000296889	0.00157817	0.000658549	0.000832221	0.000564589	0.00015971	0.000866043	7.43218e-05	0.000531403	0.000210544	0	0.00093305	0.00010305	9.763e-05	0.000142946	2.88459e-05	0.000309123	6.8861e-05	0.00176984	0.000693001	0.000861473	7.48802e-05	9.37172e-05	0.0014746	0.000357856	0.000301169	0.000272442	0.00109229	0	0.000992151	0.000397748	0.00333744	6.0526e-05	0.000183988	0.00159396	0.000151983	0.00425572	0	0.000183876	8.12645e-05
Pseudoxanthobacter	0.000435386	0.000291921	0.000934862	0	0	0	0.000527341	0	0	0	0.0002785	5.60467e-05	0	0	2.90381e-05	0	0.000297287	7.59148e-05	0.000252653	0.00105735	0.000365107	0	0	0.00133416	0	0.000688502	0.000137722	0	0.000248769	0.000327602	0	0.00487329	0	0	0.00346344	0	0.000304824	0.00127245	0.000639386	4.5894e-05	0	0	0	0	0	0	0	0	2.70882e-05
Thalassobaculum	0.00103203	0.000629936	0.00074239	0	3.26004e-05	0	0.000649035	0.000412514	0	0	0.0041775	5.60467e-05	0.000125618	0.000419409	0.000217786	0.000534909	0.000594575	0.000278354	0.000147381	0.000430108	0.000608511	0.000437964	0.000244075	0.000786201	0	0.00123649	0	0.000416432	0.000355385	0.000242668	0.000748802	0.00103089	0.000247941	0.000131842	0.00435189	0.00131681	0.000838266	0.000681028	0.00045198	0	0	0	0	0	0.000253306	0	2.58799e-05	8.48656e-05	0.00112416
Cenarchaeum	0.000983649	0	0.0020622	0	3.26004e-05	0	0	8.68451e-05	0	0	0.000123778	0	0	0	0	0.00364248	0.00282423	0.00369452	0.00160013	0.000286738	0.0040297	0.00280812	0.00331942	0.00269214	0	0	0	0.00168655	0.00113723	0.00167441	0.00117312	0.000149948	0.000639428	0.0063849	0.000165643	0.000363257	0.00320065	0.000788559	0.000562219	0	0.001627	3.0263e-05	0	0	0	9.35322e-05	0	0	0
NS11_12_Group	0.000790144	0.00010755	0.000494927	0	3.26004e-05	0.00770346	0.000223106	0.000325669	0	0	0	0.00267623	0.00146031	0.00100013	0.000362976	0.000229247	0	5.06098e-05	0.000357925	7.16846e-05	0.000189315	5.15251e-05	9.763e-05	0.000405013	6.7307e-05	0.000224817	4.13166e-05	4.16432e-05	0.00156369	0.000121334	0.000249601	0.000693507	0.000117446	0	4.51753e-05	0.000681106	0.00063505	0.000161296	0.000264574	3.0596e-05	0.000229449	4.03506e-05	4.59971e-05	0.00024412	0.000227975	0.00215124	0	0	0
Brevundimonas	0.00541813	0.0006453	0.00423438	0.000366113	0	4.72605e-05	0.00198767	0.00319156	0.00025169	0.00010938	0	0.0033628	0.0054801	0.000225836	0.000406534	0.000127359	0.00193237	0.000582013	0.00915867	0.00935484	0.00169031	0.0103308	0	0.00209654	0.00103845	0.00140511	0.00185925	4.16432e-05	0.00906232	0.00158948	0.000224641	0.00901559	0.000169644	0.00058387	0.00453259	0.000408664	0.00167653	0.0047672	0.00460799	0.000183576	0.00020859	6.0526e-05	0.00032198	5.74399e-05	0.00159583	0.000935322	0.0153339	0.0238614	0.0126637
Hahella	0.000967523	0.000399471	0.000522423	0.000673647	0.000994311	0.000409591	0.000750446	0.000738184	0.000910878	0.000250012	0.000309444	0.000672561	0.000376855	0.000274229	0.00015971	0.000611325	0.000792766	0.000480794	0.000863231	0.000681004	0.000351584	0.000386439	0.000366113	0.00033354	0.000230767	0.000604196	0.000261672	0.000999438	0.000817385	0.000266935	0.00122304	0.000787224	0.000782973	0.000282518	0.000722804	0.000908141	0.00063505	0.000681028	0.000319693	0.00145331	0.00337915	0.00462015	0.00236885	0.00149344	0.00184913	0.00149652	0.00166925	0.000608204	0.000948086
AEGEAN_185_Group	4.83762e-05	0	0.0103385	0	0	7.87674e-05	0	0	0	0.000156257	0	0.000224187	0	0	2.90381e-05	0.0198171	0.00218011	0.00483324	0.00145275	0.000322581	0.015632	0.0167972	0.0247736	0.0134845	0	9.83574e-05	0	0.0114519	0.000124385	0.0135773	0.0141274	0.000918429	0.00202268	0.00259916	0.00118962	0.00569859	0.0129804	0.0037815	0.00501587	9.1788e-05	0.00423437	0.000191666	0	5.74399e-05	3.79958e-05	0.000140298	0	0	0
ZD0117	0.000193505	0.00173616	5.49919e-05	0.00247492	0.000260803	0.000126028	0.000182541	0.000108556	0.00027566	0.00984421	0.00244461	0.000672561	0.000879328	0.000403278	0.000246824	0.000101887	0.000198192	0.000126525	8.42176e-05	3.58423e-05	8.11348e-05	0.000850165	7.32225e-05	0.000142946	0.000221152	0.00213576	6.8861e-05	0	0.000177692	3.64003e-05	0.000299521	9.37172e-05	0	0.000113007	4.51753e-05	9.08141e-05	0	3.58436e-05	4.40956e-05	0.000122384	0.000438038	6.0526e-05	9.19942e-05	0.00017232	0.000101322	0.000795024	0	8.48656e-05	0.000176073
Acinetobacter	0.0139162	0.0235074	0.00439935	0.00146445	0	0.000850688	0.00861999	0.00510215	0.00147418	0.000125006	0.001114	0.00204571	0.0108817	0	0.00015971	5.09437e-05	0.00805153	0.00167013	0.0206544	0.0239247	0.000622034	0.0141179	0.000366113	0.0091247	0.00127883	0.0585508	0.000137722	4.16432e-05	0.0189953	0.00178361	0.0013728	0.0523879	0	0.00274984	0.0605801	0.000885438	0.00586786	0.0126886	0.00265676	6.1192e-05	0.000146013	0.00017149	0.000252984	4.30799e-05	0.00492679	0.000140298	0.00737578	0.00254597	0.000920997
OM43	0.000790144	0.0140583	0.000934862	0.00414439	0.00624297	0.00225275	0.00492861	0.00720815	0.00515365	0.015282	0.00980938	0.00451176	0.00946848	0.00353271	0.0037314	0.00185945	0.00094141	0.0071866	0.00115799	0.000286738	0.000851915	0.00159728	0.00139123	0.00150093	0.00238459	0.0139808	0.00278199	0.00254024	0.000142154	0.00121334	0.00182208	0.000449843	0.00473699	0.00352206	9.03506e-05	9.08141e-05	0.00220997	0.000537654	0.000562219	0.00489536	0.000333744	0.00142236	0.00147191	0.00188116	0.00043062	0.0028995	0	0.00192362	0.0013815
Aquibacter	0.000322508	0.00331869	0.000302455	0.000322179	0.000554206	0.00390687	0.000932987	0.000195402	0.000263675	0.00100005	6.18888e-05	0.00176547	0.00218262	0.00125823	0.00127768	0.000254719	0.000173418	0.00111342	0.00018949	0.00016129	0.000283972	0.000231863	4.8815e-05	9.52971e-05	0.000499995	0.00238868	0.00139099	0.000270681	0.00131492	0.000315469	0	0.000131204	0.000456734	0.000150676	0.000135526	0.000249739	0.000736658	0.000519732	0.000804745	0.00215702	0.000563192	0.00186622	0.00181689	0.00109136	0.000582603	0.00177711	0.000194099	0.000339463	0.00151694
Rubellimicrobium	0.000467636	0.00032265	0.000109984	0	0	0	0.00026367	0.000108556	0.000191764	3.12515e-05	0	0.000378316	0.00114627	0	0.000711434	0	0.00012387	0	0.000126326	0.000304659	0	0.000206101	0	0	0.000740377	0	0.000881421	8.32865e-05	0.00677008	7.28005e-05	0	0.000262408	2.60991e-05	0.000150676	4.51753e-05	0	0	0	0.000782697	4.5894e-05	0	0	0	0	0	0	2.58799e-05	2.82885e-05	0
MB11C04	6.45016e-05	0.00869619	0.00087987	0.000102512	0.000114101	0.000472605	0.000324517	0.00017369	7.19114e-05	3.12515e-05	0.00368239	0.000700584	0.00221402	0.00120983	0.00168421	0.00234341	0.000594575	0.00589605	0.000673741	3.58423e-05	0.00196076	0.00108203	0.00165971	0.000524134	0.00157691	0.00709579	6.8861e-05	0.000187395	0	0.000582404	0.000324481	0	6.52477e-05	0.00248616	0	0.000227035	0.00492799	0.000161296	5.51195e-05	6.1192e-05	0.000312885	8.07013e-05	0	4.30799e-05	3.79958e-05	0.000748258	3.88199e-05	2.82885e-05	4.06322e-05
Panacagrimonas	0	3.07286e-05	5.49919e-05	0	0	0	0	0	0	0.000187509	0	0.000126105	7.85114e-05	0.000112918	0	0	7.43218e-05	0	6.31632e-05	0	0	0.000231863	0	4.76485e-05	0	0	0	0	0	0	0	0	0	0	0	4.54071e-05	0	0	0	0	0	0	0	2.872e-05	0	0	0	0	0
SargSea_WGS	0.000258006	4.60929e-05	0.00717644	0	0.000163002	3.1507e-05	0	0	4.79409e-05	6.25029e-05	0	0.000378316	0	0	2.90381e-05	0.00853308	0.00245262	0.00354269	0.00170541	0.000322581	0.00690998	0.00489489	0.012399	0.00988707	0	0.000252919	0	0.00470569	0.000213231	0.00764405	0.00866114	0.000524816	0.000822122	0.00446378	0.000361402	0.00429097	0.0064267	0.00399656	0.0040568	0	0.00698776	0.000141227	0	0	0	0.000187064	0	0	0
Chlamydophila	0	0	0	2.9289e-05	0.000163002	0	0.000101412	6.51339e-05	3.59557e-05	0	6.18888e-05	2.80234e-05	0	0	0	0.000101887	0.000173418	0.000177134	6.31632e-05	0.000107527	0.00010818	0	0.00019526	7.14728e-05	0	0	0	0.000104108	7.1077e-05	2.42668e-05	7.48802e-05	3.74869e-05	3.91486e-05	0.000188345	4.51753e-05	9.08141e-05	7.6206e-05	3.58436e-05	4.40956e-05	0.000122384	4.17179e-05	2.01753e-05	0	4.30799e-05	0	0	0	0	0
Sphingomonadaceae_Group	0.00127391	0.000276557	0.00107234	0.000146445	0.000195602	0.000157535	0.000567905	0.000651339	7.19114e-05	0.000203135	0	0.000644538	0.00216692	0.000193573	0.000101633	0.000585853	0.000470705	0.000253049	0.000905339	0.00250896	0.000743736	0.000180338	0.000366113	0.00083385	8.65376e-05	0.000295072	0.000853877	0.000395611	0.00111946	0.000873606	0.00102336	0.00219298	0.000221842	0.000546201	0.00164137	0.00217954	0.000177814	0.00220438	0.0017087	0.000107086	0.000479756	9.0789e-05	0.000413974	0	0.00110188	0	0.0145316	0.0119519	0.00520093
Pseudospirillum	0.00117715	0.000138279	0.00167725	0.00244563	0.00149962	6.3014e-05	0.00026367	0.00208428	0.000731099	0.000421895	0.000371333	0.00113495	0.000455366	0.00108078	0.000188748	0.00323493	0.00104051	0.000531403	0.000926394	0.00148746	0.00098714	0.00126237	0.00234312	0.00135798	0.000403842	0.000224817	0.000633522	0.00416432	0.000266539	0.000825072	0.00526657	0.000843455	0.00395401	0.000470863	0.000617395	0.00803705	0.00190515	0.00112907	0.0012898	0.000336556	0.000146013	0.000342981	0.000183988	0.000430799	0.00138052	0	0.00335145	0.000735502	0.000528219
Coxiella	0.00149966	0.00032265	0.000989854	0.000102512	0.000407505	0.000236302	0.000993834	0.000434226	0.000299631	0.000375018	0.000340389	0.000434362	0.000486771	0.00087108	0.000406534	0.000764156	0.000520253	0.000556708	0.00128432	0.00227599	0.00109532	0.000669827	0.00087867	0.00066708	0	0.000800911	0.000151494	0.00120765	0.00131492	0.000970674	0.00197185	0.00359874	0.000743824	0.000282518	0.00283098	0.00133951	0.00114309	0.0012366	0.00084884	0.000137682	0.000521474	0.000141227	0	0	0.000316632	0.00434925	0.00010352	0.000183876	6.77204e-05
AEGEAN_112_Group	0	0.00102941	0	0.000117156	0.000130401	3.1507e-05	6.0847e-05	4.34226e-05	4.79409e-05	0.000125006	0.000216611	5.60467e-05	0	0.00058072	0.00046461	0	0	5.06098e-05	0.00018949	0	0	0	0	0	9.61529e-05	0.000983574	8.26332e-05	4.16432e-05	0	0	0	0	7.82973e-05	0.000113007	0	0	0	3.58436e-05	0	3.0596e-05	0	3.0263e-05	0	0.0001436	2.53306e-05	0.000561193	0	0	0
Salinisphaera	0	0	0	4.39335e-05	0	0	0.000101412	0	0	0	0	0.000238199	0.000125618	0	8.71143e-05	5.09437e-05	9.90958e-05	0	0.00018949	0	2.70449e-05	0.000231863	4.8815e-05	0.000238243	0	0	0	0	7.1077e-05	8.49339e-05	0	0.0017244	0	0	0.000255993	0.000408664	0	0	7.71673e-05	0	8.34359e-05	0	0	0	0	0	0	0	0
BD2_13	0.000274132	0.000445564	0	0.000483269	9.78011e-05	0	8.11293e-05	0	2.39705e-05	0.00010938	0.000154722	0.000826689	0.000266939	0.000274229	0.000232305	0.00157926	4.95479e-05	0.00108811	0.000357925	0.000197133	0.00400265	7.72877e-05	0.00173293	0.000381188	0.000124999	0.000491787	9.64055e-05	6.24649e-05	0.000355385	3.64003e-05	9.98403e-05	7.49738e-05	3.91486e-05	0.000113007	0	0.000136221	0.000304824	5.37654e-05	8.81912e-05	0.00022947	0.000709205	0.000191666	0.000298981	0.00020104	0.000113988	0	2.58799e-05	0.000169731	0.000230249
Denitromonas	0	0	0	0	0	0	0	0	0	0	0	0	0	0.00151632	0	5.09437e-05	0	0	0	0	0	0	0.000854263	0	0	4.21532e-05	0	0.000333146	0	0	0.00409345	0	0.000169644	0	0	0.00731054	0	0	0	0	0	0	0	0	0	0	0	0	0
Candidatus_Protochlamydia	0	0	5.49919e-05	0	0	3.1507e-05	0	0	0	0	0	0	0	0	0	0	0	0	4.21088e-05	7.16846e-05	0	5.15251e-05	0	0	0	0	0	4.16432e-05	7.1077e-05	0	0	0.000112461	0	0	0.000150584	0	0	3.58436e-05	6.61434e-05	0	0.000125154	0	0	0	0	0	0	0	2.70882e-05
Leptonema	0.00106428	0.000138279	0.00236465	0	0	0	0.000628752	0.00167177	0	6.25029e-05	0	0.00204571	0.000926435	0	0.000232305	0	0.000421157	0.000278354	0.00183173	0.00120072	0.000175792	0.000618302	0	0.000190594	0.000153845	0.000309123	0	0	0.00280754	7.28005e-05	0	0.000824711	0	0.000470863	0.000662571	6.81106e-05	0.000584246	0.000734793	0.00311976	0	0	0	0	0	0	0	0	0	0
Marinobacterium	0.000322508	0.000138279	8.24878e-05	0.00265066	0.00259173	0.000551372	0.0010344	0.00102043	0.00330792	0.00232823	0.000959277	0.000574479	0.000471069	0.000645245	0.000362976	0.000738684	0.000421157	0.00116403	0.000126326	0.00016129	0.000135225	0.000515251	4.8815e-05	0.000238243	8.65376e-05	0.000140511	8.26332e-05	0.00114519	8.88462e-05	0.000145601	0.000499201	0.000168691	0.00151375	0.000565036	9.03506e-05	0.000681106	0.000101608	0.000179218	0.000187406	0.00128503	0.000834359	0.000998679	0.000827948	0.000746719	0.000620599	0.000374129	6.46998e-05	9.90099e-05	0.000135441
Aliivibrio	9.67523e-05	4.60929e-05	5.49919e-05	0.000659003	0.00101061	0	0	6.51339e-05	0.000191764	0.000375018	0.000185667	0.000224187	4.71069e-05	0.00443606	0.000246824	0.000203775	4.95479e-05	0.00015183	6.31632e-05	7.16846e-05	0	0.000180338	0.00029289	4.76485e-05	0.000249998	9.83574e-05	0.000220355	0.000416432	7.1077e-05	2.42668e-05	0.000873602	3.74869e-05	0.00058723	3.7669e-05	0	0.00227035	0	5.37654e-05	5.51195e-05	0.000183576	0.000521474	0.000847364	0.00016099	0.000387719	0.00144384	0	0.00015528	5.65771e-05	0.000243793
BD1_7	0.00103203	0.00010755	0.000384943	0.00330966	0.00559096	0.00124453	0.00247444	0.00277904	0.00674769	0.0027345	6.18888e-05	0.00267623	0.000847923	0.000903342	0.000900181	0.00117171	0.000644122	0.00275824	0.000505306	0.000842294	0.000608511	0.00105627	0.000268483	0.000810025	0.00135576	0.000252919	0.000550888	0.00276928	0.000497539	0.000473203	0.00139776	0.00059979	0.00386267	0.000339021	0.000737863	0.00174817	0.000711256	0.000806481	0.000562219	0.00325848	0.001627	0.002532	0.00179389	0.00173756	0.00222909	0.00144975	0.000491718	0.000594059	0.000650116
Thiothrix	0.000274132	0.00367206	0	0.000761514	0.00472705	0.000787674	0.00117638	0.00362578	0.00141426	0.000890667	0.00328011	0.00198966	0.00329748	0.00141954	0.00140835	0.000534909	0.000792766	0.00703477	0.000989557	0.000770609	0.0010818	0.000180338	0.000317298	0.000238243	0.000605763	0.00413101	0.00104669	0.0007704	0.000284308	0.000254802	0.000549121	0.000131204	0.00382352	0.000715712	9.03506e-05	0.000158925	0.0013209	0.000573497	0.000143311	0.000948476	0.000688346	0.000796925	0.00128792	0.00178064	0.000341963	0.00257214	0.000750518	0.000721358	0.000636572
Sneathiella	0.000387009	9.21857e-05	0.000989854	0	0	0	0.000324517	0.000455937	3.59557e-05	0	0	0.000434362	0.000251237	0.000209704	0	0.000382078	0.000198192	0.000177134	0.000400034	0.000770609	0.000243404	0.000206101	0.000366113	0.000142946	0	8.43064e-05	2.75444e-05	0.000437254	5.33077e-05	0.000558137	0.00142272	0.00059979	0.000495883	0.00020718	0.000436694	0.00324661	0.000228618	0.00132621	0.00102522	0	4.17179e-05	0	0	0	0	0	0.00011646	0	5.41763e-05
Devosia	0.00191892	0.000768214	0.00277709	4.39335e-05	4.89006e-05	0	0.0013792	0.00160663	0.000167793	6.25029e-05	9.28333e-05	0.000350292	0.000329748	0.000306491	0.000188748	0.000280191	0.000792766	0.000632623	0.000989557	0.00806452	0.00182553	0.000180338	0.000366113	0.00131033	9.61529e-05	0.0012646	0.000509572	0.000437254	0.000870693	0.00203841	0.000998403	0.00372994	0.000326239	0.000395525	0.00531562	0.00174817	0.00088907	0.00553783	0.00319693	3.0596e-05	0.000229449	0	0.000413974	0.00011488	0.000785247	0.000701492	0.00367495	0.00585573	0.00261401
OM60	0.00041926	0.0122761	0.000907366	0.00150838	0.00084761	0.0110274	0.00371167	0.00592718	0.00135433	0.00201572	0.00340389	0.0309938	0.0105205	0.00200026	0.0055608	0.000636797	0.000272513	0.00164482	0.000779013	0.00213262	0.00343471	0.00128813	0.00029289	0.00050031	0.00168268	0.0171844	0.00311252	0.000728757	0.000515308	0.00046107	0.00102336	0.000918429	0.000887369	0.00107357	0.00019576	0.00113518	0.000787462	0.000627263	0.0012898	0.00192755	0.000563192	0.000857451	0.000252984	0.000804159	0.000582603	0.00144975	0.000207039	0.00724187	0.000474043
Marivirga	0.000161254	0	0	4.39335e-05	3.26004e-05	9.45209e-05	0.000121694	6.51339e-05	0	0	0	0	0	9.67867e-05	0	0.000127359	0	5.06098e-05	0	0.000286738	8.11348e-05	0.000154575	0.00019526	0.000142946	2.88459e-05	0	0	0.000353968	7.1077e-05	3.64003e-05	0.000424321	7.49738e-05	0.000156595	5.65036e-05	7.52921e-05	0.000408664	0.000152412	0.000107531	6.61434e-05	0.000351854	0.00481842	0.000282455	0.00335779	0.000459519	0.000607934	0.00163681	3.88199e-05	0.000212164	0.000338602
Marine_group_II_Group	0.000193505	0	0.00208969	0	0.000831309	0.00102398	0	0	0.000119852	0	0	4.20351e-05	0	0	0	0.0073359	0.000222965	0.00159421	0.000105272	3.58423e-05	0.00285324	0.00687861	0.00512558	0.00462191	0	7.02553e-05	0	0.00191559	3.55385e-05	0.00192921	0.00292033	0.000224921	0.0015268	0.000960561	0.000466811	0.000272442	0.00281962	0.0012366	0.000716553	3.0596e-05	0.00225277	9.0789e-05	0	0	0	0.00112239	0	0	0
Marinimicrobium	0.000193505	0	5.49919e-05	0	3.26004e-05	0	6.0847e-05	4.34226e-05	2.39705e-05	0.000125006	0	0.000420351	0.000266939	0.000225836	5.80762e-05	0	9.90958e-05	0	4.21088e-05	0	9.46573e-05	0.000412201	9.763e-05	0.000142946	3.84612e-05	0	2.75444e-05	0.000104108	0.000213231	6.06671e-05	0.000349441	5.62303e-05	5.21982e-05	0	6.02337e-05	0.000476774	7.6206e-05	0	4.40956e-05	0.000275364	0.000479756	0.000272367	0.00016099	0.00011488	0.000113988	0.000140298	0.000245859	0.000169731	0.000176073
Salinimicrobium	3.22508e-05	0.00010755	0.000687399	0.000629714	0	0.00218974	0	0.000130268	4.79409e-05	3.12515e-05	0	0.000196164	0.000125618	0	7.25953e-05	0	0	0.000177134	0.000442142	0	5.40899e-05	0.000128813	4.8815e-05	0.00016677	1.92306e-05	0.000238868	0.000468255	0	0.00246993	0.000121334	0.000199681	0.00106838	3.91486e-05	0	0.000301169	0.000658403	0.000558844	0.000268827	0.000209454	0.000520132	0.00156442	0.000564909	0.000643959	0.00018668	0.000265971	0.000187064	2.58799e-05	2.82885e-05	0.00029797
Coxiellaceae_Group	3.22508e-05	0.0002151	0	0.00029289	0.000130401	3.1507e-05	0.000121694	0	0.000191764	0.000453146	0.000804555	0.000938783	0.000423962	0.000516196	0.000711434	0.000229247	0.000148644	0.000253049	0.00231598	0.000143369	0.000202837	0.000412201	9.763e-05	0.000190594	6.7307e-05	0.000210766	2.75444e-05	0.000437254	0.001155	0.000145601	0.000274561	5.62303e-05	0.000391486	0.00020718	7.52921e-05	0.000158925	0.000228618	3.58436e-05	7.71673e-05	4.5894e-05	0.000333744	3.0263e-05	6.89957e-05	0.00015796	2.53306e-05	0.000748258	2.58799e-05	0	0
Teredinibacter	0.00119328	0.000276557	0.000164976	0.000717581	0.000391204	0.00063014	0.000547623	0.000390803	0.000611247	0.00139069	0.000247555	0.00221385	0.000690901	0.00087108	0.000566243	0.000101887	0.000594575	0.000506098	0.000589523	0.000232975	0.000189315	0.000566777	0.000341705	0.000571783	0.000615379	0.000281021	0.000454483	0.000249859	0.000444231	0.000230535	0.00144768	0.000243665	0.000274041	0.000320187	0.000391519	0.000885438	0.00050804	0.000340514	0.000132287	0.000933178	0.000959513	0.000433769	0.0015179	0.000890319	0.00043062	0.00196418	0.000284679	0.000537482	0.000609484
Chlamydia	4.83762e-05	0	5.49919e-05	4.39335e-05	0.000244503	7.87674e-05	0	0.000108556	0.000119852	7.81287e-05	0	2.80234e-05	3.14046e-05	0	0	0.000229247	0.000222965	0.000328964	0.000357925	0	0.000229882	5.15251e-05	0.000366113	4.76485e-05	0	2.81021e-05	0	6.24649e-05	0.000231	0.000121334	4.99201e-05	3.74869e-05	0.000130495	0.000602705	0.000180701	0	0.000228618	3.58436e-05	4.40956e-05	0.000260066	0.000250308	8.07013e-05	4.59971e-05	0.0001436	0	0	0	0	8.12645e-05
Halomonas	0.00166092	0.000522386	0.000357447	0.00102512	0.00091281	3.1507e-05	0.00450268	0.00102043	0.000814996	0.00190634	0.000216611	0.000196164	0.000157023	0.000483933	0.000871143	0.000280191	0.00143689	0.00108811	0.00566363	0.00198925	0.00104123	0.00430235	0.000366113	0.000547958	0.00122114	0.000421532	0.00139099	0.000458076	0.00351831	0.00373709	0.0013728	0.00116209	0.000417586	0.000470863	0.0017016	0.000998956	0.00157492	0.00206101	0.00119058	0.000703708	0.00285768	0.000706136	0.000735954	0.000402079	0.000924566	0.00201094	0.0012293	0.000749646	0.000690748
Balneolaceae_Group	6.45016e-05	6.14571e-05	0	0	0.00176042	0	0	0	0	3.12515e-05	0	0	0	8.06556e-05	0	0.00127359	0	0	0	5.37634e-05	0	5.15251e-05	0.000122038	0	0	4.21532e-05	2.75444e-05	0.0033731	7.1077e-05	0	0.00104832	0	0.00348423	0	0.000180701	0.00186169	0	0	3.30717e-05	3.0596e-05	6.25769e-05	2.01753e-05	0	0	0	0	0	4.24328e-05	0
A714017_Group	0.000225755	0	0.00794633	0	0	0	0	0	0	0	0	0.000700584	3.14046e-05	0	0	0.00494154	0.000594575	0.000480794	0.000421088	0.000197133	0.00390799	0.00383862	0.00688292	0.0025492	0	4.21532e-05	0	0.00560102	0	0.00370069	0.00559105	0.000468586	0.00189218	0.00079105	0.000873389	0.00751487	0.0012447	0.0050181	0.00453082	0	0.00392149	7.06136e-05	0	0	0	0	0	0	0
Aquimarina	0.000177379	0.00149034	0.000329951	0	0.000440105	0.00211097	0.000770729	0.000130268	0.00025169	0.000453146	0.000154722	0.000826689	0.00102065	3.22622e-05	0.000392015	0	4.95479e-05	0.000202439	0.000231598	0.000107527	0	0.000283388	0	0	0.000173075	0.00108193	0.000344305	0.000395611	0.00104839	6.06671e-05	0	7.49738e-05	0.000613329	7.53381e-05	0	0.000476774	0.000431834	0	7.71673e-05	0.000933178	0.00100123	0.000716224	0.000505968	0.000358999	0.000253306	0.000701492	0	0.000226308	0.000460499
Gemmataceae_Group	0	0	5.49919e-05	0	0	3.1507e-05	0	0	0	0	0	2.80234e-05	4.71069e-05	0	0	5.09437e-05	0	0	0	7.16846e-05	2.70449e-05	5.15251e-05	0	0	4.80765e-05	0	0	0	0	0	0	0	0	0	0.000135526	9.08141e-05	0	7.16872e-05	0	0	4.17179e-05	0	0	0	2.53306e-05	0	0	0	2.70882e-05
Persicobacter	0	0	0	0	0	0.000110274	0	0	3.59557e-05	0	0	7.00584e-05	0	4.83933e-05	0	5.09437e-05	0	0	4.21088e-05	3.58423e-05	0	0	0	0	1.92306e-05	0	0	0	0	0	7.48802e-05	0	7.82973e-05	0	0	4.54071e-05	0	0	6.61434e-05	4.5894e-05	8.34359e-05	2.01753e-05	4.59971e-05	2.872e-05	0	9.35322e-05	0	0	0
Zhouia	0	0.000291921	0.000522423	2.9289e-05	0	0.000283563	0.000202823	0	0	0	6.18888e-05	0.000140117	0.000125618	0	0.000246824	0	0	0	0.00128432	3.58423e-05	2.70449e-05	5.15251e-05	0.000463743	0.000524134	3.84612e-05	0.00026697	0.000137722	4.16432e-05	0.00181246	8.49339e-05	0.000574081	0.00213675	0	0	4.51753e-05	0.0057894	0.000177814	0.000268827	0.000474028	9.1788e-05	0.000250308	5.04383e-05	9.19942e-05	5.74399e-05	3.79958e-05	9.35322e-05	0	0	2.70882e-05
Muricauda	6.45016e-05	0	0.000219968	5.8578e-05	0	0	0	4.34226e-05	0	0	0	0	3.14046e-05	0	2.90381e-05	0	4.95479e-05	5.06098e-05	6.31632e-05	0	4.05674e-05	0	0	7.14728e-05	0	5.62042e-05	0.000137722	0	0.000302077	7.28005e-05	0	5.62303e-05	0	3.7669e-05	0.000165643	6.81106e-05	0.000152412	8.96089e-05	0.000209454	0	0	0	0	0	0	9.35322e-05	2.58799e-05	0	0
Fodinicola	0.000112878	0.000368743	0.000439935	0	0	0.000126028	0.000304235	0.000455937	0.000131838	0	6.18888e-05	7.00584e-05	7.85114e-05	0	0.000116152	0	4.95479e-05	0.000328964	0.000652687	0.00485663	0.000608511	0	0	0.000309716	1.92306e-05	0.000562042	0.000261672	0	0.000284308	7.28005e-05	0	0.000581047	2.60991e-05	0.00037669	7.52921e-05	0	0.000482638	0.00143374	0.000870888	0	0	0	0	0	0	0	2.58799e-05	0	0
Thiohalorhabdaceae_Group	0.000822395	3.07286e-05	0.00313454	0.000248957	0.000489006	7.87674e-05	0.000649035	4.34226e-05	0.000263675	0.000578152	0	0.000154129	0.000141321	0.000371016	0.000145191	0.00601136	0.00626781	0.00379574	0.00448459	0.00121864	0.00558478	0.00352947	0.00602865	0.00376424	0.000557687	0.000168613	0.000151494	0.00424761	0.00245216	0.00336096	0.00319489	0.00059979	0.00130495	0.00866388	0.000873389	0.00188439	0.00480098	0.00105739	0.00119058	0.000642516	0.00181473	0.000181578	0.00032198	0.00012924	0.000177314	0.000514427	0	2.82885e-05	0.000176073
Epulopiscium	0	0	0	0	0	0	0	0	0	0	0	0	0	0	0	0	0	0	0	0	0	0	0	0	0	0	0	0	0	0	0	0	0	0	0	0	0	0	0	0	0	0	0	0	0	0	0	0	0
Nitrospina	0.000741768	3.07286e-05	0.00599412	0	0.000244503	0	4.05647e-05	0.000434226	0.000131838	0.000343766	0	2.80234e-05	3.14046e-05	0	2.90381e-05	0.0142133	0.00772947	0.0358318	0.00435826	0.000537634	0.0115076	0.0149938	0.0179883	0.0102206	0	0.000168613	2.75444e-05	0.00680867	0.000266539	0.00728005	0.00873602	0.00211801	0.000521982	0.0198704	0.000527045	0.0012714	0.0197119	0.00209685	0.00337331	0.00053543	0.00285768	0.000272367	4.59971e-05	0.000430799	0	0.000233831	0	5.65771e-05	0
Desulfosporosinus	0	3.07286e-05	5.49919e-05	2.9289e-05	0	0	0	0	0	0	0	0.000448374	0	0	0	0	0	0	0.00018949	0	0	0	0.000463743	0	0	0	0	0	3.55385e-05	2.42668e-05	0.00214657	5.62303e-05	3.91486e-05	0	0.000316227	0.00508559	0	3.58436e-05	4.40956e-05	3.0596e-05	4.17179e-05	0	0	2.872e-05	0	0	2.58799e-05	0	0
Candidatus_Endoecteinascidia	0.000709517	0.000122914	0.000329951	0	0.000211902	0	8.11293e-05	0	2.39705e-05	0	0.000309444	2.80234e-05	0	0.000322622	0.00119056	0.000254719	0.000644122	0.000126525	6.31632e-05	5.37634e-05	0.000473286	0.000360676	0.000927485	0.00066708	6.7307e-05	5.62042e-05	0	0.000478897	0.000213231	0.000206268	0.000624002	0.000131204	0.000482833	0.000866388	0.000240935	0.000499478	0.000304824	0.000232983	0.000187406	0	0.000146013	0	0	2.872e-05	0	0	0	0	0
Limnobacter	0.000661141	7.68214e-05	0.000274959	0.0130043	3.26004e-05	0	0.000669317	0.00138952	0	0	0	0	0.000235534	0.0266486	0	5.09437e-05	0.000148644	5.06098e-05	0.000126326	0.00164875	6.76123e-05	0.000360676	0.00556491	0.00100062	0	0.000379379	0.0002479	8.32865e-05	7.1077e-05	0.000291202	0.0179712	0.00131204	0.000130495	3.7669e-05	0.00480364	0.0432502	0.000203216	0.00163088	0.000363789	6.1192e-05	0.000458897	0.000121052	0.0032198	0.00134984	0.0142358	0.00219801	0.0114648	0.00523338	0.00854631
Albimonas	0	6.14571e-05	0	0	4.89006e-05	0.00348152	0.000162259	0	0	6.25029e-05	0	0.000588491	0	0	0	0	0	0	0	0.000107527	0	0	0	0	0	8.43064e-05	2.75444e-05	0	0	0	0	3.74869e-05	0	0	0	4.54071e-05	5.0804e-05	3.58436e-05	0	7.649e-05	0	7.06136e-05	0	0.00012924	0.000126653	0.000280597	6.46998e-05	9.90099e-05	2.70882e-05
Thalassobacter	0	9.21857e-05	0	2.9289e-05	0	0.00119727	4.05647e-05	0.000238824	0	4.68772e-05	0.000185667	0.000224187	0.000251237	3.22622e-05	5.80762e-05	0	0	0	0	0.000250896	0	0	0	0	3.84612e-05	2.81021e-05	2.75444e-05	0	0.000248769	2.42668e-05	0	3.74869e-05	0	0	9.03506e-05	0	0	0.000125453	0.000110239	0.000351854	4.17179e-05	0.000464032	0.000114993	0.00338895	0.000645929	0	0.000388199	0.000169731	0.000216705
Rubritalea	3.22508e-05	0	0.000247463	2.9289e-05	0	0.000519865	0.000223106	0	0	0	0	0.00650142	0.000502473	0	0	0.000764156	0	0.000430184	0.000842176	0.00134409	0.000283972	0.000386439	0.00131801	0.000929147	0	4.21532e-05	0	6.24649e-05	0.000586385	4.85337e-05	7.48802e-05	0.000206178	0	3.7669e-05	3.01169e-05	0	0.000711256	0.000143374	4.40956e-05	0	0	0	0	0	8.8657e-05	0	0.000232919	2.82885e-05	0
Selenomonas	9.67523e-05	0	0.000109984	0.000102512	8.15009e-05	9.45209e-05	0.00115609	0.000130268	0.000107867	0.000156257	0	0.00304054	0.000989244	0	5.80762e-05	0	0.000173418	7.59148e-05	0.000610578	0.000734767	0	0.000386439	0	0.000214418	0	8.43064e-05	5.50888e-05	0	0.000142154	3.64003e-05	4.99201e-05	0.000431099	9.13468e-05	0	0.000135526	0	0.000101608	0.000250905	0.000352765	0.000107086	0	0	0	0	2.53306e-05	0	9.05797e-05	0.00019802	2.70882e-05
Cytophagaceae_Group	0.00140291	0.000353379	0.00351948	0.000102512	0	0	0.000385364	0.000759895	0.000467424	0.000578152	0.000526055	0.0015553	0.000486771	9.67867e-05	0.000246824	0	0.000966184	0.00232805	0.0014317	0.00046595	0.00394856	0.00589963	0.00039052	0.00640873	2.88459e-05	0.000323174	2.75444e-05	0.000166573	0.000177692	0.00405256	0.000349441	0.000974659	9.13468e-05	0.00111124	0.00352367	0.00077192	0.00231158	0.00175634	0.00184099	3.0596e-05	0.000125154	2.01753e-05	0	0	2.53306e-05	0	0	0	2.70882e-05
Acidovorax	0.000757893	3.07286e-05	0.000219968	0.00351468	0	6.3014e-05	0	0.00017369	0.00190565	0.000375018	0	4.20351e-05	4.71069e-05	0.000258098	2.90381e-05	0	7.43218e-05	0	6.31632e-05	0.000107527	0.00278563	0.00175185	0	0.00016677	0.000201921	2.81021e-05	0	0	7.1077e-05	0.00234175	0.00017472	0	0	0.000546201	0.000255993	0.000431367	0.000101608	0.000161296	0.00243628	0	0.000375462	2.01753e-05	0.000206987	0	0.000202645	0.000140298	0.000556418	0.000509194	0.000121897
Salegentibacter	0.000435386	4.60929e-05	0.00868872	0	3.26004e-05	3.1507e-05	0	4.34226e-05	0	3.12515e-05	0	2.80234e-05	3.14046e-05	0	0.000493648	0	9.90958e-05	0.000379574	0.00250547	0.000107527	0.000243404	0.000566777	0	0.000142946	0	0	0.000743699	0	0.0173961	0.000169868	0	0.000862198	2.60991e-05	5.65036e-05	7.52921e-05	0.000749217	0.00345467	0.000286749	0.000374813	0	8.34359e-05	0	0	5.74399e-05	2.53306e-05	0.000327363	0	0	6.77204e-05
Thiorhodospira	0	0	0	0	0	0.000141781	0	0	0	0	0	0	0	0	0	0	0	0	0	0	0	0	0	0	0	0	0	0	0	6.06671e-05	0	0	0	0.000244849	0	0.000158925	0	0	4.40956e-05	7.649e-05	0.00164786	0.00215876	4.59971e-05	7.17999e-05	7.59917e-05	0	0	0	0
Cellvibrio	0.00249944	0.000522386	0.000687399	0.0140734	0.00110841	0.000472605	0.000750446	0.00106385	0.00157007	0.00142194	0.000526055	0.00242402	0.000769412	0.00380694	0.000784029	0.000152831	0.00218011	0.00141708	0.000821122	0.000878136	0.000432719	0.00198372	0.000610188	0.00216801	0.000701916	0.000758757	0.000289216	0.000749578	0.000657462	0.000582404	0.00179712	0.00164942	0.000521982	0.000734546	0.00237923	0.00474504	0.0013209	0.00109323	0.000617338	0.0023253	0.0015227	0.00100877	0.00170189	0.00202476	0.00398956	0.000795024	0.00329969	0.00120226	0.00238376
Achromobacter	0.000290257	6.14571e-05	0.000192472	0.00172805	0	0	8.11293e-05	0.000434226	0	0	0.000123778	0.000308257	0.00105205	0.00296812	0.000101633	0	0.000222965	0.00010122	0.000231598	0.000663082	8.11348e-05	0.000154575	0.000659003	9.52971e-05	1.92306e-05	5.62042e-05	0.000785016	0	7.1077e-05	0.000218402	0.00244609	0.000693507	0	0.000150676	0.000662571	0.00465423	0	0.000448045	0.000231502	0	0.000229449	3.0263e-05	0.000344978	0.00024412	0.00205178	0.00060796	0.00128106	0.000622348	0.00119188
RS62	0.000129003	0.000291921	0.000164976	0.00115692	0.00112471	0	0.00133863	0.00247509	0.00100676	0.00356267	0.000371333	0.00483403	0.00406689	0.00029036	0.000333938	0.000203775	0.00012387	0.000936282	8.42176e-05	0.000985663	0.00016227	0.000772877	0.000659003	0.000262067	5.76918e-05	0.000477736	0.000330533	0.000458076	3.55385e-05	0.000279069	0.00127296	5.62303e-05	0.00127886	0.000282518	3.01169e-05	0.00308768	0.000584246	0.00277788	0.000507099	0.000627218	6.25769e-05	0.000211841	6.89957e-05	0.00024412	0	9.35322e-05	7.76398e-05	0.000353607	0.000230249
Xanthomonadaceae_Group	0.00543426	0.000476293	0.00877121	4.39335e-05	0	6.3014e-05	0.00174428	0.00564493	0.000191764	6.25029e-05	0	0.00701985	0.0172725	0	0.00338294	0	0.00289855	0.00131586	0.00593734	0.0113978	0.00221768	0.00200948	7.32225e-05	0.00154858	0.00067307	0.000576094	0.0157554	0	0.00227446	0.00397976	0.000449281	0.00582921	2.60991e-05	0.00165744	0.00377967	0.000590292	0.00226078	0.00473135	0.00370403	0	0.000104295	0	0	0.00011488	0.000405289	0	0.000284679	0.000339463	0.000243793
Crocosphaera	0	0	0	0	0	3.1507e-05	4.05647e-05	0	0	0	0	0	0.0013661	0	0	0	0	0	0	0	0	0	0	0	0	0	0	0	0	0	0	0	0	0	0	0	0	0	0	0	0	0	0	2.872e-05	0	0	0	0	0
Dasania	0.000177379	0.00032265	8.24878e-05	0.000380757	0.000521606	0.00198494	0.000567905	0.000955296	0.000791025	0.000359392	0.000495111	0.00427356	0.00158593	0.000564589	0.00116152	0.000229247	0.000148644	0.000809758	0.000505306	0.000340502	0.000338062	0.000386439	0.000170853	0.00016677	0.00177883	0.000505838	0.00117064	0.000249859	0.000390923	0.000376136	0.000499201	0.000318638	0.000208793	0.000263683	7.52921e-05	0.000272442	5.0804e-05	0.000250905	0.000143311	0.000596622	0.000438038	0.000312718	0.000275983	0.000402079	0.00024064	0.000327363	5.17598e-05	0.00142857	8.12645e-05
Hyphomicrobium	0.000951398	0.000153643	0.000907366	2.9289e-05	4.89006e-05	3.1507e-05	0.000243388	0.000434226	0	3.12515e-05	0.000247555	0.000504421	0.000565282	0.000193573	7.25953e-05	0.000152831	0.000222965	0.000278354	0.000863231	0.00146953	0.000338062	0.000412201	0.000122038	0.000381188	3.84612e-05	0.000168613	5.50888e-05	0.000270681	0.000764078	0.000570271	0.000349441	0.00178063	9.13468e-05	0.000131842	0.000647512	0.000862734	0.00050804	0.000931933	0.00110239	6.1192e-05	0.000146013	0	4.59971e-05	0	0.000126653	0	0.00160455	0.00304102	0.00185554
Agaribacter	0	0	0	0	0	0	0	0	0	0	0	0	0	0	0.000145191	0	0	0	6.31632e-05	0	0	0.000128813	0	0	0.000182691	0	9.64055e-05	0	0.000159923	0	0	0	0	7.53381e-05	0	0	0	0	2.20478e-05	0	0.000187731	3.0263e-05	0	0.00024412	0	9.35322e-05	0	0	0
Nitrosococcus	0.00119328	0.000338014	0.00156727	0	9.78011e-05	0	8.11293e-05	0.000933585	0.000107867	0	6.18888e-05	0.00116297	0.00358012	0	0.000537205	0.000229247	0.000718444	0.000354269	0.0012001	0.0021147	0.000554421	0.00113355	0.000463743	0.000762377	0.000278843	0.000309123	0.00254786	0.000291503	0.000373154	0.000849339	0.000324481	0.00121832	0.000130495	0.000414359	0.0013402	0.00077192	0.000609648	0.000878168	0.000683482	3.0596e-05	0.000125154	2.01753e-05	0	0.00018668	0.0018238	0.000187064	0.00010352	0.000113154	5.41763e-05
Melioribacter	0.000306382	0.000891129	0.000302455	2.9289e-05	8.15009e-05	0	0.000162259	0.000282247	0	0	0.000185667	0.000224187	0.000109916	6.45245e-05	4.35572e-05	7.64156e-05	4.95479e-05	7.59148e-05	0.000252653	0.000268817	0.000432719	7.72877e-05	4.8815e-05	0.000857674	0.000173075	0.00120839	0	0.000229038	8.88462e-05	0.000618804	0.0001248	0.000993402	0.000195743	0.000113007	0.00137032	0.000158925	0.000203216	0.000465967	0.000275597	0	4.17179e-05	0	0	4.30799e-05	0	0	0	0	0
ZA3312c	0.000241881	0	0.00129231	2.9289e-05	0	0	0	0	5.99262e-05	0.000265637	0	5.60467e-05	3.14046e-05	0.00369403	0	0.00611325	0.00304719	0.00407409	0.00231598	0.000232975	0.00434071	0.0048176	0.0061751	0.00385953	0.000105768	5.62042e-05	0	0.00145751	0.00147485	0.00211121	0.00282049	0.000149948	0	0.00565036	7.52921e-05	9.08141e-05	0.00805243	0.00143374	0.00145515	0.000321258	0.000938654	8.07013e-05	0	0	0	0.00252537	0	0	0
Rubricoccus	8.0627e-05	3.07286e-05	0.000274959	0	0	3.1507e-05	4.05647e-05	0	0.000119852	0.000468772	0	0.00496014	0.00701892	0	0.000319419	0	0.00012387	0	0.000547415	0.000107527	5.40899e-05	0.0010305	0	0	6.7307e-05	0	0.000206583	0	0.00151039	7.28005e-05	0	7.49738e-05	0	0.000113007	0	9.08141e-05	0	0.00019714	2.20478e-05	0	0	2.01753e-05	0	0	0	0	0	0	0
Aurantimonas	0.000693392	0.000138279	0.000412439	8.7867e-05	0	4.72605e-05	0.0003448	0.00017369	0	0	0	0.000938783	0.00172725	0	0.000638838	0	9.90958e-05	0	0.000694795	0.000340502	8.11348e-05	0.000283388	7.32225e-05	0.000428837	1.92306e-05	0.000154562	0.000399394	4.16432e-05	0.000888462	0	4.99201e-05	0.000618534	2.60991e-05	7.53381e-05	0.00019576	0.000158925	0.000228618	0.000250905	0.000341741	0	6.25769e-05	0	0	0	0	0	0.00011646	9.90099e-05	2.70882e-05
Neptunomonas	0.000499887	0	0.000164976	0.000219668	0.00102691	0.000173288	0.0003448	0.000564493	0.00101874	0.000343766	0	0.000364304	0.000235534	0.000161311	0	0.000127359	0.000322061	0.000531403	4.21088e-05	0	0.00016227	0.000128813	0	0.000119121	3.84612e-05	0	0	0.000166573	0	6.06671e-05	0.000499201	3.74869e-05	0.000469784	0.000131842	0.000135526	0.000499478	0.000177814	0.000143374	0.000286621	0.00126973	0.00185645	0.00160394	0.000850946	0.00232632	0.000962561	9.35322e-05	2.58799e-05	2.82885e-05	0.000176073
Psychroflexus	0.000757893	0.00135206	0.000384943	0.000102512	9.78011e-05	0.00283563	0.000730164	0.000651339	5.99262e-05	0.00032814	0.000185667	0.00140117	0.00172725	0.000983998	0.000551724	0	7.43218e-05	0.000177134	0.000736904	0.000322581	0.00010818	0.000309151	7.32225e-05	9.52971e-05	0.000230767	0.00141916	0.000605977	0	0.00193685	0.000133468	0.000274561	0.000693507	0.000169644	0.000113007	4.51753e-05	0.000567588	5.0804e-05	0.00030467	0.000319693	0.000397748	0.000667487	0.000423682	0.00170189	0.000588759	0.000379958	0.0028995	0	0.000311174	0.000243793
Enhydrobacter	0.000193505	0.000522386	5.49919e-05	0.000380757	0.00084761	0.000425344	0.000791011	0.000651339	0.000803011	0.000625029	9.28333e-05	0.000280234	0.000219832	0.000161311	8.71143e-05	0.000229247	0.000173418	0.000784453	0.000842176	0.000412186	0.000148747	0.000231863	0.000146445	0.000142946	0.000124999	0.000646349	4.13166e-05	0.000499719	0.00103062	0.000109201	0.0001248	0.000618534	0.000717725	3.7669e-05	0.00085833	0.000227035	0.00012701	0.00030467	0.000132287	0.00131563	0.000292026	0.00132148	0.00264483	0.00277148	0.000569938	0.000280597	0.000194099	2.82885e-05	0.000176073
Cellulophaga	0.000451511	0.000245829	0.000494927	5.8578e-05	0.000114101	0.00107124	0.0003448	0.000303958	0.000119852	9.37544e-05	0	0.000126105	0.000738007	0.00014518	0.000754991	0.000178303	0.000222965	0.000202439	0.000926394	0.000376344	0.000135225	0.000231863	0.000122038	0.000405013	0.000894222	0.000351277	0.00209338	0.000166573	0.00131492	0.000400403	9.98403e-05	0.000337382	0.000104396	5.65036e-05	7.52921e-05	0.00120329	0.0012193	0.000358436	0.000209454	0.000275364	0.000542333	0.000221929	0.000965939	0.0002872	0.00107655	0.00060796	0.000672878	0.00101839	0.00185554
CB31G03	0	7.68214e-05	5.49919e-05	0.00016109	0.000211902	7.87674e-05	0.00105468	4.34226e-05	2.39705e-05	0.000125006	0.000185667	0.0026342	0.00122478	0	0	0	0	0	0	0.000143369	0	0	0	0	0	0.00026697	6.8861e-05	6.24649e-05	0	3.64003e-05	0	0.000112461	0.000130495	0	0	0	0	5.37654e-05	0	0	0	0	0	0	0	0	0	4.24328e-05	0
Algoriphagus	0.000387009	0	0.000384943	0.000834737	0	0	0.000385364	0.000564493	0	0	0	7.00584e-05	0	0	0	0	0	0	4.21088e-05	0.00132616	5.40899e-05	0.000334913	0.000122038	0.000119121	4.80765e-05	7.02553e-05	0.000179039	0	0.00047977	0.000303335	0	0.000412356	0	0.000263683	0.000150584	0	0.000228618	0.000878168	0.000418908	0	0	0	0	0	0.00420487	0	0.00262681	0.000183876	0.0025192
Lysobacter	0.00232206	0.00110623	0.00302455	0.00016109	0	6.3014e-05	0.000649035	0.00243166	8.38966e-05	0	0.000464166	0.00271827	0.00574704	0.000258098	0.00136479	0	0.00143689	0.000531403	0.00231598	0.00629032	0.000865438	0.000283388	7.32225e-05	0.00169152	0.000336535	0.00165803	0.00538493	0	0.000390923	0.00183215	0	0.00539811	0	0.00058387	0.00823696	0.00038596	0.0012193	0.00284956	0.00187406	0	0	3.0263e-05	9.19942e-05	0	0.00067126	0	0.00153986	0.00154173	0.000785557
Defluviicoccus	0.00483762	0.00450174	0.00929363	0.00301677	0.00691128	0.0006774	0.00308291	0.00566664	0.00390719	0.00334391	0.00396089	0.00142919	0.002057	0.00304878	0.00345554	0.0147992	0.00735786	0.00698416	0.00195806	0.000824373	0.00850563	0.00623454	0.0139367	0.0116501	0.0031442	0.00369543	0.0013359	0.0100568	0.000799616	0.010095	0.0132288	0.00290523	0.00648563	0.00510415	0.00114444	0.00442719	0.00866208	0.00528693	0.00642693	0.00313609	0.004881	0.00201753	0.00193188	0.00205348	0.00108921	0.00486368	0.000219979	0.000650636	0.0011377
Kangiella	0	0.000291921	0	0.000234312	0.000260803	9.45209e-05	0.000162259	6.51339e-05	5.99262e-05	0.00010938	6.18888e-05	0.000112093	0.000157023	0.00398439	8.71143e-05	0.000356606	0	7.59148e-05	0	0	0	0.00010305	0.000146445	7.14728e-05	3.84612e-05	0.000252919	6.8861e-05	0.000312324	3.55385e-05	0	0.00294529	3.74869e-05	0.000247941	0	0.000135526	0.0019071	5.0804e-05	0.000161296	0.000716553	0.000198874	0.00131412	0.00116008	0	0.000416439	0.000557272	0.00121592	3.88199e-05	0	0.000108353
Lutibacter	0.000274132	0.000414836	0	0	0.000130401	0.00373358	0.000365082	0.000195402	0.000191764	4.68772e-05	0	0.000686573	0.000408259	0	0.000362976	0.000331134	0.000272513	0.00245458	0.000168435	0.000143369	2.70449e-05	0	0	4.76485e-05	0.000423073	0.000365328	0.000881421	0.000104108	3.55385e-05	9.70674e-05	0	9.37172e-05	0.000143545	0	0	0	0.00111769	0.000143374	6.61434e-05	0.000137682	0.000166872	0.000827188	0.000183988	0.000502599	0.000227975	0.000187064	5.17598e-05	0.000339463	0.000555307
Lutimonas	0	3.07286e-05	0	0	3.26004e-05	0.000645893	0	0	2.39705e-05	3.12515e-05	0	0.000140117	0	0	0	0	0	7.59148e-05	0	0	0	0	0	0	0	7.02553e-05	4.13166e-05	4.16432e-05	0	0	0	0	2.60991e-05	0	0	0	7.6206e-05	8.96089e-05	0	4.5894e-05	0	3.0263e-05	0	2.872e-05	3.79958e-05	0	0	8.48656e-05	4.06322e-05
Parvularcula	0.00191892	0.000952586	0.00395942	0.000102512	8.15009e-05	0.000267809	0.00227162	0.00347381	0.000215734	0.000390643	0.000990222	0.00218582	0.00252807	0.000387147	0.000362976	0.000229247	0.00116438	0.00182195	0.00431615	0.00277778	0.0022853	0.0016488	0.00029289	0.00259685	0.000115384	0.00158777	0.000192811	0.000249859	0.000906232	0.00287562	0.000499201	0.00601664	0.000195743	0.000696877	0.00677629	0.00118058	0.00228618	0.00299294	0.00517021	0.000290662	0.000125154	0.00017149	4.59971e-05	0.00012924	0.000189979	0.000187064	0.000789337	0.000466761	0.000311514
SGSH944	0	3.07286e-05	0.00164976	0	0.000407505	9.45209e-05	0.000121694	0	0.000215734	0	0	8.40701e-05	0	3.22622e-05	2.90381e-05	0.00759062	0.00069367	0.00156891	0.00033687	0.000215054	0.0063826	0.00628607	0.00827415	0.0042169	0	7.02553e-05	0	0.00389364	7.1077e-05	0.0042467	0.00504193	0.000581047	0.000417586	0.00237315	0.000165643	0.00247469	0.00426753	0.00120076	0.0010142	7.649e-05	0.00100123	0	4.59971e-05	8.61599e-05	0	0.00126269	0	0	0
Krokinobacter	0.000145129	0.00112159	0.000687399	5.8578e-05	0.000228203	0.000834935	0.000243388	0.000369092	0.000203749	0.000125006	0.000309444	0.000392327	0.000628091	9.67867e-05	0.00046461	0.000101887	0.000148644	0.000126525	0.00115799	7.16846e-05	5.40899e-05	0.000437964	0.000170853	0.000119121	0.000259613	0.000772808	0.00104669	0.000437254	0.0031807	0.000121334	0.00017472	0.000112461	0.000130495	3.7669e-05	3.01169e-05	0.00165736	0.00109229	0.000161296	0.000143311	0.000428344	0.00106381	0.000554821	0.00032198	0.000416439	0.000151983	0.000420895	3.88199e-05	0.00019802	0.000189617
Marine_group_III_Group	4.83762e-05	0	0.00148478	0	0	0	0	0	0	0	0	0	0	0	0	0.00282738	9.90958e-05	0.000556708	0.000273707	0.000143369	0.00179849	0.00342642	0.00219668	0.0024539	0	0	0	0.000749578	3.55385e-05	0.00243882	0.00167232	3.74869e-05	0.00057418	0.00113007	0.000180701	0.000476774	0.0013209	0.00112907	0.00120161	0	0.0012724	0	0	0	0	0	0	0	0
Saprospira	0.000241881	0	0.00181473	0	9.78011e-05	3.1507e-05	0.00590216	0.00156321	5.99262e-05	7.81287e-05	0	0.000924771	0.000157023	0.000806556	0.00103085	0	0.00359222	0.000506098	0.000400034	0.00193548	0.00242052	0.000541014	4.8815e-05	0.0016677	0	0.000112408	0.000165266	0.000312324	0.000515308	0.00423456	0.000274561	0.00299895	0.000221842	0.00099823	0.000496928	0.00031785	0.00116849	0.00207893	0.00458594	6.1192e-05	0.000458897	0	9.19942e-05	0.000445159	0.000101322	0.000187064	0	0	0
Alicycliphilus	0	4.60929e-05	0.000109984	0.0038515	0	3.1507e-05	4.05647e-05	0.000260535	0	0	0	4.20351e-05	4.71069e-05	0.000419409	2.90381e-05	0	0	0	0	0.000197133	0	5.15251e-05	4.8815e-05	9.52971e-05	0	0	0	0	0	3.64003e-05	0.000349441	0.000112461	0	0	0.000271052	0.00104436	0	0.000268827	2.20478e-05	0	0.000479756	3.0263e-05	0.00032198	0	0.000253306	0	0.000582298	0.000155587	0.000257338
Bacteriovorax	0.000145129	0	0.000824878	2.9289e-05	3.26004e-05	6.3014e-05	0.00026367	4.34226e-05	2.39705e-05	0	0	8.40701e-05	3.14046e-05	3.22622e-05	0	5.09437e-05	9.90958e-05	0.000177134	0	0	0.000297494	0	0	0.000381188	0	2.81021e-05	0	0	3.55385e-05	0.000861473	0.000224641	0.000318638	0.000260991	0.000188345	0.000271052	0.000295146	0.00038103	5.37654e-05	0.000474028	3.0596e-05	0.000271167	0	0.000275983	0.000545679	0	0.000374129	0	2.82885e-05	0
HTCC2089_Group	0.000193505	0.00703684	0.000577415	0.00124478	0.00088021	0.000472605	0.000628752	0.000564493	0.00123448	0.00160945	0.0115113	0.00211576	0.00282641	0.00117757	0.00198911	0.000789628	0.00012387	0.000632623	0.000378979	3.58423e-05	0.000906005	0.00079864	0.000854263	0.00104827	0.00116345	0.00754542	0.000399394	0.00110355	0.00047977	0.00088574	0.00107328	0.000506073	0.000378437	0.000301352	0.000391519	0.000272442	0.00063505	0.000627263	0.000617338	0.00030596	0.000333744	0.000242104	0.00016099	0.00015796	0.000164649	0.00187064	9.05797e-05	0.000127298	6.77204e-05
Oceanospirillaceae_Group	0.000370884	6.14571e-05	0.000192472	0.000864026	3.26004e-05	0	8.11293e-05	0	0	4.68772e-05	0.000216611	0.000266222	0.000172725	0.000387147	0.000421053	0.000764156	7.43218e-05	0	0.00103167	0	0.000148747	0.00010305	0.00119597	0.000190594	0.000307689	0	0.000234128	0.000728757	0.000426462	6.06671e-05	0.00257089	0	0.00028709	0.000113007	3.01169e-05	0.00113518	0.00012701	0.000215061	0.000143311	0.000596622	0.00496444	0.00255218	0.000275983	0.0001436	0.000493946	0.000420895	0	0	0.000568851
Halioglobus	0.000306382	6.14571e-05	5.49919e-05	0.000190379	0.000146702	0.000330823	0.000141976	0.000282247	0.000347572	0.000234386	0.000154722	0.00175146	0.000690901	0.000193573	5.80762e-05	0	0.000148644	0	0.00018949	7.16846e-05	0.000216359	0.000386439	0.000122038	4.76485e-05	1.92306e-05	0.000252919	6.8861e-05	0.00012493	0.000159923	0.000133468	0.00144768	0.000149948	0.000143545	3.7669e-05	0.000150584	0.000908141	0.00025402	8.96089e-05	0.00019843	0.00030596	0.00102209	0.000514471	0.000229986	0.000402079	0.00021531	0.000561193	0	0.000254597	0.000230249
Hoppeia	0.000548263	0	0.000247463	0	3.26004e-05	0	6.0847e-05	6.51339e-05	0	0	0	0.000238199	0.000392557	0.000387147	0.000145191	0	7.43218e-05	0	0.000357925	0	0	0.000128813	0	7.14728e-05	3.84612e-05	0	0.000192811	4.16432e-05	0.00143931	0.000121334	0.000199681	0.000337382	0	0	0	0.000976252	0.000482638	0	2.20478e-05	3.0596e-05	6.25769e-05	0	0.000206987	0.000330279	0	0.00196418	0	0	0
Myroides	0.000387009	0	0	2.9289e-05	0	0.000204795	0	0.000151979	7.19114e-05	0	0	5.60467e-05	0.000706603	0	0.000842105	0	0.000346835	0.00010122	0.000231598	7.16846e-05	0.000148747	0.000231863	0	0	0.00135576	0	0.00235505	0	0.000302077	4.85337e-05	0	0.000168691	0	0.000169511	3.01169e-05	0.000113518	0.00038103	0	0.000132287	3.0596e-05	0	0	4.59971e-05	0	0	0	0	2.82885e-05	2.70882e-05
Fervidicoccaceae_Group	0.000274132	0.00053775	0.000274959	0.00478875	0.000831309	0.00168562	0.000791011	0.00312642	0.00228918	0.00242199	0.000866444	0.00110692	0.0013975	0.00058072	0.00113249	0.00129907	0	0.00316312	0.00134748	0.00155914	0.00155508	0.00133965	0.00119597	0.000929147	0.00067307	0.000519889	0.000110178	0.000270681	0.000426462	0.00156521	0.000698882	0.00170565	0.000143545	0.000640374	0.00127997	0.000544885	0.000939873	0.00150543	0.00163154	0.000367152	0.000917795	8.07013e-05	9.19942e-05	0.00017232	0.00345762	0.000327363	0.000724638	0.000254597	0.000392778
Pedosphaera	0	0	5.49919e-05	0	0	0.000110274	6.0847e-05	0.000108556	3.59557e-05	0	6.18888e-05	0	0	3.22622e-05	0	5.09437e-05	0	0.000177134	6.31632e-05	0	6.76123e-05	0.000128813	0	7.14728e-05	0	4.21532e-05	0	6.24649e-05	3.55385e-05	8.49339e-05	0	9.37172e-05	2.60991e-05	0.000150676	0.000120467	0	0.000177814	8.96089e-05	0.000121263	0	0.000104295	3.0263e-05	0	0	0	0.000187064	0	0	0
Rickettsiaceae_Group	0.000403135	3.07286e-05	0.000219968	0.000248957	0.000179302	0.000472605	0.00026367	0.000282247	5.99262e-05	0.000296889	0	0.000770643	0.000800817	0.000112918	0	0.000254719	0.000222965	5.06098e-05	0.000231598	0.000197133	0.000500331	0.000257626	4.8815e-05	0	3.84612e-05	5.62042e-05	0	0.000270681	3.55385e-05	0.000218402	0.00014976	0.000506073	0.000143545	7.53381e-05	0.000391519	0.000476774	0	0.000286749	0.000143311	3.0596e-05	0.00123068	4.03506e-05	0.00016099	0.0001436	0.00144384	0	0.000323499	0.000169731	0.000203161
Catenococcus	8.0627e-05	4.60929e-05	0	5.8578e-05	0.00092911	0	0	0	0.000143823	0.000125006	0.000216611	0	0	0.00143567	0.00196007	0.000152831	0	5.06098e-05	0.000357925	0	5.40899e-05	0.00010305	0	0	0.00357689	0	0.00166644	0.000249859	0.000373154	0.000109201	0	0	0.000260991	0.000395525	0	6.81106e-05	0	0	2.20478e-05	0	0.000980372	0.000332893	0	2.872e-05	0.000265971	0	0	0	0
Bermanella	0.000241881	6.14571e-05	0.00013748	0.000102512	0.000309703	0.000472605	4.05647e-05	0	0.00027566	0.000265637	0.000216611	0.000448374	0.000471069	0.000306491	0.00076951	0.000101887	0.000222965	0.00015183	0.00206333	0.000215054	0.000148747	0.000257626	0.000219668	9.52971e-05	0.00159614	8.43064e-05	0.000592205	0.000374789	0.00259431	0.000194135	0.000224641	0	0.000117446	0.000150676	3.01169e-05	0.000204332	0.000228618	3.58436e-05	5.51195e-05	0.000550728	0.00154356	0.000726312	0.000344978	0.00018668	0.000278636	0.000187064	2.58799e-05	9.90099e-05	0.000284426
Chlamydomonadaceae_Group	0	4.60929e-05	0	0.00243099	6.52007e-05	0	0.000121694	0.000151979	0	9.37544e-05	0	0	0	0	0	0	0	0	0	0.00132616	0	5.15251e-05	4.8815e-05	9.52971e-05	0	0	0	0.000229038	0	4.85337e-05	7.48802e-05	0.000468586	0.000143545	0	0	6.81106e-05	0	0.00130829	0.000496075	0	0	0	0	0	0	0	0	0	0
Mongoliitalea	0	0	0	0	0	0	0	0	0	0	0	0	0	0	0	0	0	0	0	0	0	0	0	0	0	0	0	0	0	0	0	0	0	0	0	0	0	0	0	0.00030596	0.00346259	5.04383e-05	0.000275983	0	0.000113988	0	0	0	0
Ascidiaceihabitans	6.45016e-05	0.002151	0.000164976	0.00142052	0.000326004	0.00230001	0.000486776	0.000738184	0.000850952	0.00121881	0.00779799	0.000658549	0.00124048	0.00475868	0.000842105	0.000101887	0.000247739	0.00146769	8.42176e-05	0.000645161	8.11348e-05	0.00010305	0	4.76485e-05	0.00123076	0.00244488	0.000165266	0.000249859	0.000568616	9.70674e-05	0	0.000243665	0.00028709	0.0021283	0.00019576	0.000136221	0.000457236	0.000340514	0.000121263	0.00328907	0.000146013	0.00442848	0.00112693	0.000660559	0.00212777	0.00177711	0.000504658	0.000410184	0.00212642
Caulobacter	0.000387009	0.00010755	0.000412439	0.000102512	0	3.1507e-05	0.00026367	0.000390803	0	0	0	0.000378316	0.000486771	4.83933e-05	4.35572e-05	0	9.90958e-05	0.00010122	0.000863231	0.0015233	0.000121702	0.000927453	0	0.000190594	4.80765e-05	0.000252919	2.75444e-05	0	0.000977309	0.000473203	0	0.00112461	0	0	0.000828213	0	0.000203216	0.000734793	0.000738601	0	0	0	4.59971e-05	0	0.000303967	0	0.00406315	0.00353607	0.00219414
Gelidibacter	0.000354759	0.00032265	0.000164976	0.000131801	4.89006e-05	0.000693154	0.000223106	0.000238824	3.59557e-05	0.000156257	0	0.000448374	0.000769412	0.000161311	0.000479129	0	0.000421157	0.00015183	0.000294762	0.000197133	9.46573e-05	7.72877e-05	0	0	0.000269228	0.000210766	0.000716155	0.000187395	0.000462	0.000157734	9.98403e-05	0.000149948	0.000143545	0	0	0.000204332	0.000279422	0.000322592	0.000209454	0.000290662	8.34359e-05	0.000191666	0.000183988	0.0002154	0.000303967	0.000327363	6.46998e-05	0.000212164	0.000433411
Salinihabitans	0.000145129	0.000614571	0.000192472	0.00127407	0.000342304	0.00192193	0.00060847	0.00104214	0.000850952	0.00256262	0.000402278	0.000560467	0.000926435	0.000161311	0.000508167	0	0.000173418	0.000404879	0.000294762	0.00145161	0.000135225	0.000309151	4.8815e-05	0	0.000298074	0.00053394	0.000495799	0.000208216	0.00223893	0.000242668	0	0.000524816	0.00030014	9.41726e-05	0.000135526	0.000181628	0	0.00114699	0.000617338	0.000673112	4.17179e-05	0.000756575	0.000183988	0.00025848	0.00122853	0.000327363	0.000828157	0.00130127	0.000812645
Luteolibacter	9.67523e-05	3.07286e-05	0.000522423	2.9289e-05	3.26004e-05	0.00329248	4.05647e-05	0	0	3.12515e-05	0	0.000588491	6.28091e-05	0	0	0	4.95479e-05	0.0160686	0.000631632	0.000107527	2.70449e-05	0.000128813	0	0	0	5.62042e-05	0.000840105	0	0	9.70674e-05	0	9.37172e-05	0	0.000113007	7.52921e-05	0	0.00485178	7.16872e-05	8.81912e-05	0	0	0	0	0	0.000557272	0	0.00361025	0.000636492	2.70882e-05
Emticicia	0	0	8.24878e-05	5.8578e-05	0	3.1507e-05	0	0.000195402	0	0	0	0	0	0	0	0	0	0	0	0.000125448	8.11348e-05	0.00079864	0	0	0	0	0	0	0	0	0	0	0	0	0	0	0	0.000215061	7.71673e-05	0	4.17179e-05	0	0.000183988	0	0.000113988	0	0.000388199	0.000721358	0.00134086
Spiroplasma	0.00256394	0	0.000384943	0	0	0	0	4.34226e-05	0	0	0	7.00584e-05	9.42137e-05	0	0.00015971	0	0.000520253	0	0.00018949	0.000107527	0	0.00010305	0	0	1.92306e-05	4.21532e-05	0	0	0.000924001	0	4.99201e-05	0	0	7.53381e-05	0	4.54071e-05	5.0804e-05	0	0.000187406	0	0	0	0	0	2.53306e-05	0	0	0	0
Planktomarina	0.00020963	0.00334941	0	0.00301677	0.00104321	0.00193768	0.001724	0.00188888	0.00234911	0.00496898	0.00201139	0.00091076	0.00180576	0.000612982	0.000813067	0.000127359	7.43218e-05	0.0010375	6.31632e-05	0.00016129	0	0.000309151	0	0	0.000249998	0.00275401	0.00012395	0.000520541	0.000550847	0	9.98403e-05	0.000187434	0.00118751	0.000169511	0	0	0.000101608	0.000250905	0.000242526	0.00399278	0.000104295	0.00371226	0.0015869	0.00152216	0.00295101	0.00201094	0.00010352	0	0.00158466
Oceaniovalibus	6.45016e-05	0.000507021	5.49919e-05	0.00058578	0.000228203	0.0011185	0.000628752	0.000303958	0.000287646	0.00101567	0.000123778	0.00016814	0.00020413	8.06556e-05	0.000145191	0.000178303	7.43218e-05	0.000455489	0.000105272	0.000519713	4.05674e-05	0	7.32225e-05	9.52971e-05	6.7307e-05	0.000337225	9.64055e-05	0.00012493	0.000213231	0.000169868	0.0001248	0.000393612	0.000169644	3.7669e-05	0.000271052	0.000158925	0.000101608	0.000376358	0.00019843	0.000887284	6.25769e-05	0.000595172	0.000597962	0.0022976	0.000645929	0.000280597	0.000608178	0.000523338	0.000406322
Thalassobius	0.000322508	0.000245829	0.000412439	0.000366113	6.52007e-05	0.000834935	0.0003448	0.00130268	0.000107867	0.000375018	0.000309444	0.000308257	0.000188427	0.000371016	0.000130672	0	0.000272513	0.00015183	0.000147381	0.00302867	0.000500331	0.000128813	7.32225e-05	0.00016677	0.000134614	0.000365328	0.000592205	0.000166573	0.00101285	0.000254802	0.000249601	0.000431099	7.82973e-05	5.65036e-05	0.000316227	0.00038596	0.000203216	0.00177426	0.000540171	0.00015298	0.000146013	0.000292542	0.000275983	5.74399e-05	0.0009119	0.000514427	0.00190217	0.00254597	0.00096163
Persicitalea	0	6.14571e-05	8.24878e-05	0	0	0	0	6.51339e-05	0	0	0	0	0	0	0	0	0	0	0	0	0	0	0	0	0	0	0	0	0	0	0	0	0	0	0	0	0	0	0	0	0	0	0	0	3.79958e-05	0	0	0	0.00066366
Marinomonas	0.00141903	0.00119841	0.000219968	0.00123014	8.15009e-05	0.000126028	0.000527341	0.000629627	0.000203749	0.000421895	0.000154722	0.000434362	0.000675198	0.000177442	0.000290381	0.000280191	0.000594575	0.000328964	0.00103167	0.000824373	0.000229882	0.00079864	0.000536965	0.000714728	0.000298074	0.00230437	0.000151494	4.16432e-05	0.00133269	0.000206268	0.00104832	0.00193057	2.60991e-05	0.000527367	0.00224371	0.00208873	0.000304824	0.00125453	0.000209454	0.000581324	0.00698776	0.0010592	0.000275983	0.0002154	0.00150717	0.000935322	0.000245859	0.00019802	0.000636572
Spirosoma	3.22508e-05	0	5.49919e-05	2.9289e-05	0	0.000173288	0	0	2.39705e-05	0	0	0	3.14046e-05	0	0.000101633	0	7.43218e-05	0	4.21088e-05	0	2.70449e-05	0	0	0	2.88459e-05	2.81021e-05	2.75444e-05	0	0.000355385	6.06671e-05	0	7.49738e-05	0	0	4.51753e-05	0	0	0	6.61434e-05	6.1192e-05	0.000438038	0	0.000252984	0	2.53306e-05	0.000467661	0	0	0.000148985
Erythrobacter	0.00387009	0.000891129	0.00321703	0.000146445	0.000374904	9.45209e-05	0.001724	0.00351723	4.79409e-05	9.37544e-05	0	0.00297048	0.0105048	0.000338753	0.00076951	0.00124812	0.00143689	0.000480794	0.00397928	0.00964158	0.00251518	0.0012366	0.00246516	0.00231095	0.00102884	0.00144726	0.00228619	0.00137423	0.00840485	0.00310616	0.00524161	0.00611036	0.00183999	0.000941726	0.00465305	0.0111247	0.00175274	0.00546615	0.0070553	3.0596e-05	0.000125154	7.06136e-05	0.000206987	4.30799e-05	0.000531942	0.000140298	0.00292443	0.00347949	0.00132732
gas	0	0	5.49919e-05	0	6.52007e-05	0	6.0847e-05	0.000260535	3.59557e-05	3.12515e-05	0	0	0	0	0	0.000356606	0	0	0	5.37634e-05	9.46573e-05	0	0.000170853	0	0	0	0	4.16432e-05	0	4.85337e-05	4.99201e-05	0	3.91486e-05	0	0	0	0	0.000161296	3.30717e-05	0.000260066	0.000417179	0.00150306	0.00280582	0.000416439	6.33264e-05	0.000140298	2.58799e-05	0	0
Alkaliflexus	4.83762e-05	0.000691393	8.24878e-05	0.000131801	0.000652007	0.000724661	0.000547623	0.000282247	0.00027566	3.12515e-05	0.000123778	0.000350292	7.85114e-05	0.000274229	0.000130672	0.000254719	0	0.000253049	6.31632e-05	0	6.76123e-05	5.15251e-05	7.32225e-05	9.52971e-05	0.000105768	0.000421532	0.000179039	0.00064547	3.55385e-05	0	0	7.49738e-05	0.000404536	0.000169511	0	0	0.000406432	3.58436e-05	6.61434e-05	0.00221821	0	0.000403506	0.00119592	0.0019386	0.000582603	0.00112239	0	2.82885e-05	0.000148985
Roseovarius	0.00109653	0.00173616	0.00153977	0.00112763	0.000505306	0.0022685	0.00144005	0.00319156	0.000898893	0.00139069	0.00290878	0.00138716	0.00215121	0.00241967	0.00137931	0.000356606	0.000520253	0.0010375	0.000842176	0.00870968	0.00102771	0.000618302	0.000659003	0.00119121	0.00103845	0.0019531	0.00168021	0.0010619	0.00360716	0.00137108	0.00147264	0.00318638	0.000939568	0.0010359	0.00298157	0.00281524	0.00101608	0.00505394	0.00216068	0.00212642	0.00102209	0.00290525	0.0016329	0.00149344	0.00257105	0.00116915	0.00458075	0.0051768	0.00333184
Ectothiorhodospiraceae_Group	0.000435386	3.07286e-05	8.24878e-05	0.000322179	0	9.45209e-05	0.000385364	0.000607916	8.38966e-05	4.68772e-05	0.000557	0.000210175	0.000612389	0.000371016	0.00015971	0.000127359	0.000247739	0	0.000800067	0.000250896	0.00016227	0.000618302	4.8815e-05	0.00116739	0.000124999	0.000252919	0.000137722	0.000104108	0.000835155	0.000145601	0.000399361	0.000787224	0.000130495	0.000113007	0.00131008	0.000635699	0.00012701	0.00103946	0.000606314	9.1788e-05	0.00260737	0.00013114	0.000275983	0.00020104	0.00045595	0.00107562	6.46998e-05	0	0.000325058
Grimontia	0.000306382	3.07286e-05	0	0.000351468	0.00115731	0.000110274	0.000121694	0.000108556	0.000155808	0.000250012	0	0.000322269	9.42137e-05	0.0024358	0.000551724	0.000152831	0.000297287	0.00015183	0.000231598	0	6.76123e-05	0.000283388	9.763e-05	0.000119121	0.000451919	4.21532e-05	0.000289216	0.000270681	0.00047977	2.42668e-05	0.00109824	0	0.000313189	0.000113007	3.01169e-05	0.00138492	0.000101608	0.000107531	0.000187406	0.00015298	0.000730064	0.00060526	0.000367977	0.000330279	0.000645929	0.000514427	2.58799e-05	5.65771e-05	0.000270882
Methylotenera	9.67523e-05	0.0017208	0.000219968	0.000351468	0.000423805	0.000409591	0.000709882	0.00132439	0.000587276	0.00300014	0.00102117	0.001205	0.00200989	0.00029036	0.000624319	5.09437e-05	0.000148644	0.000506098	0.000168435	0.000394265	5.40899e-05	0.000618302	9.763e-05	0.00273979	0.000249998	0.00151751	0.000495799	0.000312324	0	0.000109201	0.000224641	0.000356125	0.000482833	0.000263683	0.000225876	0.000249739	0.000304824	0.000232983	0	0.000749602	0.000187731	0.000221929	0.00048297	0.00017232	0.000341963	0.000561193	0.000828157	0.00029703	0.00104289
Ekhidna	0.000112878	0	5.49919e-05	0	0.000260803	0	0	8.68451e-05	0.000167793	0	0.0002785	0.000210175	4.71069e-05	0.000919473	0.000362976	0.000127359	0.000247739	0	0.000231598	0.000107527	0.000459764	0.000283388	9.763e-05	0	0.000182691	2.81021e-05	4.13166e-05	0.000249859	5.33077e-05	0.000715872	0.000474241	0	0.000313189	3.7669e-05	0.000255993	0.000612996	0.000101608	0.000412201	0.000264574	0	0.000146013	0	0	0	5.06611e-05	9.35322e-05	0	0	0
Arctic95A_2	0	0	0.000109984	0	0	0	0	0	0	0	0	8.40701e-05	3.14046e-05	0	0	0.00124812	0	0	8.42176e-05	7.16846e-05	0.00163622	0.000772877	0.00190379	0.000929147	0	0	0	0.000832865	0	0.000667338	0.00109824	0	7.82973e-05	0.000565036	0	0.000908141	0	0.000125453	5.51195e-05	3.0596e-05	4.17179e-05	0	0	0	0	0	0	0	0
S25_1238_Group	0	0	0	0	0	0	0	0	0	0	0	0	0	0	2.90381e-05	0	0	0	0	0	0	0	0	0	0	0	0	0	0	0	0	0	0	0.000131842	0	0	0	0	0	0	0	0	0	0	0	0	0	0	0
Nitrosomonas	0	3.07286e-05	0	0.000790803	0	0.000897949	0	0	0	0	0	0	0	6.45245e-05	0	5.09437e-05	0.000842314	0.00645276	0.000442142	0	5.40899e-05	7.72877e-05	0	0.000595607	0	2.81021e-05	5.50888e-05	4.16432e-05	0.000231	3.64003e-05	9.98403e-05	0	2.60991e-05	0.00231665	0	9.08141e-05	0.00106688	0	0	0	0	0	0	0	0	0	5.17598e-05	0	0
Stella	0.000241881	0.000153643	0.000302455	0	0	0	0.000223106	0	0	0	0.000185667	0.000392327	4.71069e-05	0.000209704	0	0	0.000173418	0	0.00018949	0.000448029	6.76123e-05	0.000128813	4.8815e-05	0.00033354	0	0.000281021	2.75444e-05	0	0.000426462	0.000121334	0.00017472	0.000562303	0.000104396	0.000131842	0.00210818	0.000340553	0.00025402	0.00030467	0.000176382	0	0	0	0	0	0	0	0	0	2.70882e-05
Porticoccus	9.67523e-05	0.000384107	5.49919e-05	0.00101047	0.000749808	0.00115	0.000202823	0.000694761	0.000826981	0.00259387	0.000433222	0.00212978	0.000863626	0.000112918	0.000348457	0.000178303	9.90958e-05	0.000556708	8.42176e-05	0.000197133	0.000121702	0.000154575	0.00019526	0.000142946	0.000144229	0.000590145	0.000289216	0.000395611	5.33077e-05	6.06671e-05	0.000549121	0.000112461	0.000404536	0.000339021	0.000105409	0.000749217	0.00012701	0.000143374	6.61434e-05	0.000749602	4.17179e-05	0.000554821	0.000252984	0.000459519	0.000468615	0.000327363	5.17598e-05	0.000664781	0.000338602
MSBL1_Group	0	0	5.49919e-05	0.00219668	6.52007e-05	0.000173288	6.0847e-05	0	0.000131838	0.000312515	0	4.20351e-05	0	0.00043554	8.71143e-05	7.64156e-05	0	0.00015183	0	8.96057e-05	2.70449e-05	0	9.763e-05	4.76485e-05	0	0	0	0	0	3.64003e-05	0.000374401	3.74869e-05	5.21982e-05	3.7669e-05	0.00290628	0.00038596	0	0.00019714	8.81912e-05	6.1192e-05	0.00373376	3.0263e-05	0	0.00011488	0.00214043	0	0.00010352	0	4.06322e-05
Gilvibacter	6.45016e-05	0.000307286	0.000274959	0	3.26004e-05	0.00124453	0.000243388	0.000412514	4.79409e-05	0	0	0.000308257	0.000439664	3.22622e-05	0.000188748	7.64156e-05	0	0.00010122	0.000210544	0.000197133	0	0	9.763e-05	0	0.000124999	0.000238868	0.0002479	0	0.000781847	7.28005e-05	0	0.000281152	3.91486e-05	3.7669e-05	7.52921e-05	0.000272442	0.000177814	0.000161296	7.71673e-05	0.000642516	0.000187731	0.00118026	0.000459971	0.000603119	0.000303967	0.000748258	5.17598e-05	8.48656e-05	0.00066366
Hyphomonadaceae_Group	0.00080627	0.000138279	0.00107234	0.000102512	0	0.000567126	0.0003448	0.000564493	9.58819e-05	0.000187509	0.000216611	0.000616514	0.00128759	3.22622e-05	0.000217786	0	0.000421157	0.000404879	0.000842176	0.00182796	0.000527376	0.000206101	0.000244075	0.000738552	5.76918e-05	0.000337225	0.000991599	0.000208216	0.000373154	0.000715872	0.000499201	0.000918429	0.000274041	0.000131842	0.000662571	0.00111247	0.00025402	0.00102154	0.00110239	3.0596e-05	0.000104295	0.000100877	0.000229986	5.74399e-05	0.000379958	9.35322e-05	0.000879917	0.00178218	0.000555307
Spongiispira	0	0	0	4.39335e-05	0	0	0	0	3.59557e-05	0	0	0	0	3.22622e-05	2.90381e-05	0.000203775	0	5.06098e-05	0.000231598	0	0	0	9.763e-05	0	0	0	0	0	0	0	0.000324481	0	0	0	0	4.54071e-05	0	0	0	0	0.00277424	7.06136e-05	4.59971e-05	0	0	0	0	0	0
Azotobacter	0.000290257	0.000706757	8.24878e-05	0.00074687	0	0	0.000121694	0.000738184	5.99262e-05	0	0.000154722	0	4.71069e-05	0	0	0	0.00012387	0.000126525	6.31632e-05	0.000770609	0.000121702	0.000180338	7.32225e-05	0.000214418	5.76918e-05	0.000730655	0.000192811	6.24649e-05	8.88462e-05	0.000182001	0.00017472	0.000337382	3.91486e-05	0	0.00158113	0.000181628	0.000203216	0.000591419	0.000220478	0.00022947	0.00277424	0.000514471	0.000459971	0.00015796	0.000443285	0.000935322	0.000659938	0.000254597	0.000176073
Candidatus_Mesochlamydia	0	0	0	0	0	0	0	0	0	0	6.18888e-05	0	7.85114e-05	0	0	0	0	0	6.31632e-05	0	0	0	0	0	0	2.81021e-05	0	8.32865e-05	0.000266539	0	0	7.49738e-05	0	0	3.01169e-05	0	0	0	0	0	0	0	0	0	0	0	2.58799e-05	0	0
Arenicella	0	0	8.24878e-05	8.7867e-05	0	0.000252056	0	0.000130268	0	0	0	0	0	0	0	0	0	5.06098e-05	0	0	0	0	0	0	0	8.43064e-05	0	6.24649e-05	0	2.42668e-05	0	0	6.52477e-05	0	0	0	0	0	0	0.000826092	0.000375462	0.00017149	0.00101194	0.000416439	0.000405289	0.00257214	3.88199e-05	2.82885e-05	0.000216705
TK06_Group	0.00020963	3.07286e-05	0.000302455	4.39335e-05	0.000130401	0.000330823	0.000223106	0.00017369	2.39705e-05	6.25029e-05	0	0.000770643	0.000282641	0	0	0.002267	0.000322061	0.00265702	0.000863231	0.000250896	0.00164974	0.00267931	0.00463743	0.00119121	0	0.000154562	0	0.000728757	0.000444231	0.00121334	0.00192192	0.000224921	0.000117446	0.00201529	0.000120467	6.81106e-05	0.00139711	0.000125453	0.000264574	7.649e-05	0.000104295	0	0	0.00011488	0	0.000748258	0	0	0
Cycloclasticus	0	0.000184371	0	7.32225e-05	0.000244503	4.72605e-05	0	6.51339e-05	0.000383527	0.000156257	9.28333e-05	7.00584e-05	6.28091e-05	0.000193573	0.000130672	0.000101887	0	0.000404879	4.21088e-05	0	0	0	4.8815e-05	0	0.000230767	7.02553e-05	0	0.000166573	0	2.42668e-05	7.48802e-05	9.37172e-05	0.000130495	0	0	9.08141e-05	0	0.000125453	7.71673e-05	9.1788e-05	0.000146013	0.000201753	0.000298981	0.000488239	6.33264e-05	0.000701492	5.17598e-05	0.000311174	0
Chrysodidymus	0	0	5.49919e-05	0.00164018	0	4.72605e-05	0	0	0	4.68772e-05	0	4.20351e-05	0.000157023	0	0	0	0	5.06098e-05	0	3.58423e-05	0	0	0	0	0	0	0	0	0	0	7.48802e-05	0	0	0	0.00191242	9.08141e-05	0	7.16872e-05	0	7.649e-05	0.00133497	0	0.00016099	0.00012924	0.000683925	0	7.76398e-05	5.65771e-05	5.41763e-05
Nautella	0	0.000122914	0	0.000190379	3.26004e-05	0	0	4.34226e-05	0.000131838	0.000187509	0	5.60467e-05	3.14046e-05	8.06556e-05	4.35572e-05	0	0	0	0.000463197	8.96057e-05	0	5.15251e-05	0	0	1.92306e-05	0.000168613	0	8.32865e-05	0.00231	0	0	0	2.60991e-05	0	0.000376461	0	0	7.16872e-05	0	0.000137682	0	0.000100877	0	0	7.59917e-05	0	3.88199e-05	0	0
Fulvimonas	0.000580514	6.14571e-05	0.00104485	0	0	0	0.000283953	0.000694761	0	0	0	0.000966806	0.00197849	0	0.000290381	0	0.000421157	0.000177134	0.000505306	0.00130824	0.000338062	0.000257626	0	0.000190594	6.7307e-05	9.83574e-05	0.00152872	0	0.000390923	0.000509604	0	0.000618534	0	0.00020718	0.000466811	6.81106e-05	0.000228618	0.000627263	0.000727577	0	0	0	0	0	2.53306e-05	0	3.88199e-05	7.07214e-05	2.70882e-05
Leptospira	0	0	0.000109984	0	0	0	0	4.34226e-05	0	0	0	5.60467e-05	0	0	0	0	0	0	0	0	0	0	0	0	0	0	0	0	0	0	0	0	2.60991e-05	0	0	4.54071e-05	0	3.58436e-05	0	0	0	0	0	0	0	0	0	2.82885e-05	0
Hyphomonas	0.000258006	0.000368743	0.00129231	0.00165483	9.78011e-05	0.000456851	0.000425929	0.00184546	5.99262e-05	4.68772e-05	0.000247555	0.00025221	0.000675198	9.67867e-05	2.90381e-05	0.000101887	0.000173418	0	0.000505306	0.00274194	0.000689646	0.000128813	0.00039052	0.000405013	4.80765e-05	0.000814962	0.000192811	0.000166573	0.000284308	0.000812939	0.000374401	0.00159319	0.000156595	9.41726e-05	0.0030418	0.000658403	0.000863668	0.00172049	0.00212761	0.000321258	0.000438038	0.000242104	0.000551965	0.00012924	0.000861239	0.000420895	0.00319617	0.00548798	0.00406322
Vogesella	6.45016e-05	0	0	0.000571136	0	0	8.11293e-05	6.51339e-05	0	0	0	2.80234e-05	3.14046e-05	0.00206478	0	0	0	0	0	0.000107527	0	0.00010305	0.000439335	4.76485e-05	0	0	0	0	0	3.64003e-05	0.0013728	0.000112461	0	0	0.000225876	0.00306498	0	0.000125453	0	0	0	0	0.000252984	8.61599e-05	0.000810578	9.35322e-05	0.000711698	0.000240453	0.000514675
Holosporaceae_Group	0	3.07286e-05	0	5.8578e-05	3.26004e-05	6.3014e-05	0.000101412	0	8.38966e-05	0	0.000340389	0.000210175	0.000235534	0	0	0	7.43218e-05	0	6.31632e-05	0	0	0.000128813	0	0	0	0	0	4.16432e-05	0	0	4.99201e-05	5.62303e-05	2.60991e-05	3.7669e-05	0	0.000181628	0	0	0	0.00038245	0.00348345	8.07013e-05	9.19942e-05	7.17999e-05	0.00122853	0.00084179	0	2.82885e-05	4.06322e-05
Asticcacaulis	0.000193505	6.14571e-05	0	5.8578e-05	6.52007e-05	0	0.000202823	0.000217113	4.79409e-05	0	0	9.80818e-05	0.000219832	3.22622e-05	0	0	7.43218e-05	5.06098e-05	0.00130537	0.000645161	0.000121702	0.00154575	0	0.000214418	0.000144229	0.00012646	0.000289216	0.00012493	0.000657462	0.000109201	4.99201e-05	0.000730994	0	0	0.000707746	4.54071e-05	5.0804e-05	0.000286749	0.000154335	0	0	0	6.89957e-05	0	7.59917e-05	0	0.0010999	0.001471	0.000541763
Ferruginibacter	0.000129003	0.00130596	0	0.000410046	0.000668308	0.000110274	0.000425929	0.000130268	0.000299631	0.000515649	0.00129967	0.00025221	0.000800817	0.000919473	0.000972777	0	4.95479e-05	0.00010122	0.000210544	0	6.76123e-05	0.00010305	7.32225e-05	0	0.00116345	0.000871166	0.00037185	0.000187395	0.000355385	0	9.98403e-05	3.74869e-05	0.000469784	0.00020718	7.52921e-05	9.08141e-05	7.6206e-05	0	5.51195e-05	0.00030596	0	6.0526e-05	0.000183988	0.0002154	3.79958e-05	0.00107562	0	0	2.70882e-05
Gemmata	0	0.000261193	0.000329951	0.000556491	0.000146702	0.000472605	0.000121694	0.000238824	0.000203749	0.000281263	0.000154722	0.000518432	9.42137e-05	9.67867e-05	0.000101633	0.000331134	9.90958e-05	0.000379574	0.000357925	0.000555556	0.000283972	0.000541014	0.000268483	0.00033354	0.000173075	4.21532e-05	4.13166e-05	0.000104108	5.33077e-05	9.70674e-05	9.98403e-05	0.000262408	5.21982e-05	0.000131842	0.00159619	0.000204332	0.000330226	0.000268827	0.000286621	0.000198874	0.00104295	4.03506e-05	6.89957e-05	4.30799e-05	0.000253306	0	0.00014234	4.24328e-05	5.41763e-05
Candidatus_Puniceispirillum	0	0.000384107	0	0.000102512	3.26004e-05	4.72605e-05	0	4.34226e-05	0	6.25029e-05	0.000959277	0	0.000251237	0.000403278	0.000725953	0.000101887	4.95479e-05	5.06098e-05	4.21088e-05	7.16846e-05	0	0	0	4.76485e-05	0.000153845	0.000309123	0	4.16432e-05	3.55385e-05	0	0	3.74869e-05	0	0.000150676	6.02337e-05	9.08141e-05	0	7.16872e-05	3.30717e-05	3.0596e-05	0	0	4.59971e-05	5.74399e-05	0	0.000187064	3.88199e-05	2.82885e-05	0.000148985
Blautia	0	0	0	4.39335e-05	0	0	0	0	0	0	0	0	0	4.83933e-05	0	0.000101887	0	0	4.21088e-05	3.58423e-05	0	0	0.000122038	0.000309716	0	0	0	6.24649e-05	0	6.06671e-05	0.000199681	0.00194932	5.21982e-05	0	0.000557162	0.00031785	5.0804e-05	0.000448045	0.000242526	0.00015298	0.000521474	0.000211841	0	2.872e-05	0.000557272	0	0.000414079	0.000480905	5.41763e-05
Comamonas	0	3.07286e-05	5.49919e-05	0.0109394	0	0	0	0.000108556	0	0	0	0.000224187	0.000329748	0.000983998	2.90381e-05	0	0.000148644	0	8.42176e-05	0.000340502	2.70449e-05	0.000128813	0.000244075	9.52971e-05	0	9.83574e-05	0	0	0	3.64003e-05	0.000648962	0.000281152	3.91486e-05	0	0.000346344	0.0012941	5.0804e-05	0.000609341	7.71673e-05	0	0.000187731	0	0.000137991	2.872e-05	0.000557272	0	0.000517598	0.000311174	0.00036569
Crocinitomix	0.00164479	0.000199736	0.00371195	0	0	0.000220549	0.000223106	0.000217113	5.99262e-05	0	9.28333e-05	0.00117698	0.00124048	0.000887211	0.000406534	0.000280191	0.00128824	0.000683233	0.000421088	0.000215054	0.00128463	0.000566777	0.000146445	0.000595607	6.7307e-05	0.000224817	5.50888e-05	6.24649e-05	0.00126162	0.00174721	0.0001248	0.000487329	0	0.000565036	0.00385496	0.000590292	0.0012955	0.000483888	0.00145515	9.1788e-05	0.00120982	0.000232016	0.000206987	0.000330279	0.000151983	0.00159005	0	2.82885e-05	8.12645e-05
Aliiglaciecola	0	0	0	0	0	0	0	0	0	0	0	0	0	8.06556e-05	0.000217786	0	0	0	0.000105272	0	0	0.000128813	0	0	3.84612e-05	0	4.13166e-05	8.32865e-05	0	0	0.00017472	0	0	3.7669e-05	0	0.000499478	0	0	2.20478e-05	7.649e-05	0.00060491	0.000595172	0.000229986	0	0.000139318	0	0	0	0
Pleomorphomonas	0.000290257	0.000199736	8.24878e-05	7.32225e-05	0	0	8.11293e-05	0	4.79409e-05	3.12515e-05	6.18888e-05	8.40701e-05	7.85114e-05	0	0	5.09437e-05	0.00012387	0	0.000126326	0.000250896	2.70449e-05	0.00010305	0	0	0	0.000182664	2.75444e-05	4.16432e-05	8.88462e-05	7.28005e-05	9.98403e-05	0.000431099	0	0	0.000406578	0.000158925	5.0804e-05	0.000179218	0.000220478	3.0596e-05	0	0	0	0	0.000151983	9.35322e-05	0.00151398	0.000820368	0.000257338
Azoarcus	0	0	5.49919e-05	0.000146445	8.15009e-05	0	0	0.000303958	0	0	0	5.60467e-05	0	0.000483933	0	0.000713212	0	0	0	0.000358423	0	7.72877e-05	0.00231871	0	0	0.000168613	0	0.00112437	0	7.28005e-05	0.00851138	0.000131204	0.00058723	0	0.000301169	0.0133724	0	8.96089e-05	2.20478e-05	0	4.17179e-05	0	0	0	2.53306e-05	0	6.46998e-05	0	8.12645e-05
Helicobacter	0	0	0	0	0	0	0	0	0	0	0	0	0	0	0	0	0	0	0	0	0	0	0	0	0	0	0	0	0	0	0	0	0	0	0	0	0	0	0	0	0	0	0	0	0.00300167	0	0.00359731	0.00280057	0
Candidatus_Fritschea	0	0.000153643	0.000109984	0	0	0	0.00026367	4.34226e-05	8.38966e-05	0	9.28333e-05	8.40701e-05	7.85114e-05	6.45245e-05	0	0.000152831	0	5.06098e-05	0.000210544	0.000215054	0.000121702	0.000128813	4.8815e-05	0.000810025	0	2.81021e-05	0	0.000208216	0.000284308	0.000133468	0.000299521	0.000955915	9.13468e-05	0	0.000301169	0.000181628	0	0.000232983	0.000121263	6.1192e-05	0	0	0	0	2.53306e-05	0	5.17598e-05	0	0
Sphingopyxis	0.00167704	0.000353379	0.000962358	0.000278246	9.78011e-05	0.000126028	0.00115609	0.00188888	0.000155808	0.000312515	0	0.00100884	0.00232394	0.000225836	0.000101633	5.09437e-05	0.000445931	5.06098e-05	0.00138959	0.00448029	0.000324539	0.000257626	7.32225e-05	0.00102444	0.000115384	0.000716604	0.000358077	0.00012493	0.00209677	0.000946407	0.000624002	0.00363623	0.000182694	0.00020718	0.00343332	0.000681106	0.00038103	0.00254489	0.00173075	7.649e-05	0.00060491	6.0526e-05	0.000735954	2.872e-05	0.000493946	0.000561193	0.00376553	0.00328147	0.00188263
Pseudacidovorax	0	0	0	5.8578e-05	0	0	0	0	0	0	0	0	0	0	0	0	0	0	0	0	0	0	0	0	0	0	0	0	0	0	0	0	0	0	6.02337e-05	0	0	0	0	0	0	0	0	0	0	0	0	0	2.70882e-05
JL_ETNP_F27	0.00174154	0	0.00151228	0	0	0	0	0	2.39705e-05	7.81287e-05	0	0	0	0	0	0.00155378	0.00242785	0.00121464	0.000147381	7.16846e-05	0.00224473	0.00175185	0.00266042	0.00164387	6.7307e-05	5.62042e-05	0	0.000999438	3.55385e-05	0.00190495	0.0016224	5.62303e-05	0.000391486	0.000169511	0	0.000476774	0.00320065	0.000788559	0.000804745	0.00015298	0.00143927	0.000151315	0	0	0	0	0	0	0
Cystobacterineae_Group	0.000112878	0	0.00120982	0	0	0	6.0847e-05	0	2.39705e-05	0	9.28333e-05	2.80234e-05	0	0	2.90381e-05	0.00211416	0.000792766	0.000986892	0.000505306	0.00078853	0.00212303	0.00334913	0.00429572	0.00178682	0.000182691	2.81021e-05	0	0.00156162	0.000390923	0.00167441	0.001872	0.000374869	0.000117446	0.000696877	0.000150584	0.000113518	0.00226078	0.000788559	0.00104727	0	0.000521474	5.04383e-05	9.19942e-05	5.74399e-05	0	0	0	0	0
Primorskyibacter	0.000129003	3.07286e-05	0.000192472	7.32225e-05	0	3.1507e-05	0.000182541	0.000629627	4.79409e-05	0.000140632	0	0.000112093	7.85114e-05	3.22622e-05	4.35572e-05	0	4.95479e-05	0.00015183	0.000105272	0.00204301	0.000283972	0	4.8815e-05	7.14728e-05	0.000115384	2.81021e-05	0.000413166	0	0.000177692	0.000339736	7.48802e-05	0.000224921	2.60991e-05	5.65036e-05	0.000180701	0.000181628	5.0804e-05	0.00111115	0.000231502	4.5894e-05	8.34359e-05	5.04383e-05	9.19942e-05	0	0.00024064	9.35322e-05	0.000284679	0.000339463	0.000121897
Neisseria	0.00020963	0.000353379	0.000357447	0.00029289	0.000195602	0.000378084	0.000223106	0.00017369	0.000311616	0.000375018	0.000247555	0.000280234	0.000282641	0.00014518	0.000174229	0.000382078	0.000272513	0.000379574	0.000315816	0.000734767	0.000351584	0.000566777	0.000170853	0.000262067	2.88459e-05	0.000309123	0.000206583	0.000270681	0.000550847	0.000339736	0.00014976	0.000581047	0.000130495	0.00020718	0.000511987	0.000295146	0.000406432	0.000555575	0.000352765	0.000428344	0.000312885	0.000353068	0.000252984	0.0002872	0.00045595	0.000187064	0.00143634	0.00173975	0.000717836
Porphyrobacter	0.000370884	3.07286e-05	0.000164976	0.000322179	0	0	0.000101412	0.000195402	0	0	0	0.000196164	0.00160163	0	0.000101633	0	0	0	0.00033687	0.000824373	0.000283972	0.000128813	4.8815e-05	0.000214418	0.00016346	0.000168613	0.000275444	0	0.00129716	0.000279069	0.000199681	0.000974659	6.52477e-05	0.000188345	0.000421636	0.000158925	0.000177814	0.000752715	0.000760649	0	0.000584051	2.01753e-05	0.000229986	0	0.000531942	0	0.00595238	0.00452617	0.00260046
Agrococcus	0	0	0	0.000102512	8.15009e-05	0	0.00188626	8.68451e-05	0.000167793	6.25029e-05	0	0.00403537	0.000957839	0	0	0	0	0	0	0.00046595	0	0	0	4.76485e-05	0	2.81021e-05	5.50888e-05	6.24649e-05	0	0.000109201	0	0.000224921	0.000130495	0	0.000271052	6.81106e-05	0	0.000412201	8.81912e-05	0	0	0	0	0	0	0	7.76398e-05	0.000212164	2.70882e-05
Mesonia	0.000145129	7.68214e-05	0.00087987	0	0	3.1507e-05	0.000121694	4.34226e-05	2.39705e-05	0	0	0	6.28091e-05	0	0.000856624	0	9.90958e-05	0.0010122	0.00208439	0	0.000121702	0.000231863	4.8815e-05	0.00016677	0.000307689	9.83574e-05	0.0015838	0	0.00518862	2.42668e-05	7.48802e-05	0.000187434	0	0.000244849	3.01169e-05	0.0019525	0.00276882	7.16872e-05	0.000110239	0	0.000146013	5.04383e-05	0	2.872e-05	0	0	0	0	0
Planctomyces	0.00466024	0.0010755	0.00431686	2.9289e-05	0	0.000252056	0.000973552	0.000195402	0.000107867	0.000125006	0.000247555	0.000854713	0.000816519	8.06556e-05	0.000130672	0.00277643	0.00307197	0.00118933	0.00440037	0.00539427	0.00471934	0.00651793	0.00263601	0.00643255	5.76918e-05	0.00214981	0	0.00199888	0.00399808	0.0049747	0.00466753	0.0142075	0.000443685	0.00190229	0.00323756	0.000976252	0.00419133	0.00478512	0.00320795	4.5894e-05	0.000333744	2.01753e-05	0	0	0.000278636	9.35322e-05	0.000556418	8.48656e-05	6.77204e-05
Treponema	0	0	0	0	0	0	0	0	0	6.25029e-05	6.18888e-05	0.000196164	0.000109916	0	0	0	0	0	0.000168435	0	0	0	0.00019526	0	0	0	2.75444e-05	0	3.55385e-05	0	0.000449281	0	0	0	7.52921e-05	0.00113518	0	0	4.40956e-05	0	0	0	0	0	0	0	0	5.65771e-05	0
Sufflavibacter	0.000548263	0.000445564	0.000714895	7.32225e-05	0.000179302	0.000425344	0.000243388	0.000542782	0.000335587	7.81287e-05	6.18888e-05	0.000364304	0.000910733	0.00014518	0.00111797	0.000101887	0.000495479	0.000303659	0.000505306	0.000179211	0.000175792	0.000283388	4.8815e-05	0.000309716	0.00140383	0.000421532	0.00264426	0.00012493	0.00206123	0.000279069	4.99201e-05	0.00103089	0.000104396	0.000113007	7.52921e-05	0.000817327	0.000558844	0.000394279	0.000617338	0.000275364	0.000146013	0.000201753	0.000275983	0.0002872	0.000101322	0.000327363	0.00010352	9.90099e-05	0.000189617
Maritimibacter	0.000112878	0.000353379	0.000164976	0.000234312	0.000114101	0.000456851	0.000243388	0.000195402	0.000215734	0.000390643	0.000309444	0.000238199	0.000408259	0.000354885	0.000145191	0	4.95479e-05	0.00015183	0.00033687	0.000716846	5.40899e-05	0.00010305	0	0.000119121	9.61529e-05	0.000238868	0.000234128	0.000104108	0.00110169	6.06671e-05	0.000274561	0.000131204	0.000130495	0.000113007	0.000180701	0.000272442	0.00012701	0.000483888	0.000154335	0.000413046	6.25769e-05	0.000786838	0.000183988	0.000516959	0.000569938	0.000233831	0.000336439	0.000268741	0.000474043
Legionellaceae_Group	0.000516013	0	0.000687399	0	0	0.00130754	0.000182541	4.34226e-05	0	0	0	0.00033628	6.28091e-05	0	0	0.000178303	0.000470705	0	0.000126326	0.0011828	0.000270449	0.00110779	0	0.000238243	0	0	0	0	0.000248769	0.000364003	0.0001248	0.00114335	2.60991e-05	0.000169511	7.52921e-05	4.54071e-05	0	0.000555575	0.000220478	0	0	0	0	0	6.33264e-05	0	0	0	2.70882e-05
Gaetbulibacter	0.000177379	0.000199736	8.24878e-05	5.8578e-05	3.26004e-05	0.000283563	8.11293e-05	0.000260535	0.000131838	3.12515e-05	0	0.000294245	0.000235534	0	0.000174229	0	0.000272513	0.00010122	0.00018949	0.000232975	0.000148747	5.15251e-05	0	0	0.000134614	0.000112408	0.00037185	4.16432e-05	0.000213231	0.000133468	0	0.000149948	2.60991e-05	7.53381e-05	0	6.81106e-05	0.000177814	0.000143374	7.71673e-05	6.1192e-05	8.34359e-05	0.000332893	0.000505968	0.0002872	0.00024064	0.000748258	2.58799e-05	0.000183876	0.000257338
Oceanicoccus	0	0	0	0	0	0	0	0	0	0	0	4.20351e-05	0	4.83933e-05	0	0	0	0	0	0	0	7.72877e-05	0	4.76485e-05	0	0	0	0	0	0	0.000249601	0	0	0	0	4.54071e-05	0	0	0	4.5894e-05	0.000688346	0.000161403	0	2.872e-05	0.000101322	0	0	0	5.41763e-05
SAGMEG_1	0	0	0.000247463	0.00215274	8.15009e-05	0.000535619	0.000141976	0	2.39705e-05	0.000312515	0	0.000126105	4.71069e-05	0.000209704	2.90381e-05	0.000433022	0	0.00015183	0	7.16846e-05	2.70449e-05	0	9.763e-05	0	0	0	0	4.16432e-05	0	4.85337e-05	0.000274561	0	0	5.65036e-05	0.00237923	0.000476774	0.000152412	0.00030467	9.92151e-05	0.000107086	0.00448468	0.000110964	0.00016099	0.00011488	0.00276103	9.35322e-05	6.46998e-05	0	2.70882e-05
Rhodospirillum	0.000161254	9.21857e-05	0.000769886	0	3.26004e-05	0	4.05647e-05	6.51339e-05	3.59557e-05	4.68772e-05	0	0	3.14046e-05	3.22622e-05	7.25953e-05	0.00135001	7.43218e-05	0.000556708	0.000231598	0.000125448	0.00112236	0.00162304	0.00222108	0.00126269	0	0.000182664	0	0.00110355	0.000106615	0.000812939	0.0011232	0.000243665	0.000182694	0.000339021	0.000120467	0.000181628	0.000812864	0.00050181	0.000341741	4.5894e-05	0.000271167	3.0263e-05	0	0	0	0	5.17598e-05	7.07214e-05	4.06322e-05
Bizionia	0.000177379	0	0.000467431	8.7867e-05	0.000146702	7.87674e-05	0.000101412	0.000195402	0.000131838	0	0	4.20351e-05	0.000266939	4.83933e-05	0.000493648	7.64156e-05	0.00012387	0.000126525	0.000442142	0.000107527	0.000148747	0.00010305	0	0	0.000153845	7.02553e-05	0.000564661	0.000104108	0.00179469	7.28005e-05	0	0.000168691	0.000143545	9.41726e-05	0	0.000158925	0.000152412	0.000340514	0.000154335	9.1788e-05	4.17179e-05	8.07013e-05	0.000436972	0.00011488	0.000151983	0.000467661	2.58799e-05	0.000127298	0.000257338
Litorimicrobium	0.000306382	9.21857e-05	0.000357447	0	0	3.1507e-05	0.000202823	0.000738184	2.39705e-05	0	0	5.60467e-05	0.000109916	0.000177442	0.000116152	0	7.43218e-05	5.06098e-05	0.000168435	0.00195341	0.000175792	5.15251e-05	0	0.000142946	0.000115384	0.000140511	0.000619749	0	0.000390923	0.000230535	4.99201e-05	0.000449843	0	5.65036e-05	0.00028611	0.000136221	0.000203216	0.00129037	0.000485052	6.1192e-05	0.000166872	0.000100877	0.00016099	0	0.000341963	0.000233831	0.000841097	0.00108911	0.00036569
Candidatus_Phytoplasma	0	4.60929e-05	0	0	0	0	0	0	0	0	0	5.60467e-05	0	9.67867e-05	0	0	0	0	8.42176e-05	0	0	0	0	0	0.0011923	7.02553e-05	0	0	3.55385e-05	0	0	0	0	0	0	4.54071e-05	0	0	0	0	0	0	0	0	0	0.000140298	0	0	0
Solitalea	0.000693392	6.14571e-05	0.000219968	0	8.15009e-05	0.000598633	8.11293e-05	0.000282247	0	4.68772e-05	0	0.000588491	0.000533878	0.000548458	0.000130672	0.000127359	9.90958e-05	5.06098e-05	0.000252653	0.000125448	0.000378629	0.000231863	7.32225e-05	0.000142946	8.65376e-05	4.21532e-05	5.50888e-05	0.000229038	0.00071077	0.000218402	9.98403e-05	0.000243665	0.000130495	7.53381e-05	0.000316227	0.000363257	0.000355628	0.000268827	0.000143311	4.5894e-05	8.34359e-05	0	0	0.00027284	0	0.00112239	0	0	0.000311514
Candidatus_Blochmannia	9.67523e-05	6.14571e-05	0	0.000351468	0.000179302	0	0.000141976	0.000217113	0	3.12515e-05	0.000154722	0	4.71069e-05	0.000500065	4.35572e-05	0.000178303	0	5.06098e-05	0	0.000107527	0.000135225	0	9.763e-05	0.000452661	0	8.43064e-05	0	6.24649e-05	8.88462e-05	0	0.0001248	0.000299895	3.91486e-05	3.7669e-05	0.000421636	0.000136221	0.00012701	0.000125453	0.000132287	3.0596e-05	0	4.03506e-05	0.000229986	0	0.00045595	0	9.05797e-05	7.07214e-05	0.00102935
Succinatimonas	0	0	0	0	0	0	0	0	0	0	0	0	0	3.22622e-05	0.000275862	0.000127359	0	0	0.000147381	0	0	0.00010305	0	0	0.000269228	0	0.00012395	0	5.33077e-05	0	7.48802e-05	0	0	0	3.01169e-05	0.000204332	0	0	0	9.1788e-05	0.000688346	0.00103903	0.000505968	0.00011488	0.000139318	0.000187064	0	0	6.77204e-05
Comamonadaceae_Group	0.000112878	0.00264266	0.000109984	0.00282639	0.00115731	0.000960963	0.00162259	0.00254022	0.00161801	0.00301577	0.00219705	0.00124704	0.00172725	0.00304878	0.000972777	0.000560381	0.000148644	0.00177134	0.000484251	0.00123656	0.00010818	0.000850165	0.000536965	0.000595607	0.000605763	0.00303503	0.000661066	0.000499719	0.000231	0.000400403	0.00202177	0.000206178	0.000939568	0.000847553	0.000978798	0.00313309	0.000660452	0.00102154	0.000440956	0.000963774	0.0024405	0.000443857	0.000712955	0.000330279	0.000367293	0.000795024	0.000310559	0.000480905	0.000528219
Sagittula	0	0.000338014	0	0.000248957	0.000130401	0.000488358	0.000223106	0.000195402	0.000215734	0.000375018	0.000216611	0.000154129	0.000188427	0.000225836	0.000188748	0	0.00012387	0.000126525	0.000126326	0.000250896	9.46573e-05	0	4.8815e-05	0	0.000115384	0.000379379	0.000151494	8.32865e-05	0.000550847	2.42668e-05	9.98403e-05	0.000168691	7.82973e-05	7.53381e-05	0.000120467	9.08141e-05	0	0.000322592	9.92151e-05	0.000520132	4.17179e-05	0.000373243	0.00016099	0.00025848	0.00045595	0.000140298	0.000427019	0.000212164	0.00036569
Aggregatibacter	0.000274132	3.07286e-05	0	0.000805448	0.00146702	0.000614386	0.0010344	0.00084674	0.00188168	0.000531275	9.28333e-05	0.000392327	0.000188427	0.000612982	4.35572e-05	0.000356606	0.000222965	0.000885672	0.000484251	0	5.40899e-05	0.000154575	0.000219668	0.000476485	5.76918e-05	0.00012646	2.75444e-05	0.0007704	0.000408693	6.06671e-05	0.000499201	0.000431099	0.00108311	7.53381e-05	0.000316227	0.000454071	0.000228618	0.000268827	8.81912e-05	0.00143801	0.000500615	0.00120043	0.00400175	0.00238376	0.00129186	0.000514427	0.000271739	0.000155587	0.00073138
Nitrincola	3.22508e-05	3.07286e-05	0	0.000175734	0	0	0	0	0	0	0	0	0	0	0	0	0	0	6.31632e-05	0.000197133	0	0	0	4.76485e-05	1.92306e-05	0	5.50888e-05	0	5.33077e-05	0.000121334	0	0	6.52477e-05	0	0.000105409	0	0	8.96089e-05	3.30717e-05	3.0596e-05	0.000521474	0.000201753	0.000344978	0.00012924	0.000709256	0.000280597	0.00141046	0.000834512	0.000907453
Enterobacteriaceae_Group	0.000258006	3.07286e-05	0.000164976	0.000907959	0.000456405	0	8.11293e-05	0.000629627	0.000167793	0	0.000309444	0	0	0.000693638	0.000580762	0	0.000247739	0	0.000231598	0.000286738	0.00010818	0.000231863	4.8815e-05	0.000238243	0.000971145	5.62042e-05	0.000674838	0.000312324	0.000177692	0.000206268	0.000424321	0.000206178	0.000169644	0.000169511	0.000406578	0.000408664	0.000304824	0.000268827	0.000418908	0.000107086	0.000417179	0.000242104	0.000413974	5.74399e-05	0.000835909	0.000140298	0.000828157	0.00029703	0.000839733
Ochromonas	0	0	5.49919e-05	0.00142052	4.89006e-05	0	0.000101412	6.51339e-05	0	0.000156257	0	0.000112093	0.000141321	0.000983998	0	7.64156e-05	0	0.00010122	4.21088e-05	5.37634e-05	0	0.000180338	4.8815e-05	4.76485e-05	0	0	0	4.16432e-05	0	0	0.00017472	3.74869e-05	0	0	0.00112938	0.000113518	0	3.58436e-05	0	3.0596e-05	0.000104295	0	0.000873945	0.000861599	0.000316632	0.000233831	3.88199e-05	2.82885e-05	0.000270882
Imperialibacter	9.67523e-05	3.07286e-05	0.00013748	0.000366113	0	0	0	0	0	0	0	5.60467e-05	0	0.00029036	2.90381e-05	5.09437e-05	0.000148644	7.59148e-05	0	7.16846e-05	0.000148747	0.000257626	0.000122038	0.00016677	0	0	5.50888e-05	0.00012493	0	6.06671e-05	0.00014976	5.62303e-05	0	0	0.000135526	0	7.6206e-05	3.58436e-05	5.51195e-05	0	8.34359e-05	0	0	0	0.000113988	0	0	0	0.000284426
Neptuniibacter	0.000112878	0.000230464	0.000192472	4.39335e-05	0	0	4.05647e-05	0.000238824	0	3.12515e-05	9.28333e-05	0.000154129	7.85114e-05	9.67867e-05	0	0	9.90958e-05	5.06098e-05	0.000105272	0.000555556	5.40899e-05	0	0	0.000262067	0.000105768	0.000463685	4.13166e-05	0	0	0.000218402	0.000324481	0.000993402	3.91486e-05	0	0.00144561	0.000136221	0.000177814	0.000448045	8.81912e-05	0	0.000125154	2.01753e-05	0.00016099	7.17999e-05	0.000227975	0	0.000401139	0.000594059	0.000419866
Rhizobium	0.0020963	0.000276557	0.000962358	0.000175734	0	3.1507e-05	0.000628752	0.000825029	5.99262e-05	0	0.000123778	0.000798666	0.00111486	0.000483933	0.000203267	5.09437e-05	0.000495479	0	0.00185279	0.0021147	0.000459764	0.000541014	7.32225e-05	0.000262067	0.000201921	0.000379379	0.000302989	4.16432e-05	0.00135046	0.000291202	0.000224641	0.00249288	5.21982e-05	0	0.00201783	0.000340553	0.000152412	0.0015592	0.00135594	7.649e-05	0.000521474	0.000110964	0.000505968	4.30799e-05	0.000557272	0.00060796	0.00258799	0.00328147	0.00200452
Spongiibacteraceae_Group	0	0	0	2.9289e-05	0	3.1507e-05	0	0	0	3.12515e-05	0	0	0	0.000177442	0	0	0	0	0.000105272	0	0	0	0	0	0	0	0	0	0	2.42668e-05	0.0001248	5.62303e-05	0	0	0	0.000158925	0	0	3.30717e-05	0	0.000584051	0.000161403	4.59971e-05	7.17999e-05	7.59917e-05	0	0	0	9.48086e-05
Sandaracinaceae_Group	0.0010159	3.07286e-05	0.000274959	0	0	0.000110274	8.11293e-05	4.34226e-05	0	0	6.18888e-05	0.00147123	0.00189998	0	7.25953e-05	0.000203775	0.00109005	0.000303659	0.000947448	0.00016129	0.000189315	0.000412201	0	4.76485e-05	0	2.81021e-05	2.75444e-05	0	0.000870693	0.000315469	0	0.000449843	0	0.000433194	0.000436694	0.000113518	0.000304824	0.000107531	0.000110239	0	0	0	0	0	0	0	6.46998e-05	0	0
Balneola	0	0	0	0	4.89006e-05	0	0	0	0	0.000562526	0	0.000126105	0.000298343	0.00154859	0	0.000152831	0	0	0	0	0	5.15251e-05	0.000439335	0	0	0	0	0.000104108	0	0	0.001248	0	0.000104396	0	0	0.00158925	0	0	0	0	0	4.03506e-05	0	0	0	0	0	0	0
Melitea	6.45016e-05	0	0	0	0	6.3014e-05	0	4.34226e-05	0	0	0	0.000238199	7.85114e-05	8.06556e-05	0.000261343	0	0	0	0.000147381	0	0.000121702	5.15251e-05	9.763e-05	0.000142946	0	2.81021e-05	0	0	0.000142154	0	0.00154752	0.000131204	0	7.53381e-05	0.00019576	0.000431367	0	8.96089e-05	5.51195e-05	4.5894e-05	0.000312885	8.07013e-05	9.19942e-05	0.00020104	2.53306e-05	0.00112239	0	4.24328e-05	0
Sc_NB04_Group	3.22508e-05	0	0.00123732	0	0	0	0	0	0	0	0	0.000126105	0	0	0	0.000101887	9.90958e-05	5.06098e-05	4.21088e-05	0	8.11348e-05	0	0.000366113	0.000119121	0	0	0	0.000957795	0	2.42668e-05	0.000549121	0	0.000535032	3.7669e-05	0.000225876	0.00177088	0	0.00050181	0.000529147	0	0.000959513	0	0	0	0	0	0	0	0
Ponticaulis	0	0	0	0	0	0	0	0	0	0	0	0	0	0	0	0	0	0	0	0	0	0	0	0	0	0	0	0	0	0	0	0	0	0	0	0	0	0	0	0	0	0	0	0	0	0	0	0	0
Croceicoccus	0.000387009	6.14571e-05	0.000494927	0	0	0	0.000162259	0.000434226	2.39705e-05	7.81287e-05	0	0.000266222	0.00149172	0	5.80762e-05	0.000127359	9.90958e-05	5.06098e-05	0.000400034	0.000824373	9.46573e-05	7.72877e-05	9.763e-05	0.000119121	0.000144229	8.43064e-05	0.000302989	0.000104108	0.00129716	0.000133468	0.000274561	0.000937172	5.21982e-05	0.000188345	0.000180701	0.000522181	7.6206e-05	0.000716872	0.000970103	0	0	0	0	0	0	0	2.58799e-05	2.82885e-05	0
Taibaiella	0	3.07286e-05	0	0.00165483	4.89006e-05	0	0	0	0	0	0	0	0	0	0	0	0	0	0	0	0	0	0	0	0	4.21532e-05	0	0	0	0	0	0	0	0	0	0	0	0	0	0	0	0	0	0	3.79958e-05	0	0	0	0
Haliea	0.000467636	0.000568479	0.00074239	0.000439335	0.000668308	0.00100822	0.000730164	0.00182375	0.000359557	0.00032814	0.000123778	0.00298449	0.00106776	0.000354885	0.000246824	0.000203775	0.000421157	0.000303659	0.00052636	0.00177419	0.000540899	0.000618302	0.000317298	0.000881498	0.000336535	0.00101168	0.000454483	0.000312324	0.000177692	0.00088574	0.00297025	0.00279277	0.000521982	3.7669e-05	0.000707746	0.00272442	0.000609648	0.00111115	0.00155437	0.000321258	0.0012724	0.000252192	0.000390975	0.000560039	0.000772582	0.000748258	0.000207039	0.000834512	0.000541763
Thioalkalispira	3.22508e-05	3.07286e-05	0	4.39335e-05	0.000945411	0	0	4.34226e-05	0	3.12515e-05	0	0	3.14046e-05	0.000209704	0	0.000585853	0	0	0	5.37634e-05	2.70449e-05	5.15251e-05	0.000146445	0.000119121	0	2.81021e-05	0	0.00197805	3.55385e-05	0.000109201	0.00132288	9.37172e-05	0.000991766	7.53381e-05	9.03506e-05	0.00233846	0.000228618	3.58436e-05	4.40956e-05	0	0.000479756	5.04383e-05	0.000114993	2.872e-05	5.06611e-05	0	3.88199e-05	0	0
Aquiflexum	0	0	0	0	9.78011e-05	0	0	0	0	0	0	0	0	0	0	5.09437e-05	4.95479e-05	0	0	0	0	0	0.000317298	0	0	0	0	0.000229038	0	0	0.000549121	7.49738e-05	0.000130495	0	9.03506e-05	0.00206602	0	0	0	7.649e-05	0.00308713	6.0526e-05	0.000367977	0.00011488	2.53306e-05	0	3.88199e-05	0	4.06322e-05
Hydrogenophilaceae_Group	0.000258006	0.00132133	0.000329951	0.000849381	0.000391204	0.000299316	0.000669317	0.000564493	0.000287646	0.000468772	0.000990222	0.00172344	0.00150742	0.000129049	0.000130672	0	4.95479e-05	0.000404879	0.000168435	3.58423e-05	0.000216359	0.000515251	9.763e-05	0.00066708	0.000230767	0.00136295	0.000206583	0.000208216	0	0.000546004	0.000873602	0.000187434	0.000365387	0.000226014	0.000632454	0.00070381	0.00012701	0.000555575	0.000242526	9.1788e-05	4.17179e-05	2.01753e-05	0	0	5.06611e-05	0.000420895	7.76398e-05	0.000141443	9.48086e-05
Chitinophagaceae_Group	0.000177379	0.000138279	0.000109984	0.00432013	0.000163002	9.45209e-05	0.000405647	0.000130268	0	0	0	9.80818e-05	0.000172725	0.000112918	2.90381e-05	5.09437e-05	0.000198192	0	0.000126326	0.000215054	0.000243404	0.000283388	9.763e-05	7.14728e-05	1.92306e-05	0	4.13166e-05	0.00064547	5.33077e-05	0.000303335	0	0.000224921	0.000352338	3.7669e-05	0.000105409	0	0.000228618	7.16872e-05	0.000297645	0	0	7.06136e-05	0	0	0	0.000187064	0	4.24328e-05	0.000392778
Ectocarpus	0	0	0	0	0	3.1507e-05	0	0	0	0	0	8.40701e-05	0	0	0	0	0	0	0	0	0	0	0.000146445	0	0	0	0	0	3.55385e-05	0	0.000648962	0	2.60991e-05	0	0	0.00199791	0	0	0	0	0	0	0	0	5.06611e-05	0	0	0	0
Vadicella	8.0627e-05	3.07286e-05	5.49919e-05	0	0	0.000220549	6.0847e-05	4.34226e-05	3.59557e-05	0	0	7.00584e-05	0.000172725	4.83933e-05	5.80762e-05	0	0	0	0	5.37634e-05	0	5.15251e-05	0	0	4.80765e-05	0	0.00012395	0	0.00094177	0	0	7.49738e-05	0	3.7669e-05	0	0	0	5.37654e-05	0.000110239	3.0596e-05	0	9.0789e-05	0	0.000387719	6.33264e-05	0	5.17598e-05	4.24328e-05	4.06322e-05
B_42	0.000112878	0.000291921	0.000247463	0	3.26004e-05	0	0.00026367	0.000825029	0	0	0	0.000602502	0.000219832	0	0	0.000152831	9.90958e-05	5.06098e-05	0.000210544	0.00188172	0.000797826	0.000360676	0.000951893	0.000786201	0	0.00026697	0	0.000145751	0.000159923	0.000594538	0.000499201	0.000730994	0.000130495	7.53381e-05	0.00159619	0.000930845	0	0.00105739	0.000738601	0	8.34359e-05	0	0	0	0	0	0	0	0
Ruminiclostridium	0	3.07286e-05	0	0	0	0	0	0	0	0	0	0.000210175	0	0	0	0	0	0	0.000210544	0.000125448	2.70449e-05	0	9.763e-05	0	0	0	0	0	3.55385e-05	0	0.000748802	3.74869e-05	0	0	0.000105409	0.00204332	0	0.000107531	6.61434e-05	3.0596e-05	0	0	0	0	0.000126653	0	0.000245859	0.000212164	0
SM1A02	0.00135453	0.000245829	0.00087987	0	9.78011e-05	0	0.000385364	0.000303958	0	0.000140632	0	0.00100884	0.00089503	0.000193573	0	0.000611325	0.000445931	0.000303659	0.00145275	0.000663082	0.000419196	0.000721352	4.8815e-05	0.000810025	0.000240382	0.000365328	0	0.000395611	0.000213231	0.000910006	0.000948482	0.000749738	0.000221842	0.000339021	0.00186724	0.00154384	0.000431834	0.00109323	0.00109137	6.1192e-05	0.000271167	0	0.000114993	2.872e-05	0	0	2.58799e-05	0	5.41763e-05
Candidatus_Nitrososphaera	0.000387009	0	0.000577415	0	0	0	0	0	2.39705e-05	3.12515e-05	0	0	0	0	0	0.00135001	0.00138734	0.00220153	0.000863231	7.16846e-05	0.00147395	0.00110779	0.00144004	0.00197741	0	0	0	0.000416432	0.000426462	0.000667338	0.000474241	7.49738e-05	0	0.00265567	0	0	0.00170193	0.000125453	0.000121263	0	0.00060491	0	0	0	0	0	0	0	0
Pylaiella	0	0	0	0	0	0	0	0	0	0	0	0.000140117	0	0	0	0	0	0	0.000126326	0	0	7.72877e-05	9.763e-05	0	0	0	0	4.16432e-05	7.1077e-05	0	0.000748802	0	0	0	0	0.0019298	0	0	0	0	0	0	0	0	0	0	0	0	0
Undibacterium	3.22508e-05	0.000184371	8.24878e-05	0.000512558	0.000358604	7.87674e-05	0.000304235	0.000933585	0.000743085	0.00131256	6.18888e-05	0	0.000125618	8.06556e-05	5.80762e-05	0.000127359	0.000173418	0.000632623	0	0.000376344	5.40899e-05	0.000309151	7.32225e-05	9.52971e-05	5.76918e-05	0.000112408	0.000137722	0.00012493	0.000106615	0.000182001	0.000374401	5.62303e-05	0.000182694	0.000150676	9.03506e-05	0.000272442	0.000177814	0.00030467	0	0.000489536	0.00181473	0.00013114	0.000344978	0.000344639	0.000101322	9.35322e-05	5.17598e-05	0.00019802	0.000135441
Mamiella	0	0	0	0.000483269	0.000211902	0.00132329	0.000182541	4.34226e-05	0.00025169	0.000562526	0.000402278	0.000294245	3.14046e-05	0	0	0	0	0	8.42176e-05	0.000143369	0	0	0	0	0	0	0	6.24649e-05	0	2.42668e-05	0	0	2.60991e-05	3.7669e-05	0	0	0	0.000125453	0	0	0	0	0	0	0	0	0	0	0
Nocardia	0.000177379	7.68214e-05	0.000412439	2.9289e-05	0	0	0.000202823	4.34226e-05	0	3.12515e-05	0	0.00116297	0.00130329	0	5.80762e-05	5.09437e-05	0.000470705	0	0.00206333	0.000681004	0	0.00105627	0	0.000119121	7.69223e-05	0.000224817	8.26332e-05	0	0.000817385	0.000145601	4.99201e-05	0.000562303	0	9.41726e-05	0.000346344	0	0.00012701	0.000573497	0.000661434	4.5894e-05	4.17179e-05	0	0	0	0	0	0	2.82885e-05	0
Nevskia	0.000112878	0	8.24878e-05	0	6.52007e-05	0	8.11293e-05	0	0	7.81287e-05	6.18888e-05	0.00025221	0.000125618	4.83933e-05	0	5.09437e-05	0	0	0.000400034	0.000107527	2.70449e-05	0.00151999	4.8815e-05	9.52971e-05	0	5.62042e-05	0	0	3.55385e-05	6.06671e-05	7.48802e-05	0.000243665	0	0	0.000150584	0.000113518	0	0.000107531	4.40956e-05	0	4.17179e-05	0	9.19942e-05	0.0002154	0	9.35322e-05	5.17598e-05	0	0
Luteimonas	0.000435386	0.000245829	0.000412439	8.7867e-05	0	0	0.000243388	0.000369092	0	7.81287e-05	0.000123778	0.000630526	0.00106776	0	0.0003049	0	0.000222965	5.06098e-05	0.000315816	0.00111111	0.000365107	0.000463726	0	0.000476485	1.92306e-05	0.000323174	0.000716155	4.16432e-05	3.55385e-05	0.000582404	9.98403e-05	0.00059979	5.21982e-05	7.53381e-05	0.0024997	0.000272442	0.000279422	0.000609341	0.000363789	3.0596e-05	0.000104295	0.000121052	0	0	0.000101322	0	0.00014234	0.000282885	6.77204e-05
Hylemonella	0	0	0	0.00188914	0	0	0	4.34226e-05	0	0	0	5.60467e-05	3.14046e-05	0	0	0	0	0	0	3.58423e-05	0	0	0	0	0	0	0	0	0	0	0	0	0	0	0	4.54071e-05	0	3.58436e-05	2.20478e-05	0	0	0	0	0	3.79958e-05	0	5.17598e-05	2.82885e-05	0
Lutibacterium	0.000193505	9.21857e-05	0.000412439	0	0.000195602	0	0	0.000217113	2.39705e-05	0	0	8.40701e-05	0.000643794	6.45245e-05	2.90381e-05	0.000280191	0	0	0.000231598	0.000949821	0.00016227	0	0.000634595	0.000190594	0	7.02553e-05	8.26332e-05	0.000437254	8.88462e-05	8.49339e-05	0.000948482	0.000730994	0.000443685	0	0.000361402	0.00340553	0.000152412	0.000591419	0.000463004	0	0	0	0	0	7.59917e-05	0.000420895	0.000414079	0.000678925	5.41763e-05
Phyllobacteriaceae_Group	0.000548263	0.000169007	0.00104485	2.9289e-05	0	0.000126028	0.000121694	0.000412514	0	0	6.18888e-05	0.000294245	0.000219832	0.000274229	0	5.09437e-05	0.000198192	0.00015183	0.000231598	0.00150538	0.000283972	0	0	0.000190594	3.84612e-05	0.000491787	0.000137722	0.000104108	0.000462	0.000230535	0	0.000862198	7.82973e-05	3.7669e-05	0.00215336	0.000340553	0.00012701	0.00103946	0.00070553	3.0596e-05	0.00020859	0	4.59971e-05	0	7.59917e-05	0	0.000168219	0.000212164	0.000203161
Prolixibacter	0	0	0	0	3.26004e-05	0	0	0	0	0	0	0	0	0	0	5.09437e-05	0	0	0	0	4.05674e-05	0	0	0	0	0	0	0.000166573	0	0	0	0	3.91486e-05	0	0	0	0	0	0	0	0	0	0	0	0	0	0	0	0
Legionella	0.000435386	0.000122914	0.000109984	0.000131801	4.89006e-05	0.000141781	4.05647e-05	8.68451e-05	0	0	6.18888e-05	0.000126105	4.71069e-05	8.06556e-05	8.71143e-05	7.64156e-05	0.00012387	5.06098e-05	0.000252653	0.000358423	6.76123e-05	0.000206101	0.000146445	0.000214418	0.000807685	0.000337225	5.50888e-05	4.16432e-05	0.000159923	0.000169868	0.000549121	0.00054356	2.60991e-05	3.7669e-05	0.00124985	0.000249739	0.000330226	0.000430123	0.000242526	9.1788e-05	0.00135583	9.0789e-05	0.00016099	4.30799e-05	0.000151983	0.000467661	0.000232919	0.000141443	0.000121897
Chattonella	0	3.07286e-05	0	0.000190379	0	3.1507e-05	4.05647e-05	0	0	3.12515e-05	0	0	0	8.06556e-05	0	0	0	0	6.31632e-05	0	0	0	0	4.76485e-05	0	0	0	0	0	0	7.48802e-05	0	0	3.7669e-05	0.000783038	0.000158925	0	5.37654e-05	0	0	0.00164786	0	0.000137991	0	5.06611e-05	0.000187064	3.88199e-05	0	8.12645e-05
Pseudomonadales	0.000225755	0	5.49919e-05	0	0	0	0	6.51339e-05	0	0	0	0.000448374	0.000329748	0.00014518	4.35572e-05	0	0.00012387	0	0.000168435	0	5.40899e-05	0.000437964	7.32225e-05	0.000381188	1.92306e-05	0	2.75444e-05	0	0.000302077	0	0.000424321	9.37172e-05	0	0	3.01169e-05	0.000113518	7.6206e-05	3.58436e-05	7.71673e-05	7.649e-05	0.00020859	0	0.000344978	4.30799e-05	2.53306e-05	0	0	0	0
Luteibaculum	8.0627e-05	0	0	0	0	0	0	0	0	0	0	0.000154129	0.000109916	0.000112918	0	0	0	0	0	0	0	7.72877e-05	0	4.76485e-05	0	0	0	0	0.000248769	0	0	0	0	0	0	4.54071e-05	0	0	3.30717e-05	0	0	0	0	0	6.33264e-05	0.000374129	0	0	8.12645e-05
Ulvophyceae_Group	0	4.60929e-05	0	0.000102512	0	0	0	4.34226e-05	0	0	0	0	3.14046e-05	0	0	0	0	0	0	0	2.70449e-05	0	0	0	0	0.000154562	0	0	0	0	0	0	0	0	0	0	0	0	2.20478e-05	0	0.00164786	0	0	0	3.79958e-05	0	0	0	2.70882e-05
Leucothrix	0	0	0	0	0	0.00212672	0	0	0	0	0	0	0	0	0	0	0	0	0	0	0	0	0	0	0	0	0	0	0	0	0	0	0	0	4.51753e-05	0	0	0	0	0	0	0	0	0	0	0	5.17598e-05	2.82885e-05	0
Puniceicoccaceae_Group	0	0	0	2.9289e-05	6.52007e-05	0.000126028	0	0	0	6.25029e-05	0	7.00584e-05	3.14046e-05	0	2.90381e-05	0.00040755	0.000148644	0.000708538	0.000168435	3.58423e-05	0.00016227	0.000541014	0.00078104	0.000262067	3.84612e-05	0	4.13166e-05	0.000249859	5.33077e-05	0.000327602	0.000249601	0	2.60991e-05	0.000263683	0	0.000227035	0.00088907	0	0	9.1788e-05	0	0	0	0	0	0	3.88199e-05	0	0
Thalassotalea	0	0	0	0	9.78011e-05	0	0	0	0	0	6.18888e-05	0	0	6.45245e-05	0.0003049	0	4.95479e-05	0	0.000357925	0	0	0	0	0	9.61529e-05	0	0	4.16432e-05	0.000337616	0	0	0	0	0	0	0.000476774	0	0	0	0.000168278	0.000834359	0.000978503	0.000344978	2.872e-05	0	0	0	2.82885e-05	5.41763e-05
Intrasporangium	0	0.000184371	0	0	0	0	8.11293e-05	0	0	0	0	8.40701e-05	6.28091e-05	0	0	5.09437e-05	0	0	6.31632e-05	3.58423e-05	2.70449e-05	0	0	4.76485e-05	0.000134614	0.000379379	0	0	7.1077e-05	0	0	3.74869e-05	5.21982e-05	0	0	0	0	5.37654e-05	3.30717e-05	0	0	0	0	0	0	9.35322e-05	0	0	0
Acholeplasma	0	0	0	0.000175734	0.000244503	0	0	0	0	0	0.000495111	0	0	3.22622e-05	0	0.00206322	0	0	0	0	5.40899e-05	5.15251e-05	9.763e-05	4.76485e-05	0	0	0	0.00166573	0	0	0.000898562	0	0.00126581	0	6.02337e-05	0.000363257	0	0	2.20478e-05	0	0	0	0	0	0	0	0	0	0
Litoricola	6.45016e-05	0.00155179	5.49919e-05	0.000424691	0.000472705	0.000126028	0.000182541	0.000521071	0.00115058	0.000312515	0.00259933	0.00162536	0.00128759	0.000193573	0.00100181	0.000280191	0.000272513	0.000860367	0.000210544	0	0.00016227	0.00010305	0.000317298	0.00016677	8.65376e-05	0.00230437	2.75444e-05	0.000166573	0	0.000169868	0	7.49738e-05	0.00028709	0.000715712	0	0	0.000330226	7.16872e-05	7.71673e-05	0.000336556	0.000125154	0.000262279	0.000229986	0.00018668	0.000177314	0.000795024	0	0	0
Oceanicola	0.000258006	0.00053775	0.000219968	0.000483269	0.000130401	0.00126028	0.000466494	0.000694761	0.000227719	0.000515649	0.000742666	0.000728608	0.00106776	0.000629113	0.000348457	0.000229247	0.000198192	0.000354269	0.000505306	0.00143369	0.000202837	0.000566777	0.00019526	0.000309716	0.00032692	0.000688502	0.000440711	0.000291503	0.00211454	0.000315469	0.000748802	0.000374869	0.000169644	0.000150676	0.000406578	0.000408664	0.000177814	0.000770637	0.00045198	0.00091788	0.000229449	0.000655698	0.000344978	0.000473879	0.000899235	0.000233831	0.00126812	0.00121641	0.00096163
Paracoccus	0.00080627	0.0004302	0.000384943	0.00058578	8.15009e-05	0.000960963	0.000283953	0.000694761	0.000167793	9.37544e-05	0.000185667	0.000560467	0.00131899	3.22622e-05	0.000145191	0	0.000594575	0	0.000821122	0.00188172	0.000189315	0.000463726	0	0.000142946	0.000211536	0.000829013	0.000192811	0	0.00103062	0.000121334	4.99201e-05	0.0014245	2.60991e-05	0.000282518	0.00124985	0.000136221	0.000228618	0.000645184	0.000363789	0.00030596	0.000292026	0.000322805	4.59971e-05	0.00022976	0.00189979	0	0.00219979	0.000975955	0.000636572
Salmonella	0.000145129	3.07286e-05	0	0.000366113	9.78011e-05	0	4.05647e-05	0.000238824	0	0	0.000309444	2.80234e-05	0	0.000596851	0.000101633	0	0	0	0.000105272	0	4.05674e-05	0.000180338	0	0.000381188	0.000182691	5.62042e-05	8.26332e-05	6.24649e-05	7.1077e-05	4.85337e-05	0.000199681	0.000206178	5.21982e-05	0	0.000165643	0.000158925	0.000101608	0.000286749	0.000110239	0	0	5.04383e-05	0.000137991	5.74399e-05	0.000354628	0	6.46998e-05	0	0.000595939
Caulobacteraceae_Group	0.000129003	0.000122914	0.000164976	2.9289e-05	0	0	0.000121694	0.000217113	0	0	0	0.000154129	3.14046e-05	4.83933e-05	0	0	9.90958e-05	0	0.000105272	0.000716846	0.000216359	0.000231863	7.32225e-05	0	0	2.81021e-05	0	8.32865e-05	0.000337616	3.64003e-05	4.99201e-05	0.000693507	6.52477e-05	0	0.000617395	0.000181628	7.6206e-05	0.000394279	0.000308669	0	0	0	0	0	0.000291301	0	0.00414079	0.0033239	0.000839733
Hoeflea	0.000451511	6.14571e-05	0.000714895	5.8578e-05	0	0	0.000507058	0.000412514	0	0	6.18888e-05	0.000126105	6.28091e-05	0.000500065	7.25953e-05	0	0.000247739	0.00015183	0.000210544	0.00136201	0.000351584	5.15251e-05	4.8815e-05	0.000262067	0.000124999	0.000140511	9.64055e-05	4.16432e-05	0.000319846	0.000339736	0.000449281	0.00106838	2.60991e-05	0.000150676	0.000662571	0.00149843	0.00012701	0.000681028	0.00100317	0	4.17179e-05	0	0.000183988	2.872e-05	0.000354628	0	0.000828157	0.00120226	0.000948086
Erwinia	0.00122553	0	0	0	0	0	0	0	4.79409e-05	4.68772e-05	6.18888e-05	4.20351e-05	0	3.22622e-05	0	0	0.00138734	0	0.000126326	0	0	0.000128813	0	0.00016677	0	0	2.75444e-05	0	0	0	0	0	0	0.00037669	0	0	5.0804e-05	0	0.000121263	0	4.17179e-05	0	0	4.30799e-05	5.06611e-05	0	0	0	0
Microlunatus	0.000387009	0.000583843	0.000714895	5.8578e-05	0	0.000141781	0.000486776	0.000130268	2.39705e-05	0	6.18888e-05	0.000112093	0.000172725	3.22622e-05	4.35572e-05	0.000127359	0.000322061	0.000126525	0.000505306	0.000878136	0.000135225	0.00010305	0.000170853	0.000238243	0.000153845	0.000758757	0.000661066	0.00012493	0.000355385	4.85337e-05	0.00014976	0.00131204	2.60991e-05	5.65036e-05	0.00076798	0	0.000101608	0.000430123	0.000573243	0	8.34359e-05	0	0	2.872e-05	0	0	0	0	0
Capnocytophaga	0.00041926	7.68214e-05	0.000219968	0.000102512	9.78011e-05	0.000236302	6.0847e-05	0.000130268	0.000167793	0	0	0.000196164	0.000423962	0.000177442	0.000711434	0	0.000545027	0.000177134	0.00033687	0	6.76123e-05	0.000257626	4.8815e-05	0.000142946	0.00098076	0.000112408	0.00209338	8.32865e-05	0.000817385	0.000230535	0	0.000187434	0	0.000188345	0.000120467	0.000272442	0.000431834	8.96089e-05	0.00019843	0.00130033	6.25769e-05	0.000393419	0.000505968	0.000344639	2.53306e-05	0.000280597	2.58799e-05	0	0.000243793
Mesoflavibacter	0.000306382	0.000245829	5.49919e-05	7.32225e-05	0.000326004	0.000204795	0.000283953	0	0.000347572	9.37544e-05	0	0.000266222	0.00089503	0	0.000551724	0	0	0.00010122	0.00195806	0	0	5.15251e-05	0	4.76485e-05	0.000538456	0.000463685	0.000275444	0.000166573	0.000977309	0	0	9.37172e-05	0.000260991	0	0.00019576	4.54071e-05	5.0804e-05	0	4.40956e-05	0.00116265	0.000146013	0.000534646	0.000873945	0.000473879	5.06611e-05	0.000233831	2.58799e-05	5.65771e-05	0.000419866
Enterobacter	0.000258006	0.000261193	0.000192472	0.000907959	0.000244503	7.87674e-05	4.05647e-05	0.000586205	4.79409e-05	0	0.000123778	0.000112093	6.28091e-05	0.000596851	7.25953e-05	5.09437e-05	0.000891862	0	0.000357925	0.000573477	0.00010818	0.000128813	4.8815e-05	0	0.000124999	0.000435583	0.000151494	4.16432e-05	0.000390923	0.000157734	0.00014976	0.000131204	6.52477e-05	0	0.000557162	0.000227035	0.000406432	0.00050181	0.000330717	0.000627218	0.00112638	0.00113991	0.00016099	0.00011488	0.00102589	0	0.00166925	0.000678925	0.00124606
Chaetosphaeridium	0	0	0	0.0010544	0.000635707	0.000756167	0.000425929	0.000108556	0.000515365	0.00104692	0.00102117	0.000658549	0.000329748	0	0	7.64156e-05	0	5.06098e-05	4.21088e-05	3.58423e-05	0	0.000128813	0	0	0	0	0	6.24649e-05	0	0	0	0	3.91486e-05	0	3.01169e-05	0	0	5.37654e-05	2.20478e-05	3.0596e-05	0	0	0	0	0.000202645	0	5.17598e-05	0	0
Oceanospirillum	4.83762e-05	0	0	2.9289e-05	0	0	0	0	0	0	0.000185667	0	0	4.83933e-05	0	0	0	0	0	0	0	0	0	0	0	0	0	0	0	0	0	0	0	0	4.51753e-05	0	0	0	0	7.649e-05	0	0	0	0	2.53306e-05	0	0	0	0
Rudanella	6.45016e-05	0	0	0	0	0	0	0	0	0	0	0	0	0	0	0	0	0	0	3.58423e-05	0	0	0	0	0	0	0	0	0	0	0	0	0	0	0	0	0	0.000107531	0	0	0	0	0	0	0	9.35322e-05	0	0	0.000392778
Xenorhabdus	0	0	0	0.000102512	0.000179302	0	0	4.34226e-05	2.39705e-05	0	0.000123778	0	0	0.000387147	0.000493648	5.09437e-05	0	5.06098e-05	6.31632e-05	0	4.05674e-05	5.15251e-05	0	0	0.000701916	0	0.000509572	8.32865e-05	0.000124385	6.06671e-05	0	0	3.91486e-05	5.65036e-05	3.01169e-05	0.000227035	0	8.96089e-05	6.61434e-05	3.0596e-05	0.000166872	0.00017149	0.000137991	4.30799e-05	0.000151983	9.35322e-05	0	0	0.000176073
Gilvimarinus	0	0	0	0	3.26004e-05	0	0	0	0	0	0	0	0	0	4.35572e-05	0	0	0	0	0	0	0	0	0	1.92306e-05	0	0	0	3.55385e-05	0	0	0	0	0	0	0	0	0	0	0.000137682	0	0	9.19942e-05	2.872e-05	2.53306e-05	0	0	0	0
CL500_29	8.0627e-05	6.14571e-05	5.49919e-05	0	0	0.000267809	0.000466494	6.51339e-05	2.39705e-05	7.81287e-05	0	0.00130309	0.000518175	0	0	0	0	0	8.42176e-05	0.000681004	0.000148747	0	4.8815e-05	0	0	0.000224817	2.75444e-05	0	3.55385e-05	8.49339e-05	0	0.000281152	0	0	0.000210818	0	5.0804e-05	0.000161296	0.000143311	0	0	0	0	0	3.79958e-05	0	2.58799e-05	0.000127298	0
Paludibacter	0.000596639	0	0.00013748	0	0	0	4.05647e-05	0.000151979	0	0	0	0.000420351	0.000408259	0.000564589	0.000174229	0	0	0	0.000210544	0	0	0.00010305	0	0.000119121	1.92306e-05	0	0	8.32865e-05	0.000977309	0.000145601	9.98403e-05	0.000393612	0	0	0	0.000340553	7.6206e-05	0	0.000110239	0	0	0	4.59971e-05	0.00018668	0	0.00121592	0	0	0
ANME_3	0	0	5.49919e-05	0	0	0	0	0	4.79409e-05	0	0	2.80234e-05	0	0	4.35572e-05	0	0	0	0	0	0	5.15251e-05	0	0.000214418	0	0	0	0	0	0	0	0.00121832	0	0	0.00105409	4.54071e-05	0	0	8.81912e-05	0	0	0	0	0	0	0	0	0	0
Donghicola	0.000193505	0.000138279	0.000302455	2.9289e-05	3.26004e-05	0.000173288	0.000202823	0.000477648	0.000167793	7.81287e-05	0.000154722	0.000182152	0.000172725	9.67867e-05	0.000232305	0	0.000173418	5.06098e-05	8.42176e-05	0.00218638	0.000283972	5.15251e-05	0	4.76485e-05	0.000211536	0.000252919	0.000413166	8.32865e-05	0.000604154	0.000279069	4.99201e-05	0.000487329	5.21982e-05	3.7669e-05	0.000240935	0.000113518	0.00025402	0.00143374	0.000529147	0.000336556	0.000187731	0.000201753	0.000206987	5.74399e-05	0.000354628	0.000327363	0.000905797	0.00131542	0.000555307
Aestuariihabitans	0	4.60929e-05	0	0.00016109	4.89006e-05	6.3014e-05	8.11293e-05	4.34226e-05	0.000107867	0.000250012	0	0.000126105	0.000141321	0	7.25953e-05	0	0	0	4.21088e-05	0.000250896	4.05674e-05	0	0	0	2.88459e-05	9.83574e-05	4.13166e-05	0	3.55385e-05	4.85337e-05	0	9.37172e-05	0	0	0	0	0	0.000143374	9.92151e-05	0.00015298	4.17179e-05	7.06136e-05	0.000114993	4.30799e-05	0.000126653	0	0.000232919	7.07214e-05	9.48086e-05
Ruegeria	0.000129003	0.000553114	5.49919e-05	0.00102512	0.000114101	0.00107124	0.00060847	0.00067305	0.000215734	0.00160945	0.00114494	0.000518432	0.000675198	0.000677507	0.000406534	0.000101887	7.43218e-05	0.000328964	0.000126326	0.00163082	0.00016227	0.000128813	0	0.000119121	0.000317305	0.00092737	0.000550888	0.000208216	0.00186577	0.000339736	0.00017472	0.000468586	6.52477e-05	0.000244849	0.000466811	0.000158925	0.000228618	0.000914011	0.000286621	0.00068841	6.25769e-05	0.00077675	0.000298981	0.00018668	0.00108921	0.000374129	0.00147516	0.00148515	0.00119188
Pseudanabaenaceae_Group	0	0.000199736	5.49919e-05	0.000248957	0.000293403	0.000157535	8.11293e-05	0	0.000167793	0.000406269	0.000309444	8.40701e-05	9.42137e-05	6.45245e-05	0	0	0	5.06098e-05	8.42176e-05	5.37634e-05	2.70449e-05	0.000128813	0	4.76485e-05	6.7307e-05	0.000407481	0	0	0	0	0	0	0	0	3.01169e-05	6.81106e-05	5.0804e-05	0	0	0	0	0	0	2.872e-05	0	0	0	0	0
Limnothrix	0	7.68214e-05	0	0	0	0	0	0	0	0	0	0	0	0	0	0	0	0	0	0	0	0	0	0	0.000124999	4.21532e-05	0	0	0	0	0	0	0	0	0	0	0	0	0	0	0	0	0	0	0	0	0	0	0
Simkania	3.22508e-05	0	0.000109984	0	8.15009e-05	0	4.05647e-05	0	0	0	0	2.80234e-05	0.000109916	0.000161311	0	5.09437e-05	4.95479e-05	0	0.000294762	0	5.40899e-05	0.000128813	9.763e-05	0	0	2.81021e-05	0	0.000478897	0.000693001	2.42668e-05	0.000399361	3.74869e-05	0.000274041	0	3.01169e-05	0.000658403	0	3.58436e-05	3.30717e-05	0	0	0	0.000413974	0	0	9.35322e-05	0	0	0
Tamlana	0.00020963	0.000153643	0	7.32225e-05	0	0.000425344	4.05647e-05	8.68451e-05	0	0.000140632	0	0.000308257	0.000408259	0	0.000261343	0	0.00012387	7.59148e-05	8.42176e-05	0	2.70449e-05	5.15251e-05	0	4.76485e-05	0.000442303	0.000238868	0.001088	0	0.000284308	0	0	0	5.21982e-05	0	3.01169e-05	0	0.00012701	3.58436e-05	8.81912e-05	0	4.17179e-05	0.00013114	0.000137991	0	2.53306e-05	0	0	7.07214e-05	0.000148985
Anaerolineaceae_Group	0.000241881	3.07286e-05	0.000192472	2.9289e-05	9.78011e-05	0.000126028	0	0	0	6.25029e-05	0	0	0	6.45245e-05	0	0.000534909	0.000396383	7.59148e-05	0.000126326	0.000197133	0.000594989	0.000437964	0.000536965	0.00145328	0	2.81021e-05	0	0.000957795	0	0.000776539	0.0013728	0.000674764	0	0.00037669	0.000105409	0.000635699	0.000431834	0.000519732	0.00025355	0	0.00114724	0	0	0	6.33264e-05	0	6.46998e-05	0	0
Hydrogenophaga	9.67523e-05	0.0004302	0.000467431	0.00259208	0	0	0.000446211	0.00419028	0	3.12515e-05	0	0.000126105	9.42137e-05	0.000371016	0	0	0.000148644	5.06098e-05	0.000547415	0.00426523	0.000216359	0.00180338	0.00048815	0.000571783	3.84612e-05	0.000786859	9.64055e-05	0	0.000533077	0.000630938	0.00282049	0.0014245	0	0	0.00295145	0.00290605	5.0804e-05	0.00335137	0.00065041	0	0.00252394	4.03506e-05	0.000183988	0	0.000848574	0	0.00236801	0.000749646	0.00222123
Phaeospirillum	0	6.14571e-05	0	0	0	0	0	0	0	0	0.000866444	0	0	0	0	0	0	0	0	0	0	0	0	0	0	2.81021e-05	0	0	3.55385e-05	0	0	0	0	0	0.00028611	0	0	0	0	0	0.000125154	0	0	0	5.06611e-05	0	0	0	0
Chiayiivirga	0.000516013	4.60929e-05	0.000934862	0	0	0	0.000121694	0.00049936	3.59557e-05	0	0	0.000602502	0.00200989	0	0.000188748	0	0.000346835	0.000126525	0.000378979	0.00100358	0.000459764	0.000231863	0	0.000262067	1.92306e-05	0.000210766	0.00101914	0	0.000195462	0.000448937	0	0.000824711	0	0.00020718	0.000948681	0	0.000279422	0.000483888	0.000352765	0	0	0	0	0	2.53306e-05	0	6.46998e-05	0.00029703	6.77204e-05
Gemmatimonadaceae_Group	0.000193505	3.07286e-05	0.000522423	0	0.000130401	0	4.05647e-05	0.000260535	9.58819e-05	0	0.000123778	0.000308257	0.000188427	4.83933e-05	0	0	4.95479e-05	0.000126525	0.000231598	0.000878136	2.70449e-05	0	0	0	0	0.000140511	0	0.0007704	0.000248769	0.000655205	0.000224641	0.000262408	0.000182694	0	0.000406578	0.000158925	0.000203216	0.000663106	0.000595291	0	0	0	0	0	0	0	5.17598e-05	0	0
Paulinella	0	0.000169007	0	0	0	0	0	0	0	0	0	0	3.14046e-05	0	0	0	0	0	4.21088e-05	0	0	0	0	0	0.000201921	0.000365328	0	0	0	0	0	0	0	0	0	0	0	0	0	0	0	0	0	0	0	0	0	0	0
Pelagicola	0	0.000153643	0	0.000410046	3.26004e-05	0.000283563	0.000162259	4.34226e-05	5.99262e-05	0.000343766	0.000154722	0.000140117	9.42137e-05	6.45245e-05	0	0	0	0.00015183	0	0.000125448	0	0	0	0	1.92306e-05	0.000154562	0	0	0	0	0	0	5.21982e-05	7.53381e-05	0	0	0	0	0	0.000275364	0	0.000211841	0.000114993	0.00012924	0.000291301	0.000187064	3.88199e-05	2.82885e-05	8.12645e-05
Erythromicrobium	3.22508e-05	3.07286e-05	0	0.000117156	0	0	0.000121694	0	0	0	0	2.80234e-05	9.42137e-05	0	0	0	0	0	0	0.000232975	5.40899e-05	0	0	4.76485e-05	0	7.02553e-05	0	0	0.000159923	6.06671e-05	0	0.000149948	0	0	0.000120467	0	5.0804e-05	0.000107531	0.000121263	0	0.000187731	0	4.59971e-05	2.872e-05	0.000113988	0	0.00134576	0.000763791	0.000582395
Herminiimonas	0	0	0	0	0	9.45209e-05	6.0847e-05	0.000998719	0	0	0	0	6.28091e-05	0	0	0	0	0	0	0.00143369	0	0	0	7.14728e-05	0	0	0	0	0	0	4.99201e-05	0	0	0	0	0	0	0.000967777	2.20478e-05	0	0.000354603	0	4.59971e-05	0	0	0	0	0	5.41763e-05
Hwangdonia	0.000225755	0	0	0	0	0	6.0847e-05	8.68451e-05	0	0	0	8.40701e-05	0.000141321	0	0.000333938	0	0.000173418	7.59148e-05	8.42176e-05	0	4.05674e-05	7.72877e-05	0	0	0.000423073	0	0.000908966	0	7.1077e-05	8.49339e-05	0	3.74869e-05	0	0.000113007	0	0	0.000152412	3.58436e-05	4.40956e-05	0	0	0	0	0	3.79958e-05	0	0	2.82885e-05	4.06322e-05
Roseburia	4.83762e-05	0	0	0	0	0	0	0	0	0	0	0	7.85114e-05	0	0	0	0	0	4.21088e-05	0	0	0	0	0	0	0	0	0	0	0	0	3.74869e-05	0	0	0.000255993	0	0	0	0	0	0	0	0	0	0.00198845	0	0.00285973	0.00274399	2.70882e-05
Reyranella	3.22508e-05	0	0.000109984	8.7867e-05	0	0	8.11293e-05	0	0	0	0	0	0	0	0	0	9.90958e-05	0	0	0.000501792	0.00016227	0	0	0.000262067	0	0.000140511	0	0	0	0.000121334	0	0.00114335	0	0	0.000511987	0	5.0804e-05	0.000412201	0.000154335	0	0.000146013	0	9.19942e-05	0	0.000202645	0	0.00010352	0.000240453	0.000528219
Stenotrophomonas	0.000661141	0.000384107	0.000989854	0.000248957	0	0	0.000202823	0.000586205	0	0	6.18888e-05	0.000728608	0.00180576	6.45245e-05	0.000522686	0	0.000148644	0.00010122	0.00136854	0.0016129	0.000148747	0.000412201	0	0.000309716	0.000307689	0.00039343	0.00147363	0	0.000444231	0.00046107	0	0.00103089	0	0.000188345	0.00132514	9.08141e-05	0	0.000645184	0.000341741	0.00030596	0.000438038	0.000413594	4.59971e-05	2.872e-05	0.000227975	0	0.000478778	0.000339463	0.000338602
Lewinella	9.67523e-05	3.07286e-05	0.000109984	0.000102512	0	0.000393837	0.000243388	0.00449424	0.000227719	0	0	0.000182152	0	8.06556e-05	2.90381e-05	0	0.000322061	0	0.000357925	0.0037276	0.000135225	0.000283388	4.8815e-05	4.76485e-05	1.92306e-05	5.62042e-05	0	0	0	0.000412536	0.000199681	0.000187434	7.82973e-05	0	0.000150584	0.000567588	0	0.00195348	0.000209454	0	4.17179e-05	0.00030263	0	8.61599e-05	0.000265971	0	3.88199e-05	0	0.000772013
Microbacteriaceae_Group	0	7.68214e-05	0.000109984	0	0	6.3014e-05	0.00026367	0	0	3.12515e-05	0	0.000896748	0.000376855	0	0	0	0	0	6.31632e-05	0.000430108	0	0	0	0	0	8.43064e-05	0	0	3.55385e-05	9.70674e-05	0	3.74869e-05	7.82973e-05	0	0.000150584	6.81106e-05	0	0.00030467	7.71673e-05	0	0	0	0	0	0	0	5.17598e-05	0.000155587	8.12645e-05
Phaeodactylibacter	0.00185442	3.07286e-05	0.0013473	0.000117156	0	0.000110274	0.000689599	0.000303958	2.39705e-05	3.12515e-05	0	0.00133111	0.000580985	3.22622e-05	0.000392015	0	0.000792766	0.000480794	0.00111588	0.000340502	0.00109532	0.00105627	0	0.000762377	1.92306e-05	0.000112408	6.8861e-05	0.000208216	0.000728539	0.00104347	0.000224641	0.00148073	0.000117446	0.000395525	0.00057222	0.000204332	0.00104148	0.000645184	0.00307567	0	0	0	6.89957e-05	2.872e-05	0	9.35322e-05	0	0	0
Neiella	0	0	0	0	0	0	0	0	0	0	9.28333e-05	0	0	0	0	0	0	0.000759148	0	0	0	0	0	0	0	0	0	0	0	0	0	0	0	0	3.01169e-05	0	0.000457236	0	0	6.1192e-05	0	0.00030263	0.00144891	0.000789799	0.000101322	0	0	0	0
Flaviramulus	0	0.00010755	0.000109984	0	8.15009e-05	0.000472605	0.000202823	0	0	0	0	0.000112093	0.00034545	0	0.000101633	0	0	5.06098e-05	0.000126326	0.000107527	4.05674e-05	0	0	0	7.69223e-05	0.000252919	0.00012395	4.16432e-05	0.000177692	2.42668e-05	0	9.37172e-05	3.91486e-05	3.7669e-05	0	0	0.00012701	0.000215061	7.71673e-05	7.649e-05	0.00020859	0.000211841	0.000390975	5.74399e-05	6.33264e-05	9.35322e-05	0	8.48656e-05	5.41763e-05
wb1_P06_Group	0.00162866	0.00032265	0.00208969	0	0	0.000393837	0.000202823	0.000260535	8.38966e-05	0	0	0.000714596	0.000612389	0	0	0.000101887	0.00126347	0.000607318	0.0016633	0.00224014	0.000459764	0.000695589	0.000146445	0.00131033	1.92306e-05	0.000323174	8.26332e-05	0	0.000621924	0.00106774	0.0001248	0.00144324	0.000104396	0.000621539	0.00215336	0	0.00157492	0.00154127	0.00113546	0	8.34359e-05	0	0	0	0	0	0.000258799	0.000113154	0
OM75	0.000258006	0.00136742	0.000302455	0.000512558	0.000293403	0.000488358	0.000527341	0.00123754	0.000455439	0.000703158	0.00120683	0.00016814	0.000266939	0.0031133	0.0027441	0.00101887	0.000990958	0.00303659	0.000547415	0.00016129	0.000865438	0.000824402	0.000756633	0.000929147	0.00145191	0.00115219	0.000426938	0.000874508	0.000444231	0.000388269	0.00122304	0.000112461	0.000339288	0.00387991	0.000225876	0.00031785	0.00299743	0.000268827	0.000176382	0.000351854	0	0.000201753	0.00032198	0.00015796	0.000253306	0.00378806	3.88199e-05	0	0.000203161
Pleurocapsa	0	0	0	0	0	0	0	0	0	0	0	0	0.00133469	0	0	0	0	0	0	0	0	0	0	0	0	2.81021e-05	0	0	0	0	0	0	0	0	0	0	0	0	0	0	0	0	0	0	0	0	0	0	0
Nitrospinaceae_Group	0.000177379	0	0.000769886	0	0	0	0	0	0	0	0	2.80234e-05	0.000141321	0	2.90381e-05	0.000229247	0.000148644	0.000126525	0.000168435	0	0.00016227	0.000283388	0.000341705	0.000643255	0	0	0	0.000229038	0	0.000521737	0.000624002	0.000187434	0.000156595	0.000131842	0	0	0.000431834	0.000573497	0.0012898	0	0.000333744	0	4.59971e-05	0	2.53306e-05	0	0	0	0
Gillisia	0.000225755	7.68214e-05	0.000357447	4.39335e-05	6.52007e-05	0.00165412	8.11293e-05	0.000325669	4.79409e-05	0	0	0.000266222	0.000298343	0	0.000290381	0	7.43218e-05	0.000379574	0.000147381	0.000197133	4.05674e-05	0	0	0	0.000317305	0.000182664	0.00114309	0	0.00136823	7.28005e-05	0	3.74869e-05	2.60991e-05	0	0	0.000136221	0.00025402	0.000322592	7.71673e-05	0.000183576	0.00039632	0.000363156	0.000252984	0.00011488	6.33264e-05	0.000327363	0	0	9.48086e-05
Rubrivivax	3.22508e-05	0	0.000164976	0.000131801	0	0	0	4.34226e-05	0	3.12515e-05	0	0.000126105	0	0.00283908	0	0	4.95479e-05	5.06098e-05	0.000210544	0.000125448	9.46573e-05	0.000257626	0.000536965	0.00016677	0	8.43064e-05	0	0	3.55385e-05	0.000109201	0.00152256	0.000168691	6.52477e-05	0	0.000993856	0.0025882	0	0.000322592	0.000176382	0	6.25769e-05	0	0	0	0	0	9.05797e-05	0	0
Roseomonas	3.22508e-05	0.00032265	5.49919e-05	0	0	0	8.11293e-05	0	0	0	6.18888e-05	0	0	0	0	0	7.43218e-05	0	0.000105272	0.000304659	2.70449e-05	0	0	0	0	0.000337225	0	0	0	7.28005e-05	4.99201e-05	0.000468586	2.60991e-05	0	0.000436694	4.54071e-05	0	0.000268827	5.51195e-05	3.0596e-05	6.25769e-05	0	0.00048297	2.872e-05	0	9.35322e-05	0.00010352	0.000282885	0.000189617
Listonella	0	7.68214e-05	0	0	0	0	0	0	0	6.25029e-05	0	0	4.71069e-05	0	0.000377495	0	0	0	0	0	0	0.000154575	0	0	8.65376e-05	4.21532e-05	0.000261672	0	0	2.42668e-05	0	0	0	0	0	0	0	0	0	0	4.17179e-05	2.01753e-05	0	0	0.000392624	0	0	0	0
Aeromonas	3.22508e-05	0.00010755	0	0.000615069	0.00190712	3.1507e-05	0.00026367	0.000390803	0.00160602	0.000187509	0	5.60467e-05	3.14046e-05	0.00127436	2.90381e-05	0	0	0.000582013	0.000105272	8.96057e-05	2.70449e-05	0.000128813	0	0.000190594	0	0.000309123	0	0.000229038	0.000106615	4.85337e-05	0.000274561	0.000374869	0.000730775	0	0.000346344	0.000499478	0.000101608	0.000125453	0	0.00022947	0.000187731	0.000877627	0.00016099	0.000516959	0.00350828	0	0.00138458	0.000240453	0.00119188
Psychromonadaceae_Group	0	0	0	4.39335e-05	8.15009e-05	3.1507e-05	6.0847e-05	0	0.000107867	3.12515e-05	0	0	0	0	0	0	0	0	0	0	0	0	0	0	0	0	0	0.000104108	0	0	0	0	3.91486e-05	0	0	0	0	0	0	6.1192e-05	8.34359e-05	2.01753e-05	0	0.00015796	3.79958e-05	0.000561193	0	0	0
Jannaschia	3.22508e-05	0	0	0	0	0	0	0	3.59557e-05	0	0	8.40701e-05	0.000266939	0	7.25953e-05	0	0	0	0.000126326	0.00016129	0	0	0	0	0.000144229	0	0.000165266	0	0.00122608	0	0	5.62303e-05	0	0	4.51753e-05	0	0	3.58436e-05	6.61434e-05	0	0	2.01753e-05	0	0	6.33264e-05	0	0.000271739	0.000226308	5.41763e-05
Halothiobacillus	8.0627e-05	0	8.24878e-05	0.00016109	0	0	0	0.000130268	2.39705e-05	9.37544e-05	0	4.20351e-05	0	0	0	0	4.95479e-05	0	6.31632e-05	3.58423e-05	4.05674e-05	0.000231863	0	9.52971e-05	1.92306e-05	0	0	6.24649e-05	0	2.42668e-05	7.48802e-05	3.74869e-05	0	0	0	4.54071e-05	7.6206e-05	7.16872e-05	0.000110239	7.649e-05	8.34359e-05	0.000151315	0	0.00010052	0.000101322	9.35322e-05	0.000401139	9.90099e-05	2.70882e-05
Reclinomonas	8.0627e-05	0	0.000384943	0.000219668	0.000277103	0.00031507	0.000182541	0.000195402	0.000155808	0.000171883	0.00182572	0.000756631	0.000643794	0	4.35572e-05	0.000280191	4.95479e-05	0.00010122	0.000126326	8.96057e-05	0.000121702	0.000386439	9.763e-05	0	0	0	2.75444e-05	0.000229038	8.88462e-05	0.000376136	0.000199681	5.62303e-05	9.13468e-05	5.65036e-05	0	0.000204332	5.0804e-05	5.37654e-05	0.000231502	0.000122384	0.000187731	2.01753e-05	0.000229986	0	0.000443285	0.000420895	7.76398e-05	0.000183876	8.12645e-05
Rubribacterium	0	0.000245829	0	0.000146445	0.000114101	0.000110274	0.000121694	0.000282247	0.000155808	9.37544e-05	0	0	3.14046e-05	0.000129049	5.80762e-05	0.000101887	0	0.000126525	0	8.96057e-05	0	0	0	4.76485e-05	3.84612e-05	0.000238868	0	8.32865e-05	0	0	0	0	2.60991e-05	3.7669e-05	0	0	0	0	0	0.000428344	0	0.000595172	0.000344978	0.0002154	0.000341963	0	0	0	0.000189617
Nephroselmis	0	0	0	0.000512558	0.000554206	0.000582879	0.000709882	0.000108556	0.000707129	0.000906292	0.000804555	0.000392327	9.42137e-05	0	0	0.000152831	0	0	0	0	4.05674e-05	7.72877e-05	0	7.14728e-05	0	0	0	6.24649e-05	0	0	0	3.74869e-05	2.60991e-05	0	0	0	0	0	7.71673e-05	0.000107086	0.000438038	2.01753e-05	0	0	0.00043062	0.000187064	5.17598e-05	0	0
Delftia	0	0	0	0.000380757	0	0	0	6.51339e-05	0	0	0	0	3.14046e-05	0.000758162	0	0	0	0	0	0.000125448	2.70449e-05	5.15251e-05	0.000244075	0	0	2.81021e-05	0	4.16432e-05	3.55385e-05	2.42668e-05	0.000474241	0.000149948	3.91486e-05	0	0.000255993	0.00136221	0	0.000107531	0	0	4.17179e-05	0	0.000114993	0	0.000506611	0.000187064	0.000517598	0.000212164	0.000230249
Aquabacterium	0	6.14571e-05	0	0.000497913	0	0	4.05647e-05	0.000195402	0	0	0.000123778	0	0	0.000758162	0	0	0	0	0	3.58423e-05	0	5.15251e-05	0.000146445	4.76485e-05	0	8.43064e-05	4.13166e-05	0	0	4.85337e-05	0.000624002	3.74869e-05	0	0	0.000542103	0.00154384	0	5.37654e-05	0	0	0.00146013	4.03506e-05	0.000896943	5.74399e-05	0.000291301	0.000140298	0.000375259	4.24328e-05	0.000352146
Persicivirga	0	0	0	0.000102512	0	3.1507e-05	0.00026367	0.00128097	0	4.68772e-05	0	0	0.000141321	0	0	0	7.43218e-05	0	0	0.000179211	0.000135225	5.15251e-05	4.8815e-05	4.76485e-05	0.000124999	0	5.50888e-05	8.32865e-05	8.88462e-05	2.42668e-05	0.00014976	3.74869e-05	6.52477e-05	0	3.01169e-05	0.000227035	0	0.000322592	9.92151e-05	0	0	0	0	0	2.53306e-05	0	0	0	0
Agrobacterium	0.00370884	0.000291921	0.0013748	0.000234312	0.000163002	0	0.000831576	0.00130268	9.58819e-05	0.00021876	6.18888e-05	0.00127506	0.0020413	0.000129049	0.000392015	0.000254719	0.00183327	0.00015183	0.00288445	0.00270609	0.000432719	0.000875927	7.32225e-05	0.000571783	0.000480765	0.000744706	0.000578433	0.000104108	0.00191908	0.000546004	4.99201e-05	0.00391738	0.000221842	0.000113007	0.00197265	0.000363257	0.00050804	0.00193555	0.00155437	7.649e-05	0.000187731	6.0526e-05	0.000137991	4.30799e-05	0.000227975	0	0.00241977	0.00214993	0.0011377
Haererehalobacter	0	0	0	0	0	0	8.11293e-05	0	0	0	0	0	0	0	0	0	7.43218e-05	0	0.000168435	0.000107527	0	0.00010305	0	0	0	5.62042e-05	0	0	8.88462e-05	0.000109201	0	0	0	0	9.03506e-05	0.000249739	0	0	2.20478e-05	3.0596e-05	0	0	0.000137991	8.61599e-05	0	9.35322e-05	0	0	0
Lishizhenia	0.000370884	0.000138279	5.49919e-05	0	0	0	6.0847e-05	0.000108556	0	3.12515e-05	0	0.00025221	0.00020413	0.000241967	0.000116152	0	7.43218e-05	0	6.31632e-05	0	4.05674e-05	0	0	7.14728e-05	2.88459e-05	4.21532e-05	2.75444e-05	0	0.000373154	9.70674e-05	4.99201e-05	7.49738e-05	0	3.7669e-05	4.51753e-05	0.000272442	5.0804e-05	0	6.61434e-05	0	0	0	4.59971e-05	5.74399e-05	0	0.000327363	0	0	0
Amaricoccus	0	0	0	0	0	4.72605e-05	0	0	0	0	0	0	0	3.22622e-05	0	0	0	0	0	5.37634e-05	0	0	0	0	0	0	0	0	0	0	0	3.74869e-05	0	0	0	0	0	0	0	0.00015298	0.00020859	0.000100877	0	0	0.000113988	0	2.58799e-05	0	0
Oceanobacterium	0	3.07286e-05	0	0	0	0	0	0	0	6.25029e-05	0	2.80234e-05	0	0	5.80762e-05	0	0	0	0.000231598	5.37634e-05	0	0	0	0	0	0.000112408	0	0	0.00103062	0	0	5.62303e-05	0	0	0.000120467	0	5.0804e-05	0	0	3.0596e-05	0	4.03506e-05	0	0	0.000101322	0	5.17598e-05	0	4.06322e-05
Azohydromonas	0	0	0	0	0	0	0	0	0	0	0	0	0	0.000935605	0	0	0	0	0	0	0	0	0.000170853	0	0	0	0	0	0	0	0.000524161	3.74869e-05	6.52477e-05	0	7.52921e-05	0.00077192	0	0	0	0	4.17179e-05	0	0	0	0	0	0	0	0
Sneathiellaceae_Group	0.000241881	0	0.000604911	0	0	0	0	0	0	0	0	0	0	0	0	0.00137548	0.000247739	0	0	7.16846e-05	0.000865438	0.00100474	0.00173293	0.00159623	0	8.43064e-05	0	0.000812043	3.55385e-05	0.000594538	0.00164736	0.000168691	9.13468e-05	0.000414359	0	0.000227035	0.000177814	0.00030467	0.000485052	0	0.000229449	0	0	0	0	0	0	0	0
PAUC26f_Group	0.000225755	0.000169007	0.000357447	0	0	0	4.05647e-05	0	0	3.12515e-05	0	0.000196164	9.42137e-05	0	0	0.000636797	0.00012387	0	0.000273707	0.000340502	0.000121702	0.0027566	0.00058578	0.000285891	3.84612e-05	7.02553e-05	0	0.000999438	3.55385e-05	0.00123761	0.00129792	0.000487329	0	0	0.000165643	0.000158925	0	0.000412201	0.000716553	0	8.34359e-05	0	0	0	0	0	5.17598e-05	0	0
Psychromonas	0.000129003	0	0	0.000219668	8.15009e-05	0.000425344	4.05647e-05	0	0	3.12515e-05	6.18888e-05	0.00016814	0	0.000225836	0.000101633	0.000483965	0	0	6.31632e-05	0	2.70449e-05	0.000128813	4.8815e-05	0.000119121	1.92306e-05	0	0	0.000541362	3.55385e-05	8.49339e-05	0.00014976	9.37172e-05	0.000378437	3.7669e-05	9.03506e-05	0.000590292	5.0804e-05	8.96089e-05	0.000132287	4.5894e-05	0.00039632	0.000706136	0.000183988	0.00015796	0.000544607	0.000701492	0	0	0.000799101
Jejuia	0.000161254	0	8.24878e-05	0	3.26004e-05	0	0	0	4.79409e-05	0	0	7.00584e-05	0.000251237	0	0.000450091	0	0.000148644	0	4.21088e-05	0	4.05674e-05	0.00010305	0	0	0.000346151	0	0.000785016	0	5.33077e-05	3.64003e-05	0	0	5.21982e-05	0.000113007	0	0	0.000101608	0	2.20478e-05	0	0	0	0	0	0	0	0	0	0
Peredibacter	0.000645016	0	0.00142979	2.9289e-05	3.26004e-05	9.45209e-05	0	0	3.59557e-05	0	0	0.000294245	0	0	0.000174229	0.000382078	0.000173418	0.00015183	0.000105272	3.58423e-05	0.000270449	5.15251e-05	0.000170853	9.52971e-05	0	5.62042e-05	0	0.000187395	0.000195462	0.00049747	9.98403e-05	3.74869e-05	0.000260991	0.000188345	3.01169e-05	0.000227035	0.000660452	0	0.000374813	0.000321258	0.000855218	3.0263e-05	0.000229986	0.0001436	2.53306e-05	0.000187064	2.58799e-05	0	0
Neochlamydia	3.22508e-05	0	0	0	0	0	0	0	0	0	0	4.20351e-05	0.000125618	0	0	0	0	0	0.000105272	5.37634e-05	0	0.000128813	0	0	0	0	0	8.32865e-05	0.000213231	0	0	0.000149948	3.91486e-05	0	0.000180701	0	0	7.16872e-05	0	0	0	0	0	0	2.53306e-05	9.35322e-05	2.58799e-05	0	0
BAL58	8.0627e-05	0.0004302	0.000164976	0.000659003	0.000456405	7.87674e-05	0.000425929	0.00110728	0.00077904	0.00165633	0.000309444	0.00103686	0.00116197	0.00029036	0.0003049	0.000178303	9.90958e-05	0.000860367	0.000168435	0.000232975	0.000229882	0.000386439	0.000268483	0.000142946	0.000134614	0.000576094	0.000137722	0.000249859	0	0.000145601	0.000499201	0	0.000535032	0.000188345	0	0.00122599	0.000330226	0.000555575	0.00019843	0.00102497	0	0.000191666	0.000229986	0.000416439	0.000139318	0.000187064	0	0.00029703	0.000203161
Victivallis	3.22508e-05	0	0.000164976	4.39335e-05	0	4.72605e-05	0	8.68451e-05	0	3.12515e-05	6.18888e-05	5.60467e-05	6.28091e-05	0	0	0.000127359	4.95479e-05	0.00015183	8.42176e-05	0	2.70449e-05	0	0.000122038	9.52971e-05	2.88459e-05	2.81021e-05	0	0	5.33077e-05	0	4.99201e-05	0	2.60991e-05	0	9.03506e-05	0	0.00012701	0	6.61434e-05	0	0	0	0	0	2.53306e-05	0	2.58799e-05	7.07214e-05	0
Hyunsoonleella	0.000193505	6.14571e-05	0	0.00016109	0.000472705	6.3014e-05	0.000101412	6.51339e-05	0.000563306	6.25029e-05	0	0.000126105	0.000423962	0.000225836	0.000406534	0	0.000198192	0.000227744	0.000126326	0	2.70449e-05	0.000180338	0	0	0.000471149	0.000182664	0.000771244	0.000374789	8.88462e-05	7.28005e-05	0	0	0.00028709	9.41726e-05	4.51753e-05	0	5.0804e-05	0	5.51195e-05	0.000504834	0.000229449	0.000221929	0.000275983	0.0002154	5.06611e-05	0.000140298	0	2.82885e-05	0.000189617
Costertonia	3.22508e-05	0	5.49919e-05	2.9289e-05	0	0	0	0	0	0	0	0	0	0	5.80762e-05	0	0	0	0.000126326	0	2.70449e-05	0.00010305	0	0	2.88459e-05	0	8.26332e-05	0	0.000284308	0	0	5.62303e-05	0	0	0	0.000272442	7.6206e-05	0	0	0	0	0	0	0	0	0.000280597	0	0	2.70882e-05
Sinobacteraceae_Group	0.000499887	0.00032265	0.000357447	8.7867e-05	0	0	0.00060847	0.000282247	0	6.25029e-05	0.000340389	0.000658549	0.00130329	4.83933e-05	7.25953e-05	7.64156e-05	0.000371609	0	0.000694795	0.000663082	8.11348e-05	0.000953215	0.000219668	0.000428837	1.92306e-05	0.00039343	0.000165266	6.24649e-05	0.000302077	0.000182001	0.000549121	0.00118084	0	7.53381e-05	0.00198771	0.000930845	0.000101608	0.000537654	0.000341741	0	0	0	9.19942e-05	0.00010052	2.53306e-05	0	6.46998e-05	0	0
Trichodesmium	0	0	0	0	0	0	0	0	0	0	0	0	0.000879328	0	0	0	0	0	0	0	0	0	0	0	0	0	0	0	0	0	0	0	0	0	0	0	0	0	0	0	0	0	0	0	2.53306e-05	0	0	0	0
Nitrospira	0	0	0	0	0	0	0	0	0	0	0	0	0	9.67867e-05	0	0.000101887	0	0	4.21088e-05	0	2.70449e-05	0	0	0.00016677	0	0	0	0	0	0.000109201	9.98403e-05	0	0.000260991	3.7669e-05	9.03506e-05	0.000840031	5.0804e-05	0.000394279	0.000793721	0	0	0	0	0	0	0	0	0	0
Flexispira	0	0	0	0	0	0	0	0	0	0	0	0	0	0	0	0	0	0	0	0	0	0	0	0	0	0	0	0	0	0	0	0	0	0	0	0	0	0	0	0	0	0	0	0	0.00216576	0	0.00213509	0.00179632	0
Polynucleobacter	0.000129003	0.000691393	0.000357447	0.000615069	0.00084761	0.000126028	0.000892423	0.0013461	0.000695144	0.00237511	0.000959277	0.000392327	0.000235534	0.000467802	0.000362976	0.000127359	0.000222965	0.00144238	0.000210544	0.0009319	0.000175792	0.000386439	0.000219668	0.000309716	0.00016346	0.000547991	0.000234128	0.000333146	3.55385e-05	0.000109201	0.000524161	3.74869e-05	0.000756874	0.000320187	3.01169e-05	0.00031785	0.000355628	0.000376358	7.71673e-05	0.000596622	0.000166872	0.000141227	0.000597962	0.000430799	7.59917e-05	0.000420895	2.58799e-05	0.000268741	0.000203161
Oceaniserpentilla	0	0	0	0.000146445	3.26004e-05	0	0	0	0.000119852	0	0	0	0	6.45245e-05	2.90381e-05	0.000127359	0	0	0.000736904	0	0	0	0.000244075	0	0	0	0	4.16432e-05	0.000266539	0	0.000823682	0	0.000117446	3.7669e-05	0	0.000249739	0	0	7.71673e-05	4.5894e-05	0.00114724	2.01753e-05	0	0	7.59917e-05	0	0	0	0
Candidatus_Odyssella	3.22508e-05	0	8.24878e-05	7.32225e-05	0.000163002	0	4.05647e-05	0	5.99262e-05	7.81287e-05	0	0	0	0.000596851	0	0.000662269	0.000247739	0.000202439	0.000147381	0	0.000311017	0	0.000366113	0.000238243	0.000153845	0	0	0.000145751	0	0.000218402	0.000798722	0	0.000260991	0.000847553	0	0.0012714	0.000304824	0.000161296	4.40956e-05	9.1788e-05	0.000166872	0	6.89957e-05	0	0	0.000233831	0	0	4.06322e-05
Janthinobacterium	4.83762e-05	0	0	0.00616534	0	0	0	0.000260535	0	0	0	0	3.14046e-05	0	0	0	0	0	0	0.0037276	0	0	0	0	0	0	0	0	0	0	0	0	0	3.7669e-05	0	9.08141e-05	0	0.00069895	0	0.000780198	0.00746751	0.000151315	0.000114993	0	0	0	0	0	5.41763e-05
Winogradskyella	0.000225755	0.00135206	0.000329951	0.000380757	0.000146702	0.00230001	0.000324517	0.000607916	2.39705e-05	0.00021876	6.18888e-05	0.000434362	0.000628091	0.000241967	0.000595281	0	0	7.59148e-05	0.00290551	0.000591398	0	0.000309151	9.763e-05	4.76485e-05	0.000192306	0.00212171	0.000385622	0.000291503	0.00239885	7.28005e-05	4.99201e-05	0.000131204	0	0	0.000361402	0.00031785	0.000406432	0.000483888	3.30717e-05	0.000413046	0.000417179	0.000373243	0.00124192	0.00022976	0.00021531	0.000514427	0.000245859	0.000169731	0.000419866
Candidatus_Microthrix	0.000999774	9.21857e-05	0.00151228	2.9289e-05	0	0.000472605	0.000304235	8.68451e-05	7.19114e-05	6.25029e-05	0	0.000840701	0.000502473	0	4.35572e-05	0.000101887	0.000743218	0.000480794	0.000736904	0.00132616	0.000189315	0.000515251	0.000219668	0.000190594	0	0.000196715	2.75444e-05	0	0.000835155	0.000728005	4.99201e-05	0.000993402	5.21982e-05	0.000339021	0.000587279	4.54071e-05	0.00063505	0.000949855	0.00174178	0	4.17179e-05	0	0	0	0	9.35322e-05	0	0	0
Sphingosinicella	9.67523e-05	6.14571e-05	0.000164976	0	0	0	0.000162259	0.000303958	0	0	0	5.60467e-05	4.71069e-05	0	0	0	4.95479e-05	0	0.000210544	0.00103943	0.00016227	5.15251e-05	4.8815e-05	0.000214418	0	0.000182664	0	0.000145751	0.000266539	4.85337e-05	0.0001248	0.000449843	5.21982e-05	0	0.00057222	0.000408664	0.00012701	0.000340514	0.000165358	0	0	0	0	0	0	0	2.58799e-05	0	0
Xanthobacter	0	0.000353379	5.49919e-05	0	0	0	0.000141976	0	0	0	0	5.60467e-05	0	0	0	0	4.95479e-05	0	0	0.000501792	0	0	0	0.000142946	0	0.00012646	0	0	0.000106615	6.06671e-05	0	0.000224921	5.21982e-05	0	0.000963739	0.000158925	0	0.000340514	7.71673e-05	0	0	0	0	0	0	0	0.0001294	0.000226308	4.06322e-05
Wenyingzhuangia	6.45016e-05	0.000583843	0	7.32225e-05	0.000537906	0.00184316	0.000932987	0.000738184	0.000635217	0.000140632	6.18888e-05	0.00110692	0.000172725	0	0.00015971	5.09437e-05	0	0.000278354	6.31632e-05	7.16846e-05	0.000202837	0	0	0	0	0.000463685	0.000261672	0.000395611	5.33077e-05	0	0	3.74869e-05	0.000456734	3.7669e-05	0	9.08141e-05	0.000152412	8.96089e-05	0.000121263	0.000260066	6.25769e-05	0.000252192	0.000252984	0.0002872	0.000202645	9.35322e-05	7.76398e-05	0.00019802	0.000216705
JTB248	0.00185442	0	0.000247463	0	8.15009e-05	4.72605e-05	0.000162259	4.34226e-05	0	3.12515e-05	0	0.000140117	7.85114e-05	4.83933e-05	0.000392015	0.00068774	0.000470705	0.000354269	0.00033687	0	0.00102771	0.000206101	0.000707818	0	4.80765e-05	5.62042e-05	2.75444e-05	6.24649e-05	0.00151039	6.06671e-05	0	0	5.21982e-05	0.000979395	0	0	0.000965275	7.16872e-05	0.000231502	6.1192e-05	0.000417179	9.0789e-05	0	0	0.00024064	9.35322e-05	0	8.48656e-05	2.70882e-05
BSLdp215_Group	0	0	0	5.8578e-05	0	0.000110274	0	4.34226e-05	0	0.00010938	0	4.20351e-05	4.71069e-05	0	0	5.09437e-05	4.95479e-05	0.00010122	4.21088e-05	0.000107527	6.76123e-05	0.000257626	4.8815e-05	0	4.80765e-05	2.81021e-05	0	6.24649e-05	0	2.42668e-05	0.000399361	3.74869e-05	0	7.53381e-05	0.000180701	0.00122599	5.0804e-05	7.16872e-05	0.000132287	0	0.000166872	0	4.59971e-05	0	0.000329297	9.35322e-05	0.00014234	2.82885e-05	0
Maritimimonas	0.000161254	0.000414836	0	2.9289e-05	0.000244503	0.00130754	0.000141976	8.68451e-05	7.19114e-05	3.12515e-05	0	0.000210175	9.42137e-05	0	8.71143e-05	0	0	0	0.000231598	0	0	7.72877e-05	0	0	0	0.000238868	9.64055e-05	0.000145751	0.000248769	0	0	0	0.000130495	3.7669e-05	0	4.54071e-05	0	0	5.51195e-05	3.0596e-05	0	2.01753e-05	0.00016099	0.000315919	0.000177314	9.35322e-05	3.88199e-05	0.000113154	4.06322e-05
Pelagimonas	0	9.21857e-05	0	0.000175734	0	0.000141781	4.05647e-05	0.000238824	7.19114e-05	0.000281263	0	0.000140117	7.85114e-05	0	8.71143e-05	0	0	0.000126525	0.000105272	0.000448029	0	0	0	0	4.80765e-05	5.62042e-05	0.00012395	0	0.000248769	2.42668e-05	0	0	3.91486e-05	0	6.02337e-05	4.54071e-05	0	0.000179218	2.20478e-05	0.000336556	0	0.000242104	0.00016099	0.00010052	0.000278636	0	0.000194099	0.000113154	8.12645e-05
Algiphilus	9.67523e-05	0	0	4.39335e-05	0	0	4.05647e-05	0	0	0.000125006	0	8.40701e-05	9.42137e-05	0	0	0	0	5.06098e-05	0.00018949	0	0	0.00100474	0	9.52971e-05	0	0	0	0	0	6.06671e-05	0	0.000149948	0	3.7669e-05	0	6.81106e-05	0	3.58436e-05	3.30717e-05	0	0	0	4.59971e-05	0.00012924	0	9.35322e-05	0	0	0
Yonghaparkia	0.000145129	0.000184371	0.000687399	0	0	0	0.000243388	0.000217113	0	6.25029e-05	6.18888e-05	0.000420351	0.000157023	3.22622e-05	0	0	0.000173418	0.00015183	0.000315816	0.0024552	0.000365107	5.15251e-05	7.32225e-05	0.000381188	2.88459e-05	0.000463685	5.50888e-05	0	0.000284308	0.000509604	0.000349441	0.00131204	0	0	0.00121973	0.0012714	0.000203216	0.00170257	0.000463004	0	0.000417179	0	6.89957e-05	0	0.00021531	0	0.000427019	0.00173975	0.000338602
Desulfopila	0	0.000138279	0	0	0	3.1507e-05	4.05647e-05	0	0	0	0	2.80234e-05	0	0	0	5.09437e-05	0	0	4.21088e-05	0.000125448	2.70449e-05	0	0	0.000142946	0	9.83574e-05	0	0.00012493	0	6.06671e-05	0	0.000281152	0.000117446	0	0.00138538	0	0	0.00030467	6.61434e-05	0	0	0	0	0	0	0	0	0	0
Desulfobacteraceae_Group	0	3.07286e-05	5.49919e-05	0	0	0	0.000162259	0	0	0	6.18888e-05	4.20351e-05	3.14046e-05	0	0	0	0	0	6.31632e-05	3.58423e-05	0	0	0	0.000309716	0	2.81021e-05	0	0	0	2.42668e-05	0.0001248	0.000206178	0	3.7669e-05	0.00146067	0	0	7.16872e-05	7.71673e-05	0	0	0	0	0	3.79958e-05	0	0	0	2.70882e-05
Mycoplasma	6.45016e-05	0	5.49919e-05	0	0	9.45209e-05	0.000101412	0	0	0	0.00182572	0	3.14046e-05	0	0	0	0	0	6.31632e-05	0	0	0	0	0	4.80765e-05	0	0	0	5.33077e-05	0	0	0.000112461	0	0	3.01169e-05	0	0	0	3.30717e-05	0	0.000125154	0	0	0	0.000253306	0	0	0	0
Indibacter	0.000161254	0.000122914	0.000109984	0	0.000228203	0.000157535	0.000182541	0.000108556	0.000155808	4.68772e-05	0	9.80818e-05	0.000125618	8.06556e-05	0.000188748	0	0.00012387	5.06098e-05	0.000147381	0	8.11348e-05	7.72877e-05	0.000170853	4.76485e-05	0.000105768	0.000168613	0.000454483	0.000229038	0.000142154	0	0.000224641	9.37172e-05	0.000117446	0	6.02337e-05	0.00113518	0.000279422	0.000143374	4.40956e-05	0.000321258	0.0012724	9.0789e-05	0.000206987	0.00015796	0.000139318	0	0	0	0.000121897
Candidatus_Planktoluna	0	9.21857e-05	5.49919e-05	4.39335e-05	3.26004e-05	3.1507e-05	0.000243388	4.34226e-05	3.59557e-05	6.25029e-05	0.000123778	0.000784654	0.000628091	0	0	0	0	0	0	0.000179211	2.70449e-05	0	0	4.76485e-05	0	0.000140511	0	4.16432e-05	0	2.42668e-05	0	0.000187434	3.91486e-05	0	7.52921e-05	0	0	0.000286749	2.20478e-05	0	0	0	0	0	2.53306e-05	0	0	0	0
MWH_UniP1	0	0.000583843	0	0.000146445	0.000146702	3.1507e-05	0.000101412	4.34226e-05	0.000107867	0.00021876	0.000123778	9.80818e-05	0.000109916	0.000596851	0.000261343	0	4.95479e-05	0.00015183	0	3.58423e-05	2.70449e-05	0	0	7.14728e-05	0.000173075	0.000463685	6.8861e-05	0	0	0	4.99201e-05	3.74869e-05	7.82973e-05	0	4.51753e-05	4.54071e-05	7.6206e-05	0	0	9.1788e-05	4.17179e-05	5.04383e-05	0	2.872e-05	5.06611e-05	0.00060796	6.46998e-05	2.82885e-05	2.70882e-05
Sediminibacter	0	0	0	0	0	0	6.0847e-05	6.51339e-05	0	0	0	5.60467e-05	6.28091e-05	3.22622e-05	8.71143e-05	0	7.43218e-05	0	0.00018949	5.37634e-05	6.76123e-05	0	0	4.76485e-05	6.7307e-05	0	0.00012395	0	7.1077e-05	0.000145601	0	0.000112461	0	0	0	0	0	0	6.61434e-05	0	0	0	0	2.872e-05	3.79958e-05	0.000233831	2.58799e-05	4.24328e-05	5.41763e-05
Francisellaceae_Group	0	0	5.49919e-05	2.9289e-05	0	0	0	4.34226e-05	0	3.12515e-05	0	2.80234e-05	0	0	0	0.000101887	0	0	4.21088e-05	3.58423e-05	2.70449e-05	0	0	0	0	0	0	0.000104108	0	8.49339e-05	0	0	0	0	3.01169e-05	0	0	0	2.20478e-05	0.000122384	0.00039632	5.04383e-05	0.000390975	0.00011488	0.000683925	0.000280597	6.46998e-05	2.82885e-05	0
Porphyromonadaceae_Group	0	0	0	0.00016109	3.26004e-05	0	0	0	0	0	0	0	6.28091e-05	0	0	7.64156e-05	0	0	0	0	0	0	0	0	0	0	0	0.000229038	0	0	0	0	5.21982e-05	0	0	0	0	0	0	0	0	0	0	0	0	0	0	0	0
Desmarestia	0	0	0	0.000102512	3.26004e-05	9.45209e-05	0	0	0	0	0	9.80818e-05	0	0	0	5.09437e-05	0	0	6.31632e-05	0	0	0	0	0	0	0	0	0	0	0	0.000474241	3.74869e-05	0	0	0	0.00115788	0	0	0	0	4.17179e-05	0	0	2.872e-05	0	0	0	0	0
Nitratireductor	0.000967523	0.00032265	0.000769886	2.9289e-05	0	6.3014e-05	0.000141976	0.000260535	4.79409e-05	0	0.000247555	0.000420351	0.00034545	0.000161311	0	0.000101887	0.000247739	0.00015183	0.000210544	0.00261649	0.000486809	5.15251e-05	0.000170853	0.000238243	2.88459e-05	0.00039343	4.13166e-05	8.32865e-05	0.00071077	0.000485337	0.000349441	0.00149948	2.60991e-05	0	0.00182207	0.000840031	0.000152412	0.00146959	0.00140004	4.5894e-05	0.000146013	6.0526e-05	9.19942e-05	0	0.00024064	0	0.000323499	0.000721358	0.000338602
Rhodovulum	4.83762e-05	0	0	4.39335e-05	3.26004e-05	4.72605e-05	0	0.000151979	0	0	0	5.60467e-05	3.14046e-05	0	0	0	0	0	4.21088e-05	0.000519713	0	0	0	0	2.88459e-05	5.62042e-05	2.75444e-05	0	0.000231	3.64003e-05	0	3.74869e-05	7.82973e-05	0	3.01169e-05	9.08141e-05	5.0804e-05	0.00019714	6.61434e-05	0	6.25769e-05	0	4.59971e-05	0	5.06611e-05	0	0.00015528	0.000127298	0.000121897
Aestuariivita	3.22508e-05	3.07286e-05	0	7.32225e-05	0	3.1507e-05	4.05647e-05	0.000542782	0	3.12515e-05	0	7.00584e-05	3.14046e-05	0	5.80762e-05	5.09437e-05	0	5.06098e-05	4.21088e-05	0.0009319	0	0	0	0	1.92306e-05	0	2.75444e-05	6.24649e-05	5.33077e-05	6.06671e-05	4.99201e-05	0.000112461	0	5.65036e-05	3.01169e-05	0	0	0.000322592	6.61434e-05	0	4.17179e-05	2.01753e-05	0	2.872e-05	2.53306e-05	0	9.05797e-05	9.90099e-05	5.41763e-05
Burkholderia	9.67523e-05	0.00010755	5.49919e-05	0.000497913	0	0.000551372	6.0847e-05	0.000238824	0	6.25029e-05	6.18888e-05	0	0.000109916	0.00106465	5.80762e-05	0	4.95479e-05	5.06098e-05	6.31632e-05	0.000215054	4.05674e-05	0	9.763e-05	9.52971e-05	0	0.000112408	0	0	0	4.85337e-05	0.000648962	9.37172e-05	0	3.7669e-05	0.000165643	0.00124869	0	0.000107531	5.51195e-05	6.1192e-05	0.000667487	5.04383e-05	0.000367977	0.00010052	0.000405289	0	0.000439959	0.000169731	0.000216705
Stenothermobacter	6.45016e-05	0	0.000384943	0	0	0	4.05647e-05	0	0	0	0	0	0	0	0.000130672	0	0	7.59148e-05	0.000463197	0	0	5.15251e-05	0	0.000214418	1.92306e-05	0	0.0002479	0	0.000888462	0	0	0.000149948	0	0	4.51753e-05	0.000340553	0.000965275	0	0	0	4.17179e-05	0	0	0	0	9.35322e-05	0	0	0
Ochrobactrum	6.45016e-05	3.07286e-05	0	0	0	0	0.000385364	0	0	0	0	2.80234e-05	0	4.83933e-05	0	0	4.95479e-05	0	4.21088e-05	0.000448029	2.70449e-05	0	0	0	0	7.02553e-05	2.75444e-05	0	0.000159923	7.28005e-05	0	0.000299895	0	0	0.000210818	0.000136221	0	0.000161296	0.000264574	0	0	0	4.59971e-05	0	2.53306e-05	0	3.88199e-05	9.90099e-05	0.000243793
Corallomonas	0	0	0	0	0	0	0	0	0	0	0	0	0	0	0	0	0	0	0	0	0	0	0	0	0	0	0	0	0	0	0	0	0	0	0	0	0	3.58436e-05	0	0	0	0	0	0	0	0	0	0	0
Tropicibacter	0	0.000138279	0	7.32225e-05	8.15009e-05	6.3014e-05	4.05647e-05	0.000151979	0.000107867	0	0.000154722	7.00584e-05	0.000157023	9.67867e-05	0.000116152	0	0.00012387	5.06098e-05	0.000294762	0.000250896	2.70449e-05	0	0	0	6.7307e-05	0.000421532	2.75444e-05	0	0.00151039	4.85337e-05	0	3.74869e-05	0	7.53381e-05	0.000165643	4.54071e-05	0	0.000161296	4.40956e-05	0.00022947	4.17179e-05	0.000232016	0	7.17999e-05	0.000189979	0	0.0001294	0.000127298	0.000148985
Bradyrhizobium	0.000241881	0.000122914	5.49919e-05	0.000820092	0.000586807	0.000708907	0.00026367	0.000303958	0.00052735	0.000765661	0.000526055	0.000546456	9.42137e-05	0	4.35572e-05	5.09437e-05	0.000173418	0	0.000147381	0.000483871	0.00010818	0.000206101	0	4.76485e-05	3.84612e-05	0.000182664	4.13166e-05	8.32865e-05	3.55385e-05	0.000157734	9.98403e-05	0.000243665	0.000104396	5.65036e-05	0.000421636	9.08141e-05	0.000177814	0.000232983	0.000110239	3.0596e-05	0.000876077	0.000100877	0.000390975	0	0.000392624	0.000140298	0.000452899	0.000226308	0.000176073
Methylocystaceae_Group	9.67523e-05	4.60929e-05	0	0	0	0	0.000121694	0	0	0	0	7.00584e-05	0	0	0	0	0	0	4.21088e-05	0.000197133	4.05674e-05	0	0	0	0	0.000182664	0	4.16432e-05	3.55385e-05	2.42668e-05	0	0.000168691	2.60991e-05	0	0.000255993	0.000113518	0	0.000250905	7.71673e-05	0	0	0	0	0	5.06611e-05	0	0.000582298	0.000693069	0.000243793
Citromicrobium	0.000322508	6.14571e-05	0.000274959	5.8578e-05	0	3.1507e-05	0.000101412	0.000151979	2.39705e-05	0	6.18888e-05	0.000154129	0.000471069	0.000209704	0.000145191	5.09437e-05	0.000148644	7.59148e-05	0.000231598	0.000448029	0.000148747	0	4.8815e-05	0.000119121	0.000105768	0.000112408	9.64055e-05	0	0.000586385	0.000169868	4.99201e-05	0.000487329	2.60991e-05	0.000169511	0.000225876	9.08141e-05	0.000152412	0.000250905	0.000573243	0	0	0	4.59971e-05	0	2.53306e-05	0.000233831	0.00010352	0.000155587	8.12645e-05
Robiginitalea	0.000322508	0	0.000247463	0	4.89006e-05	0	0	6.51339e-05	3.59557e-05	0	0	0.00033628	0.000471069	0.000451671	0.00015971	0	0	0	0.000357925	0	0	5.15251e-05	0	9.52971e-05	0	0	0.000151494	0	0.00119054	4.85337e-05	0	0.000412356	0	0	0	0.000817327	0.00012701	0.000107531	6.61434e-05	0	0	0	0	4.30799e-05	0	0.000654726	0	0	0
Palleronia	8.0627e-05	6.14571e-05	0	0	0	0	4.05647e-05	8.68451e-05	9.58819e-05	0	0	0.000126105	0.000109916	0	0.000203267	0	0	0	4.21088e-05	0.000179211	0	0	0	0	0.000134614	2.81021e-05	0.000234128	0	0.00149262	0	0	9.37172e-05	0	0	4.51753e-05	0	5.0804e-05	8.96089e-05	0.000132287	0	0	0	0	0	0	0	0	0	0
Kiloniellaceae_Group	6.45016e-05	0.00261193	5.49919e-05	0.000234312	0.000163002	0.00143357	0.000202823	4.34226e-05	4.79409e-05	4.68772e-05	0.0002785	0.000616514	3.14046e-05	3.22622e-05	5.80762e-05	0	0	5.06098e-05	0	0	0	0	4.8815e-05	4.76485e-05	0	0.00140511	0.000358077	4.16432e-05	0	2.42668e-05	0.0001248	0	6.52477e-05	7.53381e-05	0	0.000227035	0	8.96089e-05	0.000110239	6.1192e-05	0.000104295	0	0	0	2.53306e-05	0	0	5.65771e-05	0
Cyanophora	0	0	0	0.000702936	0	0	0	0	0	0	0	0	3.14046e-05	0	0	5.09437e-05	0	0	6.31632e-05	0	0	7.72877e-05	4.8815e-05	0	1.92306e-05	0	0	0	0	0	0	0	6.52477e-05	0	0	0.000227035	0	0	3.30717e-05	3.0596e-05	0.000458897	0	4.59971e-05	0	5.06611e-05	9.35322e-05	0	0	0
Dinoroseobacter	0.000241881	0.000153643	0.000247463	0.000190379	4.89006e-05	0.000267809	0.000162259	0.000260535	9.58819e-05	0.000343766	0	0.000294245	0.000314046	9.67867e-05	2.90381e-05	5.09437e-05	0.000173418	5.06098e-05	0.000210544	0.000430108	2.70449e-05	0.000128813	7.32225e-05	9.52971e-05	4.80765e-05	0.000337225	5.50888e-05	0.000166573	0.000231	0.000169868	9.98403e-05	0.000318638	9.13468e-05	5.65036e-05	0.000165643	0.000181628	5.0804e-05	0.000286749	0.000341741	0.000137682	0.000125154	0.000191666	0.000137991	8.61599e-05	0.000291301	0.000233831	0.000452899	0.000325318	0.000257338
Tropheryma	0	0.000291921	0	0	0	0.000189042	0.000628752	0.000151979	7.19114e-05	3.12515e-05	6.18888e-05	0.000630526	0.000219832	3.22622e-05	0.000174229	0	0	0	0	0.00046595	0	7.72877e-05	4.8815e-05	0	0	0.000674451	0.000426938	0	0	7.28005e-05	0	0.000112461	0	0	4.51753e-05	0	0	0.000215061	4.40956e-05	0	0	0	0	0	0	0	0	0	2.70882e-05
Oceanisphaera	0	0	0	2.9289e-05	0	0	0	0	0	0	0	0	0	0	0	0	0	0	0	0	0	0	0	0	0	0	0	0	0	0	0	0	2.60991e-05	0	0	0	0	0	0	0.000122384	0.000271167	0.000100877	0	0	0	0	0	0	0
Aquamicrobium	0.000129003	0.00010755	0.000164976	0	0	0	4.05647e-05	0.000108556	0	0	0	0.000112093	0.000125618	4.83933e-05	0	0	4.95479e-05	0	0.000210544	0.000985663	6.76123e-05	0.000206101	0	0	0	0.00012646	2.75444e-05	0	0.000213231	0.000182001	0	0.000337382	2.60991e-05	0	0.000451753	0.000181628	5.0804e-05	0.000394279	0.000275597	0	4.17179e-05	0	0	0	6.33264e-05	0	0.000375259	0.000707214	0.000325058
Pedobacter	0.000403135	6.14571e-05	0.000192472	0.00029289	0.000163002	0.000173288	4.05647e-05	0.000217113	0	0	6.18888e-05	9.80818e-05	0.000109916	0.000371016	0.000101633	0.000127359	4.95479e-05	0.00015183	0.000126326	0.000107527	0.000283972	0.000154575	7.32225e-05	7.14728e-05	6.7307e-05	5.62042e-05	4.13166e-05	0.000416432	0.000462	0.000279069	4.99201e-05	0.000112461	0.000182694	9.41726e-05	4.51753e-05	0.00038596	0.00012701	0.000125453	0.000176382	9.1788e-05	4.17179e-05	0	6.89957e-05	2.872e-05	2.53306e-05	0.00084179	0	2.82885e-05	0.000799101
Mucispirillum	0	0	0	0	0	0	0	0	0	0	0	0	0	0	0	0	0	0	0	0	0	0	0	0	0	0	0	0	0	0	0	0	0	0	0	0	0	0	0	0	0	0	0	0	0.00067126	0	0.000802277	0.000905233	0
Lentibacter	3.22508e-05	0.000875764	0	0.000439335	0.000211902	0.000897949	0.000324517	0.000629627	0.00027566	0.000562526	0.00117589	0.000784654	0.000612389	0.000451671	0.000682396	0.000101887	7.43218e-05	0.000126525	0.00018949	0.00114695	4.05674e-05	5.15251e-05	0	7.14728e-05	0.000134614	0.000590145	0.0002479	0.000166573	0.000373154	0.000133468	7.48802e-05	0.000112461	0.00028709	9.41726e-05	7.52921e-05	0.000227035	5.0804e-05	0.000412201	0.000165358	0.000871986	0	0.000696049	0.000344978	0.000358999	0.000747252	0.000514427	0.000530538	0.000650636	0.000595939
Tropicimonas	8.0627e-05	3.07286e-05	0	0	0	4.72605e-05	8.11293e-05	0.000151979	0	3.12515e-05	0	0.000112093	4.71069e-05	0	4.35572e-05	0	0	0	0	0.000250896	4.05674e-05	5.15251e-05	0	0	4.80765e-05	9.83574e-05	9.64055e-05	0	0.000852924	0	0	0.000112461	0	0	9.03506e-05	0	5.0804e-05	3.58436e-05	6.61434e-05	0	0	0	0	0	0	0	2.58799e-05	7.07214e-05	5.41763e-05
Chitinophaga	3.22508e-05	4.60929e-05	0	4.39335e-05	0	0	0	0	0	3.12515e-05	6.18888e-05	0	0	0.000274229	8.71143e-05	0	0	0	0.000105272	0	0	0	0	0	0.000192306	0	5.50888e-05	0	0	0	0	0	0	0.000282518	0	0	0	0	0	0	0	0	6.89957e-05	5.74399e-05	2.53306e-05	0.000748258	0	0	0
Brumimicrobium	0.000774019	0	5.49919e-05	0	3.26004e-05	0	8.11293e-05	4.34226e-05	0	0	0	0.000406339	0.000675198	0.000596851	0.000203267	7.64156e-05	0	0	0.000210544	0	0.000135225	0.00010305	0.000170853	7.14728e-05	3.84612e-05	4.21532e-05	2.75444e-05	8.32865e-05	0.00094177	2.42668e-05	9.98403e-05	0.000412356	0	0	0	0.000544885	0	0	6.61434e-05	0	0.000146013	0	0	0.00015796	0	0.00140298	0	0	5.41763e-05
Aequorivita	8.0627e-05	0	5.49919e-05	2.9289e-05	0	0.000141781	6.0847e-05	4.34226e-05	0	0	0	9.80818e-05	0.000157023	0	0	0	4.95479e-05	0	8.42176e-05	5.37634e-05	6.76123e-05	5.15251e-05	4.8815e-05	0	0	0	0.000137722	0	0.000515308	2.42668e-05	7.48802e-05	0	0	0	0	0.000544885	0.000355628	5.37654e-05	2.20478e-05	3.0596e-05	0.000104295	6.0526e-05	0	7.17999e-05	0	0.000654726	0	0	0
Cryomorpha	0.000854646	0	0	0	4.89006e-05	3.1507e-05	8.11293e-05	0.000108556	0	0	0	0.000714596	0.00111486	0.000709769	0.000290381	0.000127359	7.43218e-05	0	0.000294762	8.96057e-05	0.000175792	0.00010305	4.8815e-05	4.76485e-05	0.000105768	0	0	0.000249859	0.00156369	6.06671e-05	0.000349441	0.000468586	0.000143545	0	0	0.000522181	0	0.000143374	7.71673e-05	6.1192e-05	6.25769e-05	0	0	0.000516959	0	0.00173035	0	0	0
Tissierellaceae_Group	0	3.07286e-05	0	0	0	0	0	0	0	0	0.000123778	0	0	0	0	0	0	0	0	0	0	0	0	0	0	2.81021e-05	0	0	0	0	0	0	0	0	0.000707746	0	0	0	0	0	0	0	0	0	0	0	0	0	0
Parabacteroides	9.67523e-05	0.000414836	5.49919e-05	5.8578e-05	0.000342304	0.000519865	0.000283953	0.000369092	0.000191764	6.25029e-05	0.000123778	0.000280234	0.000408259	0.000241967	0.000261343	7.64156e-05	0.000173418	5.06098e-05	0.000126326	0.000125448	5.40899e-05	0	0	0	0.000317305	0.000463685	0.000550888	0.000291503	0.000213231	0.000121334	0	9.37172e-05	0.000130495	3.7669e-05	3.01169e-05	9.08141e-05	0.000101608	8.96089e-05	9.92151e-05	0.000244768	4.17179e-05	0.00017149	0.000528967	0.000330279	0.000113988	0.000327363	5.17598e-05	0.000141443	0.00029797
Methylococcus	3.22508e-05	4.60929e-05	0	2.9289e-05	0.000211902	0	4.05647e-05	0	0.000167793	0	0	0	0	3.22622e-05	0	0	0	0.000379574	0	0	5.40899e-05	0	0	0	0	2.81021e-05	0	0	0	0	4.99201e-05	0	0	0	0	0	0	0	0	0.000122384	0	0.000110964	6.89957e-05	0.00017232	0	0	6.46998e-05	0.000466761	4.06322e-05
Mariprofundus	3.22508e-05	0	0	0.000512558	8.15009e-05	0.000157535	6.0847e-05	0	8.38966e-05	7.81287e-05	0	0.000210175	0	0	0	0	0	0	4.21088e-05	0.000179211	6.76123e-05	0	0	0	0	0	0	6.24649e-05	0	3.64003e-05	0.0001248	0	2.60991e-05	0	0	0.000431367	0	0.000824402	0.000154335	9.1788e-05	0	7.06136e-05	6.89957e-05	0.00012924	5.06611e-05	0.000187064	0	0	0
Byssovorax	0	0	0	0.000439335	0.000211902	0.000724661	0.00026367	0	0.000443454	0.000562526	0.000526055	0.000308257	0.000141321	0	0	0	0	0	0	0	0	0	0	0	0	0	0	0	0	4.85337e-05	0	0	0	0	0	0	0	0	2.20478e-05	0	0	0	0	0	0	0	0	0	0
Pseudoroseobacter	3.22508e-05	0	0.000109984	5.8578e-05	0	0	0.000141976	8.68451e-05	0	0	0	0.000140117	0.000141321	4.83933e-05	7.25953e-05	0	7.43218e-05	7.59148e-05	0	0.000376344	0	0	0	4.76485e-05	0	4.21532e-05	5.50888e-05	0	0.000319846	0.000133468	4.99201e-05	0.000206178	0	0	0.00019576	0	0	0.000161296	3.30717e-05	3.0596e-05	0	3.0263e-05	0	0	5.06611e-05	0	0.00010352	4.24328e-05	2.70882e-05
C111_Group	0.00020963	6.14571e-05	0.000412439	0	0	0.000409591	0.000243388	4.34226e-05	0	0	0	0.000532444	0.000423962	0	0	0	0.000148644	0	0.000610578	0.00129032	0.000311017	0.000437964	0.000268483	0.00033354	3.84612e-05	0.000210766	0	4.16432e-05	0.000355385	0.000303335	4.99201e-05	0.000393612	0	3.7669e-05	0.000331285	0.000227035	0.00038103	0.000663106	0.000297645	0	6.25769e-05	0	0	0	0	0	0	0.00019802	0
Ehrlichia	3.22508e-05	3.07286e-05	0.000164976	0	3.26004e-05	0	6.0847e-05	4.34226e-05	0	0	0	4.20351e-05	4.71069e-05	3.22622e-05	2.90381e-05	0	0	0	0	0.000197133	2.70449e-05	0	0	4.76485e-05	0	7.02553e-05	6.8861e-05	4.16432e-05	3.55385e-05	8.49339e-05	0	0.000168691	0	0	6.02337e-05	9.08141e-05	0	0.000107531	0.000110239	0	4.17179e-05	0	4.59971e-05	0	7.59917e-05	0	0.000478778	0.000650636	0.000230249
Dickeya	0	0	0	0.00016109	0	0	6.0847e-05	0.000108556	0	3.12515e-05	0	0	0	0.000193573	2.90381e-05	0	4.95479e-05	7.59148e-05	0	3.58423e-05	2.70449e-05	0	0	0.000142946	2.88459e-05	0	2.75444e-05	6.24649e-05	0	4.85337e-05	4.99201e-05	9.37172e-05	0	0	0.000165643	9.08141e-05	0	0.000161296	6.61434e-05	0	4.17179e-05	0	0	0	0.000151983	0	2.58799e-05	0	0.000379234
Marinosulfonomonas	0.000193505	0.0002151	0.000192472	0.000248957	0.000114101	0.000551372	0.000223106	0.00067305	0.000131838	0.000375018	0.000154722	0.000238199	0.000408259	4.83933e-05	0.000203267	0	0.000148644	0.000202439	0.000126326	0.00170251	0.00010818	0.000128813	0	0.000119121	0.00016346	0.000379379	0.000358077	0.000104108	0.000462	0.000145601	4.99201e-05	0.000318638	0.000130495	3.7669e-05	0.000331285	0.000249739	5.0804e-05	0.00069895	0.000297645	0.000351854	0.000146013	0.000312718	0.000298981	0.00011488	0.000519277	0.000233831	0.000711698	0.000862801	0.000325058
Ferrimonas	3.22508e-05	0	0	0	0.000114101	0	0	0	0	3.12515e-05	0	0	0	0.000500065	0.000188748	0.000152831	0	0	4.21088e-05	0	0	5.15251e-05	0	0	0.000894222	0	0.000358077	4.16432e-05	5.33077e-05	0	9.98403e-05	5.62303e-05	6.52477e-05	7.53381e-05	4.51753e-05	0.000227035	0	0	3.30717e-05	0	4.17179e-05	6.0526e-05	0	0	0.000189979	0	0	0	8.12645e-05
FS140_16B_02	0.000451511	0	0.000467431	0	0	0	0	8.68451e-05	0	0	6.18888e-05	2.80234e-05	0	0	0	0.000127359	0.000445931	0.0015436	6.31632e-05	0.000107527	0.000581466	0.000154575	0.000268483	0.000285891	1.92306e-05	2.81021e-05	0	0.000208216	0	0.000448937	0.000524161	0	0	0.000433194	0	0.000113518	0.00076206	0.000268827	0.000308669	0	0.000104295	0	0	0	0	0	0	0	0
Methylovorus	0	0	0	0	0	0	0	0	0	0	0	0	0	0	0	0	0	0	0	0	0	0	0	0	0	0	0	0	0	0	0	0	0	0	0	0	0	0	0	0	0	0	0	0	0	0	5.17598e-05	0	0.000474043
Corynebacterium	0.000306382	0.000261193	0.000164976	5.8578e-05	0	0.000157535	0.000628752	0.000434226	5.99262e-05	0	0.000928333	0.00099483	0.000612389	0	8.71143e-05	0	0.00012387	5.06098e-05	0.00103167	0.000985663	2.70449e-05	0.000386439	4.8815e-05	9.52971e-05	4.80765e-05	0.000477736	0.000220355	0	0.000550847	9.70674e-05	4.99201e-05	0.000224921	5.21982e-05	9.41726e-05	0.000331285	6.81106e-05	7.6206e-05	0.000555575	0.000628362	0	0	2.01753e-05	0	0	0	0	2.58799e-05	0.00019802	5.41763e-05
Frateuria	8.0627e-05	3.07286e-05	5.49919e-05	8.7867e-05	0	0	8.11293e-05	0	0	0	0	2.80234e-05	4.71069e-05	0	0	0	0	0	0	3.58423e-05	2.70449e-05	0	0	0	0	0	2.75444e-05	0	0	3.64003e-05	0	0.000131204	0	0	7.52921e-05	0	0	5.37654e-05	3.30717e-05	0	0	7.06136e-05	0	0	0.000557272	0	0.000491718	8.48656e-05	0.000311514
Pseudoruegeria	6.45016e-05	0.0004302	0.000164976	0.000629714	0.000326004	0.00149658	0.000649035	0.000412514	0.000515365	0.000859415	0.00120683	0.000294245	0.00054958	0.000532327	0.000537205	7.64156e-05	0.000247739	0.00275824	0.000547415	0.000824373	5.40899e-05	0.000128813	9.763e-05	0.000262067	0.000384612	0.0006604	0.000234128	0.000312324	0.00101285	9.70674e-05	0.000249601	0.000149948	0.000456734	0.00184578	0.000120467	4.54071e-05	0.00101608	0.00050181	0.000297645	0.00108616	8.34359e-05	0.000807013	0.000413974	0.000560039	0.000759917	0.000888556	0.000595238	0.000565771	0.000541763
Microbacterium	0.000741768	0.000184371	0.000192472	7.32225e-05	0.000130401	0.000803428	0.000527341	0	0	0	6.18888e-05	0.000840701	0.000580985	0	4.35572e-05	0	0.000173418	5.06098e-05	0.00033687	0.00145161	0.00010818	7.72877e-05	0	0.000142946	1.92306e-05	0.000196715	0.00012395	4.16432e-05	0.000213231	0.000279069	0	0.00065602	5.21982e-05	9.41726e-05	0.000527045	0.000113518	5.0804e-05	0.000788559	0.000352765	0	8.34359e-05	0	0	0	0	0	3.88199e-05	0.000183876	0
Nitrosomonadaceae_Group	0.000822395	0.000169007	0.000852374	0.000424691	0	0	8.11293e-05	0.000412514	5.99262e-05	3.12515e-05	0.000123778	0.00025221	0.000361153	0.000709769	0.00015971	7.64156e-05	0.000322061	0.000455489	0.000442142	0.00062724	0.000486809	0.000489489	0.000317298	0.000142946	0	5.62042e-05	4.13166e-05	0	8.88462e-05	0.000485337	0.000973442	0.000318638	2.60991e-05	0.000113007	0.000933622	0.0025655	0.000101608	0.000591419	0.000242526	0	8.34359e-05	0	4.59971e-05	0	0.00021531	0	0.000219979	0.00019802	0.000311514
Leptotrichia	0	0	0	0	0	0	0	0	0	0	0	0	0	0	0	0	0	0	4.21088e-05	0	2.70449e-05	0	0	0	3.84612e-05	0	0	0	0	0	0	0	0	0	0	0	0	0	0	0	0	0	0	0	0	0	0	0	0
Phycisphaeraceae_Group	0.000435386	0.0002151	0.000219968	0	0	0	0.000527341	8.68451e-05	0	0	0	0.000154129	0.000376855	0	0	0.000229247	9.90958e-05	0.000202439	0.00018949	0.000483871	0.000229882	0.000257626	4.8815e-05	0.000547958	0	0.000224817	4.13166e-05	0.000166573	0	0.000582404	0.00014976	0.000374869	9.13468e-05	0.000263683	0.000933622	0.000295146	0.000736658	0.000716872	0.000319693	0	4.17179e-05	0	0	0	0	0	0	0	0
Nonomuraea	0.000274132	0	0.000192472	0	0	0	0.000101412	0	0	0	0	8.40701e-05	9.42137e-05	0	0	0	7.43218e-05	0	0.000905339	0.00016129	2.70449e-05	0.000154575	0	0	0	0	2.75444e-05	0	0.000781847	0.000109201	0	3.74869e-05	3.91486e-05	9.41726e-05	3.01169e-05	0	7.6206e-05	0	0.000308669	0	0	0	0	0	0	0	0	0	0
Rhodopirellula	0.000467636	0.000445564	0.000934862	0	4.89006e-05	7.87674e-05	0	4.34226e-05	0	7.81287e-05	0	0.000154129	0	3.22622e-05	0	0.00104435	0.00012387	0.000657928	0.000421088	0.000663082	0.000554421	0.00100474	0.00100071	0.000547958	5.76918e-05	0.000547991	2.75444e-05	0.0007704	0.000426462	0.000376136	0.000798722	0.00103089	0.000234892	0.000244849	0.000135526	0.000522181	0.00111769	0.00030467	0.000330717	0	0.000312885	0	4.59971e-05	0	2.53306e-05	0	6.46998e-05	0	0
Paucisalibacillus	0	0	0	0	0	0	0	0	0	0	0	0	0	0	0	0	7.43218e-05	0	4.21088e-05	3.58423e-05	0	0	0	0	0	0	0	0	0	0	0	0	0	0	0	0	0	0	2.20478e-05	0	0	0	0	0	0	0	0	0	0
Noviherbaspirillum	0	0	0	4.39335e-05	0	6.3014e-05	0	0	0	0	0	0	0	0	0	0	0	0	0	7.16846e-05	0	0	0	0	0	0	0	0	0	0	0	0	0	0	0	6.81106e-05	0	7.16872e-05	0	0.000244768	0.00154356	3.0263e-05	0	0	0	0	0	0	0
Marmoricola	0.00020963	0.000153643	0.000384943	0	0	3.1507e-05	0.0003448	8.68451e-05	3.59557e-05	3.12515e-05	0	0.000112093	0.000109916	0	0.000101633	0	0.000198192	5.06098e-05	0.000421088	0.000770609	4.05674e-05	0.000257626	0	0.000119121	1.92306e-05	0.00039343	0.000192811	0	0.000675231	0.000109201	0	0.000787224	0	7.53381e-05	0.000436694	0	0.000279422	0.000232983	0.000595291	0	0	0	0	0	0	0	0	0	0
T78	0.000225755	0	0.000412439	0	0	0	0.000101412	0.000325669	3.59557e-05	0	0	0.000378316	0.000675198	0	5.80762e-05	0	0.000247739	0.00010122	0.000400034	0.000376344	0.000202837	7.72877e-05	0	7.14728e-05	2.88459e-05	2.81021e-05	0.000509572	4.16432e-05	0.000142154	0.000242668	0	0.000337382	0	0	7.52921e-05	4.54071e-05	7.6206e-05	0.000125453	0.00025355	0	0	0	0	0	0	0	0	0	0
Sulfuritalea	0	0.0002151	0	2.9289e-05	0	0	0	8.68451e-05	0	0	0	5.60467e-05	6.28091e-05	3.22622e-05	0	0	0	0	8.42176e-05	7.16846e-05	0	0.000257626	0	0.000119121	0	0.000168613	0	0	0	0.000145601	4.99201e-05	0.000149948	0	0	0.00159619	9.08141e-05	0	0.00030467	0	0	0	3.0263e-05	4.59971e-05	0	0	0	2.58799e-05	0	4.06322e-05
Actinoplanes	0.000274132	0.0002151	0.000164976	0	0	4.72605e-05	6.0847e-05	0	0	0	0	0	9.42137e-05	0	2.90381e-05	0	7.43218e-05	0	0.00052636	0.00016129	2.70449e-05	0	0	4.76485e-05	0	0.000238868	0.000302989	0	0.000195462	7.28005e-05	0	0.000224921	0	9.41726e-05	0.000255993	0	0.00012701	3.58436e-05	0.000881912	0	0	0	0	0	0	0	0	0	0
Cyanobacteriaceae_Group	0	0	0	0	0	0	0	0	0	0	0	0	0.000675198	0	0	0	0	0	0	0	0	0	0	0	0	0	0	0	0	0	0	0	0	0	0	4.54071e-05	0	0	0	0	0	0	0	0	0	0	0	0	0
Desulfotignum	0	0.000184371	0	0	8.15009e-05	0	4.05647e-05	4.34226e-05	0	0	6.18888e-05	0	0	0	0	0.000152831	0	0	0	0	0	0	0	4.76485e-05	0	0.000154562	0	0.000541362	0	0	0	3.74869e-05	0.000169644	0	0.000933622	0.000249739	0	5.37654e-05	0	0	0	0	0	0	0	0	0	0	0
VC21_Bac22_Group	0	0	0	0	0	0	0	0	0	0	0	2.80234e-05	0.000188427	0	7.25953e-05	7.64156e-05	0	0	0	0	5.40899e-05	0.000309151	0	0	0	0	0	0.000291503	3.55385e-05	0	0	0	0.000143545	0	4.51753e-05	0	0	0	0	0	6.25769e-05	0	0	0	0	0	0	0	0
Candidatus_Limnoluna	0	3.07286e-05	0	4.39335e-05	0	4.72605e-05	0.0003448	4.34226e-05	2.39705e-05	0	0	0.000644538	0.000188427	0	0	0	0	0	0	0.000179211	0	0	0	0	0	8.43064e-05	0	0	0	2.42668e-05	0	0.000131204	0	0	0.000105409	0	0	0.000125453	2.20478e-05	3.0596e-05	4.17179e-05	0	6.89957e-05	0	5.06611e-05	0	0	0.000282885	0
Jejudonia	6.45016e-05	4.60929e-05	5.49919e-05	0	6.52007e-05	0.000661647	0	0.000217113	0	0	0	2.80234e-05	0	0	0	0	0	0.000177134	6.31632e-05	0.000143369	4.05674e-05	0	9.763e-05	0	2.88459e-05	7.02553e-05	0.00012395	6.24649e-05	0.000106615	0	4.99201e-05	7.49738e-05	2.60991e-05	0	4.51753e-05	0.00031785	0.000101608	3.58436e-05	7.71673e-05	0	0	0	4.59971e-05	4.30799e-05	0	0.000140298	0	4.24328e-05	2.70882e-05
Mycobacterium	0.000854646	0.000199736	0.000962358	0.00112763	0	3.1507e-05	0.000202823	0.000130268	3.59557e-05	0	0	0.0016814	0.00155453	0	2.90381e-05	0	0.000990958	0.000632623	0.00237915	0.00340502	0.000243404	0.000309151	4.8815e-05	0.000524134	1.92306e-05	0.000519889	0.000110178	0	0.00261208	0.000218402	4.99201e-05	0.00196806	3.91486e-05	5.65036e-05	0.00275569	0	0.000711256	0.00120076	0.000496075	3.0596e-05	8.34359e-05	0	0	0	0.000202645	0	0.000711698	0.00250354	5.41763e-05
Niabella	0.000161254	0	5.49919e-05	0.00153767	0	3.1507e-05	0	4.34226e-05	0	0	0	0	0.000141321	0	0	0	4.95479e-05	7.59148e-05	0	3.58423e-05	4.05674e-05	5.15251e-05	0	0	0	0	0	0	0	4.85337e-05	0	0	0	0	4.51753e-05	0	0	0	4.40956e-05	6.1192e-05	6.25769e-05	2.01753e-05	0	0	0	0	0	0	0
Limnohabitans	9.67523e-05	0.000199736	8.24878e-05	0.000981182	0.000130401	6.3014e-05	0.000223106	0.000759895	0.000107867	0.000437521	9.28333e-05	0.000560467	0.000235534	0.000225836	2.90381e-05	0.000152831	0	0.000177134	0.000105272	0.000734767	2.70449e-05	0.000875927	0	0.000142946	1.92306e-05	0.000252919	8.26332e-05	0	8.88462e-05	0.000230535	0.000499201	0.000281152	0.000156595	9.41726e-05	0.000692688	0.000885438	7.6206e-05	0.000734793	0.000165358	7.649e-05	0.000354603	0	9.19942e-05	0	5.06611e-05	0	0.000245859	9.90099e-05	0.000243793
Pseudomonadaceae_Group	3.22508e-05	0.000307286	0	0.000922604	0	0	6.0847e-05	0.000369092	0	0	0.0002785	7.00584e-05	0.000125618	8.06556e-05	0	0	4.95479e-05	5.06098e-05	4.21088e-05	0.00046595	9.46573e-05	0	4.8815e-05	0.000119121	0	0.000449634	0.000165266	0	0	0.000109201	0.00014976	0.000243665	0	3.7669e-05	0.000798097	0	0	0.000215061	7.71673e-05	0.000321258	0.000271167	0.000524558	0	0	0.000468615	0	0.000595238	0.000141443	0.000446955
Moritella	0	3.07286e-05	0	0	0	0	0	0	0	0.000234386	0	0.000532444	0.000141321	0	0	0.00106982	4.95479e-05	0	0	0	0	7.72877e-05	4.8815e-05	0	0	0	0	0.000791222	0	2.42668e-05	0	0	0.000521982	7.53381e-05	0	4.54071e-05	5.0804e-05	0	0.000154335	0.000351854	4.17179e-05	0.000726312	0	0.00011488	0.000278636	0.000467661	0	0	0
Acidibacter	0	0	0	0	0	0	0	0	0	0	0	0	0	0	0	0	0	0	0	0	0	7.72877e-05	0	0	0.000403842	0	0	0	3.55385e-05	0	0	0	0	0	0	0	0	3.58436e-05	0	0	4.17179e-05	0	4.59971e-05	0	2.53306e-05	9.35322e-05	0	0	0
Runella	0	0	0	0	0	4.72605e-05	4.05647e-05	0	0	0	6.18888e-05	0	0	0	0	0	0	0	0	0	0	0	0	7.14728e-05	0	0	2.75444e-05	0	0	0	0	5.62303e-05	3.91486e-05	0	0	0	0	0	5.51195e-05	0.000107086	0	4.03506e-05	0	0	3.79958e-05	0	0	0	0.000325058
Candidatus_Xiphinematobacter	4.83762e-05	0	0.000109984	4.39335e-05	0	0	8.11293e-05	0.000195402	2.39705e-05	0	0	4.20351e-05	0.000518175	0	0	0	0	0	4.21088e-05	8.96057e-05	0.000189315	0	0	0	0	0	0	0	0	2.42668e-05	9.98403e-05	0.000112461	0	0	9.03506e-05	0.000181628	0	0	8.81912e-05	0	0	0	0	0	2.53306e-05	0	0	0	0
Antarcticicola	0	0	5.49919e-05	0	0	0	0	0.00017369	0	0	0	0	0	0	0	0	0	0	0	0.000752688	4.05674e-05	0	0	0	2.88459e-05	0	0	0	0	0.000327602	0.000224641	0	0	0	0	0.000295146	5.0804e-05	0.00050181	6.61434e-05	0	0	0	0	0	0	0	0	0	0
Cyclobacteriaceae_Group	8.0627e-05	0	0	2.9289e-05	0	0	8.11293e-05	4.34226e-05	0	0	0	0	0	0	2.90381e-05	5.09437e-05	0.00012387	0	0	7.16846e-05	9.46573e-05	0	4.8815e-05	0.000119121	1.92306e-05	2.81021e-05	6.8861e-05	4.16432e-05	0	0.000169868	0	0.000149948	2.60991e-05	3.7669e-05	7.52921e-05	0.000158925	0	3.58436e-05	5.51195e-05	9.1788e-05	0.00187731	2.01753e-05	0.00048297	0	0.000696591	0	0.000349379	0	0.000406322
Enterococcus	0	0	0	0	0	0	0	0	0	0	0	0	0	3.22622e-05	0	7.64156e-05	0	0	0	0	0	0	0	0	0	0	0	0	0	0	0	0	2.60991e-05	0	0	0	0	0	0	0	0	0	0	0	0.00239374	0	0.00256211	0.00287129	0
Psychroserpens	0.000225755	0.000660664	5.49919e-05	5.8578e-05	0.000195602	0.00144932	0.00026367	0.000542782	0.000167793	0.000140632	0	0.000476397	0.000973542	0.00014518	0.0006098	0	0	5.06098e-05	0.000315816	0.000268817	2.70449e-05	0.00010305	0	4.76485e-05	0.000144229	0.000744706	0.000261672	0.000166573	0.00133269	9.70674e-05	0.0001248	7.49738e-05	0.000156595	7.53381e-05	9.03506e-05	0.000499478	0.000203216	0.000448045	5.51195e-05	0.000581324	0.000250308	0.000544734	0.000896943	0.000402079	0.00024064	0.00154328	0.000219979	0.000282885	0.000311514
Turneriella	0.000258006	0	0	0	0	0	0.000101412	0.000108556	0	0	0	5.60467e-05	0	0	0	0	0.000445931	0.000126525	0.00101061	8.96057e-05	2.70449e-05	7.72877e-05	0	0	0	0	0	0	0.000213231	2.42668e-05	0	0	0	0.000113007	3.01169e-05	9.08141e-05	0.000177814	5.37654e-05	2.20478e-05	0	0	0	0	0	0	0	0	0	0
Dictyota	0	0	0	0	3.26004e-05	0	0	0	0	0	0	2.80234e-05	0	0	0	0	0	0	0	0	0	0	4.8815e-05	0	0	0	0	0	0	0	0.000249601	0	0	0	0.000135526	0.000930845	0	0	0	0	4.17179e-05	0	6.89957e-05	4.30799e-05	0	9.35322e-05	0	0	0
Weeksella	0	0	0	0.000600425	0	0	0	0	0	0	0	0	0	0	2.90381e-05	0	0	0	0	0	0	0	0	0	7.69223e-05	0	2.75444e-05	0	0	0	0	0	0	0	0	0	0	0	0	3.0596e-05	0	0	0	0	0	0	0	0	2.70882e-05
Thiogranum	8.0627e-05	0	0	0	0	0	6.0847e-05	4.34226e-05	0	3.12515e-05	0	8.40701e-05	7.85114e-05	0.000467802	2.90381e-05	0	4.95479e-05	0	0	0	2.70449e-05	5.15251e-05	4.8815e-05	4.76485e-05	0	2.81021e-05	0	0.000145751	3.55385e-05	0	0.000499201	5.62303e-05	0.000130495	0	3.01169e-05	0.000930845	5.0804e-05	0	2.20478e-05	0	0	0	0	0	2.53306e-05	0	0	0	0
Vitellibacter	0	0	0	0	0	0	0	0	0	0	0	0	0	0	0	0	0	0	0	3.58423e-05	0	0	0	0	0	0	0	0	7.1077e-05	0	0	0	0	0	0	0	0	0	0	0	0	0	0	0	0	0.000187064	0	0	0
Christensenellaceae_Group	4.83762e-05	0	0	8.7867e-05	0	0.000173288	0	8.68451e-05	0	0	0	8.40701e-05	0.000125618	6.45245e-05	5.80762e-05	5.09437e-05	0	0.00010122	4.21088e-05	0.000107527	0	5.15251e-05	0	0	0	0	5.50888e-05	8.32865e-05	0	2.42668e-05	7.48802e-05	0.000149948	5.21982e-05	0.000131842	0	9.08141e-05	5.0804e-05	3.58436e-05	8.81912e-05	0	0.000250308	2.01753e-05	0	0	0	0	0	2.82885e-05	5.41763e-05
Serpens	3.22508e-05	0.00010755	0	0.000146445	0	0	0	8.68451e-05	0	0	0	0	0	0	0	0	7.43218e-05	0	0	0.000179211	2.70449e-05	0	0	0	0	0.00012646	2.75444e-05	0	0	0	0	0	0	0	0.000165643	0	7.6206e-05	8.96089e-05	0	0	4.17179e-05	0	0	0	0.000113988	0	0.000517598	0.000226308	0.000230249
Frankia	9.67523e-05	3.07286e-05	8.24878e-05	0	0	0	0	0	0	0	0	0	3.14046e-05	0	2.90381e-05	0	0	0	0.000147381	0.000268817	0.00010818	7.72877e-05	0	4.76485e-05	1.92306e-05	2.81021e-05	0	0	0.000231	2.42668e-05	0	0.000749738	0	3.7669e-05	0.00019576	0	5.0804e-05	8.96089e-05	0.000143311	0	0	0	4.59971e-05	0	0	0	2.58799e-05	0	0
Acidothermus	0.000322508	0	0.000274959	0	0	0	0.000121694	0	0	4.68772e-05	0	0.00016814	0.000141321	0	2.90381e-05	0	7.43218e-05	0	0.000547415	0.000358423	8.11348e-05	0.000154575	0	0	4.80765e-05	0	9.64055e-05	0	0.000533077	7.28005e-05	0	0.000374869	0	3.7669e-05	0.000150584	0	0.000177814	0.000143374	0.000209454	0	0	0	0	0	0	0	0	0	0
Caldilineaceae_Group	0.000951398	0.000153643	0.00118233	0	3.26004e-05	0	0.000182541	0	0.000107867	0	0	0.000420351	0.000471069	0	0	0.000101887	0.000222965	7.59148e-05	0.00071585	0.00189964	0.000202837	0.000927453	9.763e-05	0.000524134	0	0.000323174	0	8.32865e-05	0.00149262	0.000630938	0.000424321	0.00174314	3.91486e-05	5.65036e-05	0.00182207	0.000794624	0.000685854	0.00109323	0.00104727	0	0	0	0	0	0	0	5.17598e-05	0	0
MSBL3	0	3.07286e-05	0	0	0	0.000157535	8.11293e-05	0	0	0	0	0	0	0	0	0.000127359	0.000173418	0.000455489	0.000400034	8.96057e-05	0.000135225	0.0012366	0.000317298	9.52971e-05	0	5.62042e-05	0	0	0.000604154	0	0	0	0	0.000527367	7.52921e-05	0	0.00236238	0.000107531	0	0	0	0	0	0	0	0.000280597	2.58799e-05	0	0
Bdellovibrio	0.00104815	0.000153643	0.000852374	0	3.26004e-05	6.3014e-05	0.000202823	0.00017369	2.39705e-05	9.37544e-05	0.000649833	0.000448374	0.000251237	0.000193573	0.000145191	0.000534909	0.000272513	0.000202439	0.000421088	0.000250896	0.000338062	0.000618302	0.000146445	0.00111974	0	5.62042e-05	0	0.000187395	0.000284308	0.000570271	0.000424321	0.000393612	5.21982e-05	0.000150676	0.000301169	0.000340553	0.000330226	0.000465967	0.000914984	3.0596e-05	0	0	0	0	6.33264e-05	0	0	0.000113154	8.12645e-05
Aeropyrum	3.22508e-05	0	0	4.39335e-05	0	7.87674e-05	0	0	5.99262e-05	3.12515e-05	6.18888e-05	0	0	0	0	0	0	5.06098e-05	0	0	9.46573e-05	0	0	0.00033354	0	0	0	0	0	3.64003e-05	0	0.00125581	0	0	0.00147573	4.54071e-05	0	0	6.61434e-05	0	0.000125154	2.01753e-05	0	0	0.000151983	0	2.58799e-05	0	0
Escherichia_Shigella	0.000129003	6.14571e-05	0.000769886	2.9289e-05	3.26004e-05	0.000126028	4.05647e-05	4.34226e-05	0	0	0.000185667	0	7.85114e-05	8.06556e-05	0.000246824	0	0	0	0.000168435	0	2.70449e-05	7.72877e-05	0	0	0.000211536	8.43064e-05	0.00012395	0	0.000266539	0.000182001	0	0	0	5.65036e-05	6.02337e-05	4.54071e-05	0	3.58436e-05	4.40956e-05	0	0.000542333	7.06136e-05	4.59971e-05	0	0.000379958	0	0.000608178	0.000367751	0
Malawimonas	0.000193505	0	0.000329951	0.00016109	0	0	0.000121694	8.68451e-05	0	0	0	0.000210175	4.71069e-05	0	0	0.000101887	0.000247739	0.000126525	6.31632e-05	3.58423e-05	5.40899e-05	0.000154575	9.763e-05	7.14728e-05	0	0	0	0.000270681	0.000124385	0.000473203	0.000399361	0	0.000117446	0	3.01169e-05	0.000544885	0	8.96089e-05	0.000231502	6.1192e-05	0.000542333	5.04383e-05	0.00016099	5.74399e-05	0.000278636	0.000561193	0.00010352	0.000141443	0.000121897
Pelomonas	0	0	0	0	0	0	0	0	0	0	0	0	0	0	0	0	0	0	0	0	0	0	0	0	0	0	0	0	0	0	0	0	0	0	4.51753e-05	0	0	0	2.20478e-05	7.649e-05	0.00189817	5.04383e-05	0	0	0	0	0	0	0
Phaeocystidibacter	0.000112878	0	8.24878e-05	0	0	0	0	0	0	0	0	8.40701e-05	0.000125618	0.000193573	2.90381e-05	0.000101887	0	0	0	0	0	0	0	0	0	0	0	0.000145751	0.000408693	0	0	3.74869e-05	5.21982e-05	0	0	0.000158925	0	0	9.92151e-05	0	0	0	0	4.30799e-05	0	0	0	0	0
Planococcus	0	0	0	0	0	0	0	0	0	0	0	0	0	0	0	0	0.000148644	0	6.31632e-05	7.16846e-05	0	0	0	0	0	0	0	0	0	0	0	0	0	0	0	0	0	0	0.000110239	0	0	0	0	0	0	0	0	0	0
Desulfovibrio	0.000112878	6.14571e-05	0.000164976	2.9289e-05	0	0	8.11293e-05	4.34226e-05	0	0	0.000123778	4.20351e-05	0	0	0.000130672	0	0	0	0.000378979	7.16846e-05	0	0	0	0	0	2.81021e-05	0	0	3.55385e-05	0.000157734	0	3.74869e-05	0	0	0.000225876	0	0	0.000107531	4.40956e-05	0	4.17179e-05	0	0	0	0.00173514	0	0.00128106	0.00125884	2.70882e-05
Ignicoccus	0	0	0	0.000102512	0	0	0	4.34226e-05	0	4.68772e-05	0	0	0	4.83933e-05	0	0	0	0	6.31632e-05	3.58423e-05	0	0	0	0	0	0	0	0	3.55385e-05	2.42668e-05	0	0.000412356	0	0	0.00057222	4.54071e-05	0	0	4.40956e-05	3.0596e-05	0	0	0	0	6.33264e-05	0	0	0	0
Bacteroides	0.000129003	0.000199736	0.000164976	2.9289e-05	9.78011e-05	0.000551372	0.000101412	0.00017369	0.000191764	0	6.18888e-05	0.000280234	0.000643794	3.22622e-05	0.000638838	7.64156e-05	0.000222965	0.000227744	0.00176857	5.37634e-05	6.76123e-05	7.72877e-05	4.8815e-05	7.14728e-05	0.00032692	0.000337225	0.000605977	0.000312324	0.000444231	3.64003e-05	0	0.000168691	9.13468e-05	0.000169511	4.51753e-05	4.54071e-05	0.000152412	0.000107531	0.000132287	0.000198874	0.000187731	0.000232016	0.000137991	0.00010052	0.000113988	0.000140298	0.00014234	0.000127298	0.000257338
Nereida	0	0.000353379	0	0.00016109	0	0.00031507	8.11293e-05	6.51339e-05	0.000119852	0.000171883	0.000123778	8.40701e-05	4.71069e-05	0	4.35572e-05	0	0	0	0	0	0	0	0	0	0	0.000210766	0	4.16432e-05	0.000124385	2.42668e-05	0	0	6.52477e-05	0	0	0	0	0	0	0.000336556	0	0.000464032	0.000344978	0.000459519	0.000354628	0.000140298	3.88199e-05	2.82885e-05	0.000216705
Rhodocyclus	4.83762e-05	0	0	0.000205023	0	0	0	6.51339e-05	0	0	6.18888e-05	0	3.14046e-05	0.000612982	0	0	4.95479e-05	0	0	8.96057e-05	0	0	7.32225e-05	0	0	0	0	0	0	0.000145601	0.000299521	0	0	0	0.000135526	0.00070381	0	0	8.81912e-05	0	0.000292026	0	0.000229986	0	0.000265971	0	0.00015528	5.65771e-05	0.000108353
Pseudoalteromonadaceae_Group	0	0	0	0	0	0	0	0	0	0.000671906	0	9.80818e-05	0.000125618	0	0	0	0	0	0	0	0	0	0	0	0.000269228	0	0.000220355	0	0	0	0	0	0	0	3.01169e-05	0	0	0	0	3.0596e-05	4.17179e-05	0	0	0	8.8657e-05	9.35322e-05	0	0	0
Trebouxia	0	0	0	0.000117156	8.15009e-05	0.000110274	6.0847e-05	4.34226e-05	0.000119852	0.000140632	6.18888e-05	5.60467e-05	4.71069e-05	0	0	0.000331134	0	7.59148e-05	0	0	2.70449e-05	0.000309151	0	0	0	0	0	0.000249859	0	3.64003e-05	0.000324481	0	7.82973e-05	0	0.00057222	0.000113518	0	0	0	0	0	0	0	2.872e-05	0.00024064	0	2.58799e-05	0	0
endosymbionts	3.22508e-05	0	0	5.8578e-05	8.15009e-05	0.000141781	0	0	0	0	0.000154722	2.80234e-05	0	0.000451671	2.90381e-05	0	0	0	4.21088e-05	0	0	0	9.763e-05	0	0	0	4.13166e-05	8.32865e-05	8.88462e-05	0	7.48802e-05	3.74869e-05	3.91486e-05	0	0	9.08141e-05	5.0804e-05	5.37654e-05	0.000187406	0	0	0.000161403	4.59971e-05	8.61599e-05	0.000101322	0	0	5.65771e-05	6.77204e-05
Fervidicoccus	0	0	0	0.000117156	0	0	0	0	2.39705e-05	4.68772e-05	6.18888e-05	0	0	0.00014518	7.25953e-05	0	0	0	0	0	0	5.15251e-05	0	0.000214418	0	0	0	0	0	7.28005e-05	4.99201e-05	0.00193057	0	0	0.00137032	0	0	0	8.81912e-05	0	0	0	0	0	5.06611e-05	0	2.58799e-05	0	0
Xanthobacillum	0	6.14571e-05	0	0	0	0.000126028	0	0	0	0	0	0	0	4.83933e-05	0	0	0	0	0	0	0	0	0	0	0	0	0	0	0	0	0	0	0	0	4.51753e-05	0	0	0	0	0	0	0	0	0	0	0.000233831	0	0	0
Thiocapsa	0.000258006	3.07286e-05	0.000467431	0	0	0	0	0.00017369	0	0	0	0.000294245	0.000675198	0	4.35572e-05	5.09437e-05	0.000173418	5.06098e-05	0.000315816	0.000394265	2.70449e-05	0	4.8815e-05	0	0	0	0.000564661	0	3.55385e-05	0.000169868	0.0001248	9.37172e-05	0	3.7669e-05	0.000120467	0.000136221	7.6206e-05	0.000161296	0.000165358	0	0	0	4.59971e-05	0	0	0	0	0	0
Rhodoplanes	0.000467636	0.000276557	0.000769886	0	0	3.1507e-05	0.000791011	0	0	0	6.18888e-05	0.000224187	6.28091e-05	3.22622e-05	0	0	0.000148644	7.59148e-05	0.000757959	0.000967742	0.000148747	5.15251e-05	0	0.000357364	0	0.000576094	0	4.16432e-05	0.000462	0.000266935	9.98403e-05	0.0012933	0	0	0.00198771	0.000227035	0.000203216	0.000824402	0.000308669	0	0.000125154	0	0	2.872e-05	7.59917e-05	0	0.000219979	0.000381895	0.00029797
Plesiocystis	0.000177379	0	0	0	0	3.1507e-05	0	0	0	0.000250012	0	0.000462386	0	0	7.25953e-05	0	0	0	0.000210544	3.58423e-05	4.05674e-05	0.00177762	0	0	0	0	0	0	0.000213231	0.000182001	0.00017472	3.74869e-05	0	0	0.000466811	0.000227035	0	0	0.000209454	0	0	0	0	0	0	0	2.58799e-05	0	0
Prevotella	0.000177379	0.000245829	0.000164976	8.7867e-05	8.15009e-05	0.000504112	0.000425929	6.51339e-05	0.000371542	4.68772e-05	9.28333e-05	0.000280234	0.000533878	3.22622e-05	0.00384755	0.000101887	0.000272513	0.000126525	0.00749537	0.000125448	0.000378629	0.000206101	7.32225e-05	0.000238243	0.000557687	0.00026697	0.000853877	6.24649e-05	0.00047977	0.000315469	0	0.000168691	9.13468e-05	3.7669e-05	0.000255993	4.54071e-05	0.000101608	0.000125453	0.000374813	0.000183576	0.000146013	0.000262279	0.000114993	7.17999e-05	0.000113988	9.35322e-05	2.58799e-05	7.07214e-05	0.000270882
Gramella	0.000241881	0.000691393	0.000687399	0	3.26004e-05	0.000283563	6.0847e-05	4.34226e-05	5.99262e-05	0	0.000154722	0.00033628	0.00034545	0.00014518	0.000406534	0	4.95479e-05	0	0.000694795	0	0	0.00010305	9.763e-05	4.76485e-05	5.76918e-05	0.000646349	0.000523344	0	0.00213231	4.85337e-05	0.0001248	0.000224921	0	3.7669e-05	0	0.000930845	0.000203216	3.58436e-05	0.000143311	0	0.000229449	3.0263e-05	4.59971e-05	2.872e-05	2.53306e-05	0.000187064	0	0	8.12645e-05
Polaromonas	0	0.000122914	5.49919e-05	0.00016109	0.000114101	0.000299316	6.0847e-05	0.000607916	4.79409e-05	0.000125006	0.000123778	5.60467e-05	7.85114e-05	4.83933e-05	4.35572e-05	0	0	0.000126525	0	0.000232975	0	5.15251e-05	0	0	2.88459e-05	5.62042e-05	2.75444e-05	0	7.1077e-05	2.42668e-05	0.000324481	3.74869e-05	3.91486e-05	3.7669e-05	4.51753e-05	0.000544885	0	0.000465967	4.40956e-05	9.1788e-05	0	4.03506e-05	9.19942e-05	5.74399e-05	2.53306e-05	0.000140298	0	0	2.70882e-05
Sebaldella	0	0	0	0	0	0	0	0	0	0	0	0	0	0	0	0	0	0	0	0	0	0	0	0	1.92306e-05	0	0	0	0	0	0	0	0	0	0	0	0	0	0	0	0	0	0	0	0	0	0	0	0
Maribacter	0	0	0.000164976	5.8578e-05	3.26004e-05	0.00200069	0.000223106	0.000477648	5.99262e-05	0	0	9.80818e-05	0.000423962	0	0.000493648	5.09437e-05	0	0	0.000610578	0.000949821	0	5.15251e-05	0	0	0	2.81021e-05	0.000151494	0.000104108	0.00168808	2.42668e-05	0	7.49738e-05	0.000143545	0	0	0.000681106	7.6206e-05	0.000967777	3.30717e-05	9.1788e-05	0.00020859	0.000232016	0.000689957	5.74399e-05	0.0009119	0.00168358	0.00210921	0.000664781	0.000419866
Zymomonas	0.000241881	4.60929e-05	0.000439935	0	0	0	4.05647e-05	8.68451e-05	3.59557e-05	0	0	2.80234e-05	0.000172725	8.06556e-05	2.90381e-05	0.000178303	9.90958e-05	5.06098e-05	4.21088e-05	0.000860215	0.000378629	5.15251e-05	4.8815e-05	4.76485e-05	0	4.21532e-05	4.13166e-05	8.32865e-05	0.000195462	0.000218402	9.98403e-05	0.000468586	2.60991e-05	0.000131842	0.000301169	0	0.000101608	0.000591419	0.000374813	0	0	0	0.000137991	2.872e-05	0.000189979	9.35322e-05	0.00119048	0.00131542	0.000717836
Rhopalodia	0	0	0	0	0	0	0	0	0	0	0	0	0.000580985	0	0	0	0	0	0	0	0	0	0	0	0	0	0	0	0	0	0	0	0	0	0	0	0	0	0	0	0	0	0	0	0	0	0	0	0
Thermobacillus	0	0	0	0	0	0	0	0	0	0	0	0	0	0	0	0	0	0	6.31632e-05	3.58423e-05	0	0	0	0	0	0	0	0	0	0	0	0	0	0	0	0	0	0	4.40956e-05	0	0	0	0	0	0	0	0	0	0
Shimia	0.000112878	9.21857e-05	5.49919e-05	7.32225e-05	0.000130401	0.000236302	0	0.000434226	4.79409e-05	0.000187509	0	0.000112093	7.85114e-05	0.000258098	2.90381e-05	0	4.95479e-05	5.06098e-05	0	0.00078853	9.46573e-05	0	0	4.76485e-05	7.69223e-05	9.83574e-05	0.000206583	0	0.000426462	6.06671e-05	0	0.000131204	5.21982e-05	9.41726e-05	0	0	5.0804e-05	0.000448045	0.000132287	0	8.34359e-05	8.07013e-05	0.000137991	0	0.000126653	9.35322e-05	0.000310559	0.000424328	0.000176073
Blastomonas	0.00041926	6.14571e-05	0.000384943	0.000117156	0	0	0.000223106	0.000325669	2.39705e-05	0	0	0.000210175	0.000266939	3.22622e-05	0	0	0.000173418	0	0.000210544	0.00112903	0.000256927	0	4.8815e-05	0.000262067	1.92306e-05	2.81021e-05	0.000151494	4.16432e-05	0.000266539	0.000509604	0	0.000693507	0	9.41726e-05	0.000331285	0.000204332	0.000355628	0.000770637	0.000518123	0	4.17179e-05	0	0.000252984	0	2.53306e-05	0	0.000892857	0.00155587	0.000541763
Wenxinia	0	6.14571e-05	0	2.9289e-05	0	0	6.0847e-05	4.34226e-05	0	3.12515e-05	0	0	0.000157023	0	4.35572e-05	0	4.95479e-05	0	0	7.16846e-05	0	0	0	0	4.80765e-05	0	5.50888e-05	0	0.000586385	2.42668e-05	0	0	0	0	3.01169e-05	0	0	7.16872e-05	0.000110239	0	0	2.01753e-05	0	0	0	0	2.58799e-05	2.82885e-05	0
SV1_3	0	3.07286e-05	0	0	0	3.1507e-05	0.000141976	0	0	0	0	0.000504421	0.000157023	0	0	0	0	0	0	3.58423e-05	0	0	0	0	0	0	0	0	0	0	0	0	2.60991e-05	0	0	0	0	0	0	0	0	0	0	0	0	0	0	2.82885e-05	2.70882e-05
Gordonibacter	3.22508e-05	0.00010755	0	0	0	0	0	0	0	0	0	5.60467e-05	3.14046e-05	4.83933e-05	0	0	0	0	0	0	0	5.15251e-05	0	0	0.000105768	0.000238868	0	0	3.55385e-05	0	0	3.74869e-05	0	0	0	0	0	3.58436e-05	0	0	0	0	0	0	0	0	0	0	0
Thiobacillus	0	3.07286e-05	5.49919e-05	0.000336824	0	9.45209e-05	0	0.000217113	3.59557e-05	0	0	2.80234e-05	4.71069e-05	0.000612982	2.90381e-05	0	0	5.06098e-05	0.000105272	8.96057e-05	8.11348e-05	0	7.32225e-05	0.000190594	0	5.62042e-05	5.50888e-05	0	0	0	0.000249601	7.49738e-05	0	0	0.000225876	0.000567588	0	8.96089e-05	7.71673e-05	3.0596e-05	8.34359e-05	0	0	0	2.53306e-05	0	2.58799e-05	0	0
Francisella	0	3.07286e-05	0	0.000248957	0.000391204	6.3014e-05	8.11293e-05	0.000303958	0.000443454	0.000203135	0	0.000112093	9.42137e-05	6.45245e-05	0	0.000178303	0	0.000430184	4.21088e-05	0	0	0	4.8815e-05	0	0	8.43064e-05	2.75444e-05	0.000166573	5.33077e-05	0	4.99201e-05	0	0.000378437	0	7.52921e-05	0	7.6206e-05	3.58436e-05	8.81912e-05	0.000168278	0	0.00017149	0.00032198	0.00025848	0.000151983	0	0	0	4.06322e-05
Pseudoclavibacter	3.22508e-05	0	0	0	0	6.3014e-05	0.000385364	0	0	0	0	0.000686573	0.00020413	0	0	0	0	0	0	0.000232975	6.76123e-05	0	0	4.76485e-05	0	7.02553e-05	0	0	0.000124385	0	0	0.000168691	0	0	0.000225876	0	0	0.000107531	0	0	0	0	0	0	0	0	5.17598e-05	0	0
so4B24	0	0	0	0	0	0	0	0	0	0	0	5.60467e-05	0	0	0	0	0	0	0	0	0.00010818	0	0.000219668	0	0	0	0	0	0	8.49339e-05	0.000349441	0	0	0	0	0.000794624	0	5.37654e-05	2.20478e-05	0	0	0	0	0	0	0	0	0	0
Microbulbifer	0.000387009	3.07286e-05	5.49919e-05	0.000219668	3.26004e-05	0	0	0	0	3.12515e-05	0	0.000126105	3.14046e-05	0.000225836	5.80762e-05	0	0.000445931	0	6.31632e-05	3.58423e-05	6.76123e-05	0.000231863	0.000170853	0.000119121	3.84612e-05	0	5.50888e-05	0.000145751	3.55385e-05	3.64003e-05	0.000923522	0.000187434	0.000156595	9.41726e-05	3.01169e-05	0.000840031	7.6206e-05	8.96089e-05	7.71673e-05	0	0.000458897	2.01753e-05	0.000114993	0.00015796	0.000164649	0.000233831	0	0	0.000108353
Candidatus_Riegeria	0	3.07286e-05	0	0.000219668	0.000423805	0.000189042	0.000121694	4.34226e-05	0.000407498	0.000406269	6.18888e-05	0.000280234	3.14046e-05	0.00014518	0	0	0	0	0	0	0	0	4.8815e-05	0	0	0	0	0	0	0	9.98403e-05	5.62303e-05	3.91486e-05	0	0	0.000476774	0	0	0	6.1192e-05	0.000312885	0	0	0	2.53306e-05	0	0	0	0
Pythium	0	0	0	0.000117156	6.52007e-05	0	0.000202823	0.000130268	2.39705e-05	9.37544e-05	6.18888e-05	4.20351e-05	3.14046e-05	0	0	7.64156e-05	0	0	4.21088e-05	0	0	0.00010305	4.8815e-05	0	4.80765e-05	0	0	0	0	0	0.00014976	3.74869e-05	7.82973e-05	0	0	0.000340553	0	0	4.40956e-05	0	0.000125154	0	0	2.872e-05	0.00043062	0.000233831	0.000219979	0	0
Castellaniella	0	0	0	0.000922604	0	0	0	0	0	0	0	0	0	3.22622e-05	0	0	0	0	0	0	0	0	0	0	0	0	0	0	0	0	0	0	0	0	0	0	0	0	0	0	0	0	0	0	0	0	0	0	0
Alkalimonas	3.22508e-05	0	0	0.000205023	0	0	0	0	0	0	0.000123778	0	0	0	0	0	0	0	0	3.58423e-05	0	0	7.32225e-05	0.000214418	0	0	0	0	0	0	0.00017472	0	0	0	0.000165643	4.54071e-05	0	0	6.61434e-05	0	0	0	0	0	0.000113988	0	0	0	0.000528219
Rhodobiaceae_Group	0.000241881	6.14571e-05	0.000109984	0	9.78011e-05	0	0	0	4.79409e-05	0	0	0	0	0	0	0.000178303	9.90958e-05	0	0	7.16846e-05	5.40899e-05	5.15251e-05	0.000170853	0.00016677	1.92306e-05	5.62042e-05	0	0.000208216	5.33077e-05	0.000242668	4.99201e-05	0.000243665	0.000156595	0	0.000150584	0.000590292	0	0.00019714	4.40956e-05	6.1192e-05	0.000709205	2.01753e-05	0.000114993	0	0	0	7.76398e-05	5.65771e-05	0.000121897
Geobacter	0.000112878	0.000138279	0.000302455	0.000219668	3.26004e-05	9.45209e-05	0.000202823	0.000238824	4.79409e-05	4.68772e-05	9.28333e-05	0.000238199	0.000157023	0.000129049	0	0.000152831	7.43218e-05	0.000278354	0.000126326	0.000304659	0.00010818	5.15251e-05	0.000268483	0.000190594	0	4.21532e-05	0	0.000145751	0.000337616	0.000157734	0.00017472	0.000224921	3.91486e-05	9.41726e-05	0.000451753	0.000476774	0.000203216	0.000125453	0.000341741	7.649e-05	0	5.04383e-05	4.59971e-05	0.00011488	0.000126653	9.35322e-05	0.000427019	0.00039604	0.000108353
Moraxella	0.00020963	6.14571e-05	0	0	0	0.00036233	0	4.34226e-05	0	7.81287e-05	0	9.80818e-05	0.000157023	0	0	0	0.00012387	0	0.000652687	0	0	0.000283388	0	0	0.000105768	0	4.13166e-05	0	0.000870693	6.06671e-05	4.99201e-05	0	3.91486e-05	0	0	0	0	0	4.40956e-05	0	4.17179e-05	0	0	5.74399e-05	0.000113988	9.35322e-05	7.76398e-05	0	2.70882e-05
Aliidiomarina	0	0	0	0.000117156	0	0	4.05647e-05	0	0	3.12515e-05	0	0	7.85114e-05	0.000177442	2.90381e-05	0	0	0	0	0	0	0	0	0	1.92306e-05	0	2.75444e-05	8.32865e-05	0	0	7.48802e-05	3.74869e-05	0	0	0	0.000136221	0	0	3.30717e-05	0	0.00114724	0	4.59971e-05	0	0.00024064	0	0	5.65771e-05	0.000636572
Roseivirga	0	0	0.000109984	2.9289e-05	0	4.72605e-05	0	4.34226e-05	3.59557e-05	3.12515e-05	9.28333e-05	4.20351e-05	3.14046e-05	3.22622e-05	8.71143e-05	0	4.95479e-05	0	0	3.58423e-05	0	0	4.8815e-05	0	0	0	0	0	0	3.64003e-05	0	5.62303e-05	2.60991e-05	0	0	0	7.6206e-05	0.000179218	0	0	0	0	0	0	2.53306e-05	0.000140298	0	0	8.12645e-05
Pleurozia	0	0	0	0.000102512	0.000146702	0.000157535	0	0	3.59557e-05	9.37544e-05	0.000185667	2.80234e-05	3.14046e-05	0	0	0	0	0	0	0	0	0	0	0	0	0	0	4.16432e-05	0	0	0	0	0	0	0	0	0	0	0	3.0596e-05	0	0	0	0	0.000417954	0	6.46998e-05	0	0
Acanthamoeba	0	0	0.000219968	0.000102512	0	0	0.000101412	0	0	0	6.18888e-05	0.00025221	0	3.22622e-05	0	0	0	0.000126525	0.000421088	0.00016129	2.70449e-05	0.00010305	0.000170853	0.000285891	0	0.000112408	0	0	8.88462e-05	7.28005e-05	0.00142272	0.000112461	0	9.41726e-05	0.000692688	0.00108977	0	0.000215061	3.30717e-05	0	0.000250308	2.01753e-05	0	0	0.000417954	9.35322e-05	2.58799e-05	0	0.000230249
PRD01a011B	0	0.000384107	5.49919e-05	0.000205023	0.000358604	6.3014e-05	0.000141976	0.000282247	0.000299631	0.000750035	0.000309444	0.00025221	0.000282641	0.000129049	0.000145191	5.09437e-05	0	0.000354269	6.31632e-05	0	4.05674e-05	0.00010305	0.000122038	0.000119121	0.000105768	0.000449634	0.000179039	0.000187395	7.1077e-05	2.42668e-05	9.98403e-05	0	0.000117446	7.53381e-05	0	0	0.000177814	0	2.20478e-05	0.000198874	0	0	0	7.17999e-05	2.53306e-05	9.35322e-05	9.05797e-05	4.24328e-05	0.000121897
Cytophaga	0.000129003	0	0.00013748	0.000146445	0	0	6.0847e-05	4.34226e-05	0	0	0	7.00584e-05	0.000188427	4.83933e-05	4.35572e-05	0	4.95479e-05	0	6.31632e-05	5.37634e-05	0.000175792	0.000180338	0	4.76485e-05	0	0.000435583	0	0	0.000177692	0.000230535	4.99201e-05	0.000356125	0	0	0.000346344	0.000136221	0.000228618	3.58436e-05	0	3.0596e-05	8.34359e-05	2.01753e-05	0	0	0.000139318	9.35322e-05	2.58799e-05	0	0.000230249
Lacinutrix	8.0627e-05	7.68214e-05	0	0	0	0.000378084	0	0.000108556	3.59557e-05	3.12515e-05	6.18888e-05	5.60467e-05	0.000486771	0	0.000174229	0	0	5.06098e-05	0.000378979	7.16846e-05	0	0	0	0	0.000105768	0.000168613	0.000110178	0	0.000177692	4.85337e-05	0	0	0	3.7669e-05	3.01169e-05	0	0	0	2.20478e-05	6.1192e-05	0.000876077	0.000353068	0.00197788	0.00018668	8.8657e-05	0.000514427	7.76398e-05	0	8.12645e-05
Halochromatium	0	6.14571e-05	0	0	0	0	0	0	0	0	0	5.60467e-05	6.28091e-05	0.000177442	4.35572e-05	0	0	0	0	0	0	0	4.8815e-05	0	0	5.62042e-05	0	0	0	0	4.99201e-05	5.62303e-05	0	0	3.01169e-05	0.000113518	0	0	5.51195e-05	7.649e-05	0	0	6.89957e-05	0	0	0	0	0	0
OM27	8.0627e-05	4.60929e-05	0.00107234	2.9289e-05	3.26004e-05	6.3014e-05	0	0	2.39705e-05	0	0	0.000196164	3.14046e-05	3.22622e-05	0	0.000305662	0.000545027	0.0010375	8.42176e-05	7.16846e-05	0.00125759	0.000309151	0.00039052	0.000810025	0	0	2.75444e-05	0.000333146	3.55385e-05	0.00190495	0.000549121	0.000487329	0.000143545	0.000866388	0.000813155	0.000272442	0.00177814	0.00069895	0.000881912	6.1192e-05	0.000312885	0	0	0	0	0.000280597	0	0	0
Chryseobacterium	6.45016e-05	4.60929e-05	0	0.000146445	0	0	0	0	7.19114e-05	0	0	2.80234e-05	4.71069e-05	0	7.25953e-05	0	0.00012387	0	4.21088e-05	0	0.000121702	0	0	0	8.65376e-05	0	2.75444e-05	0	0	0.000206268	0	0	0	0	0	0	0.000152412	7.16872e-05	4.40956e-05	0	0	0	4.59971e-05	0	3.79958e-05	9.35322e-05	0	0	0
Thiotrichaceae_Group	3.22508e-05	0	5.49919e-05	0.000380757	0.000293403	0.000220549	0	4.34226e-05	2.39705e-05	0.000140632	6.18888e-05	0.000140117	0.000157023	0.00148406	0	0.000101887	0	7.59148e-05	0.00033687	0	6.76123e-05	5.15251e-05	9.763e-05	4.76485e-05	0.000278843	0	2.75444e-05	0.000187395	0.000124385	2.42668e-05	0.00017472	0	2.60991e-05	0	0	0.000749217	5.0804e-05	3.58436e-05	0	4.5894e-05	0.000229449	0.000252192	6.89957e-05	0.00018668	0.000696591	0	0.000168219	5.65771e-05	0.000121897
Candidatus_Endobugula	0.000145129	0	0	0.000366113	0.000163002	4.72605e-05	8.11293e-05	0.000390803	0.000323601	0.000656281	0	0.000448374	0.000188427	0	0.000174229	0.000127359	0.00012387	0.000480794	8.42176e-05	0	0.00016227	0.000257626	7.32225e-05	4.76485e-05	0	0	0	0.000145751	8.88462e-05	3.64003e-05	0.000199681	0.000112461	0.000182694	7.53381e-05	0	0.000295146	0.000177814	0.000125453	6.61434e-05	0.000413046	0.000542333	0.000453945	0.000206987	0.000560039	0.000303967	0.000187064	0	0	0.000216705
Roseibacterium	0	3.07286e-05	5.49919e-05	8.7867e-05	0.000195602	9.45209e-05	0.000121694	0.000390803	0.000431468	0.00021876	0	0.000140117	7.85114e-05	9.67867e-05	0	5.09437e-05	0.000148644	0.000480794	4.21088e-05	0.000519713	4.05674e-05	5.15251e-05	0	0	2.88459e-05	2.81021e-05	0.000110178	0.000104108	0.000213231	0.000133468	0	0	0.000156595	9.41726e-05	0.000135526	6.81106e-05	0.000152412	0.000412201	9.92151e-05	0.000183576	0	0.000141227	0.00016099	0.00012924	0.000202645	0	0.000181159	0.000325318	0.000135441
Rahnella	3.22508e-05	0	0	0.000131801	0.000130401	0	4.05647e-05	0.000108556	0	0	6.18888e-05	0	3.14046e-05	0.000129049	0	0	0	0	0	0	0	0	7.32225e-05	0.000142946	0	2.81021e-05	0	6.24649e-05	0	2.42668e-05	0.00017472	3.74869e-05	5.21982e-05	0	0.000150584	0.000158925	0	0.000161296	5.51195e-05	0	0	0	4.59971e-05	2.872e-05	0.000151983	0	7.76398e-05	0	0.000338602
Xanthomonas	0.000145129	7.68214e-05	5.49919e-05	2.9289e-05	0	0	6.0847e-05	0.000130268	2.39705e-05	0	0	0.000140117	0.000455366	3.22622e-05	2.90381e-05	0	4.95479e-05	5.06098e-05	0.000126326	0.000412186	6.76123e-05	0	0	4.76485e-05	0	9.83574e-05	0.0002479	0	3.55385e-05	0.000121334	0	0.000299895	0	0	0.00085833	9.08141e-05	0	0.000250905	6.61434e-05	0	0	0	0	0	5.06611e-05	0	0.000168219	0.00019802	0.000135441
Coccinimonas	0	0	0	0	6.52007e-05	9.45209e-05	0.000121694	0	5.99262e-05	0	0	0	0	3.22622e-05	2.90381e-05	0	0	5.06098e-05	4.21088e-05	0	0	0	0	0	0	0	0	0.00012493	0	0	4.99201e-05	0	7.82973e-05	0	0	0	0	0	0	0	0	0	0	5.74399e-05	2.53306e-05	0	0	0	0
Sphingomicrobium	6.45016e-05	0	0.000109984	0	0	0	4.05647e-05	8.68451e-05	0	0	0	0	4.71069e-05	0	0	0	0	0	0	0.000250896	0	0	0	0	2.88459e-05	0	6.8861e-05	0	5.33077e-05	6.06671e-05	0	7.49738e-05	0	0	0.000271052	0.000136221	5.0804e-05	5.37654e-05	0.000143311	0	0	0	0	0	2.53306e-05	0	0.000414079	0.000254597	0.000176073
Sandaracinus	0.000193505	0	0.00148478	0	0	0	4.05647e-05	0	0	0	0	0.00169541	6.28091e-05	3.22622e-05	0	0	0.00012387	0.000253049	0.000294762	3.58423e-05	0.000189315	0.000850165	0	0	0	0	0	0	0.000142154	8.49339e-05	4.99201e-05	0	0	0.000150676	0	0.000272442	5.0804e-05	0.000179218	0.000154335	0	0	0	0	0	0	0	0	0	0
Syntrophobacteraceae_Group	8.0627e-05	3.07286e-05	0.000329951	0.000117156	3.26004e-05	0.000236302	0.000223106	6.51339e-05	0	6.25029e-05	9.28333e-05	0.000476397	0.000423962	0	0	0.000534909	0.000148644	0.000126525	0.000273707	0.000232975	0.000405674	0.00113355	0.0009763	7.14728e-05	1.92306e-05	8.43064e-05	0	0.000562184	0.000142154	0.000303335	0.000923522	0.000412356	9.13468e-05	7.53381e-05	0.000210818	0.00102166	0.000101608	0.000537654	0.000661434	3.0596e-05	0.000521474	0	0	0	0	0	6.46998e-05	0	0
Ignisphaera	0	0	0	0.000497913	3.26004e-05	9.45209e-05	4.05647e-05	8.68451e-05	3.59557e-05	0	9.28333e-05	0	0	0.00014518	4.35572e-05	5.09437e-05	0	0.000126525	0.000126326	3.58423e-05	6.76123e-05	0	0	0.000452661	0	0	0	0	0	2.42668e-05	4.99201e-05	0.00193057	2.60991e-05	0	0.00171666	0.000113518	0.000101608	0	9.92151e-05	3.0596e-05	0	0	0	2.872e-05	0.000139318	0	0	0	0
Dactylosporangium	0.000241881	0	0.000219968	0	0	0	6.0847e-05	0	0	0	0	2.80234e-05	7.85114e-05	0	2.90381e-05	0	7.43218e-05	0.00010122	0.000168435	0.000483871	8.11348e-05	0.000154575	0	0.000262067	0	5.62042e-05	5.50888e-05	0	0.000319846	8.49339e-05	0	0.000581047	0	3.7669e-05	0.000271052	0	0.000228618	0.000250905	0.000264574	0	0	0	0	0	0	0	0	0	0
Nitrobacteria	0.000193505	0	8.24878e-05	2.9289e-05	0	0	0	4.34226e-05	0	0	0	9.80818e-05	0.000125618	0	0	0	0.00012387	0	0.000105272	0.000232975	2.70449e-05	7.72877e-05	0	0	0	0	0	0	7.1077e-05	4.85337e-05	0	9.37172e-05	0	0	9.03506e-05	0	5.0804e-05	0.000143374	0.000165358	0	0	0	0	0	0	0	0.000258799	0.000438472	0.000230249
OM60_Group	0.000661141	0.00010755	0	8.7867e-05	0	0.000173288	8.11293e-05	0.00017369	5.99262e-05	0.000359392	0	0.000798666	0.000439664	0.00043554	2.90381e-05	0	0.000966184	0.000202439	0.000126326	0.000215054	0.00010818	0.000386439	4.8815e-05	4.76485e-05	1.92306e-05	0.000168613	0.00012395	0	0.000142154	6.06671e-05	0.000998403	9.37172e-05	3.91486e-05	0.000282518	0.000120467	0.000431367	0	8.96089e-05	3.30717e-05	7.649e-05	0.000292026	3.0263e-05	0	0.0001436	2.53306e-05	0.000327363	0	0.000183876	0
Pusillimonas	0	0	0	0.000102512	0	0	0	0.000108556	4.79409e-05	4.68772e-05	0	0	0	3.22622e-05	0	0	0	0	0	0	0	0	4.8815e-05	0	0	0.000112408	0	0.000312324	0	0	0.00014976	0	0.000274041	0	0.000150584	0.000227035	0	0.000107531	0	0	0	0	0	0	0.000139318	0	0	0	0.000176073
Coprococcus	4.83762e-05	0	5.49919e-05	4.39335e-05	4.89006e-05	3.1507e-05	0	0	0	0	0	2.80234e-05	3.14046e-05	3.22622e-05	0.000101633	0	0	0	0.000252653	0	0	5.15251e-05	0	0	0.000298074	0	8.26332e-05	0	0.000337616	3.64003e-05	0	0	0	0	0	0.000227035	0.00012701	7.16872e-05	0	0	0.000125154	4.03506e-05	0	4.30799e-05	0.000126653	0.000233831	0.000245859	0.000438472	0
Streptobacillus	0	0	0	0	0	0	0	0	0	3.12515e-05	0	0	0	0	0	0	0	0	0	0	0	0	0	0	4.80765e-05	0	0	0	3.55385e-05	0	0	0	0	0	0	0	0	0	0	0	0	0	0	0	0	0	0	0	0
Bacteriovoracaceae_Group	6.45016e-05	0	5.49919e-05	0	0	0	0.000141976	4.34226e-05	0	0	0	0	6.28091e-05	0	0	0	0	0	0	0.000107527	2.70449e-05	0	0.000146445	4.76485e-05	0	0	0	4.16432e-05	0	9.70674e-05	0	3.74869e-05	2.60991e-05	0.000131842	7.52921e-05	0	5.0804e-05	3.58436e-05	0.000187406	0	8.34359e-05	0	0	7.17999e-05	0	0.000187064	0	2.82885e-05	0
Clostridium	4.83762e-05	7.68214e-05	0.000192472	5.8578e-05	3.26004e-05	6.3014e-05	4.05647e-05	0	0	0	0.000309444	0.000154129	0	0	0.000101633	0.000203775	4.95479e-05	0	0.000231598	0.000286738	0.00010818	0.000180338	0.00019526	0.000214418	1.92306e-05	0.000224817	0	0.000249859	7.1077e-05	7.28005e-05	7.48802e-05	0.000281152	9.13468e-05	0	0.00108421	0.000136221	0	0.000143374	6.61434e-05	0	4.17179e-05	0	0	0	0.000303967	0	0.000168219	0.000268741	2.70882e-05
Acanthopleuribacter	0.000306382	0	0.000357447	0	0	0	0.000243388	0	0	0	6.18888e-05	0.000196164	7.85114e-05	0	0	0	0.000222965	0	0.00018949	0	0.000311017	0.000128813	0	0.00126269	0	0	0	4.16432e-05	0	0.000728005	0	0.00303644	0	0.000131842	0.00141549	0	5.0804e-05	0.000770637	0.000793721	0	0	0	0	0	0	0	0	0	0
Constrictibacter	8.0627e-05	3.07286e-05	5.49919e-05	0	0	0	6.0847e-05	6.51339e-05	0	0	0	0	0	0	0	0	0	0	0	3.58423e-05	4.05674e-05	0	4.8815e-05	9.52971e-05	0	8.43064e-05	0	8.32865e-05	0	0	7.48802e-05	0.000243665	0	0	0.000391519	0.000136221	5.0804e-05	7.16872e-05	0.000121263	4.5894e-05	0	6.0526e-05	0	0	0	0	0	0	2.70882e-05
Candidatus_Korarchaeum	8.0627e-05	4.60929e-05	0	2.9289e-05	0	0	0	0	0	0	0	7.00584e-05	6.28091e-05	0	4.35572e-05	5.09437e-05	0	7.59148e-05	0.000168435	8.96057e-05	5.40899e-05	5.15251e-05	0	4.76485e-05	0	0	0	6.24649e-05	0	6.06671e-05	0.00017472	0.000131204	0	5.65036e-05	0.000165643	4.54071e-05	0	3.58436e-05	0.000165358	0	0	0	0	0	5.06611e-05	0	3.88199e-05	0	0
Pacificibacter	0	3.07286e-05	0	2.9289e-05	3.26004e-05	0.000472605	0.000101412	4.34226e-05	0	0.00010938	6.18888e-05	2.80234e-05	0.000125618	3.22622e-05	7.25953e-05	0	0	0	0	0.000215054	2.70449e-05	7.72877e-05	0	0	2.88459e-05	0	6.8861e-05	4.16432e-05	0.000142154	4.85337e-05	0	0	0	0	9.03506e-05	0	5.0804e-05	0.000161296	4.40956e-05	0.000107086	0	8.07013e-05	4.59971e-05	0.0002154	0.000139318	0	7.76398e-05	8.48656e-05	6.77204e-05
Marichromatium	0.000112878	0	0.000109984	2.9289e-05	0	0	4.05647e-05	0	2.39705e-05	0	0	0.00016814	0.000266939	0	7.25953e-05	0	9.90958e-05	0.00010122	0.000168435	0.000179211	8.11348e-05	5.15251e-05	0.000122038	0	0	0	0.000413166	0	7.1077e-05	9.70674e-05	0.0001248	0.000131204	0	7.53381e-05	6.02337e-05	0.000113518	7.6206e-05	5.37654e-05	0.000121263	0	4.17179e-05	0	0	0	0	0	0	0	0
Nonlabens	3.22508e-05	3.07286e-05	0.00013748	0	0	0.000220549	4.05647e-05	0.00049936	0	0	0	2.80234e-05	0.000172725	0	5.80762e-05	5.09437e-05	0	0	8.42176e-05	0.000143369	9.46573e-05	5.15251e-05	0	0	3.84612e-05	0	6.8861e-05	0	0.000959539	6.06671e-05	9.98403e-05	0.000168691	6.52477e-05	0	3.01169e-05	0.000454071	0.000330226	7.16872e-05	8.81912e-05	3.0596e-05	0	2.01753e-05	0	0	0	9.35322e-05	0	0	0
Diplazium	0	0	0	0	0	0	0	0.000651339	0	0	0	0	0	0	0	0	0	0	0	0	0	0	0	0.000547958	0	0	0	0	0	0	0	0	0	0	0	0	0	0	0	0	6.25769e-05	0	0	0	0	0	0	0	0
Rivibacter	0	0	0	0	0	0	0	0	0	0	0	0	0	0	0	0	0	0	0	3.58423e-05	0	0	0	0	0	0	0	0	0	0	0	0	0	0	3.01169e-05	0	0	0	0	0	0.000146013	0	0	0	0	0	0	0	0
Rhodobacter	0.000129003	0.000138279	0.000302455	0.000190379	0.000130401	0.000346577	0.000162259	0.000390803	8.38966e-05	0.000171883	9.28333e-05	0.00025221	0.000408259	6.45245e-05	8.71143e-05	5.09437e-05	4.95479e-05	7.59148e-05	0.000168435	0.00141577	0.000148747	0.000154575	4.8815e-05	0.00016677	0.000124999	0.000309123	0.0002479	0.00012493	0.000870693	0.000157734	4.99201e-05	0.000374869	0.000169644	0	0.000436694	9.08141e-05	0.000101608	0.00103946	0.000429932	0.000107086	0.000458897	0.000322805	0.00135691	0.00020104	0.000468615	9.35322e-05	0.000763458	0.00096181	0.000920997
BS11_Group	6.45016e-05	7.68214e-05	5.49919e-05	2.9289e-05	8.15009e-05	0.000267809	0.000121694	8.68451e-05	8.38966e-05	0	0	7.00584e-05	0.000141321	6.45245e-05	0.000116152	0	9.90958e-05	5.06098e-05	8.42176e-05	7.16846e-05	2.70449e-05	5.15251e-05	0	0	0.000124999	0.00012646	0.000289216	0	5.33077e-05	4.85337e-05	0	0	5.21982e-05	0	0	0	0	3.58436e-05	6.61434e-05	7.649e-05	0	0.000100877	0.000137991	0	3.79958e-05	0	0	4.24328e-05	0.000108353
Ralstonia	0	0	0	0	0	0	0	0	0	0	0	2.80234e-05	3.14046e-05	0	0	0	0	0	0	0	0	0	0	0	0	0	0	0	0	0	0	0	0	3.7669e-05	0	0	0	0	0	0	0.000646628	0	0	0	0	0	0	0	0
Seonamhaeicola	3.22508e-05	0	0	0	6.52007e-05	3.1507e-05	4.05647e-05	6.51339e-05	7.19114e-05	0	0	5.60467e-05	6.28091e-05	4.83933e-05	4.35572e-05	0	0	0	8.42176e-05	0	0	0	0	0	4.80765e-05	2.81021e-05	0.000151494	4.16432e-05	5.33077e-05	6.06671e-05	0	3.74869e-05	2.60991e-05	0	0	0.000113518	5.0804e-05	0	5.51195e-05	0	0	0	4.59971e-05	0	2.53306e-05	0	0	2.82885e-05	6.77204e-05
Halorhodospira	0.000145129	0	0.000192472	0	3.26004e-05	0	0	0.00017369	0	3.12515e-05	0	0.000210175	0.000439664	3.22622e-05	0.000101633	0	7.43218e-05	0.00010122	0.000231598	0.000322581	0.000148747	0.000515251	0	0.000142946	0	0	0.00037185	0	0	4.85337e-05	7.48802e-05	0.000224921	2.60991e-05	7.53381e-05	0.000135526	0.000272442	0.00012701	0.00030467	0.000121263	0	0	0	0	0.00015796	0	0	0	0	0
Reichenbachiella	0.000387009	0	5.49919e-05	0	0	0	0	0	0	0	0	0	0	0	0	0	4.95479e-05	0	0.000168435	0	2.70449e-05	0	0	0	0	0	2.75444e-05	0	7.1077e-05	0	0	0	0	0.000113007	0	0	0.000228618	0	0	3.0596e-05	4.17179e-05	0	0	0	0	9.35322e-05	0	0	0
Candidatus_Aciduliprofundum	4.83762e-05	0	0.000247463	0	0	0	0	0	0	0	0	0	0	0	0	0.000356606	7.43218e-05	5.06098e-05	8.42176e-05	5.37634e-05	0.000202837	0.000283388	0.00029289	0.000309716	0	0	0	8.32865e-05	0	0.000169868	0.00014976	0	9.13468e-05	9.41726e-05	3.01169e-05	6.81106e-05	0.000152412	0.000161296	0.000110239	6.1192e-05	8.34359e-05	0	0	0	0	0	0	0	0
Litoribacillus	4.83762e-05	0	0	0	0	0	0	0	0	0	0	0	6.28091e-05	3.22622e-05	0	0	4.95479e-05	0	0	0	0	0	0	0	0	0	0	0	0	0	9.98403e-05	0	0	0	6.02337e-05	0	0	0	0	0	0.00039632	2.01753e-05	0	0	0.000126653	0	0	0	2.70882e-05
Escherichia	8.0627e-05	0	0	0.00016109	8.15009e-05	0	6.0847e-05	6.51339e-05	2.39705e-05	0	0.000123778	0	4.71069e-05	0.00029036	0	0	7.43218e-05	5.06098e-05	0	0	0	5.15251e-05	7.32225e-05	0.000190594	0	0	0	6.24649e-05	0	2.42668e-05	0.000199681	7.49738e-05	3.91486e-05	0	4.51753e-05	0.000204332	0	8.96089e-05	9.92151e-05	3.0596e-05	0.000146013	0.000242104	4.59971e-05	2.872e-05	0.00024064	0.000327363	2.58799e-05	5.65771e-05	0.000379234
Pyrodictiaceae_Group	3.22508e-05	0	0	5.8578e-05	0	3.1507e-05	0	0	0.000143823	9.37544e-05	0.0002785	0.000112093	4.71069e-05	3.22622e-05	0.000116152	0	0	5.06098e-05	0	0	9.46573e-05	0.000128813	4.8815e-05	0.000119121	3.84612e-05	0	0	4.16432e-05	0	7.28005e-05	9.98403e-05	0.000524816	0	0	0.00028611	0.000249739	5.0804e-05	5.37654e-05	0.000143311	0	4.17179e-05	0	0	0	6.33264e-05	0	2.58799e-05	2.82885e-05	0
Thermomonas	0.000290257	6.14571e-05	0.000357447	0.00112763	0	3.1507e-05	4.05647e-05	0.00017369	0	0	0	0.00033628	0.00111486	0	0.000246824	0	0.000222965	0	0.00018949	0.000537634	0.000121702	0	0	0.000119121	1.92306e-05	2.81021e-05	0.00101914	0	0.000106615	0.000339736	0	0.000374869	0	0	0.000225876	0	0.00012701	0.000250905	0.000264574	0	0	0	0	0	0.000101322	0	0.00011646	0.000113154	8.12645e-05
Maricaulis	0	0	0	0.000102512	0.000146702	7.87674e-05	4.05647e-05	0	9.58819e-05	3.12515e-05	0	4.20351e-05	6.28091e-05	4.83933e-05	0	5.09437e-05	0	0	0	0	2.70449e-05	0	4.8815e-05	0	0	0	0	0.000333146	0	2.42668e-05	0.000199681	0	6.52477e-05	3.7669e-05	0	0.00031785	0	0	2.20478e-05	3.0596e-05	6.25769e-05	0	0	0	0.000113988	0	3.88199e-05	0	0
PW3	6.45016e-05	0	0.00013748	0	0	7.87674e-05	0	6.51339e-05	2.39705e-05	4.68772e-05	0	0	0	0	5.80762e-05	0.000101887	0.000148644	0.000126525	0.000252653	7.16846e-05	0.000175792	0.000128813	4.8815e-05	0.000142946	9.61529e-05	0	0.000151494	0	8.88462e-05	0.000242668	0	7.49738e-05	3.91486e-05	9.41726e-05	0.000135526	0	7.6206e-05	0.000215061	6.61434e-05	0	0.000146013	2.01753e-05	6.89957e-05	4.30799e-05	2.53306e-05	9.35322e-05	0	0	0.000108353
Kaistobacter	0.000435386	3.07286e-05	0.000549919	0.00016109	8.15009e-05	0.000110274	0.000182541	0.000325669	7.19114e-05	0.000171883	0.000154722	0.000462386	0.000251237	3.22622e-05	5.80762e-05	0	0.000198192	5.06098e-05	0.000147381	0.0012724	0.000297494	0	0	0.000190594	0	0.000112408	0.000179039	0	3.55385e-05	0.000242668	4.99201e-05	0.00101215	7.82973e-05	0	0.000933622	0.000113518	0.000152412	0.000931933	0.000760649	0	0	0	0.000114993	0	3.79958e-05	0	0.00133282	0.00114569	0.000704292
Solibacteraceae_Group	0	0.000122914	0	0	0	0	0	0	0	0	0	0.00025221	0	0	0	7.64156e-05	0	0	4.21088e-05	0.000107527	0	0	0	0	0	0.000168613	0	0	0.000106615	0	0	0.000131204	0	0	0.000963739	0.000181628	0	0.000125453	6.61434e-05	0	0	0	0	0	0	0	0	0	0
JTB38_Group	0.000290257	0	0.000522423	0	0	6.3014e-05	0.000121694	4.34226e-05	0	0	0	0.000126105	0	0	0	0.000611325	0.000520253	0.000328964	0.000568469	0.000519713	0.000148747	0.000412201	0.000439335	0.000142946	2.88459e-05	7.02553e-05	2.75444e-05	8.32865e-05	0.000408693	0.000194135	0.00017472	0.000281152	0.000221842	0.000433194	0.000391519	0.000953549	0.000330226	0.000268827	0.000407884	4.5894e-05	0.000166872	0	0	0	0	0	7.76398e-05	5.65771e-05	2.70882e-05
Candidatus_Hepatincola	0	3.07286e-05	0	0	0	0	0	0	0	0	0	0	3.14046e-05	0	0	0	0	0	4.21088e-05	0	0	0	4.8815e-05	0	0	0	0	0	0	0	0	0	0	0	9.03506e-05	9.08141e-05	0	0	6.61434e-05	3.0596e-05	0.000229449	0	9.19942e-05	0.0001436	3.79958e-05	0.000140298	0	0	0
R4_45B_Group	0	0	0	0	0	0	0	0	0	0	0	0	0	0	0	0	0	0	0	0	0	0	0	0	0	0	0	0	0	0	0	0	0	0	0	0	0	0	0	0	0	0	0	0	0	0	0	0	0
Hyphomicrobiaceae_Group	0.000612765	0	0.000412439	0	6.52007e-05	6.3014e-05	0.000141976	0.000108556	2.39705e-05	0.00010938	0	0.000280234	0.000141321	0.000225836	2.90381e-05	0.000203775	0.000322061	0.00010122	0.000779013	0.000645161	0.000338062	0.000154575	0.000146445	0.00033354	1.92306e-05	0.000351277	0	0.000229038	0.000390923	0.000412536	0.000399361	0.000637277	0.000130495	0.000169511	0.000511987	0.00077192	0.000330226	0.000663106	0.000407884	0	4.17179e-05	2.01753e-05	0	0	8.8657e-05	0	0.0001294	7.07214e-05	4.06322e-05
Methylomonas	0	0	0	0	0	0	0	0	0	3.12515e-05	0	0	0	0	0	0	0	0	0	0	0	0	0	0	0	0	0	0	0	0	0	0	0	0	6.02337e-05	0	0	3.58436e-05	7.71673e-05	0	0	0	0	0	0	0	0	0	0
Glaucocystis	9.67523e-05	0	0	8.7867e-05	0	3.1507e-05	4.05647e-05	0	0	0.00010938	0	0.000294245	0	3.22622e-05	0.000116152	0	0.000148644	0	0.000168435	0	0	0.000231863	0	0	8.65376e-05	0	0	6.24649e-05	3.55385e-05	7.28005e-05	0.000249601	5.62303e-05	5.21982e-05	3.7669e-05	0	0.000431367	0	3.58436e-05	0.000165358	6.1192e-05	0.000521474	0	0	0	0	0	2.58799e-05	2.82885e-05	0
Cryobacterium	0	0	0	2.9289e-05	8.15009e-05	6.3014e-05	0.00113581	0.00017369	2.39705e-05	7.81287e-05	0	0.00246606	0.000706603	0	0	0	0	0	0	0.000483871	0	0	0	0	0	0	0	0	0	2.42668e-05	0	0	0	0	0	0	0	0.000107531	2.20478e-05	0	4.17179e-05	0	0	0	0	0	0	0	0
Hwanghaeicola	0	0	0	0	0	0	0	0	0	0	0	0	0	0	0	0	0	7.59148e-05	0	0	0	0	0	0	0	2.81021e-05	0	0	0	0	0	0	0	0	0	0	0.000101608	0	2.20478e-05	6.1192e-05	0	0.000272367	9.19942e-05	8.61599e-05	2.53306e-05	0	0	0	0.000121897
JdFBGBact_Group	6.45016e-05	6.14571e-05	0.000109984	0	0	0.000708907	4.05647e-05	8.68451e-05	0	0	0	5.60467e-05	3.14046e-05	0	0	7.64156e-05	4.95479e-05	0	0.000168435	8.96057e-05	9.46573e-05	5.15251e-05	0	0	1.92306e-05	0	0	4.16432e-05	0.000284308	8.49339e-05	4.99201e-05	3.74869e-05	7.82973e-05	3.7669e-05	0.000150584	0	7.6206e-05	0.000107531	0.000176382	0	0	0	0	0	0	0	0	4.24328e-05	0
Aminobacterium	0	0.000153643	0	0	0	0.000110274	0.000162259	8.68451e-05	0	0	0	4.20351e-05	7.85114e-05	0	0.000101633	0	4.95479e-05	0	0	0.000250896	0	0	0	0	0	0.000379379	0.000220355	0	0	0	0	0.000149948	0	0	4.51753e-05	0	0	3.58436e-05	0	0	0	0	0	4.30799e-05	0	0	0	0	0
Aminobacter	6.45016e-05	0.000138279	0.000164976	0	0	0	0.000162259	0.000260535	0	0	0	5.60467e-05	3.14046e-05	0.000112918	0	0	7.43218e-05	0	4.21088e-05	0.000913978	8.11348e-05	0	0	0	1.92306e-05	0.000140511	2.75444e-05	0	0	8.49339e-05	0	0.000243665	0	0	0.000496928	0	0	0.000555575	0.000297645	0	0.000104295	0	4.59971e-05	0	7.59917e-05	0	7.76398e-05	0	5.41763e-05
Dethiosulfatibacter	0.000241881	0.000169007	0.000109984	0	0	0	0	0	0	0	0	0	3.14046e-05	0	0	0	7.43218e-05	7.59148e-05	0.000231598	8.96057e-05	9.46573e-05	7.72877e-05	0	0	0	0	0	0	3.55385e-05	0.000327602	0	0	0	0	0	0	0.000177814	3.58436e-05	0.00025355	0	0	0	0	0	2.53306e-05	0	0	5.65771e-05	5.41763e-05
Pedomicrobium	9.67523e-05	0.00010755	0.000109984	0	0	0	0	0	0	0	0.000185667	4.20351e-05	6.28091e-05	0.000112918	0	0	0	0	0	0.000179211	8.11348e-05	0	7.32225e-05	0.000142946	0	0.000140511	0	0	0	0.000145601	0.000249601	0.000224921	2.60991e-05	5.65036e-05	0.000828213	0.000158925	0.000152412	0.000125453	0.000363789	0	0	0	0	0	0	0	0	0	0
Arctic95B_10_Group	0.000112878	0	0	0	0	0	0	0	0	3.12515e-05	0	0	0	0	0	0.000356606	0.000173418	0	0	0	0.000270449	0.000437964	0.000341705	0.000571783	0	2.81021e-05	0	0.000353968	0.000106615	0.000169868	0.000274561	5.62303e-05	0	0.000169511	0	0	0.000787462	0	4.40956e-05	0	0	0	0	0	0	0	0	0	0
Dehalococcoidaceae_Group	0	3.07286e-05	0.000109984	0	0	0	0	0	0	0	0	2.80234e-05	4.71069e-05	0	0	0.000178303	0	7.59148e-05	0	5.37634e-05	0.000419196	0.000154575	0.000439335	0.000190594	0	0	0	8.32865e-05	0	6.06671e-05	0.000349441	0	7.82973e-05	0	0.000135526	9.08141e-05	7.6206e-05	0.000179218	0.000121263	0	8.34359e-05	0	0	0	0	0	0	0	0
Exiguobacteraceae_Group	0	0	0	0	0	0	0	0	0	0	0	0	0	0	0	0	0	0	0	0.000107527	0	0	0	0	0	0	0	0	0	0	0	0	0	0	0	0	0	0	2.20478e-05	0	0	0	0	0	0	0	0	0	0
Marivita	0.000290257	0.000199736	8.24878e-05	0	0	0.000472605	0.000141976	0.000390803	0	9.37544e-05	0.000154722	0.000210175	0.000125618	0.000209704	0.000116152	0	7.43218e-05	0.00010122	4.21088e-05	0.00109319	0.000243404	5.15251e-05	0	0	0.000201921	0.000295072	0.000234128	0	0.000195462	0.000121334	4.99201e-05	0.000356125	0	3.7669e-05	3.01169e-05	0.000272442	7.6206e-05	0.000627263	0.000418908	0.000122384	0.000146013	0.000282455	0.00016099	8.61599e-05	0.000443285	9.35322e-05	0.000815217	0.00114569	0.000568851
Oceanimonas	8.0627e-05	4.60929e-05	0	5.8578e-05	0.000114101	3.1507e-05	0	0	0.000191764	3.12515e-05	0.000123778	9.80818e-05	4.71069e-05	0.000177442	0.000145191	5.09437e-05	0	0.00015183	8.42176e-05	0	4.05674e-05	7.72877e-05	0	7.14728e-05	0.000317305	2.81021e-05	0.000110178	0	3.55385e-05	4.85337e-05	0.000299521	0	0.000117446	3.7669e-05	3.01169e-05	0.000113518	0	0	2.20478e-05	0.000137682	0.000584051	9.0789e-05	0.000114993	8.61599e-05	0.000113988	0.000280597	0	0	9.48086e-05
Sabulilitoribacter	3.22508e-05	0.00010755	5.49919e-05	2.9289e-05	0	6.3014e-05	8.11293e-05	4.34226e-05	2.39705e-05	0	0	0	0.000157023	0	0.000130672	0	0	0	0.000168435	0.00016129	0	0	0	0	0	8.43064e-05	0.000454483	0	8.88462e-05	3.64003e-05	0	0.000112461	2.60991e-05	0	7.52921e-05	0	0.00012701	7.16872e-05	0.000143311	6.1192e-05	0	0	0.000137991	2.872e-05	0.000113988	9.35322e-05	0	0	6.77204e-05
Carsonella	0	0	0	8.7867e-05	3.26004e-05	0	0	0	0	7.81287e-05	0.000123778	7.00584e-05	0	0	0	0	0	0	4.21088e-05	3.58423e-05	2.70449e-05	0.00010305	4.8815e-05	0	0	4.21532e-05	0	0	0	0	0.00017472	0	0	0	3.01169e-05	0.000590292	0	0	0	6.1192e-05	0.000271167	0	0	0	0.000253306	0	0	0	4.06322e-05
Zoogloea	0	3.07286e-05	0	0.000424691	0	3.1507e-05	0	0	0	0	0	2.80234e-05	4.71069e-05	3.22622e-05	0	0	0	0	0	0	0	5.15251e-05	0	0	0	5.62042e-05	0	0	0	0	0	0	0	0	6.02337e-05	4.54071e-05	0	0	0	0	0	0	0	0	0	0	0	0	2.70882e-05
Rathayibacter	0	6.14571e-05	0.000109984	0	0	0	0.000202823	6.51339e-05	2.39705e-05	0	0	9.80818e-05	3.14046e-05	0	0	0	7.43218e-05	7.59148e-05	0.000105272	0.000286738	8.11348e-05	0	0	0	0	5.62042e-05	0	0	7.1077e-05	7.28005e-05	0	0.000262408	0	0	0.000180701	0.000136221	0	0.000250905	2.20478e-05	0	0	0	0	0	2.53306e-05	0	2.58799e-05	0.000367751	2.70882e-05
Chlorochromatium	0	9.21857e-05	5.49919e-05	0.00029289	0	0	0	0.000651339	0	0	0	0.000140117	6.28091e-05	0	0	0	0	0	4.21088e-05	0.000537634	2.70449e-05	0.000257626	0.000122038	4.76485e-05	0	0.000140511	0	0	3.55385e-05	7.28005e-05	0.000274561	0.000112461	0	0	0.000406578	0.00070381	0	0.000788559	8.81912e-05	3.0596e-05	0.000312885	2.01753e-05	9.19942e-05	0	0.000113988	0	0.000181159	0.000212164	0.000162529
Nitriliruptor	0	0	0	4.39335e-05	0	0	8.11293e-05	0.000521071	0	0	0	2.80234e-05	0	0	0	5.09437e-05	0	0	4.21088e-05	0.000573477	0	0	0	0	1.92306e-05	0	0	0	3.55385e-05	0	0	3.74869e-05	0	0	3.01169e-05	0	0	0.000286749	5.51195e-05	0	0	0	0	0	3.79958e-05	0	5.17598e-05	0.000127298	0
Liberibacter	4.83762e-05	4.60929e-05	0.000192472	2.9289e-05	0	0	0	6.51339e-05	0	0	0	4.20351e-05	3.14046e-05	0	0	5.09437e-05	9.90958e-05	0	0	3.58423e-05	2.70449e-05	5.15251e-05	4.8815e-05	0	1.92306e-05	0	4.13166e-05	0.000104108	7.1077e-05	2.42668e-05	0.00014976	9.37172e-05	7.82973e-05	3.7669e-05	7.52921e-05	0.000158925	5.0804e-05	0.000125453	0.000176382	0	0	0	0	2.872e-05	0	0	5.17598e-05	8.48656e-05	0
Oleiphilaceae_Group	0.000145129	0	0	0	0	0	0	0	0	0	0	9.80818e-05	0	0.000241967	0	0	4.95479e-05	0	6.31632e-05	0	0	0.000180338	0.000122038	4.76485e-05	1.92306e-05	0	0	0	3.55385e-05	0	0.000648962	0	3.91486e-05	3.7669e-05	0	0.000431367	0	0	0	7.649e-05	0.000229449	2.01753e-05	6.89957e-05	0	0	0	0	0	0
Wolbachia	0	0	5.49919e-05	0	0	3.1507e-05	0	0	0	3.12515e-05	0	2.80234e-05	3.14046e-05	0.000306491	0	0	0	5.06098e-05	0	0	0	0.000180338	0	4.76485e-05	7.69223e-05	0	0	0	0	0	0	0	5.21982e-05	0	0.000105409	0.000590292	0	0	0	3.0596e-05	0.000479756	0	0	5.74399e-05	0.000468615	0	0	0	2.70882e-05
Luteibacter	3.22508e-05	0	0.00013748	0	0	0	0	0	0	0	0	0.000154129	0.000408259	0	0	0	4.95479e-05	0	0.000147381	0.000143369	6.76123e-05	7.72877e-05	0	0	0	8.43064e-05	0.000151494	0	5.33077e-05	4.85337e-05	0	9.37172e-05	0	0	0.000180701	0	0	0.000125453	0	0	0	0	0	0	0	0	6.46998e-05	0	4.06322e-05
A4b_Group	0.000193505	6.14571e-05	0.000274959	2.9289e-05	0	0	0	0	0	0	0	5.60467e-05	0.000125618	0	2.90381e-05	0.000152831	0.00012387	0	0.000210544	0.000143369	0.000500331	0.000386439	0.000366113	0.000142946	0	8.43064e-05	2.75444e-05	0.000333146	0.000142154	0.000351869	0.0001248	0.000318638	5.21982e-05	3.7669e-05	0.000436694	0.000340553	0	0.000161296	0.000220478	0	0.000146013	0	0	0	0	0	2.58799e-05	2.82885e-05	0
Magnetospirillum	4.83762e-05	9.21857e-05	5.49919e-05	0	0.000146702	0	0.00026367	4.34226e-05	8.38966e-05	7.81287e-05	0.000216611	4.20351e-05	3.14046e-05	0.000112918	7.25953e-05	0.000305662	0	0.00010122	0	0.000125448	2.70449e-05	0	9.763e-05	0.000262067	2.88459e-05	0	0	0.000333146	0	0.000157734	0.000324481	0.000337382	0.000456734	5.65036e-05	0.000451753	0.000249739	0	8.96089e-05	2.20478e-05	6.1192e-05	0	4.03506e-05	0	4.30799e-05	2.53306e-05	0.000140298	0	0	8.12645e-05
Silene	0	0	0	4.39335e-05	0	0	4.05647e-05	0	5.99262e-05	0.000125006	0	2.80234e-05	0	0	0	7.64156e-05	0	0	0	5.37634e-05	0	0	4.8815e-05	0	0	0	0	4.16432e-05	0	0	7.48802e-05	0	0	0	0	0.000567588	0	0	0	0	0	0	0	0	0.000227975	0	0	0	0
ND137	6.45016e-05	0	0	8.7867e-05	0.000163002	7.87674e-05	8.11293e-05	6.51339e-05	0.000203749	0.000125006	0	0.000280234	0.000109916	0	0.000116152	0	0	0.000227744	6.31632e-05	0	0.000121702	0.000180338	4.8815e-05	4.76485e-05	1.92306e-05	0	0	6.24649e-05	0.000159923	0	9.98403e-05	0	3.91486e-05	3.7669e-05	0	0	7.6206e-05	0	2.20478e-05	0.000290662	8.34359e-05	0.000211841	9.19942e-05	0.000402079	0.000151983	9.35322e-05	5.17598e-05	4.24328e-05	0.000162529
Planktotalea	0	0.000399471	0	0.000790803	0.000211902	0.000803428	0.0003448	0.000369092	0.000515365	0.00101567	0.00102117	0.000280234	0.000518175	0.00043554	0.000145191	0	0	0.000354269	4.21088e-05	0.00046595	2.70449e-05	0.000231863	0	0	0.000182691	0.000562042	8.26332e-05	0.000208216	0.000337616	3.64003e-05	0	3.74869e-05	0.000247941	7.53381e-05	0.000105409	9.08141e-05	0	0.000215061	7.71673e-05	0.000596622	4.17179e-05	0.000655698	9.19942e-05	0.00022976	0.000658595	0.000467661	0.000258799	8.48656e-05	0.000595939
Sutterella	0	0	0	0.000234312	0	0	0	0	0	3.12515e-05	0	0	0	0.000258098	0.00114701	0	0	0	0.00168435	3.58423e-05	0	5.15251e-05	4.8815e-05	0	0	0	2.75444e-05	0	0.000177692	0	0.000224641	0	0	0	9.03506e-05	0.000567588	0	0	0	0	4.17179e-05	0	9.19942e-05	2.872e-05	0.000151983	0	0.00015528	4.24328e-05	0.000121897
Catalinimonas	0	0	0	2.9289e-05	0	0	0	0	0	0	0	0	0	3.22622e-05	0	0	0	0	0	0	0	0	0	0	0	0	0	0	0	0	0	0	0	0	0	0	0	0	0	0	0	0	0	0	2.53306e-05	0	0	0	0
Gangjinia	0	0	0	2.9289e-05	0	0	0	0	0	0	0	0	0	0	0	0	0	0	0	0	0	0	0	0	0	0	0	0	5.33077e-05	0	0	0	0	0	0	0	0	0	0	0	0	0	0	0	0	0	0	0	2.70882e-05
Flexithrix	0.000161254	0	0	0.000117156	0	0	8.11293e-05	8.68451e-05	0	0	0	0	3.14046e-05	0	4.35572e-05	0	0	0	0	0	2.70449e-05	0	0	0	0	0	2.75444e-05	0	0.000106615	2.42668e-05	0	3.74869e-05	0	0	0	0	0.000101608	0.000107531	0	0	0.000104295	0	0	4.30799e-05	0	0	0	0	0
Wandonia	0.000112878	0	5.49919e-05	0	0	0	6.0847e-05	0	2.39705e-05	0	0	2.80234e-05	4.71069e-05	4.83933e-05	0	0	0	0	0.000126326	0	0	0	0	0	0	0	0	0	0.000142154	3.64003e-05	0	0	0	0	0	4.54071e-05	0	0	0	0	4.17179e-05	0	0	2.872e-05	0	0	0	0	2.70882e-05
Caminicella	0	3.07286e-05	0	0	0.000260803	0	0	0	0	0	0	0.000182152	0	0	0	0.000713212	0	0	0.00018949	0	0	0	0	0	0	0	0	0.000812043	0	0	4.99201e-05	5.62303e-05	0.000613329	0	0.000542103	0	0	0	0	0	0	0	0	0	0	0	3.88199e-05	0	0
Pelagibius	0.000354759	0.000138279	0.000247463	0	0	0	0.000466494	0.000108556	0	4.68772e-05	0.000123778	5.60467e-05	0.000235534	4.83933e-05	7.25953e-05	0	4.95479e-05	0	0.000168435	0.000215054	0.000121702	0.000309151	0	0.000285891	0	0.000112408	0	4.16432e-05	0	0.000643071	4.99201e-05	0.000468586	2.60991e-05	0.000150676	0.000421636	0.000340553	0.000177814	0.000143374	0.000407884	0	0	0	0	0	0.000189979	0	0.000232919	5.65771e-05	4.06322e-05
Methanocalculus	0	0	0	0	0	0	0	0	0	0	6.18888e-05	0	0	0	2.90381e-05	0	0	0	0	0	0	0	0	0	0	0	0	0	0	0	0	0.000449843	0	0	0.000255993	0	0	0	0	0	0	0	0	0	0	0	0	0	0
Meridianimaribacter	9.67523e-05	0.000261193	0	0	0	0.000267809	4.05647e-05	4.34226e-05	3.59557e-05	3.12515e-05	0	0.000182152	0.000157023	6.45245e-05	7.25953e-05	0	4.95479e-05	0	0	3.58423e-05	2.70449e-05	0	0	0	7.69223e-05	0.000224817	6.8861e-05	4.16432e-05	0.000106615	4.85337e-05	0	0	2.60991e-05	0	0	4.54071e-05	0.000101608	7.16872e-05	3.30717e-05	3.0596e-05	0.000166872	9.0789e-05	0.000597962	8.61599e-05	3.79958e-05	0.000187064	0	0	0.000108353
Algicola	0	0	0	0	8.15009e-05	0	6.0847e-05	6.51339e-05	2.39705e-05	4.68772e-05	6.18888e-05	2.80234e-05	0	0	0	0	0	5.06098e-05	0	0	0	0	0	0.00016677	0	0	0	8.32865e-05	0	0	0	9.37172e-05	0	0	0.000105409	0	0	3.58436e-05	3.30717e-05	0	0	6.0526e-05	0	8.61599e-05	6.33264e-05	0	0	0	0
Hyperthermus	0	0	0	2.9289e-05	3.26004e-05	0	0	0	3.59557e-05	0	9.28333e-05	0	3.14046e-05	4.83933e-05	2.90381e-05	0	0	0	0	0	2.70449e-05	0	0	0	0	0	0	0	0	2.42668e-05	0	0.000449843	0	0	0.00028611	9.08141e-05	0	0	3.30717e-05	0	0	0	0	0	0	0	2.58799e-05	0	0
Pyrodictium	0	0	0	0	0	0	0	0	0	0	9.28333e-05	0	3.14046e-05	0	0	0	0	0	4.21088e-05	0	0	0	0	0.000142946	0	0	0	0	0	3.64003e-05	0	0.000449843	0	0	0.000271052	0	0	0	2.20478e-05	0	0	0	0	0	2.53306e-05	0	0	0	0
Leadbetterella	0	0	0.000164976	0.000234312	0	6.3014e-05	8.11293e-05	0.00108556	0	0	0	7.00584e-05	7.85114e-05	0	2.90381e-05	0.000101887	4.95479e-05	0	0	0.00177419	9.46573e-05	0	7.32225e-05	0	0	2.81021e-05	0	6.24649e-05	3.55385e-05	0.000364003	0	3.74869e-05	2.60991e-05	0	7.52921e-05	0	0	0.00109323	0.000187406	0	0	6.0526e-05	0	5.74399e-05	2.53306e-05	0.000140298	0	2.82885e-05	5.41763e-05
TMEG_Group	0	0	0	0.000307535	0	0	0	0	0	0	0	0	0	3.22622e-05	0	0.000127359	0	0	0	0	0	0	0	0	0	0	0	0	0	0	7.48802e-05	0.000449843	0	0	0.000150584	4.54071e-05	0	0.000107531	3.30717e-05	0	0.000375462	0	0	0	5.06611e-05	0	0	0	2.70882e-05
Polyangium	0.000193505	0.00010755	5.49919e-05	0	0	0	4.05647e-05	0	0	4.68772e-05	0	2.80234e-05	3.14046e-05	3.22622e-05	0	0	0.00012387	0	6.31632e-05	0.000197133	0	0	0	0	0	0.000168613	0	0	5.33077e-05	3.64003e-05	0	7.49738e-05	0	7.53381e-05	0.000361402	0	7.6206e-05	0.000107531	5.51195e-05	0	0.000166872	0	0	0	0	0	3.88199e-05	0	2.70882e-05
Photobacterium	0	0	0	0.000102512	3.26004e-05	0	4.05647e-05	0.000108556	0.00025169	0.00010938	0.000154722	2.80234e-05	0	0	2.90381e-05	0.0008151	0	5.06098e-05	0	0	0.000513854	7.72877e-05	7.32225e-05	0	8.65376e-05	0	8.26332e-05	0.000270681	0	2.42668e-05	0.00014976	0	0.000221842	3.7669e-05	0	4.54071e-05	0	0	0	3.0596e-05	4.17179e-05	4.03506e-05	4.59971e-05	7.17999e-05	0.000202645	0.000187064	0	0	0.000108353
Leucobacter	0	3.07286e-05	0.000109984	0.000117156	6.52007e-05	3.1507e-05	0.000182541	0	2.39705e-05	0	9.28333e-05	0.000392327	0.000298343	0	0	0	0	5.06098e-05	0	0.000232975	0	0	0	7.14728e-05	0	9.83574e-05	0	0	0	4.85337e-05	4.99201e-05	0.000168691	0	0	0.000105409	6.81106e-05	0	0.000250905	2.20478e-05	0	0	0	0	0	3.79958e-05	0	0	0.000127298	4.06322e-05
Streptomyces	9.67523e-05	7.68214e-05	5.49919e-05	0	0	7.87674e-05	0.000527341	0	0	0	0	0.000756631	0.00020413	0	2.90381e-05	0	9.90958e-05	0	0.00033687	0.000304659	4.05674e-05	0.00010305	0	9.52971e-05	0	9.83574e-05	6.8861e-05	0	0.000248769	3.64003e-05	0	0.000206178	0	0	0.000150584	0	5.0804e-05	0.000125453	0.000187406	0	0	0	0	0	2.53306e-05	0	2.58799e-05	2.82885e-05	0
Dietzia	0	0.000307286	0	0	0	3.1507e-05	8.11293e-05	0	0	0	6.18888e-05	0	3.14046e-05	0	0	0	0	0	0.000252653	0.000519713	5.40899e-05	0	0	0.000142946	0.000105768	0.000449634	0	0	0.000675231	2.42668e-05	0	0.00149948	0	3.7669e-05	0.000798097	0	0	0.000537654	0.000110239	0.000183576	0.0008135	0	0.000942941	7.17999e-05	0.000620599	0.000233831	0.000828157	0.000579915	0
ntu14_Group	0.000112878	3.07286e-05	0.000219968	0	0	0	0.000141976	0	0	0	0	9.80818e-05	0.000251237	0	2.90381e-05	0.000331134	0.000198192	7.59148e-05	0.000757959	0.000125448	0.000189315	0.000437964	0.000561373	0.000142946	0	0	0	0.000145751	0.000408693	0.000254802	0.000399361	3.74869e-05	0	0.00020718	9.03506e-05	0	0.000177814	3.58436e-05	0.000209454	0	0	0	0	0	0	0	0	0	0
Pelagicoccus	0	0	5.49919e-05	0	0	0.000598633	0	0	0	0	0	0	0	0.000225836	8.71143e-05	0	0	0	0	0	0	0	0.000122038	0	0	0	0	0	0	6.06671e-05	0	0	0	0.000113007	0	0	7.6206e-05	0	0	0	0	0	0	0	0	0	0	0	0
Methylobacterium	0.000129003	0	0.00013748	0.000117156	0	0.000236302	8.11293e-05	0.000108556	0	0	0	4.20351e-05	0	4.83933e-05	0	5.09437e-05	0	0	0	0.000268817	0.00010818	5.15251e-05	0	0.00104827	0	0	2.75444e-05	0	5.33077e-05	0	0	0.000206178	2.60991e-05	3.7669e-05	0.000210818	4.54071e-05	0.000228618	0.000179218	0.000540171	9.1788e-05	4.17179e-05	0	0.000137991	0	2.53306e-05	0.000420895	0.000258799	0.000254597	0.000216705
Bauldia	0.000290257	0.000291921	0.000412439	0	4.89006e-05	3.1507e-05	4.05647e-05	6.51339e-05	0	0	0	0.000406339	0.00020413	0.000193573	5.80762e-05	5.09437e-05	0	0	0.000210544	0.000197133	0.000121702	0	0.000146445	0.000119121	0	0.000196715	0	0.000353968	0.000621924	0.000133468	0.000274561	0.00054356	0.000208793	0	0.00127997	0.000454071	5.0804e-05	0.00030467	0.000220478	3.0596e-05	0	3.0263e-05	0	0	0	0	7.76398e-05	0.000169731	0
Gaiellaceae_Group	0	0	0	0	0	9.45209e-05	0	0	0	0	0	4.20351e-05	6.28091e-05	0	0	5.09437e-05	0.000148644	0	0	0.000519713	0	0.000154575	0.000146445	0.000428837	0	0	0	6.24649e-05	0.000373154	0.000194135	4.99201e-05	0.000805968	0	0	0	0	0.000177814	0.000143374	8.81912e-05	0	0	0	0	0	0	0	0	0	0
S24_7_Group	3.22508e-05	0	5.49919e-05	2.9289e-05	4.89006e-05	0	0	4.34226e-05	0	0	0	0.000182152	3.14046e-05	0	8.71143e-05	0	0	5.06098e-05	4.21088e-05	0	6.76123e-05	0	0	0	0	0	0	4.16432e-05	0.000106615	4.85337e-05	0	7.49738e-05	2.60991e-05	0	0.000135526	0	5.0804e-05	3.58436e-05	2.20478e-05	0	0	0	0	0	0	0.000187064	2.58799e-05	2.82885e-05	5.41763e-05
DA101	0	0	5.49919e-05	2.9289e-05	3.26004e-05	0.000173288	6.0847e-05	4.34226e-05	2.39705e-05	7.81287e-05	0	7.00584e-05	6.28091e-05	0	0	0	0	0	0	0	0	0	0	0	0	5.62042e-05	0	0.000229038	5.33077e-05	0	0.000249601	3.74869e-05	0.000117446	3.7669e-05	0	0.000590292	0	3.58436e-05	0	0	0	2.01753e-05	4.59971e-05	0	0	0	3.88199e-05	0	0
Rhodocyclaceae_Group	0	7.68214e-05	0	0.000512558	8.15009e-05	0.000141781	4.05647e-05	0.000347381	0	3.12515e-05	6.18888e-05	0.00016814	0.000172725	0.00029036	0	0.000127359	0	0	0	0.00046595	4.05674e-05	5.15251e-05	0.000170853	4.76485e-05	0	0	0	4.16432e-05	0	3.64003e-05	0.000998403	9.37172e-05	5.21982e-05	0	0.000240935	0.00161195	5.0804e-05	0.000430123	2.20478e-05	3.0596e-05	0.000438038	0	0	0	2.53306e-05	0	2.58799e-05	4.24328e-05	2.70882e-05
Lachnospiraceae_Group	6.45016e-05	0	0	0	0	0.00036233	0	0	0	0	0	2.80234e-05	3.14046e-05	3.22622e-05	2.90381e-05	0	0.00012387	0.00010122	6.31632e-05	0.000179211	0	7.72877e-05	0	0	0	2.81021e-05	0	0.00012493	0.000106615	2.42668e-05	0	3.74869e-05	0	0	0.000120467	6.81106e-05	0	0	0	0	4.17179e-05	0	0	0	0.00448351	9.35322e-05	0.0057971	0.00632249	5.41763e-05
Treubia	3.22508e-05	0	8.24878e-05	7.32225e-05	9.78011e-05	7.87674e-05	6.0847e-05	8.68451e-05	7.19114e-05	0.00010938	0.000711722	0.000140117	0.000219832	0	0	0	0	0	6.31632e-05	0	0	0	0	0	0	0	0	0	0	6.06671e-05	0	0	0	0	0	0	0	0	0	6.1192e-05	0	0	0	0	0.000101322	0	0	4.24328e-05	2.70882e-05
Bosea	0.000225755	0	5.49919e-05	0	0	7.87674e-05	0	8.68451e-05	0	0	0	0.000112093	4.71069e-05	0	0	0	0	5.06098e-05	0.000147381	0.000179211	2.70449e-05	0.000128813	0	9.52971e-05	0	0	0	4.16432e-05	0.000159923	0	0	0	0	3.7669e-05	0.000120467	0.000158925	7.6206e-05	0.000161296	6.61434e-05	0	0	3.0263e-05	4.59971e-05	2.872e-05	6.33264e-05	0	0.000181159	0.000212164	0.000108353
Pontirhabdus	0	0	0	0	0	0	4.05647e-05	6.51339e-05	0	0	0	0	0.000141321	0	2.90381e-05	0	0	0	6.31632e-05	5.37634e-05	0	0	0	0	2.88459e-05	0	5.50888e-05	0	7.1077e-05	0	0	3.74869e-05	0	3.7669e-05	0	0	0	3.58436e-05	6.61434e-05	6.1192e-05	0	6.0526e-05	6.89957e-05	2.872e-05	5.06611e-05	0	0	0	8.12645e-05
Marixanthomonas	0	0	0.000164976	0	0	3.1507e-05	0	6.51339e-05	0	0	0	0	0	0	5.80762e-05	0	0	0	0.000147381	0	0	7.72877e-05	0	0	1.92306e-05	0	8.26332e-05	4.16432e-05	0.00071077	6.06671e-05	7.48802e-05	0	2.60991e-05	0	0	0.000567588	0.000330226	3.58436e-05	4.40956e-05	4.5894e-05	0	0.000201753	0	4.30799e-05	2.53306e-05	0.000140298	0	0	6.77204e-05
Fimbriimonadaceae_Group	0	3.07286e-05	0	0	0	0	0	0	0	0	0	5.60467e-05	0	0	0	0	0	0	0	0	4.05674e-05	0	0	0	0.000221152	0	0	0	0.000106615	0	0	0	0	0	3.01169e-05	0	0	0.000143374	0	0	4.17179e-05	0	0	0	0	0	0	0	0
p_1088_a5	0	0.000122914	0	0	0	0	0	4.34226e-05	0	0	0	0	0	3.22622e-05	4.35572e-05	0	0	0	0	0	0	0	0	0	0	0.000323174	0	0	3.55385e-05	3.64003e-05	0	3.74869e-05	0	0	0	0	5.0804e-05	5.37654e-05	0	0	0	0	0	0	0	0	0	2.82885e-05	0
Blastopirellula	0.000451511	0.000291921	0.000989854	0	0	0.00214247	0.000283953	0	0	3.12515e-05	0	0.000602502	0.00054958	6.45245e-05	5.80762e-05	0.000127359	0.000148644	0.0010122	0.00138959	0.000896057	0.000283972	0.000437964	0.000219668	0.000595607	0.000855761	0.000379379	0	0	0.00094177	0.000388269	0.000199681	0.000449843	0	9.41726e-05	0.000707746	0	0.000457236	0.000376358	0.000496075	0	0	2.01753e-05	0	0	6.33264e-05	0	0.000401139	2.82885e-05	4.06322e-05
Pseudorhodoferax	0	0	0	8.7867e-05	0	0	0	0.00017369	0	0	0	0	0	0	0	0	0	0	0	0.000501792	0	0.000180338	4.8815e-05	0	0	0.000112408	0	0	0	9.70674e-05	0.000274561	9.37172e-05	0	0	0.000240935	0.000249739	0	0.000232983	0	0	4.17179e-05	0	0	0	6.33264e-05	0	9.05797e-05	0.000113154	0.000135441
Chryseoglobus	0.000225755	0	5.49919e-05	0	0	0	0	0	0	0	0	0	4.71069e-05	0	0	0	0	5.06098e-05	6.31632e-05	0.000179211	4.05674e-05	0	0	0	0	0.000112408	0	0	0.000124385	0	0	7.49738e-05	0	5.65036e-05	0.00048187	0	0	0.00019714	4.40956e-05	0	0	0	0	0	0	0	0.00010352	0	5.41763e-05
Parasphingopyxis	3.22508e-05	0	0.000164976	0	0	3.1507e-05	0	0	0	0	0	0	3.14046e-05	0	0	0	0	0	0	0.000197133	0	0	9.763e-05	7.14728e-05	0	0.00012646	2.75444e-05	8.32865e-05	0	4.85337e-05	4.99201e-05	7.49738e-05	6.52477e-05	0	0.000135526	0.000522181	0.000177814	0.000107531	0.000132287	0	0	0	0	0	3.79958e-05	0	0	7.07214e-05	2.70882e-05
Fusobacterium	0	0	0	0	0	3.1507e-05	0	0	0	0	0	0	0	0	0.000290381	0	0	0	0.000484251	0	0	0	0	0	0	0	0	0	0	0	0	0	0	0	0	0	0	0	0	0	0	0	0	0	0	0	0	0	0
Anaerovorax	0	0	0	0	0	0	0	0	7.19114e-05	0	9.28333e-05	0	3.14046e-05	0	0	0	0	0	0	3.58423e-05	0	0	0	0	0	2.81021e-05	0	0	0	0	0	0	0	0	6.02337e-05	0	0	0	0	6.1192e-05	0.000479756	0	0	0	0	0	2.58799e-05	0	0
Marinilabiaceae_Group	9.67523e-05	4.60929e-05	0	8.7867e-05	0	0	0	4.34226e-05	0	0	0	0	0	0	0	0	0	0	0	5.37634e-05	6.76123e-05	0	0	0	0	9.83574e-05	0	0.000104108	0	4.85337e-05	0	0	0.000130495	0	0.000331285	6.81106e-05	5.0804e-05	5.37654e-05	5.51195e-05	7.649e-05	0	6.0526e-05	4.59971e-05	2.872e-05	6.33264e-05	0	2.58799e-05	2.82885e-05	0
Koribacteraceae_Group	0	0	0	7.32225e-05	0	3.1507e-05	0	0	0	7.81287e-05	0.000773611	0.000140117	0.000172725	0	0	0	0	0	0	0	5.40899e-05	0	0	9.52971e-05	0	0	0	0	3.55385e-05	2.42668e-05	0	3.74869e-05	0	3.7669e-05	6.02337e-05	0	0	3.58436e-05	4.40956e-05	0	0	0	0	0	0	0	0	0	0
Martelella	8.0627e-05	9.21857e-05	0.000192472	0	0	4.72605e-05	6.0847e-05	0.00017369	2.39705e-05	0	0	0.000140117	0.000109916	8.06556e-05	0	7.64156e-05	4.95479e-05	0.00010122	0.00018949	0.000197133	0.000148747	0.000231863	9.763e-05	7.14728e-05	1.92306e-05	0.000182664	0	4.16432e-05	0.000319846	6.06671e-05	0	0.000318638	0	5.65036e-05	0.000376461	0.000158925	0.000177814	0.000125453	0.000187406	0	0	0	0	2.872e-05	5.06611e-05	0	0.000207039	0.00029703	0.000176073
Syntrichia	0	0	0	0.000131801	8.15009e-05	0	0	0	2.39705e-05	0.00010938	0.000185667	5.60467e-05	9.42137e-05	0	0	0	0	0	0	0	0	0	0	0	0	0	0	0	0	0	0	0	2.60991e-05	0	0	0	0	0	2.20478e-05	0	0	0	0	4.30799e-05	0.000278636	0	5.17598e-05	0	0
Vibrionaceae_Group	0	0	0	0	0	0	0	0	0	0	0.0002785	0	0	0	0.000101633	0	0	0	0	0	0	0	0	0	0	0	9.64055e-05	0	0	0	0	0	0	0	0	0	0	0	0	0	4.17179e-05	0	0	0	6.33264e-05	0	0	0	0
Thalassococcus	0	0	0	0	0	9.45209e-05	0	4.34226e-05	3.59557e-05	0	0	0	3.14046e-05	4.83933e-05	2.90381e-05	0	0	0	0	3.58423e-05	0	0	0	0	2.88459e-05	0	0	0	0	0	0	0	0	0	0	0	0	0	0	3.0596e-05	0	4.03506e-05	0	0	0	9.35322e-05	0	0	8.12645e-05
Dictyostelium	3.22508e-05	0	5.49919e-05	0	0	0	0	0	0	3.12515e-05	0	2.80234e-05	0	0	0	5.09437e-05	0	5.06098e-05	0	0	0	5.15251e-05	0	0	0	0	0	4.16432e-05	0	2.42668e-05	0.000549121	0	0	0	0	0.000136221	0	0	0	3.0596e-05	0.000104295	0	0	0	3.79958e-05	0	0	0	2.70882e-05
Pseudonocardiaceae_Group	0	9.21857e-05	0	0	0	0	0.000141976	0	0	0	0	0	0	0	0.000130672	0	0	0	0	0.000107527	0	0	0	0	0	0.000309123	0.000192811	0	0	0	0	3.74869e-05	2.60991e-05	0	3.01169e-05	0	0	7.16872e-05	0	0	0	0	0	0	0	0	0	0	0
Roseicyclus	0	3.07286e-05	0.000109984	2.9289e-05	3.26004e-05	9.45209e-05	0	0.000325669	0	3.12515e-05	0	4.20351e-05	0	0	7.25953e-05	0	0	0	4.21088e-05	0.000663082	2.70449e-05	0	0	0	1.92306e-05	2.81021e-05	6.8861e-05	0	3.55385e-05	0	0	0	0	0	3.01169e-05	0	0	0.000215061	0.000121263	4.5894e-05	0	4.03506e-05	4.59971e-05	0.0002872	0.000253306	0	0.000181159	0.000155587	5.41763e-05
Azospira	0	0	0	0.000205023	0	0	0	0	0	6.25029e-05	0	0	0	0	0	0	0	0	0	0	0	0	0	0	0	0	0	0	0	0	0.0001248	0	0	0	6.02337e-05	0	0	0	0	7.649e-05	0	0	0	0	0	0	0	0	4.06322e-05
Aspromonas	0	4.60929e-05	0	0	0	0	0	0	0	0	0	2.80234e-05	0	0	0	0	4.95479e-05	0	0	0.000143369	0	0	0	9.52971e-05	1.92306e-05	0.000140511	0	0	0	0	4.99201e-05	0.000206178	0	0	0.000331285	0	5.0804e-05	0	0	0	0	0	0	0	2.53306e-05	0	2.58799e-05	0.00019802	0.000108353
Albidiferax	0	3.07286e-05	8.24878e-05	0.000205023	0	0	0	0.000217113	2.39705e-05	0	0	0	7.85114e-05	0	0	0	4.95479e-05	0	6.31632e-05	8.96057e-05	4.05674e-05	5.15251e-05	0	0	3.84612e-05	4.21532e-05	4.13166e-05	0	0	0.000109201	0	3.74869e-05	0	3.7669e-05	9.03506e-05	0	0.000203216	5.37654e-05	9.92151e-05	0	0	0	0	0	3.79958e-05	0	0.000284679	8.48656e-05	2.70882e-05
Micrococcaceae_Group	3.22508e-05	0	0	0	0	0	0	0	0	0	0	0.000112093	0.000141321	0	0	0	7.43218e-05	0	0.000252653	0	0	0.000206101	0	0	0	2.81021e-05	2.75444e-05	0	0.000177692	0	0	5.62303e-05	0	0	4.51753e-05	0	0	5.37654e-05	7.71673e-05	3.0596e-05	0	0	0	0	0	0	2.58799e-05	5.65771e-05	0
Leifsonia	0	0	5.49919e-05	0	0	3.1507e-05	0.000446211	0	0	0	6.18888e-05	0.000798666	0.000219832	0	0	0	0	0	0	0.000125448	0	0	0	0	0	0	0	0	0	3.64003e-05	0	0	0	0	0	4.54071e-05	0	0.000107531	3.30717e-05	0	0	0	0	0	0	0	2.58799e-05	0	0
Eubacterium	0	0	0	5.8578e-05	0	0	0	0	2.39705e-05	0	9.28333e-05	0.00016814	9.42137e-05	0	5.80762e-05	0	0	0	4.21088e-05	7.16846e-05	0	5.15251e-05	0	4.76485e-05	0	0	0	4.16432e-05	0	0	0.000948482	3.74869e-05	0	0	0.00105409	0.000204332	0	0	0	6.1192e-05	4.17179e-05	0	4.59971e-05	2.872e-05	3.79958e-05	0	9.05797e-05	0.000169731	0
Aquicella	0.000112878	6.14571e-05	5.49919e-05	0	6.52007e-05	7.87674e-05	0	0	0	7.81287e-05	0	0.000182152	6.28091e-05	0	0	0	0	7.59148e-05	0.00018949	0.000232975	0	0.00010305	0	0	1.92306e-05	0.000168613	0	4.16432e-05	0.000266539	2.42668e-05	4.99201e-05	9.37172e-05	0.000104396	0	0.00048187	0.000181628	0	3.58436e-05	0	0	0.000104295	0	0	0	2.53306e-05	9.35322e-05	0	5.65771e-05	0
Chelativorans	0.000225755	0	0.000192472	0	3.26004e-05	0	0	4.34226e-05	0	0	0	0.000126105	0	0.00014518	0	0	0	0	6.31632e-05	0.000394265	2.70449e-05	0	0	4.76485e-05	0	2.81021e-05	0	0	0.000213231	7.28005e-05	0.000274561	0.000299895	0	0	0.000301169	0.000726513	0	0.00019714	0.000264574	0	4.17179e-05	0	0	0	2.53306e-05	0	0	4.24328e-05	5.41763e-05
Estrella	0	0	0	0	0	0	0	0	0	0	0	0	0	0	0	0	0	0	0	0	0	0	0	4.76485e-05	0	4.21532e-05	0	0	0	0	0	0	0	0	3.01169e-05	0	0	0	0	0	0	0	0	0	0	0	0	0	0.00029797
Thermogemmatisporaceae_Group	0	0	0	0	0	7.87674e-05	0	0	0	0	0	4.20351e-05	0	0	0	0	0	0	0	0	0	5.15251e-05	0	0	0	0	0	0	0	0	4.99201e-05	0	0	0	0	0	0	0	0	0	0	0	0	0	0	0	0	0	0
Orientia	0	0	0	5.8578e-05	0	0.000614386	4.05647e-05	0	0	0	0.000495111	0	0.000109916	0	2.90381e-05	0	0	0	0	8.96057e-05	6.76123e-05	0	0	0	0	0	0	0	3.55385e-05	0	0	0	0	0	3.01169e-05	0	0	0	3.30717e-05	0	4.17179e-05	0	0	0	0	0.000187064	2.58799e-05	0	0
Leptothrix	0	0	0.000109984	0.000102512	0	3.1507e-05	4.05647e-05	8.68451e-05	0	3.12515e-05	0	5.60467e-05	7.85114e-05	0.000677507	0	0	0	0	4.21088e-05	5.37634e-05	2.70449e-05	0.00010305	0.000244075	7.14728e-05	0	0	2.75444e-05	0	0	3.64003e-05	0.000449281	0.000149948	0	0	0.00028611	0.00077192	0	3.58436e-05	5.51195e-05	0	0.000646628	4.03506e-05	9.19942e-05	0	5.06611e-05	0	2.58799e-05	5.65771e-05	5.41763e-05
Maribius	6.45016e-05	0.000122914	0	0.00016109	4.89006e-05	0.000173288	4.05647e-05	0.000130268	7.19114e-05	0.000203135	0.000402278	7.00584e-05	7.85114e-05	0.000112918	5.80762e-05	0	0	5.06098e-05	0	0.000340502	2.70449e-05	5.15251e-05	0	0.000119121	7.69223e-05	0.000140511	0.000110178	4.16432e-05	7.1077e-05	4.85337e-05	4.99201e-05	9.37172e-05	2.60991e-05	3.7669e-05	6.02337e-05	4.54071e-05	0	0.000125453	6.61434e-05	0.000107086	6.25769e-05	0.000211841	4.59971e-05	4.30799e-05	0.00024064	0	0.0001294	0.000212164	0.000257338
Nitritalea	0.000306382	0	5.49919e-05	5.8578e-05	0	6.3014e-05	4.05647e-05	0.000108556	2.39705e-05	0	0	0	0.000141321	0	0.000130672	0	9.90958e-05	7.59148e-05	0.000168435	3.58423e-05	8.11348e-05	0.00010305	0	0	1.92306e-05	0	5.50888e-05	0	0.000284308	2.42668e-05	0	7.49738e-05	2.60991e-05	7.53381e-05	0	0	0.000203216	5.37654e-05	5.51195e-05	3.0596e-05	0.000187731	2.01753e-05	0.000229986	2.872e-05	0.000151983	9.35322e-05	6.46998e-05	2.82885e-05	0.000135441
Azorhizobium	9.67523e-05	0	0	0	0	3.1507e-05	4.05647e-05	0	0	3.12515e-05	0	0	3.14046e-05	0	2.90381e-05	5.09437e-05	0	7.59148e-05	6.31632e-05	0.000143369	0	0	0	7.14728e-05	0	5.62042e-05	0	0	0	0	0	0.000149948	0	3.7669e-05	0.000361402	4.54071e-05	0	5.37654e-05	8.81912e-05	0	0	0	0	0	0	0	2.58799e-05	0	0
Anomodon	0	0	0	0.000175734	4.89006e-05	0.000141781	0.000162259	0	0.000107867	0.000156257	0.0002785	0.000280234	0.000251237	0	0	0	0	0	6.31632e-05	0	0	7.72877e-05	0	0	0	7.02553e-05	0	0	0	0	0	0	0	0	0	0	0	0	0	7.649e-05	0.000166872	0	0	0	0.000265971	0	5.17598e-05	0	0
Coriobacteriaceae_Group	0	0	0	0.000146445	0	0	4.05647e-05	0	0	0.000156257	0.00117589	0.000140117	0.000329748	0	0	0	0	0	0	0	0	0	0	0	0	0	0	0	0	0	0	0	0	0	0	0	0	0	0	0	0	0	0	0	0	0.000467661	3.88199e-05	0	0
Zeaxanthinibacter	0	0	0.000247463	0	0	0	0	8.68451e-05	0	0	0	0	3.14046e-05	0	5.80762e-05	0	0	0	4.21088e-05	0	2.70449e-05	5.15251e-05	0	9.52971e-05	0	0	0.000151494	8.32865e-05	0.000728539	9.70674e-05	4.99201e-05	9.37172e-05	0	0	4.51753e-05	0.00031785	0.000101608	0	5.51195e-05	3.0596e-05	0	2.01753e-05	0	2.872e-05	3.79958e-05	0.000467661	6.46998e-05	0	2.70882e-05
DS001	0	3.07286e-05	0	0	0	4.72605e-05	0.000121694	0	0	0	0	0.000294245	0.000188427	0	0	0	0	0	0	0	0	0	0	0	0	4.21532e-05	0	0	0	0	0	0	0	0	0	0	0	0	2.20478e-05	0	0	0	0	0	0	0	0	0	0
Streptococcus	0.000112878	0	0.000109984	8.7867e-05	0	6.3014e-05	0	6.51339e-05	0	0	0	0.000140117	0.000125618	0	0	0	0.00012387	0	0	0.000125448	0	5.15251e-05	0	4.76485e-05	0	0	8.26332e-05	0	0	0.000109201	4.99201e-05	0.000168691	0	0	0.000105409	0.000136221	0.000101608	5.37654e-05	9.92151e-05	4.5894e-05	0	5.04383e-05	0	0	8.8657e-05	0	0.000336439	0.000169731	4.06322e-05
Actibacterium	0.000112878	0.00010755	0	0.000102512	6.52007e-05	0.000141781	4.05647e-05	8.68451e-05	0.000143823	0.00010938	6.18888e-05	0.000112093	0.000157023	0	2.90381e-05	0	0	5.06098e-05	6.31632e-05	0.000125448	0	5.15251e-05	0	7.14728e-05	1.92306e-05	9.83574e-05	0	0	0.000319846	0.000121334	4.99201e-05	9.37172e-05	2.60991e-05	0	7.52921e-05	9.08141e-05	0.000101608	0.000107531	4.40956e-05	4.5894e-05	0.000104295	0.000100877	0	2.872e-05	0.000101322	9.35322e-05	5.17598e-05	2.82885e-05	2.70882e-05
Polymorphum	4.83762e-05	4.60929e-05	0.00013748	0	3.26004e-05	0	4.05647e-05	0	2.39705e-05	0	0	0.000112093	0.000125618	0	0	0.000152831	4.95479e-05	0	4.21088e-05	8.96057e-05	0	7.72877e-05	0	9.52971e-05	0	8.43064e-05	0	0.000104108	0.000106615	4.85337e-05	4.99201e-05	0.000187434	9.13468e-05	0	0.000316227	4.54071e-05	5.0804e-05	0.000179218	6.61434e-05	0	4.17179e-05	0	0	0	5.06611e-05	0.000187064	5.17598e-05	8.48656e-05	2.70882e-05
Smaragdicoccus	8.0627e-05	0	0	0	0	0	0	0	0	0	0	0.000112093	0.000109916	0	2.90381e-05	0	0	0	0.000252653	0.000107527	2.70449e-05	0.000180338	0	0	0	9.83574e-05	0	0	0.000159923	4.85337e-05	0	3.74869e-05	0	0	6.02337e-05	0	7.6206e-05	0	0.000165358	0	0	0	0	0	0	0	0	7.07214e-05	0
Rhodoferax	0	0	0	0.000234312	0	6.3014e-05	0	0.000282247	0	0	0	2.80234e-05	0	0	0	0	4.95479e-05	0	0	0.000501792	5.40899e-05	5.15251e-05	0	0	0	0	0	0	0	4.85337e-05	4.99201e-05	5.62303e-05	0	0	7.52921e-05	9.08141e-05	0	0.000340514	0	0	0.000312885	0	0	0	0	0	2.58799e-05	0	2.70882e-05
Anaerotruncus	0	0	0	0	0	0	0	0	0	0	0	0	0	0	0.000145191	0	0	0	0.000126326	0	8.11348e-05	0	0	0	0	0	0	0	0	0	0	0	0	0	0	0	5.0804e-05	0	0	0	0	0	0	0	7.59917e-05	0	0.000258799	0.000311174	0
Geosporobacter_Thermotalea	0	3.07286e-05	0	2.9289e-05	0.000228203	0	0	0	0	0	0.000216611	0.000140117	0	0	0	0.000356606	0	0	0.00018949	0.00016129	0	0	0	0	0	7.02553e-05	0	0.000458076	0	4.85337e-05	0	0	0.000352338	0	0.00111432	0	0	0.000107531	3.30717e-05	0	0	0	0	0	0	0	2.58799e-05	0	0
Shinella	0.000370884	0	0.00013748	0	0	0	0.000141976	0.000130268	0	0	0	0.000140117	0.000157023	9.67867e-05	0	0	9.90958e-05	0	0.000252653	0.000340502	2.70449e-05	0.000180338	0	0	1.92306e-05	2.81021e-05	9.64055e-05	0	0.000231	7.28005e-05	4.99201e-05	0.000468586	2.60991e-05	0	0.000165643	9.08141e-05	0	5.37654e-05	0.000231502	0	0	0	0	0	7.59917e-05	0	0.000323499	0.000183876	0.000230249
Endozoicomonas	0	0	0	0	4.89006e-05	0	0	8.68451e-05	0.000107867	7.81287e-05	0	7.00584e-05	0	0	2.90381e-05	0	0	0.00015183	0.000105272	0.000125448	6.76123e-05	0.00010305	0	0	3.84612e-05	2.81021e-05	2.75444e-05	4.16432e-05	0	0	0	0.000112461	2.60991e-05	3.7669e-05	3.01169e-05	4.54071e-05	0	0.000107531	6.61434e-05	6.1192e-05	0	5.04383e-05	0	7.17999e-05	6.33264e-05	0	0	0	2.70882e-05
Acidimicrobiaceae_Group	3.22508e-05	0	0.00013748	7.32225e-05	3.26004e-05	0	0	0	0	0	0	0	0	0	0	0.000280191	0	0.000126525	4.21088e-05	3.58423e-05	0.000270449	0.000180338	0.00019526	4.76485e-05	0	0	0	8.32865e-05	0.000106615	4.85337e-05	0	3.74869e-05	0	3.7669e-05	0	0	0.000279422	3.58436e-05	2.20478e-05	0	6.25769e-05	0	0	0	0	0	0	0	0
Thermoplasma	0.000112878	0	0	0	0	0	0	0	0	0	0	0	0	0	0	7.64156e-05	0	0	0	0	2.70449e-05	0	0	0	0	0	0	8.32865e-05	0	6.06671e-05	0	0	0	0	0	0	0	0	0	0	4.17179e-05	0	0	0	0	0	0	0	0
Methylococcaceae_Group	0	0	0	0	0	0	0	0	0	0	0	0	0	0	0	0	0	0	0	0	0	0	0	0	0	0	0	0	0	2.42668e-05	0	0	0	0	4.51753e-05	0	0	0.000161296	0.00045198	0	0	0	0	0	0	0	0	0	0
Umboniibacter	9.67523e-05	0	0	0	0	0	0	0	0	0	0	0.000126105	0	3.22622e-05	0	0	0	0	0	0	0	0	0	7.14728e-05	0	0	0	0	5.33077e-05	0	0	0	0	0	0	0	0	0	0	0	4.17179e-05	0	0	0	0	0	0	0	0
Methylobacillus	4.83762e-05	7.68214e-05	0	0.00029289	3.26004e-05	4.72605e-05	0.000101412	0.000151979	3.59557e-05	0.00010938	0.000185667	8.40701e-05	0.000172725	0.000177442	0.000203267	0	9.90958e-05	0.000253049	0.000105272	8.96057e-05	2.70449e-05	0	7.32225e-05	9.52971e-05	1.92306e-05	0.000281021	8.26332e-05	0	3.55385e-05	2.42668e-05	0	0.000112461	5.21982e-05	0.000150676	3.01169e-05	9.08141e-05	5.0804e-05	0.000107531	0	0.000107086	0.000104295	4.03506e-05	0.000137991	0	3.79958e-05	0	2.58799e-05	2.82885e-05	0.000203161
Roseivivax	3.22508e-05	3.07286e-05	0	8.7867e-05	0	0.000110274	0.000121694	0	0.000107867	4.68772e-05	0.000216611	0.00016814	0.000157023	0	0	0	0	0	8.42176e-05	7.16846e-05	0	0	0	0	1.92306e-05	0	5.50888e-05	0	0.000213231	0	0	3.74869e-05	6.52477e-05	0	7.52921e-05	0	0	3.58436e-05	0	0	0	0	0	0	0	0	2.58799e-05	0	0
Borrelia	0	0	0	0.000424691	0	0	8.11293e-05	6.51339e-05	0	0	0	0	0	0	0	0	0	0	0	3.58423e-05	0	0	0	4.76485e-05	0	0	0	0	0	0	0	3.74869e-05	0	0	0	0	0	0	0	0	0	0	0	0	0.000189979	0	0.0001294	0	0
Arenibacter	0	0	0	0	4.89006e-05	0.000252056	0.000243388	4.34226e-05	3.59557e-05	0	0	2.80234e-05	0	0	0	0	0	0	0	0.00016129	5.40899e-05	0	4.8815e-05	0	1.92306e-05	0.000196715	0.000220355	0.000187395	0.000106615	2.42668e-05	0	0.000224921	0.000130495	0	0.000406578	0.000363257	0	0.000232983	0.000121263	7.649e-05	0	2.01753e-05	4.59971e-05	7.17999e-05	0.00024064	0.000187064	0.000491718	0.000113154	0.00036569
Propionibacteriaceae_Group	0	0.000169007	0	5.8578e-05	0	3.1507e-05	0.000182541	4.34226e-05	0	0	0	2.80234e-05	7.85114e-05	0	0.000116152	0	0	0	0.000105272	0.000358423	0	0	0	0	0	0.000281021	0.00012395	0	0	0	0	3.74869e-05	0	0	0	0	0	0.000107531	4.40956e-05	0	0	0	0	0	0	0	0	2.82885e-05	0
Millisia	6.45016e-05	0	0	0	0	0	0	0	0	3.12515e-05	0	0.000182152	7.85114e-05	0	0	0	0	0	0.000252653	0.000125448	0	7.72877e-05	0	0	0	5.62042e-05	0	0	3.55385e-05	3.64003e-05	0	9.37172e-05	0	0	4.51753e-05	0	7.6206e-05	7.16872e-05	2.20478e-05	0	0	2.01753e-05	0	0	0	0	0	4.24328e-05	0
Lamprocystis	0	0	0	0	0	0	0	4.34226e-05	0	0	0	0	0	8.06556e-05	2.90381e-05	0	0	0.00010122	0	3.58423e-05	6.76123e-05	0	4.8815e-05	0	0	0	0	0	7.1077e-05	0	0	0	0	0.000113007	0	0	0.00012701	0	0	0	0	0	0	0	0	0	0	0	0
Coccinistipes	0.000225755	0	0	0	0	0	0	0	0	0	0	0.000126105	9.42137e-05	9.67867e-05	5.80762e-05	7.64156e-05	0	0	0.000105272	0	0	0	0	7.14728e-05	0	2.81021e-05	0	6.24649e-05	0.000159923	0	0	3.74869e-05	5.21982e-05	0	3.01169e-05	0.000181628	0	0	3.30717e-05	0	0	0	0	7.17999e-05	0	0.000187064	0	0	0
Rehaibacterium	9.67523e-05	0	0.00013748	0	0	0	0	8.68451e-05	4.79409e-05	0	0	0.000126105	0.000298343	0	4.35572e-05	0	0	7.59148e-05	0.000105272	0.000358423	0	0	0	4.76485e-05	1.92306e-05	2.81021e-05	0.0002479	0	5.33077e-05	8.49339e-05	0	0.000187434	0	3.7669e-05	0.000271052	0	0	0.000125453	5.51195e-05	0	0	0	0	0	0	0	3.88199e-05	5.65771e-05	4.06322e-05
Micromonosporaceae_Group	0.000112878	0	8.24878e-05	0	0	0	0.000101412	6.51339e-05	0	0	0	2.80234e-05	0	0	4.35572e-05	0	9.90958e-05	0	8.42176e-05	0.000358423	8.11348e-05	7.72877e-05	0	0	0	0	5.50888e-05	0	0.000248769	2.42668e-05	0	0.000374869	0	0	0.000165643	0	0	5.37654e-05	0.000176382	0	0	0	0	0	0	0	0	0	0
Bartonella	0	0	0.00013748	0	0	0	0.000101412	0	2.39705e-05	0	0	2.80234e-05	0	6.45245e-05	0	0	0	0	8.42176e-05	0.000179211	2.70449e-05	0	0	9.52971e-05	0	2.81021e-05	0	0	0	0	0	0.000149948	7.82973e-05	3.7669e-05	0.000120467	0.000136221	5.0804e-05	0.000161296	0.000132287	0	0	0	0	0	2.53306e-05	0	2.58799e-05	4.24328e-05	2.70882e-05
Acidiferrobacter	0.000322508	3.07286e-05	0.000109984	2.9289e-05	0	0	0	0	0	0	0	0	0	8.06556e-05	0	5.09437e-05	0.000198192	0	4.21088e-05	0	6.76123e-05	0	0	9.52971e-05	0	0	0	0	0	2.42668e-05	0.000199681	3.74869e-05	2.60991e-05	5.65036e-05	0	0.000249739	0	0	0.000110239	0	0	0	0	0	2.53306e-05	0	2.58799e-05	0	5.41763e-05
Piscirickettsia	0	4.60929e-05	0	0	0.000130401	4.72605e-05	6.0847e-05	0	9.58819e-05	0	0	0	0	0	0	0	0	0.000227744	0	0	0	0	0	4.76485e-05	0	0	0	4.16432e-05	7.1077e-05	3.64003e-05	4.99201e-05	0	0.000143545	5.65036e-05	3.01169e-05	6.81106e-05	0	5.37654e-05	2.20478e-05	3.0596e-05	0.000146013	0	6.89957e-05	4.30799e-05	0	0	0	0	0
Candidatus_Ruthia	4.83762e-05	0	0.000109984	0	0	0	0	0	0	0	0	0	0	0	0	0	0	0	0	0	0	0	0	0	0	0	0	0	0	0	0	0	0	0	0	0	0	8.96089e-05	0.000154335	0	0.00020859	0	0	0	0	0	0	0	0
Variovorax	0	0.000184371	0	0.00190379	0.000130401	7.87674e-05	4.05647e-05	0.000325669	0.000119852	0.000203135	0.000185667	0.000112093	0.00020413	0.000403278	2.90381e-05	0	0	0	0.000147381	0.000537634	0	0.00010305	9.763e-05	4.76485e-05	2.88459e-05	0.000379379	2.75444e-05	0	3.55385e-05	8.49339e-05	0.000299521	9.37172e-05	0.000117446	5.65036e-05	0.000421636	0.00077192	0.000101608	0.000340514	0.000154335	4.5894e-05	4.17179e-05	3.0263e-05	0.000206987	4.30799e-05	0.000227975	0	0.000245859	7.07214e-05	0.000148985
Methanoculleus	0	0	0	0	0	4.72605e-05	0	4.34226e-05	0	0	0.0002785	0	0	3.22622e-05	2.90381e-05	0	0	0	0	0	0	5.15251e-05	4.8815e-05	4.76485e-05	0	0	0	4.16432e-05	0	0	0	0.000749738	0	0	0.000752921	0	5.0804e-05	0	6.61434e-05	0	0	0	0	0	2.53306e-05	0	0	0	0
Hellea	0	6.14571e-05	5.49919e-05	0.00016109	9.78011e-05	0.000535619	8.11293e-05	0	5.99262e-05	7.81287e-05	0	0.000210175	0.000157023	6.45245e-05	2.90381e-05	0	0	0	0	5.37634e-05	2.70449e-05	7.72877e-05	4.8815e-05	4.76485e-05	1.92306e-05	7.02553e-05	0	8.32865e-05	7.1077e-05	0	0	7.49738e-05	0	0	7.52921e-05	9.08141e-05	0	7.16872e-05	2.20478e-05	6.1192e-05	4.17179e-05	9.0789e-05	0	7.17999e-05	0.000139318	0	5.17598e-05	5.65771e-05	2.70882e-05
Puniceibacterium	0	7.68214e-05	0	8.7867e-05	0	7.87674e-05	0.000101412	6.51339e-05	0	0.000125006	0	5.60467e-05	6.28091e-05	0	0	0	0	0	0	0	0	0	0	0	0	0.000140511	0	0	5.33077e-05	0	0	0	0	7.53381e-05	0	0	0	0	0	0.000107086	0	0.000100877	0	0	0.000177314	0	0	0	4.06322e-05
Heterosigma	0	0	0	0.000278246	3.26004e-05	3.1507e-05	0.000324517	0	0	3.12515e-05	0	0	4.71069e-05	0	4.35572e-05	0	7.43218e-05	0	6.31632e-05	0	0	5.15251e-05	0	4.76485e-05	0	7.02553e-05	0	0	0	2.42668e-05	0	3.74869e-05	0	0	0	9.08141e-05	7.6206e-05	3.58436e-05	0	0	0.000229449	0	4.59971e-05	0	8.8657e-05	0	0	0	8.12645e-05
Tateyamaria	0	0.000399471	0	0.000175734	3.26004e-05	0.000456851	0	0.000108556	8.38966e-05	3.12515e-05	0.00102117	7.00584e-05	0.000376855	0.000306491	0.0003049	0	0	5.06098e-05	0.000294762	0.000537634	2.70449e-05	5.15251e-05	0	0	0.000182691	0.000379379	6.8861e-05	4.16432e-05	0.000444231	3.64003e-05	0	3.74869e-05	2.60991e-05	0.000169511	3.01169e-05	0	5.0804e-05	8.96089e-05	9.92151e-05	0.000290662	0	0.000554821	0.000137991	0.00020104	0.000443285	0.000420895	0.000336439	0.000113154	0.000352146
Pasteurella	0	0	0	0	0	3.1507e-05	8.11293e-05	0	0	6.25029e-05	0	0	0	0	0	0.000101887	0	0	4.21088e-05	0	0	0	0	0	1.92306e-05	0	0	0	0	0	0	0	3.91486e-05	3.7669e-05	0	6.81106e-05	0	0	0	0.000137682	8.34359e-05	0.000504383	4.59971e-05	5.74399e-05	8.8657e-05	0.000467661	0	0	0
Granulosicoccus	3.22508e-05	4.60929e-05	5.49919e-05	0	0.000440105	0.000945209	0	0.000434226	0.000107867	7.81287e-05	0.000247555	0.000238199	0.000219832	6.45245e-05	7.25953e-05	5.09437e-05	4.95479e-05	0.00015183	8.42176e-05	0.000179211	0	0.00010305	4.8815e-05	0.00016677	0	0.000140511	4.13166e-05	6.24649e-05	3.55385e-05	0.000121334	0.00017472	0	0.000208793	0	4.51753e-05	0.000204332	0.000101608	0.000232983	0.000121263	3.0596e-05	6.25769e-05	0	0	0.00018668	2.53306e-05	9.35322e-05	5.17598e-05	5.65771e-05	0
Saccharospirillum	0.000161254	0	0	2.9289e-05	0	3.1507e-05	0	0	0	0	0	0	0	0	0	0	0.000148644	0	4.21088e-05	5.37634e-05	0	5.15251e-05	0	4.76485e-05	0	0	0	0	0	0	0	0	0	0	0	0	0	0	0	0	0	0	0	0	0	0	0	0	0
Amphritea	3.22508e-05	0	5.49919e-05	2.9289e-05	3.26004e-05	7.87674e-05	4.05647e-05	6.51339e-05	0.000227719	6.25029e-05	0	0.000140117	4.71069e-05	0	0	0	0	0.00010122	4.21088e-05	0	2.70449e-05	5.15251e-05	0	0	1.92306e-05	0	0	4.16432e-05	0	0	0.00014976	0	2.60991e-05	0	0	6.81106e-05	0	0	0	7.649e-05	8.34359e-05	0.00013114	4.59971e-05	5.74399e-05	2.53306e-05	0	0	4.24328e-05	0
Halomonadaceae_Group	0	0	0	0	0	0	0	0	0	4.68772e-05	0	2.80234e-05	0	0	0	0	0	0	0	0	0	0.000360676	0	7.14728e-05	0	4.21532e-05	0	4.16432e-05	3.55385e-05	0	0	0	0	0	0	4.54071e-05	0	3.58436e-05	0	0	0	0	0	2.872e-05	0	0	0	0	0
Ellin6075_Group	3.22508e-05	0.0002151	0.000109984	0	0	0	0	0	0	0	6.18888e-05	0.000350292	0.000172725	0	0	0	0	0	0	0.000250896	0	0	4.8815e-05	0	0	0.000154562	0	0	0	2.42668e-05	0	9.37172e-05	0	0	0.000361402	0	0	0	2.20478e-05	0	0	0	0	0	0	0	5.17598e-05	0	0
Paracocccus	0	3.07286e-05	0	0	0	0	0	0	0	0	0	0	0	0.000112918	0	0	4.95479e-05	0	4.21088e-05	0.000107527	0	0	4.8815e-05	4.76485e-05	0	0	0	0	0	0	0	3.74869e-05	0	7.53381e-05	0	0	0	7.16872e-05	2.20478e-05	0	0	0	0	0	8.8657e-05	0	0.000168219	0	2.70882e-05
Persicirhabdus	0	0	0	0	0	0.000882195	0	0	0	0	0	0.000322269	0	0	0	0	0	0	0	3.58423e-05	9.46573e-05	0	4.8815e-05	0	0	0	0	0	0	0	0	0	0	0	0	0	0	0	0	0	0	0	0	0	0	0	3.88199e-05	2.82885e-05	0
Cupriavidus	0	0	0	0	0	0.00207946	0	0	0	0	0	0	0	6.45245e-05	0	0	0	0	0	0	0	0	0	0	0	0	0	0	0	0	0	0	0	0	0	0.000158925	0	0	2.20478e-05	0	0.000146013	4.03506e-05	0	0	2.53306e-05	0	0	0	2.70882e-05
Pir4	0.000112878	6.14571e-05	0.000164976	0	3.26004e-05	0.000110274	0.000162259	0	0	3.12515e-05	0	0.00033628	7.85114e-05	0	2.90381e-05	7.64156e-05	0.000173418	0	0.00113694	0.00102151	0.000202837	0.000309151	0.000122038	0.000262067	0	0.00012646	0	4.16432e-05	0.00071077	0.000182001	9.98403e-05	0.00155571	0.000104396	0.000244849	0.000376461	0.000113518	0.00038103	0.000412201	0.00039686	0	0	0	0	0	0	0	5.17598e-05	0	0
Sporomusa	6.45016e-05	4.60929e-05	8.24878e-05	0	0	0	8.11293e-05	4.34226e-05	0	0	6.18888e-05	0.000154129	0.000298343	0	0	0	9.90958e-05	0	0.000105272	0.000322581	4.05674e-05	0	0	0.000142946	0	0.000140511	0.000316761	0	0	9.70674e-05	0	9.37172e-05	0	0	0.000421636	0	7.6206e-05	0.000161296	0.000143311	0	0	0	0	0	0	0	6.46998e-05	9.90099e-05	4.06322e-05
Rhodothermaceae_Group	0.000290257	0	0.000329951	0	8.15009e-05	0	0	0	0	0	0	0.000238199	0.000408259	3.22622e-05	0	0.000331134	4.95479e-05	0	8.42176e-05	3.58423e-05	0.00016227	5.15251e-05	0	4.76485e-05	0	5.62042e-05	2.75444e-05	0.000395611	0	0.000206268	0.00014976	3.74869e-05	0.000130495	0	0	0.000249739	0.00012701	0.000143374	0.00019843	0	0.000312885	0	0	0	0	9.35322e-05	0	0	0
Candidatus_Regiella	0	0	0	0	0	0	0	0	0	0	0	0.000112093	0	0	0	0	0	0	6.31632e-05	0	0	0	4.8815e-05	0	0	0	0	0	0	0	0.000224641	0	0	0	0	0.00106707	0	0	0	6.1192e-05	0	5.04383e-05	0	0	0	0	0	0	0
vadinBC27	0.000451511	7.68214e-05	0	0	0	0	0	0	0	0	0	0.000434362	0.000408259	0.000338753	0.000174229	0	4.95479e-05	0	8.42176e-05	0	0	0	0	0	2.88459e-05	0	0	0	0.00104839	0	0.00014976	0.000393612	0	3.7669e-05	0	0.000340553	5.0804e-05	0	6.61434e-05	0	0	0	4.59971e-05	0.00020104	0	0.000888556	0	0	0
Mesorhizobium	0.000387009	0.000230464	0.000549919	5.8578e-05	0	0	0.000101412	0.000412514	4.79409e-05	0	0	0.000294245	0.000219832	0.00043554	0	0	0.000173418	0	0.000168435	0.00259857	0.000189315	0	4.8815e-05	0.000142946	0	0.000238868	5.50888e-05	0.000104108	0.000533077	0.000412536	0.000349441	0.0018556	5.21982e-05	3.7669e-05	0.00185219	0.000953549	5.0804e-05	0.00146959	0.00120161	0	0.000229449	0	0.00016099	0	8.8657e-05	0	0.00015528	0.000325318	0.000257338
Erythrobacteraceae_Group	6.45016e-05	0	8.24878e-05	0	0	0	6.0847e-05	0.000108556	2.39705e-05	0	0	2.80234e-05	9.42137e-05	0	0	5.09437e-05	4.95479e-05	0	4.21088e-05	0.000268817	9.46573e-05	0	0.000146445	4.76485e-05	0	5.62042e-05	0	4.16432e-05	3.55385e-05	0.000194135	0.000199681	0.000224921	0	0	0.000210818	0.00031785	5.0804e-05	0.000268827	0.000121263	0	0	0	0	0	2.53306e-05	9.35322e-05	0.000284679	0.000325318	0.000108353
Alkanibacter	3.22508e-05	0	0	0	0	0	0	0	0	0	0	0	0	0	0	0	0	0	0	0	0	0.00010305	0	0	0	0	0	0	0	0	0	3.74869e-05	0	0	0	6.81106e-05	0	0	0	0	0	0	0	0	0	0	0	0	0
Beggiatoa	3.22508e-05	0	0	2.9289e-05	8.15009e-05	3.1507e-05	4.05647e-05	0	2.39705e-05	0	6.18888e-05	7.00584e-05	4.71069e-05	0	0	0.000178303	0.000247739	5.06098e-05	4.21088e-05	7.16846e-05	0.000311017	0.000180338	0	0.000190594	4.80765e-05	4.21532e-05	0	0.000208216	0	4.85337e-05	0.000324481	0	0	5.65036e-05	0.000150584	0	0.00012701	7.16872e-05	6.61434e-05	0	0.000187731	0	0	0	5.06611e-05	9.35322e-05	0.00010352	0	0
koll13_Group	3.22508e-05	0	0	0	3.26004e-05	0.000110274	0.000202823	0	0	0	0	0	0	0	0.000174229	0.000229247	9.90958e-05	0	0	0.000501792	0.000175792	0.000360676	0.000317298	0.000452661	0	2.81021e-05	0	0.00012493	0.000106615	0.000327602	0.000374401	0.00106838	2.60991e-05	3.7669e-05	6.02337e-05	0.00031785	0	0.000394279	0.000363789	0	0	0	0	7.17999e-05	2.53306e-05	0	2.58799e-05	0	0
Phycisphaera	3.22508e-05	0	0	0	0	0	0	0	0	0	0	0	6.28091e-05	0	0	0	0	5.06098e-05	0.000126326	0	0	0.000128813	0	0	0	0	0	0	5.33077e-05	2.42668e-05	0	0	0	0	0.00019576	6.81106e-05	5.0804e-05	0	3.30717e-05	0	0	0	0	0	0	0	5.17598e-05	0	2.70882e-05
Variibacter	0.000145129	3.07286e-05	0.00013748	0	3.26004e-05	0	0.000101412	0	0	0	0	0	0	4.83933e-05	0	0	4.95479e-05	5.06098e-05	6.31632e-05	0.000125448	0	0	0	0	0	7.02553e-05	0	0	0.000177692	2.42668e-05	0	0.000224921	0	0	0.000316227	0	0	0.000250905	9.92151e-05	0	0	0	0	0	0	0	0	0	0
Sporosarcina	0	0	0	0	0	3.1507e-05	0	0	0	0	0	0	0	0	0	0	4.95479e-05	0	0	3.58423e-05	0	0	0	0	0	0	0	0	0	0	0	0	0	0	3.01169e-05	0	0	0	2.20478e-05	0	0	0	0	0	0	0	0	0	0
Luteivirga	0	0	0	0	0	0	0	0	0	0	0	0	0	0	2.90381e-05	0	0	0	0	0	0	5.15251e-05	0	0	0	0	0	0	0	0	0	0	0	0	0	0	0	0	0	4.5894e-05	4.17179e-05	3.0263e-05	0	0	0	0	0	0	0
Anaerobiospirillum	0	0	0	0	0	0	0	0	0	0	0	0	0	0	0	0	0	0	0	0	0	0	0	0	0	0	0	0	0	0	0	0	0	0	0	0	0	0	0	6.1192e-05	0	0.000191666	0	0	0	0	0	0	0
Azolla	0	0	0	0.000102512	0	3.1507e-05	0	0.000303958	2.39705e-05	6.25029e-05	0.000402278	7.00584e-05	0.000125618	0	0	0	0	0	0	0	0	0	0	0.000428837	0	0	0	0	0	0	0	0	0	0	0	0	0	0	0	0	0.000187731	0	0	0	0	0	0	0	0
Odoribacter	0	4.60929e-05	0	0	3.26004e-05	0.000110274	0.000101412	0	4.79409e-05	0	0	8.40701e-05	4.71069e-05	0	4.35572e-05	0	0	0	6.31632e-05	0	0	0	0	0	6.7307e-05	7.02553e-05	0.000165266	4.16432e-05	0.000142154	3.64003e-05	0	0	0	0	0	0	0	0	2.20478e-05	0	0	6.0526e-05	4.59971e-05	5.74399e-05	5.06611e-05	0	0	2.82885e-05	2.70882e-05
Prototheca	0	0	0	0.000263601	0	3.1507e-05	0	0	0	3.12515e-05	0	2.80234e-05	0.000157023	0	0	0	0	0	8.42176e-05	0	0	0	0	0	0	0	0	4.16432e-05	0	2.42668e-05	0	0	0	0	0	0	0	0	0	0	0	0	0	0	0	0	0	2.82885e-05	0
Rickettsia	6.45016e-05	0	5.49919e-05	0	0	0	0	0	0	0	6.18888e-05	2.80234e-05	0	0	0	0	0	0	0	7.16846e-05	0	0	0	0	0	0	0	0	0	4.85337e-05	0	0	0	0	0	0	0	0	8.81912e-05	0	0	0	0	0	5.06611e-05	0	0	4.24328e-05	0
Hirschia	4.83762e-05	0	5.49919e-05	0	0	3.1507e-05	0	0	0	4.68772e-05	9.28333e-05	0	0	0	0	0	0	0	8.42176e-05	0.000197133	0	0	9.763e-05	0	0	0	0	0.000208216	0	0.000169868	4.99201e-05	0	0	0	0.000150584	0.000113518	5.0804e-05	0.000179218	0.000154335	0.000137682	0.000229449	4.03506e-05	0.00016099	7.17999e-05	6.33264e-05	0	0.00014234	0.000155587	2.70882e-05
Arthrospira	0	0	0.000164976	0	0	0	4.05647e-05	4.34226e-05	0	0	0	0	9.42137e-05	0	0	0	0	0	4.21088e-05	0.000107527	0	0	0	4.76485e-05	0	0	2.75444e-05	0	5.33077e-05	0	0	0	0	0	6.02337e-05	0	0	3.58436e-05	3.30717e-05	0	0	0	0	0	5.06611e-05	0	0.000349379	0.000268741	9.48086e-05
Mobiluncus	0.000145129	0	0	0	0	7.87674e-05	0.000141976	4.34226e-05	0	0	0	0.000154129	4.71069e-05	0	0	0	0	0	6.31632e-05	0.000322581	0	5.15251e-05	0	9.52971e-05	0	0.000112408	4.13166e-05	0	0	0	0	7.49738e-05	0	5.65036e-05	7.52921e-05	0	0	0.000107531	0.000110239	0	0	0	0	0	0	0	0	0	0
Candidatus_Nasuia	0	0	0	0	0	3.1507e-05	0	0	0	0	0	0.000140117	3.14046e-05	0	4.35572e-05	0	0	0	0.000105272	0	0	0	0.000122038	0	0	0	0	0	7.1077e-05	0	0.000374401	0	0	0	0	0.000408664	0	0	0	0	0	0	0	2.872e-05	0	0	0	0	0
Rhodovarius	8.0627e-05	9.21857e-05	0	0.00016109	0	0	0	0.000130268	2.39705e-05	0	0	2.80234e-05	0	0	0	5.09437e-05	0.00012387	0	6.31632e-05	0.000215054	5.40899e-05	0	0	0	1.92306e-05	8.43064e-05	0.000110178	0	0.000142154	4.85337e-05	0	0	0	3.7669e-05	9.03506e-05	0	7.6206e-05	0.000107531	7.71673e-05	0	0.000166872	0.000110964	0	2.872e-05	0.000177314	0	0.000232919	0.000113154	0.000121897
Denitrobacter	0	0	0.000164976	0.000483269	0	0	0	0	0	0	0	0	0	0	0	0	0	5.06098e-05	0	0	0	0	0	0	0	0	0	0	0	0	0	0	0	0	0	0	0	0	0	0	0	0	0	0	0	0	0	0	0
Corynebacteriaceae_Group	8.0627e-05	0	0	0	0	0	0	0	0	0	0	0.000238199	0.000329748	0	0	0	0.000297287	0	0.000484251	7.16846e-05	0	0.000180338	0	0	1.92306e-05	0	0	0	0.000266539	3.64003e-05	0	0.000206178	0	0	9.03506e-05	0	0	3.58436e-05	0.000110239	0	0	0	0	0	0	0	0	0.00019802	0
Actinobacillus	3.22508e-05	0	0	0.000146445	3.26004e-05	3.1507e-05	0	0	0	6.25029e-05	0	2.80234e-05	0	0	2.90381e-05	0	0	5.06098e-05	0	0	0	0	0	0	1.92306e-05	4.21532e-05	0	0	0	0	4.99201e-05	0	0	0	0	0.000136221	0	0	0	9.1788e-05	0.000125154	0.000292542	4.59971e-05	0	3.79958e-05	0.000420895	0	0	0
Aeromicrobium	0.000161254	0	0.000164976	2.9289e-05	0	0	6.0847e-05	0	0	0	0	0	0	0	0.000101633	0	0	5.06098e-05	0.000210544	0.000340502	8.11348e-05	7.72877e-05	0	4.76485e-05	0	7.02553e-05	0	0	0.000195462	0	0	0.000412356	0	0	0.000225876	0	7.6206e-05	0.000125453	0.000132287	0	0	0	0	0	0	0	0	0	0
Cloacibacterium	0	0	0	0	0	0	0	0	0	0	0	0	0	0	0	0	0	0	0	0	0	0	0	0	0	0	0	0	0	0	0	0	0	0	0	0	0	0	0	0	0	0	0	0	0	0	2.58799e-05	0	0
Candidatus_Hamiltonella	3.22508e-05	0	0	0	0	0	0	0	2.39705e-05	0	0	2.80234e-05	0	0	0	0	0	0	0	5.37634e-05	0	0	0	0	0	0.00012646	0	0	0	0	0.000199681	9.37172e-05	0	0	0.000120467	0.000794624	0	0	0	0	0	0	0	0	0	0	0	0	2.70882e-05
Novispirillum	6.45016e-05	6.14571e-05	0	0	4.89006e-05	0	0	0	0	0	9.28333e-05	0	3.14046e-05	0	2.90381e-05	0	0	0	0	0	0	0	0	0	1.92306e-05	4.21532e-05	0	0.000458076	0	0	4.99201e-05	9.37172e-05	0.000378437	0	0.000135526	0.000136221	0	0	0	0	0	0	0	0	2.53306e-05	0	0	0	2.70882e-05
Congregibacter	0.000129003	0.000522386	0	4.39335e-05	0	7.87674e-05	6.0847e-05	8.68451e-05	0	3.12515e-05	0	0.000280234	0.000172725	0.000241967	0.000174229	0	0	7.59148e-05	8.42176e-05	0.000125448	9.46573e-05	0.000128813	0	0.000142946	0.00016346	0.00053394	6.8861e-05	0	0.000106615	6.06671e-05	0.000349441	9.37172e-05	0	0	0.00019576	0.000658403	5.0804e-05	0.000143374	0.000220478	3.0596e-05	0.000125154	5.04383e-05	9.19942e-05	0	0.000139318	0.000187064	0	4.24328e-05	5.41763e-05
Leptolyngbya	3.22508e-05	3.07286e-05	0	0	0	3.1507e-05	0	4.34226e-05	0	0	0	0	0.00034545	0	0	0	0	0	4.21088e-05	0	0	0	0	0	0.000105768	0.000168613	0	0	0	0	4.99201e-05	0	0	0	7.52921e-05	0	0	0	0	0	0	0	0	0	0.000189979	0.000140298	0	0	0
Paucibacter	3.22508e-05	0	0	0	0	0	0	0	0	0	0	0	0	8.06556e-05	0	0	0	0	0	0	2.70449e-05	0	0	0	0	0	0	0	0	0	0	3.74869e-05	0	0	0.000105409	0	0	3.58436e-05	5.51195e-05	0	0.00060491	0	0	0	0	0	0	0	0
Buchnera	0	0	0	0	6.52007e-05	0	0	0	0	0	0	7.00584e-05	0	0	0	0.000203775	0	0	0	0	0	0	7.32225e-05	0	0	0	0	0.000145751	0	0	0.000299521	5.62303e-05	0.000156595	0	0	0.000408664	0	0	0	0	0	0	0	0	0	0	0	0	0
Pimelobacter	0.000596639	6.14571e-05	0.000439935	0	0	0	0.000243388	4.34226e-05	0	0	0	0	9.42137e-05	0	2.90381e-05	0	9.90958e-05	0.00010122	0.00052636	0.000770609	6.76123e-05	5.15251e-05	0	0.00016677	1.92306e-05	8.43064e-05	0.000165266	0	0.000870693	4.85337e-05	0	0.00134953	0	3.7669e-05	0.000647512	0	0.000152412	0.000340514	0.000584267	0	0	0	0	0	0	0	0	0	0
Mucilaginibacter	3.22508e-05	0	0	2.9289e-05	0	0	0	0	0	0	0	2.80234e-05	0	0	0	0	0	0	4.21088e-05	0	0	0	4.8815e-05	0	0	0	0	0	0	0	0	0	0	0	0	0	0	0	0	0	0	0	0	0	0	0	0	0	0
Desulfurivibrio	6.45016e-05	3.07286e-05	0	0	0	0	0	0	0	0	0	0	0	0	2.90381e-05	0	0	0	0	0	0	0.000128813	0	0	0	0	0	0	0	4.85337e-05	0	0.000149948	0	0	0	0	0	0	0	0	0	0	0	0	0	0	0	2.82885e-05	0
Zobellella	0	0	0	0	0	0	0	0	0	0	0	0	0	4.83933e-05	0	0	0	0	0	0	0	0	0	0	0	0	0	0	0	0	0	0	0	0	0	0	0	0	0	0	0.000104295	2.01753e-05	0	0	2.53306e-05	9.35322e-05	0	2.82885e-05	0.000243793
Dichotomicrobium	3.22508e-05	0	0	0	8.15009e-05	0	0	0	0	0	0	0	0	4.83933e-05	0	0.000127359	0	0	0	0	0	0	0	0	0	0	0	0.000291503	0	0	0.000199681	3.74869e-05	0.000260991	0	4.51753e-05	0.000227035	0	3.58436e-05	0	0	0	0	0	0	0	0	0	0	0
Thermoactinomycetaceae_Group	0	0	0	0	0	0	0	8.68451e-05	0	0	0	0	0	0	0	0	0	0	0	0	0	0	0	0	0	0	0	0	0	0	0	0	0	0	0	0	0	0	0	0	0	0	0	0	0	0	0	0	0
Draconibacteriaceae_Group	4.83762e-05	0	0	0	0	3.1507e-05	0	0	0	0	0	0	0	3.22622e-05	0	0	0	0	0	0	0	0	0	0	0	2.81021e-05	0	0	0	0	0	3.74869e-05	2.60991e-05	0	0	6.81106e-05	0	0	0	0	0	0	0	0	0	9.35322e-05	0	0	0
Echinicola	0.000145129	3.07286e-05	8.24878e-05	8.7867e-05	0	9.45209e-05	4.05647e-05	0.000108556	4.79409e-05	3.12515e-05	0	5.60467e-05	7.85114e-05	0	0	0	7.43218e-05	5.06098e-05	0.000105272	7.16846e-05	9.46573e-05	7.72877e-05	0	4.76485e-05	1.92306e-05	5.62042e-05	5.50888e-05	6.24649e-05	0.000284308	3.64003e-05	0	0	6.52477e-05	5.65036e-05	0	0.000136221	5.0804e-05	7.16872e-05	4.40956e-05	3.0596e-05	0.000104295	0	9.19942e-05	2.872e-05	0.000151983	9.35322e-05	0.00010352	0	8.12645e-05
Sedimentitalea	0	0	0	2.9289e-05	0	3.1507e-05	0	0	0	3.12515e-05	0.000247555	0	3.14046e-05	6.45245e-05	0	0	0	0	0	0	0	0	4.8815e-05	0	1.92306e-05	2.81021e-05	0	0	0	0	0	0	0	0	0	0	0	0	2.20478e-05	0	0	5.04383e-05	0	2.872e-05	0	0	0	0	4.06322e-05
Tepidamorphus	3.22508e-05	0	0	0	0	0	0	6.51339e-05	0	0	0	0	0	0	0	0	0	0	0	8.96057e-05	0	0	0	4.76485e-05	0	0	0	0	0	0	0	3.74869e-05	0	0	4.51753e-05	6.81106e-05	0	0	0	3.0596e-05	0.000354603	0	6.89957e-05	7.17999e-05	3.79958e-05	0	9.05797e-05	0.000113154	2.70882e-05
Croceimarina	0	4.60929e-05	0	0	0	4.72605e-05	0	0	0	0	0	0	0	0	0	0	0	0	0	0	0	0	0	0	0	0	0	0	0	0	0	0	0	0	0	0	0	0	0	0	0	0	0	0	0	0	0	0	0
Achromatium	0.000274132	6.14571e-05	0	0	0	9.45209e-05	0	0	0	0	0	0	4.71069e-05	3.22622e-05	4.35572e-05	0	0.000222965	0	6.31632e-05	3.58423e-05	0	0	0	0	3.84612e-05	5.62042e-05	2.75444e-05	4.16432e-05	0	2.42668e-05	7.48802e-05	0	0	0	6.02337e-05	0.000113518	5.0804e-05	0	4.40956e-05	0	0	0	4.59971e-05	0	0	0	3.88199e-05	2.82885e-05	0
Lysinimonas	3.22508e-05	6.14571e-05	8.24878e-05	0	0	0	0	0	0	0	0	0.000112093	0.000109916	0	0	0	0	0	8.42176e-05	0.000304659	2.70449e-05	0	0	4.76485e-05	0	0.00012646	0	0	5.33077e-05	0	4.99201e-05	0.000318638	0	0	0.000240935	0.000158925	0	0.000232983	0.000187406	0	6.25769e-05	0	0	0	3.79958e-05	0	7.76398e-05	0.00029703	2.70882e-05
Endolissoclinum	6.45016e-05	4.60929e-05	0.000164976	0	4.89006e-05	3.1507e-05	6.0847e-05	0	0	4.68772e-05	0.000123778	0	3.14046e-05	3.22622e-05	2.90381e-05	5.09437e-05	7.43218e-05	0	0	0.000107527	6.76123e-05	5.15251e-05	7.32225e-05	0.000142946	1.92306e-05	5.62042e-05	0	0.000104108	0	4.85337e-05	7.48802e-05	5.62303e-05	3.91486e-05	7.53381e-05	0.000150584	9.08141e-05	5.0804e-05	0	9.92151e-05	4.5894e-05	0	0	0	0	6.33264e-05	0	0.00010352	8.48656e-05	8.12645e-05
Arenitalea	0	0	0	0	0	3.1507e-05	0	6.51339e-05	0	0	0	0	3.14046e-05	0	0.000101633	0	0	0	0	3.58423e-05	0	0	0	0	2.88459e-05	2.81021e-05	5.50888e-05	0	0.000124385	0	0	7.49738e-05	0	0	0	0	5.0804e-05	0	4.40956e-05	6.1192e-05	4.17179e-05	7.06136e-05	0.000390975	7.17999e-05	5.06611e-05	0	0	5.65771e-05	5.41763e-05
Subsaximicrobium	0	0	0	0	0	0	0	0	0	0	0	0	6.28091e-05	0	4.35572e-05	0	0	0	8.42176e-05	5.37634e-05	0	0	0	0	0	0	5.50888e-05	0	3.55385e-05	2.42668e-05	0	0	0	0	0	0	5.0804e-05	3.58436e-05	0	0	8.34359e-05	3.0263e-05	9.19942e-05	2.872e-05	7.59917e-05	0.000280597	0.00014234	8.48656e-05	0.000121897
MWH_Ta3	0	0	0	2.9289e-05	0	0	0.000101412	0	0	3.12515e-05	0	0.000308257	0.000141321	0	0	0	0	0	0	8.96057e-05	0	0	0	0	0	0	0	0	0	0	0	3.74869e-05	0	0	0	0	0	7.16872e-05	3.30717e-05	0	0	0	0	0	0	0	0	0	0
Rhodobium	6.45016e-05	0	0	0	0	0.000157535	0	0	0	0	9.28333e-05	0	4.71069e-05	4.83933e-05	0	0.000101887	0	0	0	0	4.05674e-05	0.00010305	0	0	0.000173075	4.21532e-05	0	0	3.55385e-05	0	0	3.74869e-05	0	0	7.52921e-05	6.81106e-05	7.6206e-05	7.16872e-05	5.51195e-05	0	0.00020859	0	0	0	0	0	0	7.07214e-05	0
Candidatus_Chloracidobacterium	0	0	0	0	0	0	0	0	0	0	0	0	0	0	0	0	0	0	0	0	0	0	0	0	0	0	0	0	0	0	4.99201e-05	0	0	0	0	0.000635699	0	0	0	0	0.000146013	0	0	0	0	0	0	0	0
Brachymonas	0	0	0	8.7867e-05	0	0	0	4.34226e-05	0	0	0	0	0	0	0	0	0	0	0	0.000143369	0	0	0	0	0	0	0	0	0	0	0	0	0	0	6.02337e-05	4.54071e-05	0	3.58436e-05	0	0	8.34359e-05	0	0	0	0	0	0	0	0
Cocleimonas	0	0	0	0	0	0.000756167	0	0	0	0	0	0	0	0	0	0	0	0	0	0	0	0	0	0	0	0	0	0	0	0	0	0	0	0	0	0	0	0	0	0	0	0	0	0	0	0	0.00010352	0	0
Actinomadura	0.000193505	3.07286e-05	5.49919e-05	0	0	0	4.05647e-05	0	0	0	0	2.80234e-05	3.14046e-05	0	0	0	4.95479e-05	5.06098e-05	0.000378979	0.00016129	6.76123e-05	7.72877e-05	0	0	0	0	2.75444e-05	0	0.000302077	0	0	0.000131204	2.60991e-05	0	6.02337e-05	0	0	0.000125453	0.000187406	0	0	0	0	0	0	0	0	0	0
Amorphus	0	3.07286e-05	0	0	0	0	0	0	0	0	0	0	0	0	0	0	0	0	0	0.000125448	0	5.15251e-05	0	0	0	5.62042e-05	0	0	0	3.64003e-05	0	0	0	0	0.000120467	0	0	0.000107531	0	0	0	0	0	0	0	0	0	0	0
Simplicispira	3.22508e-05	3.07286e-05	0	0.000688292	0	3.1507e-05	0.000121694	0.000694761	0	0	0	0.000182152	0.000157023	4.83933e-05	0	0	0	0	4.21088e-05	0.000681004	0	0.00010305	0.000244075	0	0	0.00012646	0	4.16432e-05	8.88462e-05	9.70674e-05	0.000474241	0.000224921	0	5.65036e-05	0.000436694	0.000840031	0	0.000376358	0.000154335	0	0.000166872	3.0263e-05	0	0	0.000177314	0	0.000336439	9.90099e-05	0.000176073
Salinibacterium	0	0	0	0	0	0	4.05647e-05	4.34226e-05	0	0	0	0	0	0	0	0	0	0	0.000105272	0.000842294	8.11348e-05	0	9.763e-05	0	0	9.83574e-05	0	0	3.55385e-05	0.000121334	0	0.000243665	3.91486e-05	0	0.000210818	0.000681106	5.0804e-05	0.000519732	6.61434e-05	0	0.000125154	0	0	0	2.53306e-05	0	9.05797e-05	0.000353607	0
Afipia	4.83762e-05	4.60929e-05	0.000439935	0	0	0	0	6.51339e-05	0	0	0.000123778	0	4.71069e-05	0	0	0	4.95479e-05	0	6.31632e-05	0.000197133	4.05674e-05	0	0	0.000119121	1.92306e-05	2.81021e-05	0	0.000166573	7.1077e-05	0.000109201	0	0.000112461	2.60991e-05	0	0.000346344	0.000158925	5.0804e-05	0.000286749	0.000319693	0	0.000125154	0	0	0	0	0	3.88199e-05	0	0
Desulfocella	0	0	0	0	0	0	0	0	0	0	0	0	0	0	0	0.000101887	0	0	0	0	0	0	9.763e-05	0	0	0	0	0.000208216	0	0	0.000274561	0	0.000169644	0	0	0.00038596	0	0	0	0	0	0	0	0	0	0	0	0	0
Thiomicrospira	0	0	0	0	0	3.1507e-05	0	0	0	0	0	5.60467e-05	0	0	0	0	0	0	0	0	4.05674e-05	0.00010305	0	0	0	0	0	0	0	0	0	0	3.91486e-05	0	0	0	0	0	0	0.000107086	8.34359e-05	0.000232016	0	0	0.000303967	9.35322e-05	0	0	0
Ruminococcus	0	6.14571e-05	0	0	0	7.87674e-05	0	0	0	0	0	0.000154129	7.85114e-05	0	2.90381e-05	0	4.95479e-05	0	8.42176e-05	0.000125448	0	0	0	4.76485e-05	0	0.000182664	0	0	3.55385e-05	0	0	3.74869e-05	0	0	0.000421636	0	5.0804e-05	0.000107531	2.20478e-05	0	4.17179e-05	0	0	0	0.000987892	0	0.00108696	0.00141443	2.70882e-05
Algibacter	4.83762e-05	0.000384107	0	5.8578e-05	6.52007e-05	0.000850688	0.000202823	0.000282247	2.39705e-05	0.00010938	0	0.000350292	0.000439664	8.06556e-05	0.000261343	0	4.95479e-05	0	0.00018949	0.000107527	0	5.15251e-05	4.8815e-05	0	0.000105768	0.000365328	0.000302989	0	0.000159923	0	4.99201e-05	5.62303e-05	0	0	4.51753e-05	4.54071e-05	0	3.58436e-05	7.71673e-05	6.1192e-05	0.000250308	0.000121052	0.000666958	7.17999e-05	0.000189979	0.00107562	7.76398e-05	9.90099e-05	0.000189617
Isoetes	0	0	0	0.000234312	0.000179302	0.000189042	0.000101412	0	4.79409e-05	0.000250012	0.000154722	7.00584e-05	0	0	0	0	0	0	0	5.37634e-05	0	0	0	0	0	0	0	0	0	0	0	0	0	0	0	0	0	3.58436e-05	0	0	0.000333744	0	0	0	5.06611e-05	0	0	0	0
Oxalobacteraceae_Group	0	0	0	0.000336824	0	3.1507e-05	0	0.00067305	0	0	0	0	0	8.06556e-05	0	0	0	0	4.21088e-05	0.00078853	0	0	0	0	0	2.81021e-05	0	4.16432e-05	3.55385e-05	0	0	0	2.60991e-05	0	6.02337e-05	0.000340553	0	0.000465967	0	3.0596e-05	0.000876077	0	0	0	2.53306e-05	0	6.46998e-05	0	2.70882e-05
Inquilinus	8.0627e-05	7.68214e-05	0.000109984	0.000307535	8.15009e-05	7.87674e-05	0.000182541	0.000151979	0.000107867	0.000140632	0.000185667	9.80818e-05	3.14046e-05	9.67867e-05	4.35572e-05	0.000127359	9.90958e-05	0.00010122	4.21088e-05	0.00016129	0.000121702	0	0.000170853	0.000190594	0	0.000140511	0	4.16432e-05	0	0	0.00014976	0	2.60991e-05	0.000150676	0.000180701	0.000158925	0.000177814	7.16872e-05	9.92151e-05	3.0596e-05	4.17179e-05	2.01753e-05	4.59971e-05	0	0.000202645	0	0.000168219	9.90099e-05	6.77204e-05
Smithella	0	0.000553114	0	0.000175734	0.000146702	0.000110274	0.000141976	0.000260535	0.000179779	0.000562526	0.000371333	7.00584e-05	0.000188427	9.67867e-05	0.000188748	0	0	0.000227744	4.21088e-05	0	0	0	0	0	0.000115384	0.000730655	4.13166e-05	4.16432e-05	0	0	9.98403e-05	0	0.000169644	7.53381e-05	4.51753e-05	0	0.000101608	0	0	0.000137682	0	2.01753e-05	0	0	2.53306e-05	0	0	0.000113154	0.000108353
Skermania	8.0627e-05	3.07286e-05	5.49919e-05	0	0	0	4.05647e-05	0	0	0	0	0.000182152	6.28091e-05	3.22622e-05	0	0	0	5.06098e-05	0.000168435	0.00016129	2.70449e-05	0	0	0	0	9.83574e-05	4.13166e-05	0	7.1077e-05	2.42668e-05	0	0.000168691	0	0	6.02337e-05	0	0	8.96089e-05	9.92151e-05	0	0	0	0	0	0	0	0	0	0
Raoultella	0	0	0	2.9289e-05	3.26004e-05	0	0	0	0	0	0	0	0	0.000129049	0	5.09437e-05	0	0	0	0	0	0	0	0	0	0	0	0	0	0	0	0	0	0	0	0.000113518	0	0	0	3.0596e-05	0	5.04383e-05	0	0	3.79958e-05	0	0	0	0.000216705
Steroidobacter	3.22508e-05	0	0	0.000263601	0	0	0	8.68451e-05	0	0	0	0	0	0	0	0.000101887	0.000148644	7.59148e-05	8.42176e-05	7.16846e-05	2.70449e-05	5.15251e-05	0	4.76485e-05	0	0	0	0	3.55385e-05	8.49339e-05	0	0	0	0.000113007	4.51753e-05	0	0.000177814	3.58436e-05	4.40956e-05	0	0	0	0	0	0.000113988	0	0.00010352	0.000127298	9.48086e-05
Azomonas	3.22508e-05	0.000169007	0	0.000527202	0	0	0	0.000369092	4.79409e-05	0	0	5.60467e-05	0	6.45245e-05	0	0	0	0	0	0.000394265	5.40899e-05	0	0	0	0	0.000281021	0.000110178	0	0	7.28005e-05	4.99201e-05	0.000112461	0	0	0.000391519	0	0.000152412	0.00019714	9.92151e-05	3.0596e-05	0	0.000141227	0.000137991	0	0.000367293	0	0.000621118	0.000240453	0.000176073
Leptobacterium	0	0	0	0	0	0	0	0	0	0	0	0	0	0	0	0	0	0	0	0	0	0	0	0	0	0	0	0	0	0	0	0	0	0	0	0	0	0	0	0	0	0	0	2.872e-05	0	0	0	0	0
Sulfurimonas	0	0	0	2.9289e-05	0	0.000378084	6.0847e-05	0	0	0	6.18888e-05	4.20351e-05	7.85114e-05	0	0	0	0	0	0	0	0	5.15251e-05	0	0	0	0	0	0	0	0	0.000349441	0	0	3.7669e-05	0	0.000113518	0	0.000107531	6.61434e-05	0.000122384	0	0.000221929	0	0	0	0.000233831	2.58799e-05	2.82885e-05	0
Corallibacter	0	0	0	0	0	0	0	0	3.59557e-05	0	0	0	0	3.22622e-05	0	0	0	0	4.21088e-05	0	0	0	0	0	0	0	0	0	0	0	0	0	0	0	0	0	0	0	0	3.0596e-05	0	0	0	0	0	9.35322e-05	0	0	2.70882e-05
Anaerovibrio	0	0	0	0	0	0	0	0	0	0	0	0	0	0	0	0	0	0	0	0	0	0	0	0	0	0	0	0	0	0	0	0	0	0	0	0	0	0	0	0	0	0	0	0	0	0	0	0	0
Thermovirga	0	0	0	0	0	0	0	0	0	0	0	0	0	0	0	0	0	0	0	0	0	0	0	0	0	0	0	0	0	0	0	0	0	0	0	0	0	0	0	0	0	0	0	5.74399e-05	0.000202645	0	0	0	6.77204e-05
Kineosphaera	0	0.00010755	0	0	0	0	0.000162259	0	0	0	0	0.000224187	0.000125618	0	4.35572e-05	0	0	0	0	0.00016129	2.70449e-05	0	0	0	0	8.43064e-05	6.8861e-05	0	0	2.42668e-05	0	7.49738e-05	0	0	4.51753e-05	0	0	7.16872e-05	2.20478e-05	0	0	0	0	0	0	0	0	0	0
Thioclava	0	0	0	0	0	0.000110274	4.05647e-05	0	0	0	0	2.80234e-05	0	0	0	0	0	0	0	0.000125448	0	0	0	0	2.88459e-05	0	6.8861e-05	0	3.55385e-05	6.06671e-05	0	0	0	0	3.01169e-05	0	0	3.58436e-05	6.61434e-05	0	0	4.03506e-05	4.59971e-05	5.74399e-05	0.000113988	0	0.00011646	7.07214e-05	0
Gordonia	0	3.07286e-05	5.49919e-05	7.32225e-05	0	3.1507e-05	0	0	0	0	0	7.00584e-05	4.71069e-05	0	0	0	0	0	0.000294762	0.000250896	0	5.15251e-05	0	0	0	0	0	0	0.000177692	0	0	0.000187434	0	0	0.00019576	0	5.0804e-05	3.58436e-05	8.81912e-05	0	0	2.01753e-05	0	0	5.06611e-05	0	3.88199e-05	2.82885e-05	0
Fontibacter	0	0	0	0	0	0	0	0	0	0	0	0	0	0	0	0	0	0	0	0	0	0	0	0	0	0	0	4.16432e-05	0	0	0	0	0	0	0	0	0	0	0	3.0596e-05	0.000333744	3.0263e-05	0	0	0	0	0	0	0
Oxobacter	0	7.68214e-05	0	0	0	0	0	0	0	0	0.000185667	9.80818e-05	0	0	0	0	0	0	8.42176e-05	5.37634e-05	2.70449e-05	0	0	0	0	4.21532e-05	0	0	0	0	0	0	0	0	0.000240935	0	0	3.58436e-05	0	0	0	0	0	0	0	0	0	0	0
GZKB119_Group	0	0	0	0	4.89006e-05	0	0	0	0	0	0	0	4.71069e-05	0	0	0.000331134	0	0	0	0	0	5.15251e-05	0	0	0	2.81021e-05	0	0.000229038	0	0	0	0	0.000208793	0	0	0	0	0	0	0	0	0	0	0	0	0	0	0	0
Aliihoeflea	4.83762e-05	0	5.49919e-05	0	0	0	4.05647e-05	0.000108556	2.39705e-05	0	0	2.80234e-05	3.14046e-05	6.45245e-05	0	0	0	0	8.42176e-05	0.000250896	0	0	0	0	0	0	0	0	8.88462e-05	0	0	0	0	0	7.52921e-05	9.08141e-05	0	0.000161296	0.000209454	0	0.000166872	0	0	0	0	0	5.17598e-05	8.48656e-05	2.70882e-05
Exiguobacterium	0	0	0	0	0	0	0	0	0	0	0	0	0	0	0	0	0	0	0	0	0	0	0	0	0	0	0	0	0	0	0	0	0	0	0	0	0	0	3.30717e-05	0	0	0	0	0	0	0	0	0	0
Candidatus_Anadelfobacter	0	0	0	0	0	0	0	0	0	0	0	0	0	0	0	0	0	0	0	0	0	0	0	0	0	0	0	4.16432e-05	0	0	0	0	0	0	0	0	0	0	0	0	0	0	0	0	0	0	0	0	0
Desulfobulbaceae_Group	0	7.68214e-05	5.49919e-05	2.9289e-05	0	0.000393837	8.11293e-05	0	0	0	0	0	9.42137e-05	0	0	0	0	0.00015183	0	0.000179211	0	0	0	9.52971e-05	0	0.000140511	2.75444e-05	6.24649e-05	0	2.42668e-05	0	0.000187434	0	0	0.00106915	0	5.0804e-05	0.000143374	6.61434e-05	0	0	0	0	0	0	0	2.58799e-05	0	0
RFP12_Group	3.22508e-05	0	0	0	0	0	0	0	2.39705e-05	0	0	0	0	0	0	0	0	0	0	0	0	0	0	7.14728e-05	0	0	0	0	0	0	0	0	0	0	0.000361402	0	0	0	0	0	0	0	4.59971e-05	0	0	0	0	0	0
Sphingobacteriaceae_Group	0.000145129	0	5.49919e-05	0	0	0	0	0	0	0	0	0	0	0	5.80762e-05	0	4.95479e-05	7.59148e-05	4.21088e-05	0	0	0	0	0	0	0	2.75444e-05	0	3.55385e-05	6.06671e-05	0	0	0	0.000113007	0	0	0.000101608	0	0	0	0.000250308	0	0	0	0	0	0	0	9.48086e-05
Methanomicrobiaceae_Group	3.22508e-05	0	0	2.9289e-05	0	0	0	0	0	0	6.18888e-05	0	0	3.22622e-05	0	0	0	0	0	0	0	5.15251e-05	0	0	0	0	0	0	0	0	0	0.000562303	0	0	0.00028611	0.000136221	0	0	2.20478e-05	0	0	0	0	0	3.79958e-05	0	0	0	0
Frischella	0	0	0	2.9289e-05	6.52007e-05	0	0	0	0	6.25029e-05	0	0	0	3.22622e-05	2.90381e-05	5.09437e-05	0	0	0	0	2.70449e-05	0	0	0	0	2.81021e-05	0	0	0	0	0	0	0	0	0	0	0	0	0	3.0596e-05	6.25769e-05	9.0789e-05	0	0	2.53306e-05	0.000327363	0	0	6.77204e-05
Flavivirga	3.22508e-05	6.14571e-05	0	0	0	0.000204795	8.11293e-05	0	0	0	0	0.000196164	4.71069e-05	3.22622e-05	0	0	0	0	0	0	0	0	0	0	0	0.000154562	0	0	0	0	0	0	0	0	4.51753e-05	0	0	3.58436e-05	5.51195e-05	6.1192e-05	0.000166872	0.000232016	0.000505968	4.30799e-05	0.000101322	0.000187064	7.76398e-05	0.000113154	0.000108353
Portibacter	0.000129003	3.07286e-05	5.49919e-05	0	3.26004e-05	0.000850688	0	0	0	0	0	5.60467e-05	4.71069e-05	0	0	0	0.00012387	0	0.000105272	0	0	0.000128813	0	0	0	0	0	0	3.55385e-05	0	4.99201e-05	3.74869e-05	0	3.7669e-05	0	0	5.0804e-05	5.37654e-05	5.51195e-05	0	0	9.0789e-05	0	0	0	0	2.58799e-05	4.24328e-05	2.70882e-05
Thauera	0	0	0	0.000527202	0	0	0	0	0	0	0	0	0	6.45245e-05	0	0	0	0	0	0	0	0	9.763e-05	0	0	0	0	0	0	0	0.000773762	0	0	0	3.01169e-05	0.000840031	0	0	0	0	0	0	0	0	0	0	0	0	0
Heliimonas	3.22508e-05	0	0	8.7867e-05	0	0	0.000121694	4.34226e-05	0	0	0	2.80234e-05	0	3.22622e-05	0	0	0.000173418	0	0	0	9.46573e-05	0	0	4.76485e-05	0	0	0	0	5.33077e-05	0.000182001	0	0.000112461	0	0	0	0	0	0.000125453	0.000154335	0	0	2.01753e-05	0	0	2.53306e-05	0.000140298	0	0	0
Wautersiella	0	6.14571e-05	0	7.32225e-05	0	0	0	4.34226e-05	0	0	0	0	0	0	0	0	0	0	0	0.000125448	5.40899e-05	0	0	0	0	9.83574e-05	2.75444e-05	0	0	0	0	0	0	0	0.00028611	0	5.0804e-05	3.58436e-05	0	0	0	0	0	0	0	0	0.00010352	4.24328e-05	2.70882e-05
Lautropia	0	0	5.49919e-05	0.000175734	0	6.3014e-05	0	0	0	0	0	0	4.71069e-05	8.06556e-05	0	0	0	0	0	0.000107527	0	0	0	0	0	7.02553e-05	4.13166e-05	0	0	2.42668e-05	0	0	0	0	4.51753e-05	0	0	0	2.20478e-05	3.0596e-05	0.000187731	0	0	0	0	0	3.88199e-05	0	0
Colwelliaceae_Group	8.0627e-05	0	0	0	0	0	0	0	0	3.12515e-05	0	0	0	0	0	0	0	0	0	0	5.40899e-05	5.15251e-05	0	0	1.92306e-05	0	0	0	0	0	0	0	2.60991e-05	3.7669e-05	0	6.81106e-05	0	0	0	0	0.000166872	0.000151315	0	0	2.53306e-05	0.000374129	0	0	0
Filomicrobium	0	0	5.49919e-05	0	0	6.3014e-05	0	0	0	0	0	2.80234e-05	0	3.22622e-05	0	0	0	0	0	0	9.46573e-05	0	0	0	0	0	0	0	0	2.42668e-05	0	3.74869e-05	0	0	3.01169e-05	4.54071e-05	0	0.000143374	4.40956e-05	0	0	0	0	0	0	9.35322e-05	5.17598e-05	2.82885e-05	0
Aureimonas	4.83762e-05	0	0	0	0	0	0.000101412	0	0	0	0	2.80234e-05	0.000329748	0	5.80762e-05	0	4.95479e-05	0	0.00018949	0	0	0	0	0	0	0	2.75444e-05	0	0.000124385	0	9.98403e-05	3.74869e-05	0	0	0.000135526	0.000204332	0	0	0.000121263	0	6.25769e-05	0	0	0	0	0	3.88199e-05	0	0
Sulfuricurvum	0	0	0	0	0	0.000393837	0	0	0	0	0	0	0	0	0	0	0	0	0	0	0	0	0	0	0	0	0	0	0	0	0	0	0	0	0	0	0	0	0	0	0	0	0	0	0	0	0	0	0
Solwaraspora	0.000145129	9.21857e-05	5.49919e-05	0	0	0	8.11293e-05	0	2.39705e-05	0	0	0	0	0	5.80762e-05	0	0	0	0.00018949	0.000107527	0	0	0	0	0	0.000210766	6.8861e-05	0	0.000159923	0	0	3.74869e-05	0	0	0	0	0	3.58436e-05	6.61434e-05	0	0	0	0	0	0	0	0	0	0
Rhizobiaceae_Group	0.000177379	0.000122914	0	0	0	0	0	0	0	0	0	5.60467e-05	4.71069e-05	0	0	0	4.95479e-05	0	0.000147381	0.000125448	0	5.15251e-05	0	0	0	9.83574e-05	0	4.16432e-05	5.33077e-05	0	0	0.000337382	0	3.7669e-05	0.000301169	4.54071e-05	0	0.00030467	0.000110239	0	0	0	0	0	0	0	2.58799e-05	0	0
Candidatus_Tremblaya	0	0	0	0	0	0	0	0	2.39705e-05	0	0	0	0	0	0	0	0	0	0	3.58423e-05	0	0	0	0	0	0	0	0	0	2.42668e-05	0	0	0	0	0	0	0	0	2.20478e-05	0	0.000104295	0	0	0	0	0	0	0	0
Polymorphobacter	0	0	0	0	0	0	0	4.34226e-05	0	0	0	0	3.14046e-05	0	0	0	0	0	0	3.58423e-05	0	0	0	0	0	0	0	0	0	0	0	5.62303e-05	0	0	0.000135526	0	0	0	0	0	0	0	0	0	0	0	0.000245859	0.000113154	6.77204e-05
Henriciella	0	0	0	0	0	0	0	0	0	0	0	0	0	0	0	0	0	0	0.000210544	5.37634e-05	0	0	0	0	0	0	0	0	0	7.28005e-05	0	0	0	0	0	9.08141e-05	0	8.96089e-05	0	0	0	0	0	0	0	0	5.17598e-05	2.82885e-05	2.70882e-05
SHD_231	4.83762e-05	0.000153643	0	0	0	0	0	0	0	0	0	0	0	0	0	0	0	0	0	3.58423e-05	0	0	0	0.000119121	0	0.000182664	0	0	0	0	0	0	0	0	0.00057222	0	0	7.16872e-05	3.30717e-05	0	0	0	0	0	0	0	0	0	0
Asteroleplasma	0	0	0	2.9289e-05	0	0	0	0	0	0	6.18888e-05	0	0	0	2.90381e-05	0	0	0	0	0	0	0	0	0	0	0	0	0	0	2.42668e-05	0.000624002	0	0	3.7669e-05	4.51753e-05	0.000249739	0	0	0	6.1192e-05	0.000229449	0	0	0	0	0	0	0	5.41763e-05
Pavlova	0	0	0	0	0	0	0	0	0	0	0	0	0	0	0	0	0	0	0	0	0	0	0	0	0	0	0	0	0	0	0	0	0	0	0	0	0	0	0	0	0.000250308	0	0	0	0	0	0	0	2.70882e-05
Aestuariibaculum	6.45016e-05	3.07286e-05	0	0	9.78011e-05	0.000126028	0	6.51339e-05	4.79409e-05	0	0	7.00584e-05	7.85114e-05	0	7.25953e-05	0	0	0	4.21088e-05	3.58423e-05	0	0	0	0	1.92306e-05	2.81021e-05	2.75444e-05	0	3.55385e-05	4.85337e-05	0	5.62303e-05	2.60991e-05	5.65036e-05	0	4.54071e-05	0	5.37654e-05	2.20478e-05	3.0596e-05	0.000312885	0.00013114	0.000229986	0.00012924	3.79958e-05	9.35322e-05	0	2.82885e-05	5.41763e-05
Lactobacillus	0	0	5.49919e-05	0	0.000146702	0.000220549	0	0	0	0	0.000123778	0	3.14046e-05	0	2.90381e-05	0.000331134	0	0.000278354	0	0	0.000378629	0.000592539	0.00039052	0.000119121	0	0	0	0.000374789	0	0.000303335	0.000399361	0	0.000143545	5.65036e-05	4.51753e-05	0.000113518	0.000304824	0.000161296	0.000330717	0	0	2.01753e-05	0	0	8.8657e-05	9.35322e-05	0	4.24328e-05	0
Psychrosphaera	3.22508e-05	0	0	0	0	0	0	0	0	0	0	0	0	0	8.71143e-05	0	0	5.06098e-05	0	0	0	0	0	0.000142946	1.92306e-05	0	0	0	0	0	0	0	0	0	0	0	0	0	0	0	0	0	0	0	0	0	0	0	0
Candidatus_Kinetoplastibacterium	0	0.00010755	0	8.7867e-05	3.26004e-05	3.1507e-05	4.05647e-05	8.68451e-05	5.99262e-05	0.00021876	0.000185667	9.80818e-05	6.28091e-05	0.000129049	4.35572e-05	7.64156e-05	0	0.00010122	0	3.58423e-05	2.70449e-05	0	9.763e-05	0	1.92306e-05	0.000140511	4.13166e-05	0	0	2.42668e-05	0.00014976	0	6.52477e-05	3.7669e-05	3.01169e-05	0.000113518	5.0804e-05	0	2.20478e-05	9.1788e-05	0	4.03506e-05	6.89957e-05	5.74399e-05	6.33264e-05	0	0	5.65771e-05	5.41763e-05
Haemophilus	0	0	0	0	0	0	4.05647e-05	0	0	3.12515e-05	0	0	0	0	5.80762e-05	0	0	0	0	0	0	0	0	0	0	0	0	0	0	0	0	0	0	0	3.01169e-05	0	0	0	0	0	0	0.000141227	0	0	3.79958e-05	0.000374129	0	0	2.70882e-05
Scytonema	0	9.21857e-05	0	0	0.000146702	0	4.05647e-05	0	0	0	0	0	0	0	0	0	0	0	0	0	0	0	0	0	0	0.000196715	0	0	0	0	0	0	0	0	0	0	0	0	0	0	0	0	0	0	0	0	0	0	0
Phytophthora	0	0	0	7.32225e-05	6.52007e-05	6.3014e-05	4.05647e-05	4.34226e-05	3.59557e-05	0.00010938	0	0.000112093	0.000157023	0	5.80762e-05	0	0	0	0.000126326	0	0	0	0	0	0	0	0	0.00012493	3.55385e-05	3.64003e-05	4.99201e-05	0	0	0	0	0.000113518	5.0804e-05	0	0	0	0.000125154	0	0	0	0.000177314	0.000187064	5.17598e-05	0	0
Mesostigma	0	0	5.49919e-05	0	0	3.1507e-05	0	0	0	3.12515e-05	0.000433222	4.20351e-05	0.000109916	0	0	0	0	0	0	0	0	0	0	0	0	0	0	0	0	0	0	0	0	0	0	0	0	0	0	0	0.000104295	0	0	0	0	0.000327363	0	5.65771e-05	0
Kosmotoga	0	0	0	0	4.89006e-05	0	0.000121694	0	2.39705e-05	0	0	0	3.14046e-05	0	0	5.09437e-05	0	5.06098e-05	6.31632e-05	0	6.76123e-05	0	4.8815e-05	0	0	0	0	0	0	0	0	0	0	0.000113007	0	0	0	0	0	4.5894e-05	4.17179e-05	0	4.59971e-05	2.872e-05	0	0	0	0	2.70882e-05
Synedra	0	0	0	2.9289e-05	0	9.45209e-05	0	0	0	0	0	7.00584e-05	0	0	7.25953e-05	0	0	0	4.21088e-05	0	0	0	0	4.76485e-05	0	0	0	4.16432e-05	0	0	7.48802e-05	0	0	0	4.51753e-05	0.000295146	0	0	0	9.1788e-05	0.000166872	5.04383e-05	0	0	3.79958e-05	0	0	0	2.70882e-05
Fulvivirga	0	0	0	0	9.78011e-05	9.45209e-05	0.000141976	0.000108556	0.000119852	3.12515e-05	0.000216611	9.80818e-05	3.14046e-05	0	0	0.000127359	0	7.59148e-05	0	0	0	0.000154575	0	0	0	2.81021e-05	0	4.16432e-05	0	0	0	0	5.21982e-05	3.7669e-05	0	0	0	0	0	0	4.17179e-05	2.01753e-05	0	0	0	0	0	0	0
Blattabacterium	3.22508e-05	3.07286e-05	0	0	0	3.1507e-05	0	0	3.59557e-05	3.12515e-05	0	5.60467e-05	0	0	0	0	0	0	0	0	0	7.72877e-05	0	0	0	0	0	0	0	4.85337e-05	0	0	2.60991e-05	0	9.03506e-05	0	0	0	0	0	0	0	0	0	2.53306e-05	0	0	0	0
KD1_23	0	0	0	0.000380757	0	0	0	4.34226e-05	0	0	0	0	0	0	0	0	0	0	0	0	0	5.15251e-05	0	0	0	0	0	0	0	2.42668e-05	9.98403e-05	0	0	0	6.02337e-05	0	0	0.000107531	0	0	6.25769e-05	0	4.59971e-05	0	0	0	6.46998e-05	0	0
NS3a	0	0	0	4.39335e-05	0.000114101	6.3014e-05	0.000101412	0	0	0	0	2.80234e-05	0	0	0	7.64156e-05	0	0	0	0	0	0	0	0	0	0	0	0.000145751	0	0	4.99201e-05	0	9.13468e-05	0	0	0	5.0804e-05	0	0	0	0	0	0	2.872e-05	0.000113988	0	0	4.24328e-05	0.000135441
Paenirhodobacter	0	0	0	0	0	3.1507e-05	0	0	0	0	0	0	0	0	0	0	4.95479e-05	0	0	5.37634e-05	0	0	0	0	0	0	2.75444e-05	0	3.55385e-05	2.42668e-05	0	0	0	0	4.51753e-05	0	0	0	2.20478e-05	4.5894e-05	4.17179e-05	5.04383e-05	0.000206987	2.872e-05	8.8657e-05	0	5.17598e-05	7.07214e-05	2.70882e-05
Stackebrandtia	0.000129003	0	8.24878e-05	0	0	3.1507e-05	0	4.34226e-05	0	0	0	5.60467e-05	0	0	0	0	4.95479e-05	7.59148e-05	0.000147381	0.000197133	5.40899e-05	0	0	0	0	4.21532e-05	2.75444e-05	0	0.000124385	3.64003e-05	0	0.000262408	0	7.53381e-05	0.000165643	0	0	0.000107531	0.000110239	0	0	0	0	0	0	0	2.58799e-05	4.24328e-05	0
Pricia	0	0	5.49919e-05	0	0	0	0	0.000151979	0	0	0	2.80234e-05	0	0	5.80762e-05	0	0	0	0	3.58423e-05	5.40899e-05	0	0	7.14728e-05	0	2.81021e-05	0.000179039	4.16432e-05	0.000177692	0	0	0	0	0	0.000105409	0	0	0	4.40956e-05	0	4.17179e-05	0	4.59971e-05	0	0	9.35322e-05	2.58799e-05	0	5.41763e-05
Candidatus_Competibacter	0.000129003	0	0	0	0	0	0	0	0	0	0	4.20351e-05	0.000298343	0	0	0	9.90958e-05	0	0.000210544	0.000125448	0	0.00010305	0	4.76485e-05	1.92306e-05	7.02553e-05	5.50888e-05	0	5.33077e-05	2.42668e-05	0	7.49738e-05	2.60991e-05	3.7669e-05	3.01169e-05	0	7.6206e-05	0	4.40956e-05	0	0	0	0	0	2.53306e-05	0	0	2.82885e-05	0
HTCC2188_Group	3.22508e-05	0	8.24878e-05	0	3.26004e-05	0.000157535	0	4.34226e-05	0	7.81287e-05	0.000123778	0.000182152	7.85114e-05	0.000129049	0	0.000101887	0	0	4.21088e-05	0	0	5.15251e-05	0.000317298	0	0	0	0	8.32865e-05	3.55385e-05	0	0.000349441	5.62303e-05	0.000117446	0	3.01169e-05	0.000544885	5.0804e-05	3.58436e-05	7.71673e-05	0	8.34359e-05	0	0	0	2.53306e-05	0	0	4.24328e-05	0
Acidimicrobium	3.22508e-05	0	5.49919e-05	0	0	0	4.05647e-05	0	0	0	0	4.20351e-05	0	0	0	0.000101887	4.95479e-05	0	0	0	2.70449e-05	0.00010305	4.8815e-05	0	0	0	0	0	0	3.64003e-05	0	0	0	5.65036e-05	0	0	0.000101608	0	6.61434e-05	0	6.25769e-05	0	0	0	0	0	0	0	0
Nisaea	3.22508e-05	0	0	0	0	0	0	0	0	0	0.000154722	0	0	9.67867e-05	0	7.64156e-05	0	0.000177134	0	0	0.00010818	5.15251e-05	4.8815e-05	4.76485e-05	0	0	0	6.24649e-05	0	0	9.98403e-05	0	3.91486e-05	0	6.02337e-05	0.000136221	0.000177814	0	2.20478e-05	0	0	0	0	0	0	0	0	0	4.06322e-05
Mongoliicoccus	3.22508e-05	0	0	0	0	0	0	0	0	0	0	0	0	0	0	0	0	0	0	0	0	0	0	0	0	2.81021e-05	0	4.16432e-05	0	0	0	0	0	0	3.01169e-05	0	0	0	0	0	0.000104295	0	0.00016099	0	0.000202645	0	7.76398e-05	0	5.41763e-05
Chthoniobacter	0	0	0	0	6.52007e-05	0	4.05647e-05	0	0	0	0	0	0	0	0	0	0	0	0	0	0	0	0	0	0	0	0	0	0	0	0	0	0	0	0	0	0	0	0	0	0	0	0	0	0	0	2.58799e-05	0	0
Kitasatospora	0	0	0	0	0	3.1507e-05	8.11293e-05	0	0	0	0	0.000196164	7.85114e-05	0	0	0	0	0	0	5.37634e-05	0	0	0	4.76485e-05	0	0	0	0	0	0	0	0	0	0	0	4.54071e-05	0	0	0	0	0	0	0	0	0	0	2.58799e-05	0	0
Kriegella	0	6.14571e-05	0	0	6.52007e-05	4.72605e-05	0	0.000130268	0	3.12515e-05	0	0	0	0	0	0	0	0	0	0	0	0	0	0	0	8.43064e-05	0.000192811	0	0	0	0	0	0	0	0	0	0	5.37654e-05	0	0	0	0	0	0	0	0	0	5.65771e-05	0
Vermamoeba	0	0	0	0	0	0	4.05647e-05	0	0	0	0	2.80234e-05	0	0	0	0	0	0	0	0	0	0	7.32225e-05	0	0	0	0	0	0	0	7.48802e-05	0	0	0	0	0.00031785	0	0	2.20478e-05	0	8.34359e-05	0	4.59971e-05	0	5.06611e-05	0	2.58799e-05	0	2.70882e-05
Pseudonocardia	3.22508e-05	9.21857e-05	0	0	0	0	8.11293e-05	0	0	0	0	0.000294245	9.42137e-05	0	0	0	7.43218e-05	5.06098e-05	0.000357925	3.58423e-05	2.70449e-05	0.000231863	0	4.76485e-05	2.88459e-05	0	2.75444e-05	0	0.000159923	7.28005e-05	0	9.37172e-05	0	5.65036e-05	0.000105409	0	0	5.37654e-05	0.00025355	0	0	0	0	0	2.53306e-05	0	0	0	0
Pirellula	0.000290257	7.68214e-05	0.000384943	2.9289e-05	0	0	4.05647e-05	0	0	0	0	0.000294245	0.000266939	0	0	0.000178303	0	0.000227744	0.00033687	0.000268817	8.11348e-05	0.000618302	4.8815e-05	7.14728e-05	0.00016346	0.000154562	4.13166e-05	4.16432e-05	0.000124385	0.000218402	7.48802e-05	0.000468586	0	0.000113007	0.000421636	0	0.000304824	0.000125453	0.000617338	0	4.17179e-05	0	0	0	2.53306e-05	0	0.0001294	0	0
Iamia	0.000564389	0	0.00181473	4.39335e-05	0	0.000252056	0.000507058	4.34226e-05	0	3.12515e-05	0	0.00121902	0.00075371	0	0	0.000127359	0.000470705	0.00010122	0.00170541	0.00111111	0.000594989	0.000180338	0.000170853	0.00050031	1.92306e-05	2.81021e-05	0	0	0.000781847	0.00042467	0	0.00119958	0	0.000301352	0.000692688	4.54071e-05	0.00076206	0.000519732	0.000595291	0	6.25769e-05	0	0	0	0	0	0	0.000268741	0
Adhaeribacter	0.000354759	0	5.49919e-05	0	0	0	0	0	0	0	0	0.000112093	9.42137e-05	4.83933e-05	2.90381e-05	0	4.95479e-05	0	4.21088e-05	0	0	0.000360676	0	0	0	0	0	0	0.000231	2.42668e-05	0	0	0	3.7669e-05	0.000120467	6.81106e-05	0.000101608	0	2.20478e-05	0	4.17179e-05	0	0	0	0	0	0	0	0
Woodsholea	0.000112878	0.000307286	0.000467431	0	0	0	0.000141976	0.000694761	0	3.12515e-05	0	0.000140117	0.000219832	0	0	0	4.95479e-05	0.00010122	0.000273707	0.000232975	0.000311017	0.000128813	0	9.52971e-05	3.84612e-05	0.000210766	0	0.000166573	8.88462e-05	0.000400403	9.98403e-05	0.000506073	2.60991e-05	5.65036e-05	0.000783038	0.000249739	7.6206e-05	0.000125453	0.000628362	0	0	4.03506e-05	0	0	2.53306e-05	0	0.000245859	0.00019802	2.70882e-05
Draconibacterium	9.67523e-05	0	0	0	0	7.87674e-05	0	0	0	0	0	7.00584e-05	0.000266939	0	2.90381e-05	0	4.95479e-05	0	4.21088e-05	0	8.11348e-05	5.15251e-05	0	0	0	0	0	4.16432e-05	7.1077e-05	4.85337e-05	0	5.62303e-05	0	0	3.01169e-05	0	7.6206e-05	0	0.000121263	0	0	0	0	5.74399e-05	0	0	2.58799e-05	0	0
Solimonas	4.83762e-05	6.14571e-05	0	0	0	0	0	0	0	0	0	0	3.14046e-05	9.67867e-05	0	0	0	0	0	0.000143369	0	0	0	0	0	7.02553e-05	2.75444e-05	0	0	0	0	9.37172e-05	0	0	0.000557162	9.08141e-05	0	3.58436e-05	0	0	0	0	0	0	0	0	0	0	0
Fulvimarina	0.000129003	0	0.00013748	0	0	0	4.05647e-05	8.68451e-05	0	4.68772e-05	0	5.60467e-05	0.00020413	0	0.000101633	0	0.00012387	0	0.000147381	0.00016129	4.05674e-05	0	0	0.00016677	1.92306e-05	2.81021e-05	2.75444e-05	4.16432e-05	0.000124385	2.42668e-05	0	9.37172e-05	0	3.7669e-05	9.03506e-05	4.54071e-05	0.000152412	8.96089e-05	4.40956e-05	3.0596e-05	0	0	0	0	0	0	0.0001294	8.48656e-05	5.41763e-05
Rhodanobacter	0.000193505	0.000153643	0.000412439	0.00016109	0	9.45209e-05	6.0847e-05	0.000238824	3.59557e-05	0	0	0.000196164	0.000423962	0	5.80762e-05	0	0	5.06098e-05	0.000315816	0.000716846	5.40899e-05	0.000231863	4.8815e-05	7.14728e-05	0	0.000140511	0.000578433	0	0.000106615	0.000169868	0	0.00065602	0	0	0.00138538	4.54071e-05	5.0804e-05	0.000125453	0.000220478	0	0	0	0	0	2.53306e-05	0	0.00014234	0.000240453	0.000121897
Candidatus_Halobonum	0	0	5.49919e-05	0	0	0	0	0	0	0	0	0	0	0	0	0.000152831	0	0	0	0	9.46573e-05	5.15251e-05	0.000146445	0.000381188	0	0	0	0.00012493	0.000142154	8.49339e-05	0.00017472	5.62303e-05	0	0	0	0	0.00012701	5.37654e-05	0	0	0	0	0	0	0	0	0	0	0
Azospirillum	0.000177379	9.21857e-05	0.000164976	4.39335e-05	3.26004e-05	0.000141781	0.000121694	0	2.39705e-05	9.37544e-05	0.000371333	2.80234e-05	9.42137e-05	0.000258098	0	5.09437e-05	0	0	0	0.000179211	9.46573e-05	7.72877e-05	0.00019526	0.000142946	1.92306e-05	0.000154562	9.64055e-05	6.24649e-05	0.000231	9.70674e-05	9.98403e-05	0.000412356	5.21982e-05	7.53381e-05	0.00106915	0.000499478	0.000101608	0.000125453	0.000209454	0	0	4.03506e-05	0	4.30799e-05	2.53306e-05	0	0.00015528	0.000212164	5.41763e-05
SB_1_Group	0	7.68214e-05	0	0	0	0.000141781	0	0	0	0	0	0	0	0	0	0	0	0	0	0	2.70449e-05	0	0	0	0	0	0	4.16432e-05	0	2.42668e-05	9.98403e-05	3.74869e-05	0	0	0.000542103	0.000113518	0	7.16872e-05	7.71673e-05	0	0	0	0	0	0	0	0	0	0
Agitococcus	0	0	0	0	0	0	0	0	0	0	0	0	0	0	0	0	0	0	0	0	0	0	0	0	0	0	0	0	0	0	0	0	0	0	0	0	0	0	0	0	0	0	0	0	0	0	0	0	0
Methylibium	0	0	0	0	0	0	0	0	0	0	0	0	0	0.000548458	0	0	0	0	0	0	0	0	4.8815e-05	0	0	2.81021e-05	0	0	0	0	0.000299521	0	0	0	0.000165643	0.000522181	0	0	0	0	0.000229449	0	0.000137991	0	0	0	0	0	0
ph2	0	0	0	0	0	0	0	0	0	0	0.000247555	0	0	0	0	0	0	0	0	0	0	0	0	0	0	0	0	0	0	0	0	0	0	0	0	0	0	0	0	0	0	0	0	0	0	0	0	0	0
Alterococcus	0	0	0	0	0	0	0	0	0	0	0	0	0	0	0	5.09437e-05	0	0	0	0	0	0	9.763e-05	7.14728e-05	0	0	0	0	0	2.42668e-05	0	0	0	0	0	0	0	0	0	0	0	0	0	0	0	0	0	0	4.06322e-05
Methylophilaceae_Group	0	0.000261193	5.49919e-05	0.00016109	0	4.72605e-05	0	0	2.39705e-05	0.000156257	0	2.80234e-05	3.14046e-05	3.22622e-05	5.80762e-05	0	0	0.000126525	0	0	0	5.15251e-05	0	4.76485e-05	0	0.000112408	0	4.16432e-05	0	0	0	3.74869e-05	5.21982e-05	0	0	0	0	0	0	9.1788e-05	0.00020859	7.06136e-05	0	0	0	0	0	0	0.000230249
Poseidonocella	0	0	0	0	0	3.1507e-05	0	4.34226e-05	0	0	6.18888e-05	0	3.14046e-05	0	0	0	0	0	0	0.000107527	0	0	0	0	1.92306e-05	2.81021e-05	0	0	8.88462e-05	0	0	0	0	0	4.51753e-05	0	0	3.58436e-05	2.20478e-05	0	0	5.04383e-05	0	0	0	0	2.58799e-05	2.82885e-05	0
Algivirga	0	0	0	0	0	0	0	0	0	0	0	0	0	0	0	0	0	0	0	0	0	0	0	0	0	0	0	0	0	0	0	0	0	0	0	0	0	0	0	0	0	0	0	0	0	0	0	0	0
Haliangium	0	3.07286e-05	5.49919e-05	5.8578e-05	4.89006e-05	3.1507e-05	0	0	0	3.12515e-05	0	2.80234e-05	0	0.000129049	5.80762e-05	0	0	0	4.21088e-05	0	0.00010818	0	0	9.52971e-05	4.80765e-05	7.02553e-05	0	4.16432e-05	0	8.49339e-05	0	3.74869e-05	2.60991e-05	0.000113007	6.02337e-05	4.54071e-05	5.0804e-05	7.16872e-05	0	0	0	0	0	0	2.53306e-05	0	0	0	0
Microscilla	8.0627e-05	0	0	0	6.52007e-05	3.1507e-05	0.000101412	0	0	6.25029e-05	0	7.00584e-05	0	0	4.35572e-05	0	0	0	0	0	4.05674e-05	0.000231863	4.8815e-05	0	0	4.21532e-05	0	0	3.55385e-05	4.85337e-05	0	0	0	0	3.01169e-05	6.81106e-05	0	3.58436e-05	0	9.1788e-05	8.34359e-05	2.01753e-05	6.89957e-05	0	0	0	0	0	0.000108353
Brachyspiraceae_Group	0	0	0	0	0	0	0	0	0	0	0	0	0	0	0	0	0	0	0	3.58423e-05	0	0	0	0.000119121	0	0	0	0	0	0	0	0	0	0	0	0	0	0	0	0	8.34359e-05	0	0	0	0	0	0	0	0
Rubripirellula	4.83762e-05	4.60929e-05	5.49919e-05	2.9289e-05	0	0.000126028	0	8.68451e-05	0	0	0	2.80234e-05	0	0	0	0	0	5.06098e-05	0.000231598	8.96057e-05	0	5.15251e-05	0	0	1.92306e-05	9.83574e-05	2.75444e-05	0	0.000124385	4.85337e-05	0	0.000112461	2.60991e-05	3.7669e-05	3.01169e-05	0	7.6206e-05	0	6.61434e-05	3.0596e-05	0	2.01753e-05	0	0	0	0	0.000168219	0	4.06322e-05
0319_6G20_Group	9.67523e-05	0	0.000109984	0	0	3.1507e-05	0	0.000151979	0	0	0.000123778	0	0	4.83933e-05	0	0	4.95479e-05	0	0.000105272	0	0	0	0	0.000190594	0	0	0	0	7.1077e-05	0	9.98403e-05	3.74869e-05	0	0	0.000135526	0	0	0	9.92151e-05	3.0596e-05	0	0	0	0	0	0	0	0	0
Desulfococcus	3.22508e-05	3.07286e-05	0	0	0	0	4.05647e-05	4.34226e-05	0	0	0	0	6.28091e-05	0	0	0	0	0	0	3.58423e-05	4.05674e-05	7.72877e-05	0	9.52971e-05	0	0	0	0	0	0	0	9.37172e-05	0	0	0.000451753	4.54071e-05	0	3.58436e-05	3.30717e-05	0	0	0	0	0	0	9.35322e-05	7.76398e-05	5.65771e-05	0
Actinobaculum	4.83762e-05	6.14571e-05	0.000109984	0	0	0	8.11293e-05	0	0	0	0	5.60467e-05	0.000109916	0	2.90381e-05	0	0	0	0.000315816	0.000179211	0	0	0	0	0	4.21532e-05	2.75444e-05	0	0.000124385	2.42668e-05	4.99201e-05	7.49738e-05	2.60991e-05	0	0.000150584	4.54071e-05	0	3.58436e-05	0.000110239	0	0	0	0	0	0	0	0	2.82885e-05	0
Anditalea	0	3.07286e-05	0	0	0	0	0	0	0	0	0	0	0	0	0	0	0	0	0	0	0	0	0	0	0	0	0	0	0	0	0	3.74869e-05	3.91486e-05	0	0	4.54071e-05	0	0	2.20478e-05	0	0.000125154	0	0.000137991	5.74399e-05	0.000164649	0	0.00011646	0	0.000148985
S47_Group	0	0	5.49919e-05	0	0	0	0	0	0	0	0	0	3.14046e-05	0	0	0.000101887	4.95479e-05	0	0	5.37634e-05	0.000135225	0.00010305	0.00029289	0.000262067	0	0	0	0.000270681	0	0.000133468	4.99201e-05	3.74869e-05	0	0	0	0	5.0804e-05	5.37654e-05	8.81912e-05	0	0	0	0	0	0	0	0	0	0
Caenispirillum	0	4.60929e-05	5.49919e-05	0	0	0	0	0	0	0	0	0	0	0	0	0	0	0	0	0.000143369	6.76123e-05	0	0	0	0	2.81021e-05	0	0	0	3.64003e-05	0	7.49738e-05	0	0	0.000180701	0	0	0	0	0	0	0	0	0	0	0	0	0	0
Paenibacillus	0.000177379	0	8.24878e-05	0	0	0	0	4.34226e-05	0	0	6.18888e-05	5.60467e-05	0.000109916	0	0	0	4.95479e-05	5.06098e-05	6.31632e-05	0	5.40899e-05	5.15251e-05	0	0	0	0	0	0	0.000177692	0	4.99201e-05	0.000131204	0	0	7.52921e-05	0	5.0804e-05	8.96089e-05	5.51195e-05	0	0.000146013	2.01753e-05	0	0	2.53306e-05	0	0	0	0
Nitrosovibrio	0	0	0	0	0	0.000110274	0	0	0	0	0	0	0	0	0	0	4.95479e-05	0.000404879	0	0	0	0	0	0	0	0	0	4.16432e-05	5.33077e-05	0	0	0	0	0.000113007	3.01169e-05	0	0	0	0	0	0	0	0	0	0	0	0	0	0
Ectothiorhodospira	0	0	0	0	0	0	0	0	0	0	0	0	0	3.22622e-05	0	0	0	0	0	0	0	0	0	0	0	0	0	0.00012493	0	0	0.0001248	0	7.82973e-05	0	0	0.000363257	0	3.58436e-05	0	0	0	0	0	0	0	0	0	0	0
Muricola	3.22508e-05	0.00010755	0	0	0	0	4.05647e-05	0	0	0	0	2.80234e-05	9.42137e-05	0	2.90381e-05	0	0	0	0	0	2.70449e-05	0	0	0.000119121	0	4.21532e-05	6.8861e-05	0	3.55385e-05	0.000157734	0	9.37172e-05	0	0	0.000105409	6.81106e-05	5.0804e-05	0.000232983	2.20478e-05	0	0	0	0	0	0	0	0	0	0
Aurantimonadaceae_Group	3.22508e-05	0	0	0	0	0	0	0	0	0	0	5.60467e-05	0.000188427	0	2.90381e-05	0	0	0	4.21088e-05	7.16846e-05	0	0	0	0	0	0	2.75444e-05	0	0.000124385	0	0	0	0	0	0	0	0	0	2.20478e-05	0	0	0	0	0	0	0	0	0	0
Anderseniella	0	3.07286e-05	0	0	0	0	0	0	0	0	0	2.80234e-05	0	0	2.90381e-05	0	0	0	0	0.000215054	0	0	0	0	0	0	0	0	0	4.85337e-05	0	7.49738e-05	0	0	9.03506e-05	4.54071e-05	0	0.000125453	2.20478e-05	0	0	0	0	0	2.53306e-05	9.35322e-05	0.000284679	4.24328e-05	2.70882e-05
Cerasicoccus	0	0	0.000219968	0	0	6.3014e-05	0	0	0	0	0	0	0	3.22622e-05	0	0.000152831	0	0	0	0	8.11348e-05	0.000412201	0.00039052	0.00016677	0	0	0	0.000104108	0.000142154	0.000279069	0.000449281	0	2.60991e-05	0.00020718	0	0.000136221	0.000330226	3.58436e-05	5.51195e-05	0	0	0	0	0	0	0	0	0	0
BA059_Group	3.22508e-05	0	0	0	0	0	0	0	0	0	0	0	0	0	0	0	0	0	0	0	0	0	4.8815e-05	0	0	0	0	0	0	0	0.000424321	0	0	0	0.000165643	0.00115788	0	0	0	0	0	0	0	0	0	0	0	0	0
Lutimaribacter	0	4.60929e-05	0	0	0	0	0	6.51339e-05	0	0	0	0	0	0	4.35572e-05	0	4.95479e-05	0	4.21088e-05	7.16846e-05	0	0	0	0	1.92306e-05	0	0	4.16432e-05	0.000124385	0	0	3.74869e-05	0	0	6.02337e-05	0	0	0	0	0	0	0	0	0	5.06611e-05	0	2.58799e-05	2.82885e-05	2.70882e-05
Tatlockia	0	0	0	0	3.26004e-05	0	0	0	0	6.25029e-05	0	0	0	0	0	0	0	0	6.31632e-05	0	0	0	0	0	0	0	0	0	0	0	0	7.49738e-05	0	0	0	0	0	3.58436e-05	0	0	0	0	0	0	2.53306e-05	0	0	0	0
Cesiribacter	0	0	0	0	0	0	0	0	0	0	0	0	0	0	0	0	0	0	0	0	0	0	0	0	0	0	0	0	0	0	0	0	0	0	0	0	0	0	0	0	0.000271167	0	0	0	0	0	0	0	0
Sunxiuqinia	0	0	0	0	0	0	0	0	0	0	0	0	0	0	0	0	0	0	0	0	0	0	0	0	0	0	0	0	0	0	0	0	0	0	0.000301169	0	0	0	0	0	0	0	0	0	0	0	0	0	0
Tyzzerella	0	0	0	0	0	0	0	0	0	0	0	0	0	0	0	0	0	0	0	0	0	0	0	0	0	0	0	0	0	0	0	0	0	0	0	0	0	0	0	0	0	0	0	0	0.000126653	0	0.000271739	0.000452617	0
Methylocaldum	0	0	8.24878e-05	0	0	0	0	0	0	0	0	0	0	0	0	0	0	0	0	0	0	0.00010305	0	0	0	0	0	0	0	0	0	0	0	3.7669e-05	0	4.54071e-05	0	0	0	0	0	0	4.59971e-05	0	5.06611e-05	0	2.58799e-05	0	0
Pannonibacter	8.0627e-05	0	0	0	0	0	0	0	0	0	0	5.60467e-05	0	0	0	0	0	0	0	7.16846e-05	0	0	0	0	0	0	0	0	0	2.42668e-05	0	0.000243665	0	0	7.52921e-05	4.54071e-05	5.0804e-05	8.96089e-05	4.40956e-05	0	0	0	0	2.872e-05	0	0	2.58799e-05	0	0
Aeromonadaceae_Group	0	0	0	5.8578e-05	0.000342304	0	0	0	0.000119852	3.12515e-05	0	0	0	0.000338753	2.90381e-05	0	0	0	0	0	0	0	4.8815e-05	0	0	0	0	4.16432e-05	0	0	0.0001248	0	9.13468e-05	0	0	0.000227035	0	0	0	6.1192e-05	0	0.000100877	0	0	0.000265971	0	0	0	2.70882e-05
Pseudopelagicola	0	3.07286e-05	0	2.9289e-05	0	4.72605e-05	0	0	0	7.81287e-05	9.28333e-05	0	4.71069e-05	0	0	0	0	0	0	0.00016129	0	0	0	0	0	4.21532e-05	0	0	0	0	0	0	0	0	0	0	0	0	0	6.1192e-05	0	0.000121052	0	0	2.53306e-05	0	5.17598e-05	0	0
Ponticoccus	0	4.60929e-05	0	0.000131801	0	3.1507e-05	8.11293e-05	0	0.000131838	0.000187509	6.18888e-05	0	3.14046e-05	0	0	0	0	5.06098e-05	0	5.37634e-05	0	0	0	0	0	0	0	0	0	0	0	0	2.60991e-05	0	0	0	0	5.37654e-05	3.30717e-05	7.649e-05	0	5.04383e-05	0	4.30799e-05	5.06611e-05	0	6.46998e-05	2.82885e-05	6.77204e-05
Ramlibacter	3.22508e-05	0	0	0.000380757	0	0	0	4.34226e-05	0	0	0	0	0	0.000161311	0	0	0	5.06098e-05	0	5.37634e-05	0	0	0	0	0	0	0	0	0	0	4.99201e-05	0	0	0	0	0.000227035	0	3.58436e-05	0	0	4.17179e-05	0	0	0	2.53306e-05	0	0	2.82885e-05	0
Cronobacter	0	0	0	0	3.26004e-05	0	0	0	0	0	0	0	0	0.000193573	0	0	0	0	0	0	0	0	0	0	0	0	0	4.16432e-05	0	0	0.00014976	0	2.60991e-05	0	0	9.08141e-05	0	0	0	0	0	0	9.19942e-05	0	3.79958e-05	0	0	0	0.000135441
Celerinatantimonas	0	0	5.49919e-05	0	0	0	0	0	0	0	0	0	0	0	0	0	0	0	0.000105272	0	0	0	0	0	0	0	0	0	0	0	0	0	0	0	0	0	0	0	0.000132287	0	0	0	0	0	0	0	0	0	0
Desulfotomaculum	0	0.00010755	5.49919e-05	2.9289e-05	3.26004e-05	3.1507e-05	8.11293e-05	0	0	0	0	2.80234e-05	3.14046e-05	3.22622e-05	5.80762e-05	7.64156e-05	0	0	8.42176e-05	0.000107527	2.70449e-05	5.15251e-05	0	0	0	0.000154562	2.75444e-05	6.24649e-05	0	0	0	3.74869e-05	2.60991e-05	0	0.000105409	0	5.0804e-05	7.16872e-05	2.20478e-05	0	0	0	0	0	0	0.000140298	3.88199e-05	0	0
Rhodovibrio	0	0	5.49919e-05	0	0	4.72605e-05	0	0	0	0	0	0	0	3.22622e-05	0	0	7.43218e-05	0	0.000126326	0	2.70449e-05	0	4.8815e-05	0	0	2.81021e-05	0	0	5.33077e-05	0	0	0	0	0	0	6.81106e-05	0	0	2.20478e-05	0	0	0	0	0	0	0	0	0	0
Litorimonas	0	0	0	0	0	0.000189042	0	0	0	0	0	0	0	0	0	0	0	0	0	0	0	0	0	0	0	0	0	0	0	0	0	0	0	0	0	0	0	0	0	0	0	0	0	0	0	0	0	0	0
E8	0	0	0	0	0	9.45209e-05	0	0	0	0	0	0	0	0	0	0	0	0	0	0	0	0	0	0	0.000442303	0	0	0	0	0	0	0	0	0	0	0	0	0	0	0	0	0	0	0	0	0	0	0	0
Kaistia	0	3.07286e-05	0	0	0	0	0	0	0	0	0.000123778	0	0	0	0	0	4.95479e-05	0	0	3.58423e-05	0	0	0	0	0	0	2.75444e-05	0	0	2.42668e-05	0	7.49738e-05	0	0	0	0	0	0	0	0	0	0	0	0	0	0	6.46998e-05	8.48656e-05	0
Thermoanaerobacter	0	4.60929e-05	5.49919e-05	0	0	0	4.05647e-05	0	0	0	0	4.20351e-05	0.000141321	0	0	0	4.95479e-05	5.06098e-05	6.31632e-05	0.000143369	0	0	0	4.76485e-05	0	0	0.000165266	0	0	0	0	5.62303e-05	0	0	0.000165643	0	0	3.58436e-05	2.20478e-05	0	0	0	0	0	0	0	2.58799e-05	4.24328e-05	0
mb2424_Group	6.45016e-05	6.14571e-05	0.000357447	0	0	0	0	0	2.39705e-05	0	0.000123778	0.000224187	0	0	0	0	0	0	6.31632e-05	0.000179211	4.05674e-05	5.15251e-05	0	0.00016677	0	2.81021e-05	0	6.24649e-05	0.000177692	9.70674e-05	0.000224641	0.000449843	0	0	0.000828213	0	0.000101608	8.96089e-05	0.000275597	0	0	0	0	0	0	0	0	0	0
Nocardioidaceae_Group	3.22508e-05	0	5.49919e-05	0	0	0	4.05647e-05	0	0	0	0	7.00584e-05	7.85114e-05	0	2.90381e-05	0	0	0	6.31632e-05	3.58423e-05	0	0	0	0	0	7.02553e-05	6.8861e-05	0	5.33077e-05	0	0	3.74869e-05	0	3.7669e-05	0	0	5.0804e-05	0	0.000132287	0	0	0	0	0	0	0	0	0	0
Dermatophilaceae_Group	3.22508e-05	0	0.000164976	0	0	0	0	0	0	0	0	8.40701e-05	7.85114e-05	0	0	0	0	0	8.42176e-05	0.00016129	0	0	0	0	0	0	0	0	0.000159923	2.42668e-05	0	0.000187434	0	0	0.000180701	0	7.6206e-05	7.16872e-05	4.40956e-05	0	0	0	0	0	0	0	0	0	0
Salinarimonas	3.22508e-05	4.60929e-05	0	0	0	0	0	4.34226e-05	0	0	0	4.20351e-05	0	3.22622e-05	0	0	0	0	0	7.16846e-05	0	0	0	0	0	9.83574e-05	0	0.000187395	5.33077e-05	0	0.000374401	3.74869e-05	0.000104396	0	3.01169e-05	0.000544885	0	0	3.30717e-05	3.0596e-05	0.000104295	0	0.000114993	2.872e-05	0	0	0.000168219	0.000226308	5.41763e-05
Candidatus_Amphibiichlamydia	0	0	0	0	0	0	0	0	0	0	0	2.80234e-05	0	0	0	7.64156e-05	0	0	0.000126326	0	0	0	0	0	0	0	0	4.16432e-05	5.33077e-05	3.64003e-05	4.99201e-05	0	6.52477e-05	0	0	0	0	0	0	0	0	0	0	0	0	0	0	0	0
Arthrobacter	4.83762e-05	0	0.000109984	0	0	0	4.05647e-05	4.34226e-05	0	0	0	0.000210175	0.000282641	0	5.80762e-05	0	0	0	0.000273707	0.000179211	0	0.000128813	0	9.52971e-05	0	4.21532e-05	0	0	0.000142154	2.42668e-05	0	0.000224921	0	5.65036e-05	0.000120467	0	0	7.16872e-05	0.000110239	0	0	0	0	0	0	0	0	2.82885e-05	0
Carica	4.83762e-05	0	0	0	0	0	0	0	0	0	0	0	3.14046e-05	0	5.80762e-05	0	0	5.06098e-05	0	0	5.40899e-05	0	0	0	0	0	0	0	0	0.000145601	0	0	0	0	0	0	0	0	0.000110239	0	0.000104295	2.01753e-05	0	0	3.79958e-05	0	0	2.82885e-05	0
Methanomethylovorans	0	0	0	0	0	0	0	0	0	0	0	0	0	0	0	0	0	0	0	0	0	0	0	4.76485e-05	0	0	0	0	0	0	0	0.000356125	0	0	9.03506e-05	0	0	0	0	0	0	0	0	0	0	0	0	0	0
Zea	0	0	0	0	0	0	0	4.34226e-05	0.000107867	0	0	0	0	0	2.90381e-05	0	0	0	6.31632e-05	0	0.00016227	5.15251e-05	0	0.000119121	0	0	0	0	0	0.000121334	0	0	0	3.7669e-05	0	0	0	3.58436e-05	9.92151e-05	0	0	0	0	0	0	0	0	0	0
AKIW874_Group	0.00020963	7.68214e-05	0.000577415	0	0	0	0	0	0	0	0	0.000182152	4.71069e-05	0	2.90381e-05	0	0.00012387	0	0.000357925	0.000250896	0.00010818	5.15251e-05	0	4.76485e-05	0	0	0	0	0.000142154	7.28005e-05	0	0.000149948	0	3.7669e-05	0.000271052	9.08141e-05	0.000203216	0.000179218	0.000121263	0	0	0	0	0	0	0	0	0	0
Dongia	0	6.14571e-05	0	0	0	0	0	0	0	0	0	0	0	8.06556e-05	0	0	0.00012387	0	0	7.16846e-05	0	0	0	4.76485e-05	0	0	0	0	0	4.85337e-05	4.99201e-05	0	7.82973e-05	5.65036e-05	9.03506e-05	4.54071e-05	0.00025402	0	0	0	0	0	0	0	0	0	0	0	4.06322e-05
SJA_101_Group	6.45016e-05	0	0	5.8578e-05	0	0	0	0	0	6.25029e-05	0.000123778	0	0	0	0	0	4.95479e-05	0	0	0	0	0	4.8815e-05	4.76485e-05	0	0	0	0	0	6.06671e-05	0	3.74869e-05	0	0	9.03506e-05	0	0	0	0	0	0	0	0	0	3.79958e-05	0	0	0	0
Fusibacter	0	7.68214e-05	0	0	0	0	0	0	0	0	0	5.60467e-05	0	0	0	5.09437e-05	0	0	0	3.58423e-05	0	0	0	9.52971e-05	0	2.81021e-05	0	4.16432e-05	0	0	0	9.37172e-05	0	0	0.000722804	0	0	0	0	0	0	0	0	0	0	0	0	0	0
Methanogenium	0	0	0	0	0	0	0	0	0	0	6.18888e-05	0	0	0	0	0	0	0	0	0	0	0	0	0	0	0	0	0	0	0	0	0.000524816	0	0	0.000451753	0	0	0	3.30717e-05	0	0	0	0	0	0	0	0	0	0
Alkaliphilus	0	0	0.00013748	0	0	0	0	4.34226e-05	0	0	0	0	0	0	0	0	0	0	0	3.58423e-05	0	0	0	0	0	5.62042e-05	0	0	0	2.42668e-05	0	3.74869e-05	0	0	0.000391519	0	0	0.000179218	0	0	6.25769e-05	0	0	0	0	0	0	0	0
Litorilituus	0	0	0	0	0	0	0	0	0	0	0	0	0	0	0	5.09437e-05	0	0	0	0	0	0	4.8815e-05	0	0	0	0	0	0	0	4.99201e-05	0	0	0	0	0.000158925	0	0	0	0	0	7.06136e-05	0	0	0.000151983	0	0	0	2.70882e-05
Desulfobacter	0	3.07286e-05	5.49919e-05	0	0	0	0	0	0	0	0	0	0	0	0	7.64156e-05	0	0	0	0	0	0	0	7.14728e-05	0	2.81021e-05	0	0.000208216	0	0	4.99201e-05	3.74869e-05	5.21982e-05	0	0.000255993	9.08141e-05	0	0	0	0	0	0	0	0	6.33264e-05	0	0	0	0
Shuttleworthia	0	0	0	0	0	0	0	0	0	0	0	0	0	0	0	0	0	0	0	0	0	0	0	0	0	0	2.75444e-05	0	0	0	0	0	0	0	0	6.81106e-05	0	0	0	0	0	0	0	0	0.000151983	0	7.76398e-05	0.000141443	0
Marinifilum	0	0	0	0	3.26004e-05	3.1507e-05	0	4.34226e-05	0	0	0	2.80234e-05	9.42137e-05	0	0	0	0	0	0	3.58423e-05	0	0.000128813	0	0	0	0	0	0.000291503	3.55385e-05	0	0	0	9.13468e-05	0	0	0	0	3.58436e-05	0	0	4.17179e-05	0	0	0	0	0	0	0	0
Marvinbryantia	0	0	0	0	0	0	0	0	0	0	0	0	0	0	0	0	0	0	0	0	0	0	0	0	0	0	0	0	0	0	0	0	0	0	3.01169e-05	0	0	0	0	0	0	0	0	0	0.000265971	0	0.000271739	0.000325318	0
Paramoritella	3.22508e-05	0	0	0	4.89006e-05	0	0	0	0	3.12515e-05	0	0	0	8.06556e-05	0	0	0	0	0	0	0	0	7.32225e-05	0	2.88459e-05	0	0	0	0	0	4.99201e-05	0	2.60991e-05	0	0	6.81106e-05	0	0	0	0	0.000104295	7.06136e-05	0	0	7.59917e-05	0	0	0	0
marine	0	9.21857e-05	0	0	0	6.3014e-05	4.05647e-05	8.68451e-05	0	0	0	0	0	0	2.90381e-05	0	0	0	0	0	0	0	0	0	2.88459e-05	0.000140511	2.75444e-05	4.16432e-05	0	2.42668e-05	0	7.49738e-05	0	0	0	0	5.0804e-05	0	0	6.1192e-05	0	0	4.59971e-05	0	0	9.35322e-05	0	0	5.41763e-05
Chthoniobacteraceae_Group	0	0	0	0	0	0.000126028	0	0	0	3.12515e-05	0	0	3.14046e-05	0	0	0	0	0	0	0	0	0	0	0	0	2.81021e-05	0	0	0	0	0	0	0	0	0	0	0	0	0	0	0	0	0	0	0	0	3.88199e-05	0	0
CL500_3	0.000129003	0	0.00013748	7.32225e-05	6.52007e-05	0	0	0.000260535	0	7.81287e-05	0	0.000154129	3.14046e-05	3.22622e-05	4.35572e-05	0	4.95479e-05	0.000126525	0.000315816	0.000322581	0.00010818	0	0	0	2.88459e-05	2.81021e-05	2.75444e-05	0	3.55385e-05	0	0	5.62303e-05	0	7.53381e-05	3.01169e-05	4.54071e-05	7.6206e-05	0.000107531	6.61434e-05	0	0.000146013	0	0	0	6.33264e-05	0	9.05797e-05	8.48656e-05	6.77204e-05
Bigelowiella	0	0	0	2.9289e-05	0	7.87674e-05	0	0	0	3.12515e-05	0	4.20351e-05	3.14046e-05	0	0	0	0	0	0	0	0	5.15251e-05	0	0	0	0	0	0	0	0	0	9.37172e-05	0	0	4.51753e-05	0	0	0	0	4.5894e-05	0	0	0	0	7.59917e-05	0	2.58799e-05	0	0
Botrychium	0	0	0	0	0	0	4.05647e-05	0	0	0	0	0	0	0	0	0	0	0	0	0	0	0	0	0	0	0	0	0	0	0	0	0	0	0	0	0	0	0	0	0	0.000229449	0	0	0	0	0	0	0	0
Pseudotsuga	0	0	0	4.39335e-05	6.52007e-05	9.45209e-05	8.11293e-05	4.34226e-05	7.19114e-05	0.000156257	0	0	7.85114e-05	0	0	0	0	0	0	0	0	0	0	0	0	0	0	0	0	0	4.99201e-05	0	0	0	0	0	0	0	0	0	0	0	0	0	0.000139318	0	2.58799e-05	0	0
LD19_Group	0	0	0	7.32225e-05	8.15009e-05	0.000173288	6.0847e-05	0	5.99262e-05	9.37544e-05	0	0	0	0	0	0	0	0	0	0	0	0	0	0	0	0	0	0	0	0	0	0	0	0	0	0	0	0	0	0	0	0	0	0	0	0	0	0	0
Halothiobacillaceae_Group	0	0	0	0	0	0	0	0	0	0	0	0	0	0	0	0	0	0	0	7.16846e-05	0	5.15251e-05	0	0	0	0	0	0	0	0	9.98403e-05	0	0	0	3.01169e-05	4.54071e-05	0	3.58436e-05	2.20478e-05	0	0	0.000110964	0	0	0	0	0	2.82885e-05	0
Fontimonas	0	3.07286e-05	5.49919e-05	4.39335e-05	0	0	0	0	0	0	6.18888e-05	0	0	0.00014518	0	0	0	0	0	3.58423e-05	0	5.15251e-05	4.8815e-05	0	0	4.21532e-05	0	0	0	2.42668e-05	4.99201e-05	0.000224921	0	0	0.000331285	0.000295146	0	0	0	0	0	0	6.89957e-05	5.74399e-05	2.53306e-05	0	0	0	0
Siansivirga	0	0.00010755	0	0	3.26004e-05	4.72605e-05	0	0	3.59557e-05	0	0	8.40701e-05	4.71069e-05	0	0	0	0	0	4.21088e-05	0	0	0	0	0	0	0	4.13166e-05	4.16432e-05	0	0	0	0	0	0	3.01169e-05	0	0	0	0	0	0	4.03506e-05	0	2.872e-05	0	0	0	0	2.70882e-05
Labrys	0	0	5.49919e-05	4.39335e-05	0	0	0	0	0	3.12515e-05	0	2.80234e-05	0	6.45245e-05	0	0	0	0	4.21088e-05	3.58423e-05	2.70449e-05	0	0	4.76485e-05	0	5.62042e-05	0	0	0	2.42668e-05	7.48802e-05	0.000112461	0	0	0.000150584	0.000158925	0	5.37654e-05	2.20478e-05	0	0.00039632	0	0	0	0	0	0	4.24328e-05	0
Yeosuana	0	0	0	0	0	0	0	0	0	0	0	0	0	0	0	0	0	0	0	0	0	0	0	0	0	0	0	0	3.55385e-05	0	0	0	0	0	0	0	0	0	0	0	0	0	0.000114993	0	0	0	0	0	0
Luedemannella	3.22508e-05	3.07286e-05	5.49919e-05	0	0	0	0	0	0	0	0	0	3.14046e-05	0	2.90381e-05	0	0	0	6.31632e-05	8.96057e-05	0	0	0	0	0	2.81021e-05	0	0	0.000142154	0	0	9.37172e-05	0	0	0.000165643	0	7.6206e-05	7.16872e-05	0.000110239	0	0	0	0	0	0	0	0	0	0
Tistrella	8.0627e-05	3.07286e-05	0	0	0	0	0	0	0	0	0	4.20351e-05	0	3.22622e-05	4.35572e-05	0	0	0.00010122	0	8.96057e-05	0	7.72877e-05	4.8815e-05	4.76485e-05	2.88459e-05	0	0	0.00012493	5.33077e-05	4.85337e-05	0.000224641	3.74869e-05	2.60991e-05	3.7669e-05	3.01169e-05	9.08141e-05	5.0804e-05	0	3.30717e-05	0	0	0	0	0	0	0	0.00014234	2.82885e-05	2.70882e-05
Croceitalea	0	0	0	0	0	0	0	0	0	0	0	0	0	0	0	0	0	0	0	0	0	0	0	0	0	2.81021e-05	0	0	3.55385e-05	0	0	0	0	0	3.01169e-05	0	0	0	0	0	0	0	4.59971e-05	0	0	0	0	0	0
Desulforhopalus	0	0	5.49919e-05	0	0	0.000504112	4.05647e-05	0	0	0	0	0	0	0	0	0	0	0	0	0	0	0	0	4.76485e-05	1.92306e-05	0	0	0	0	0	0	0	0	0	0.000271052	0	0	0	0	0	0	3.0263e-05	0	0	0	0	0	4.24328e-05	0
Telmatospirillum	0	3.07286e-05	0	0	0.000114101	0	0	0	0	3.12515e-05	6.18888e-05	0	0	0.000112918	0	7.64156e-05	0	0	0	0	2.70449e-05	0	0.000122038	0	0	0	0	0.000249859	0	9.70674e-05	0.000199681	0	0.000208793	0	0.000225876	0.000340553	0	7.16872e-05	0	0	0	0	0	0	0	0	0	0	0
Mycetocola	0	0	0	0	0	0	4.05647e-05	0	3.59557e-05	0	0	0.000448374	0.000141321	0	0	0	4.95479e-05	0	0	0.000179211	0	0	0	0	0	2.81021e-05	0	0	0	0	0	0	0	0	4.51753e-05	4.54071e-05	0	8.96089e-05	2.20478e-05	0	0	0	0	0	0	0	2.58799e-05	8.48656e-05	4.06322e-05
Schleiferia	0.000112878	0	0	0	3.26004e-05	0.000110274	4.05647e-05	0	0	0	0	0	0.000141321	0	0	5.09437e-05	0	0	0	0	0	0	0	0	0	0	0	0	3.55385e-05	0	0	0	0	0	3.01169e-05	0	0	0	5.51195e-05	0	0	0	0	0	0	0	0	0	0
Hydrocarboniphaga	4.83762e-05	0	0	0	0	0	0	0	0	3.12515e-05	0	0	0	0	0	0	0	0	4.21088e-05	5.37634e-05	0	0.000180338	0	0	0	0	0	0	5.33077e-05	0	4.99201e-05	0	0	0	0	6.81106e-05	0	0	0	0	0	0	0	4.30799e-05	0	0	0	0	0
Virgisporangium	8.0627e-05	0	5.49919e-05	0	0	0	0	0	0	0	0	0	0	0	0	0	0	0	0	0.000107527	2.70449e-05	0	0	0	0	0	0	0	0.000159923	0	0	0.000318638	0	0	0.000135526	0	7.6206e-05	0	8.81912e-05	0	0	0	0	0	0	0	0	0	0
Candidatus_Xenohaliotis	0	0	0	0	0	0	0	0	0	0	0	0	0	0	0	0	0	0	0	0	0	0	0	0	0	0	0	0	0	0	0	0	0	0	3.01169e-05	0	0	0	0	0	0	0	0	0	0.000139318	0	0	0	2.70882e-05
Citreimonas	0	3.07286e-05	0	0	0	0	8.11293e-05	0	0	0	0	0	0	0	4.35572e-05	0	0	0	0	8.96057e-05	4.05674e-05	0	0	0	0	0	0	0	5.33077e-05	2.42668e-05	0	0	0	0	0	0	0	0	7.71673e-05	0	0	0	0	0	3.79958e-05	0	0	5.65771e-05	0
Brevibacillus	0	0	0	0	0	0	0	0	0	0	0	0	0	0	0	0	0	0	0	0	0	0	0	7.14728e-05	0	0	0	0	0	0	0	0	0	0	0	0	0	5.37654e-05	2.20478e-05	0	0	0	0	0	0	0	0	0	0
AKYG587	0	0	0.000192472	0	0	0	0	0	0	0	0	0	0	0	0	0	0.000173418	0.000126525	0	0	0.000148747	0.00010305	0.000146445	7.14728e-05	0	0	0	4.16432e-05	0	4.85337e-05	4.99201e-05	0	3.91486e-05	0	4.51753e-05	0	0.000203216	5.37654e-05	4.40956e-05	0	0	0	0	0	0	0	0	0	0
Sporocytophaga	0	0	0	0	0	0	0	4.34226e-05	0	0	0	0	0	0	0	0	0	0	0	8.96057e-05	0	0	0	4.76485e-05	0	0	0	0	3.55385e-05	0	0	0	0	0	0	0	0	0	0	0	0	0	0	0	0	0	0	0	0
Spirochaeta	0	0.000169007	0.000164976	0.000278246	3.26004e-05	6.3014e-05	8.11293e-05	0	4.79409e-05	7.81287e-05	0.000371333	0.00016814	6.28091e-05	0	0	0.000280191	0	0	4.21088e-05	5.37634e-05	0.000297494	0.000206101	0.000439335	9.52971e-05	1.92306e-05	7.02553e-05	4.13166e-05	0.000853686	5.33077e-05	0.000218402	0.000524161	9.37172e-05	0.000130495	0	3.01169e-05	4.54071e-05	5.0804e-05	0	0.000132287	0	0	0	0	0	0	0	0	0	0
Roseospira	0	0	0	0	0	0	0	0	0	0	0	0	0	0.00014518	0	0	0	0	0	0	0	0	0	0	0	0	0	0	0	0	0	0	7.82973e-05	0	0	0.000340553	0	0	0	0	0	0	0	0	0	0	0	0	0
Wolinella	0	0	0	0	0	0	0	0	0	0	0	0	0	0	0	0	0	0	0	0	0	0	0	0	0	0	0	0	0	0	0	0	0	0	0	0	0	0	0	0	0	0	0	0	0.000139318	0	9.05797e-05	2.82885e-05	0
Methanosaeta	0	3.07286e-05	0	0	0	0	0	0	0	0	0	0	0	0	0	0	0	0	0	0	0	0	4.8815e-05	0	0	0	0	0	0	0	0	0.000243665	0	0	0.00019576	0	0	0	0	0	0	0	0	0	0	0	0	0	0
pt46	0	0.000169007	0	0	0	0	0	0	0	0	0	0	0	0	0	0	0	0	0	0	0	0	0	0	0	9.83574e-05	0	0	0	0	0	0	0	0	0	0	0	0	0	0	0	0	0	0	0	0	0	0	0
Bilophila	0	0	0	0	0	0	0	0	0	0	0	0	0	0	0.000145191	0	0	0	0.00033687	0	0	0	0	0	0	0	0	0	0	0	0	0	0	0	0	0	0	0	0	0	0	0	0	0	0	0	2.58799e-05	0	0
Truepera	0	0	0	0	0	0	0	4.34226e-05	0	0	0	0	0	0	0	0	0	0	4.21088e-05	0	8.11348e-05	0	0	0	0	0	0	0	0	8.49339e-05	0	0	0	0	0.000120467	0.000454071	0	8.96089e-05	0	0	4.17179e-05	0	0	0	0	0	0	0	0
Carboxylicivirga	0	0	0	0	0	0	0	0	0	0	0	2.80234e-05	0	0	0	0	0	0	0	0	0	5.15251e-05	0	0	0	0	0	0	0	0	0	0	0	0	0	0	0	0	0	0	0	0	0	0	0	0	0	0	0
Kordiimonas	0	0	5.49919e-05	0	6.52007e-05	0	0	0	4.79409e-05	3.12515e-05	9.28333e-05	0	0	0	5.80762e-05	0	0.00012387	5.06098e-05	0	0	0	0	0	7.14728e-05	1.92306e-05	0	0	8.32865e-05	0	0	0	0	0.000117446	0	9.03506e-05	4.54071e-05	0	0	0	0	0.000938654	4.03506e-05	9.19942e-05	0	0	0	0	0	0
Enterovibrio	0	0	0	0	8.15009e-05	0	0	0	0	0	6.18888e-05	0	0	0	0.000116152	0	0	0	0.000126326	0	0	0	0	0	0.000192306	0	5.50888e-05	0	0	2.42668e-05	0	0	0	0	0	0	0	0	0	0	0	0	0	0	0	0	0	0	0
Saprolegnia	0	0	0	8.7867e-05	0.000130401	0	0	0	0	6.25029e-05	0	0	7.85114e-05	0	0	7.64156e-05	0	0	8.42176e-05	0	2.70449e-05	0.00010305	7.32225e-05	0	0	0	0	4.16432e-05	0	0	0	0	5.21982e-05	0	0	6.81106e-05	0	0	0	6.1192e-05	8.34359e-05	0	0	7.17999e-05	0.000126653	0	3.88199e-05	0	0
Spirochaetaceae_Group	0	0	0	0	3.26004e-05	0	6.0847e-05	0	0	3.12515e-05	0.000247555	0.000126105	0.000282641	0	0	0	0	0	0	0	0	0	0	0	0	0	0	0	0	6.06671e-05	0.000199681	0	0	3.7669e-05	0	9.08141e-05	0	3.58436e-05	0	0	0	0	0	0	0	9.35322e-05	0	0	0
Filimonas	0	0	0	0.000190379	0	3.1507e-05	0	0	2.39705e-05	0	0	0	0	0	0	0	0	0	0	0	0	0	0	0	0	4.21532e-05	0	0	0	0	0	3.74869e-05	0	0	0	0	0	0	2.20478e-05	0	0	0	0	0	0	0	0	0	0
TS34	0	6.14571e-05	0	7.32225e-05	0	0	0	0	0	4.68772e-05	0	0	7.85114e-05	0.000161311	0	0	0	5.06098e-05	0	3.58423e-05	0	0	0	0	2.88459e-05	7.02553e-05	2.75444e-05	4.16432e-05	0	0	0.000224641	0	0	3.7669e-05	4.51753e-05	0.00038596	0	3.58436e-05	0	0	0	0	0	0	3.79958e-05	0	3.88199e-05	2.82885e-05	0
Giesbergeria	4.83762e-05	0	5.49919e-05	0.000117156	0	0	0	0	0	0	0	0	0	0	0	0	0	0	0	0.000197133	0	0.00010305	0	0	0	4.21532e-05	0	0	0	0	0.0001248	0	0	0	7.52921e-05	6.81106e-05	0	7.16872e-05	3.30717e-05	0	0	0	4.59971e-05	0	5.06611e-05	0	0.0001294	0	0.000121897
Alcaligenaceae_Group	0	3.07286e-05	0	0.000322179	0	3.1507e-05	0	6.51339e-05	0	0	0	0	0	6.45245e-05	0	0	0	0	0	5.37634e-05	2.70449e-05	0	0	0	0	0	0	0	0	0	4.99201e-05	0	0	0	0	9.08141e-05	0	0	0	0	4.17179e-05	0	0	0	6.33264e-05	0	0	0	5.41763e-05
Rivicola	0	0	0	2.9289e-05	0	0	0	0	0	0	0	0	0	0	0	0	0	0	0	0	0	0	0	0	0	0	0	0	0	0	0	0	0	0	0	0	0	0	0	0	0	0	0	0	0	0	0	0	0
Fucus	0	0	0	5.8578e-05	0	0	0	0	0	0	0	0	0	0	0	0	0	0	4.21088e-05	0	0	0	0	0	0	0	0	0	0	0	0	0	0	0	0	0.000227035	0	0	0	0	0	0	0	0	0	0	0	0	0
Rickettsiella	4.83762e-05	0	0	5.8578e-05	3.26004e-05	0	0	0	2.39705e-05	3.12515e-05	0	0.000140117	0.000157023	0	0	5.09437e-05	4.95479e-05	5.06098e-05	4.21088e-05	5.37634e-05	4.05674e-05	0	0	0	0	4.21532e-05	8.26332e-05	0	5.33077e-05	4.85337e-05	0	5.62303e-05	0	0	7.52921e-05	0	7.6206e-05	0.000107531	5.51195e-05	0	0	0	0	0	0	0	0	0	0
Frigoribacterium	4.83762e-05	0	0	0	3.26004e-05	3.1507e-05	0	0	0	0	0	0.000294245	0.000188427	0	0	0	0.000173418	0	0.00033687	0.000125448	2.70449e-05	0.000154575	0	0	0	0	0	0	3.55385e-05	0	0	0	0	0	3.01169e-05	0	0	3.58436e-05	6.61434e-05	3.0596e-05	0	0	0	0	0	0	0	5.65771e-05	0
Procabacteriaceae_Group	0	0	5.49919e-05	0	0	0	0	0	0	0	0	0	6.28091e-05	0	0	0	0	0	0	5.37634e-05	0	0	0	0	0	0	4.13166e-05	0	0	0	0	5.62303e-05	0	0	0	0	0	0	2.20478e-05	0	0	0	0	0	0	0	0	0	0
Brenneria	0	0	0	0	0	0	0	0	0	0	0	0	0	0	0	0	0	0	0	0	0	0	0	0	0	0	0	0	0	0	0	0	0	0	0	0	0	0	0	0	0	0	0	0	0	0	0	0	0
Arcobacter	8.0627e-05	0	0	4.39335e-05	0	7.87674e-05	0	0	0	0.000343766	6.18888e-05	0.000140117	0.000188427	0	0	5.09437e-05	0	0	0	0	0	0.000206101	0	0	0	0	0	0	0	0	4.99201e-05	0	0.000195743	0	0	0.000181628	0	0.000179218	3.30717e-05	0	0.000354603	0	0	0	0.000417954	0.000701492	7.76398e-05	0	8.12645e-05
Chlorarachniophyceae_Group	0	0	0	0	0	0	0	0	0	0	0	0	0	0	0	0	0	0	0	0	0	0	0	0	0	0	0	0	0	0	0	3.74869e-05	0	0	0	0	0	0	4.40956e-05	0	0	2.01753e-05	0	0	0	0	0	0	0
Alicyclobacillus	6.45016e-05	0	0	0	0	0	0	0	0	4.68772e-05	0	8.40701e-05	0	0	2.90381e-05	0	4.95479e-05	0	0.000105272	0.000143369	0.000135225	0.00010305	0.00019526	7.14728e-05	0	0	2.75444e-05	0	5.33077e-05	7.28005e-05	0	7.49738e-05	0	0	9.03506e-05	0	0	8.96089e-05	5.51195e-05	0	0	0	0	0	0	0	0	2.82885e-05	0
Thermobaculum	0	0.00010755	8.24878e-05	0	0	3.1507e-05	0.000141976	0	0	0	0	4.20351e-05	0	0	0	0	0	0	8.42176e-05	8.96057e-05	0	0	0	9.52971e-05	0	0.000140511	4.13166e-05	0	7.1077e-05	0	0	0	0	0	0	0	0	3.58436e-05	3.30717e-05	0	0	0	0	0	0	0	0	0	0
Ammoniphilus	6.45016e-05	0	0	0	0	0	8.11293e-05	0	0	0	0	0	0	0	0	0	7.43218e-05	0	0	3.58423e-05	0	0	0	4.76485e-05	0	0	0	0	0	0	0	0	0	3.7669e-05	0	0	0	3.58436e-05	0	0	0	0	0	0	0	0	0	0	0
Oceanococcus	0	0	0	0	0	0	0	0	0	0	0	0.000140117	4.71069e-05	0	0	0	0	0	4.21088e-05	0	0	0	0	7.14728e-05	0	0	0	0	5.33077e-05	0	0	3.74869e-05	0	0	0	6.81106e-05	0	0	0	0	0	0	0	0	0	0	0	0	0
Pseudofulvimonas	0	0	8.24878e-05	0	0	0	0	0.000151979	0	0	0	0	0.000157023	0	0	0	0	0	0.000105272	7.16846e-05	2.70449e-05	5.15251e-05	0	0	0	5.62042e-05	0.000137722	0	0	0	9.98403e-05	0.000187434	0	0	0.000180701	0.000136221	0	0	5.51195e-05	0	0	0	0	0	5.06611e-05	0	5.17598e-05	2.82885e-05	4.06322e-05
Pilimelia	6.45016e-05	3.07286e-05	8.24878e-05	0	0	0	4.05647e-05	0	0	0	0	2.80234e-05	0	0	0	0	4.95479e-05	0	0.000168435	0.000143369	2.70449e-05	0	0	0	0	5.62042e-05	2.75444e-05	0	0.000177692	0	0	0.000168691	0	0	0.00019576	0	0	5.37654e-05	0.000121263	0	0	0	0	0	0	0	0	0	0
Aphanothece	0	0	0	0	0	0	0	0	0	0	0	0	0.000157023	0	0	0	0	0	0	0	0	0	0	0	0	0	0	0	0	0	0	0	0	0	0	0	0	0	0	0	0	0	0	0	0	0	0	0	0
Gleocapsa	0	0	0	0	0	0	0	0	0	0	0	0	0.000157023	0	0	0	0	0	0	0	0	0	0	0	0	0	0	0	0	0	0	0	0	0	3.01169e-05	0	0	0	0	0	0	0	0	0	0	0	0	0	0
Pseudorhodobacter	0	0	0	0	0	0	0	0	0	0	0	0	3.14046e-05	0	0	0	4.95479e-05	0	0	3.58423e-05	0	0	0	0	0	2.81021e-05	0	0	7.1077e-05	0	0	0	0	0	3.01169e-05	0	0	7.16872e-05	2.20478e-05	0	0.000250308	0	0	0	2.53306e-05	0	0.00015528	5.65771e-05	2.70882e-05
Ureibacillus	0	0	0	0	0	0	0	0	0	0	0	0	0	0	0	0	4.95479e-05	0	0	0	0	0	0	0	0	0	0	0	0	0	0	0	0	0	0	0	0	0	0	0	0	0	0	0	0	0	0	0	0
Methanolobus	0	0	0	0	0	0	0	0	0	0	0	0	0	0	0	0.000509437	0	0	0	0	0	0	0	0	0	0	0	0.000624649	0	0	0	0.000224921	0.000404536	0	9.03506e-05	0	0	0	0	0	0	0	0	0	0	0	0	0	0
Skermanella	0	0	0	0	0	0	0	0	0	0	0	0	0	0	0	0	0	0	0	0	4.05674e-05	0	4.8815e-05	0	0	0	0	0	0	0	4.99201e-05	0	0.000130495	0	0	0	0	0	0	0	0	0	0	0	0	0	0	0	0
Sulfurovum	0	0	0	2.9289e-05	0	0.000976716	0	0	0	6.25029e-05	0	2.80234e-05	0	0	0	0	0	0	0	0	0	0	0	0	0.000105768	0	0	0	5.33077e-05	0	0.000648962	0	0	0	0	0.000158925	0	0	6.61434e-05	0	0	0	0	0	0	0	0	0	4.06322e-05
Nostocaceae_Group	0	0	0	0	0	0	0	0	0	0	0	0	0	0	0	0	0	0	0	3.58423e-05	0	0	0	0	0	0	0	0	0	0	0	0	0	0	0	0	0	0	0	3.0596e-05	8.34359e-05	0	0	0	0	0	0	0	0
Salinibacter	0	0	0	2.9289e-05	0	0	0	0	0	0	0	0	0	0	0	0	0	0	0	0	0	0	0	0	2.88459e-05	0	0	0	0	2.42668e-05	0	0	0	0	0	0	0	0	0	0	0	0	0	0	0	0	2.58799e-05	0	0
Oscillospira	0	0	0	0	0	0	0	0	2.39705e-05	0	0	0	0	0	2.90381e-05	0	0	0	8.42176e-05	3.58423e-05	0	0	0	0	0	0	0	0	0	0	0	9.37172e-05	0	0	6.02337e-05	0	0	0	0	3.0596e-05	0	0	0	0	0.000354628	0	0.000750518	0.000749646	0
Sediminitomix	0	0	0	0	0	0	0	0	0	0	0	0	0	0	0	0	0	0	0	0	0	0	0	0	0	0	0	0	0	0	0	0	0	0	0	0	0	0	0	0	0	0	0	0	0	0	0	0	0
Rikenellaceae_Group	0	0	0	0	0	0	0	0	0	0	0	8.40701e-05	0.000109916	0.000112918	0	0	0	0	0	5.37634e-05	0	0	0	0	0	0	0	0	0.000106615	4.85337e-05	0	9.37172e-05	0	0	0	0	5.0804e-05	0	0	0	0	0	0	0	0.000113988	9.35322e-05	3.88199e-05	0.000113154	2.70882e-05
Thermomicrobium	0	0.000122914	0	0.000190379	8.15009e-05	0.000126028	0.000162259	4.34226e-05	2.39705e-05	9.37544e-05	0	9.80818e-05	6.28091e-05	0	0	0	0	0	0	5.37634e-05	0	0	0	0	0	0.00012646	4.13166e-05	0	0	0	0	3.74869e-05	0	3.7669e-05	3.01169e-05	0	0	3.58436e-05	2.20478e-05	0	0	0	0	0	0	0	0	0	0
Candidatus_Lariskella	0	9.21857e-05	8.24878e-05	0	0	3.1507e-05	0	0	0	0	0	2.80234e-05	0	3.22622e-05	0	5.09437e-05	0	5.06098e-05	0.000105272	0	0	0.000257626	0	4.76485e-05	0	0.00012646	0	0	0	0	0	0	0	0	0	0	0	0	2.20478e-05	0	0	0	4.59971e-05	0	0	0	0	0	0
Holospora	0	0	0	2.9289e-05	0	7.87674e-05	0	4.34226e-05	0	6.25029e-05	0.0002785	0.000126105	6.28091e-05	0	0	7.64156e-05	0	0	0	0	0	0	0	0	0	0	0	0	0	0	7.48802e-05	0	0	0	0	0.000136221	0	0	0	0	0	3.0263e-05	0	0	0	0.000187064	2.58799e-05	0	0
Isosphaeraceae_Group	0	0	0	2.9289e-05	0	6.3014e-05	0	0	0	0	0	0	4.71069e-05	3.22622e-05	0	0	0	5.06098e-05	4.21088e-05	0	0	0	0	0	1.92306e-05	0	0	0	0	0	0	0	0	0	9.03506e-05	6.81106e-05	0	0	0	3.0596e-05	0	0	0	0	0.000113988	0	2.58799e-05	0	0
Leisingera	0	4.60929e-05	0	0	0	0	0	0	0	0	0	0	3.14046e-05	8.06556e-05	0	0	0	0	0.000105272	0	0	0	0	0	1.92306e-05	7.02553e-05	0	0	0.000159923	0	0	0	0	0	4.51753e-05	0	0	0	0	0	0	3.0263e-05	0	0	5.06611e-05	0	5.17598e-05	0	0
Nordella	0	0	5.49919e-05	0	0	0	0	0	0	0	0	2.80234e-05	3.14046e-05	0	2.90381e-05	0	0	0.00010122	4.21088e-05	5.37634e-05	2.70449e-05	0	0	4.76485e-05	0	2.81021e-05	0	0	3.55385e-05	0	0	3.74869e-05	0	0	0.000105409	6.81106e-05	0	5.37654e-05	5.51195e-05	0	0	0	0	0	0	0	0	0	0
Acetobacteraceae_Group	8.0627e-05	0	0	0	0	0	0	0	0	0	6.18888e-05	0	0	4.83933e-05	4.35572e-05	0	0	7.59148e-05	0.000126326	7.16846e-05	0	0	0	4.76485e-05	0	5.62042e-05	0	0	0	2.42668e-05	4.99201e-05	3.74869e-05	3.91486e-05	3.7669e-05	9.03506e-05	0	0	0	3.30717e-05	0	8.34359e-05	0	9.19942e-05	0	0	0	5.17598e-05	4.24328e-05	2.70882e-05
Plantago	0	0	0	2.9289e-05	0	0	6.0847e-05	4.34226e-05	0	0	6.18888e-05	0	0	3.22622e-05	0	0	0	5.06098e-05	0	0	0	0	0	0	0	0	0	0	0	2.42668e-05	0	0	0	0	0	0	0	0	5.51195e-05	0	0	0	0	0	6.33264e-05	9.35322e-05	6.46998e-05	0	0
Diaphorobacter	0	0	0	0.000615069	0	0	0	4.34226e-05	0	0	0	0	0	0	0	0	0	0	0	0	0	0	0	0	0	9.83574e-05	0	0	0	0	0	0	0	0	9.03506e-05	0	0	0	0	0	0	0	0	0	0	0	5.17598e-05	7.07214e-05	0
Cyanidioschyzon	0	0	5.49919e-05	5.8578e-05	0	0	4.05647e-05	0	2.39705e-05	0	0	0	0	0	0	0	0	0	0	0	0.000121702	0	0	0	0	0	0	0	0	4.85337e-05	4.99201e-05	0	0	0	3.01169e-05	6.81106e-05	0	0	0	0	4.17179e-05	0	0	0	0	0	0	0	5.41763e-05
Thermobispora	6.45016e-05	0	0.000164976	0	0	6.3014e-05	4.05647e-05	0	0	0	0	0.000196164	0.000109916	0	0	0	7.43218e-05	0	8.42176e-05	0.000125448	4.05674e-05	0.00010305	0	0	0	5.62042e-05	2.75444e-05	4.16432e-05	0.000142154	2.42668e-05	0	9.37172e-05	0	0	0.000105409	0	0	0.000179218	0.000121263	0	0	0	0	0	0	0	0	5.65771e-05	0
Korarchaeotaceae_Group	0	0	0	0	0	0	0	0	2.39705e-05	0	0	0	0	0	0	0	0	0	0	0	0	0	0	0	0	0	0	0	0	0	0.000224641	0	0	0	0	6.81106e-05	0	0	2.20478e-05	0	0	0	0	0	3.79958e-05	0	3.88199e-05	2.82885e-05	0
AK1AB1_02E_Group	0	0	0	0	0	0	0	0	0	0	0	0	3.14046e-05	0	0	0	0	0	4.21088e-05	0.00016129	2.70449e-05	0	0	0	0	0	0	0	0	3.64003e-05	0	0	0	0	0	0	0	0	0	0	0	0	0	0	0	0	0	0	0
Phyllobacterium	6.45016e-05	3.07286e-05	0	0	0	0	0	0.000130268	2.39705e-05	0	0	5.60467e-05	0	3.22622e-05	0	0	0	0	0	7.16846e-05	0	0	0	0	0	4.21532e-05	2.75444e-05	0	0.000159923	2.42668e-05	0	0.000243665	0	0	7.52921e-05	9.08141e-05	5.0804e-05	0.000125453	0.00045198	0	0	6.0526e-05	0	2.872e-05	7.59917e-05	0	9.05797e-05	0.000113154	5.41763e-05
Agromyces	4.83762e-05	0	0	2.9289e-05	0	0	0.000121694	0	0	0	0	0.000126105	0	0	0	0	0	0	4.21088e-05	0	0	0	0	4.76485e-05	0	0	0	0	3.55385e-05	0	0	5.62303e-05	0	0	0.000120467	0	0	0	2.20478e-05	0	0	0	0	0	0	0	7.76398e-05	0	0
Candidatus_Cyrtobacter	0	0	0	2.9289e-05	0	0	0	0	0	0	0	0	0	0	0	0	0	0	4.21088e-05	0	0	0	0	0	8.65376e-05	0	0	0	0	0	7.48802e-05	0	3.91486e-05	0	0	0	0	0	0	0	0	0	0	0	0	0	0	0	0
Candidatus_Alysiosphaera	0	3.07286e-05	0	0	0	3.1507e-05	6.0847e-05	6.51339e-05	4.79409e-05	0	0	2.80234e-05	0	0	2.90381e-05	0.000101887	4.95479e-05	7.59148e-05	4.21088e-05	5.37634e-05	4.05674e-05	0	4.8815e-05	0	0	7.02553e-05	0	0	3.55385e-05	7.28005e-05	0.00017472	5.62303e-05	6.52477e-05	0.000150676	3.01169e-05	4.54071e-05	5.0804e-05	5.37654e-05	4.40956e-05	0	8.34359e-05	0	4.59971e-05	0	3.79958e-05	0	5.17598e-05	0.000141443	8.12645e-05
Petrobacter	0	0	0	0	0	0	0	0	0	0	0	0	0	0	0	0	0	0	0	0	0	0	0	0	0	0	0	0	0	0	0	0	0	0	0	0	0	0	0	0	0	0	0	0	0	0	0	0	0
Dichelobacter	0	0	0	0	0	0	0	0	0	0	0	0	0	0	0	0	0	0	0	0	0	0	0	0	0	0	0	6.24649e-05	0	0	0	3.74869e-05	0	0	0	0	0	0	0	0	0	0	0	0	0	0	0	0	0
Erysipelothrix	0	0	5.49919e-05	2.9289e-05	0	0	0	0	0	0	0	0	0	0	0	0	0	0	4.21088e-05	0	0	0	0	0	0	0	0	0	3.55385e-05	0	0	0	0	3.7669e-05	4.51753e-05	0.000204332	0	0	0	0	0	0	0	0	0	0	0	0	0
Tepidimonas	0	0	0	0	0	0	0	0	0	0	0	0	0	0.000112918	0	0	0	0	0	0	0	5.15251e-05	0	0	0	0	0	0	0	0	4.99201e-05	0	0	0	0	6.81106e-05	0	0	0	0	0.000187731	0	0	0	0	0	0	0	0
Clavibacter	0	0	0	0	0	3.1507e-05	4.05647e-05	0	0	0	0	0.000224187	0	0	0	0	0	0	0	3.58423e-05	0	0	0	0	0	7.02553e-05	0	0	0	0	0	9.37172e-05	0	0	0.000135526	0	0	0.000107531	0	0	4.17179e-05	0	0	0	3.79958e-05	0	0	0.000155587	0
Plesiomonas	0	0	0	2.9289e-05	0.000146702	0	0	0	4.79409e-05	0	0	0	0	9.67867e-05	0	0	0	0	0	0	0	0	0	0	0	0	0	0	0	0	0	0	2.60991e-05	0	0	4.54071e-05	0	0	0	3.0596e-05	0	4.03506e-05	0	0	8.8657e-05	0	0	0	0
Desulfocapsa	0	0	0	0	0	0.000173288	0	0	0	0	0	0	0	0	0	0	0	0	0	8.96057e-05	0	0	0	0	0	0	0	4.16432e-05	0	0	0	0	0	0	0.000361402	0	0	3.58436e-05	0	0	0	0	0	0	3.79958e-05	0	0	0	0
Muriicola	3.22508e-05	0	8.24878e-05	0	0	0	4.05647e-05	4.34226e-05	0	0	0	5.60467e-05	4.71069e-05	0	4.35572e-05	0	0	0	0.000105272	3.58423e-05	6.76123e-05	0	0	0.000119121	2.88459e-05	0.00012646	0.000110178	0	8.88462e-05	7.28005e-05	7.48802e-05	5.62303e-05	2.60991e-05	0	7.52921e-05	0.000113518	0	0.000125453	7.71673e-05	0	0	0	0	0	0	0.000140298	0	0	2.70882e-05
Agarivorans	0	0	0	0	0	0	0	0	0	0	6.18888e-05	0	0	0	0	0	0	0	0	0	0	0	0	0	0	0	0	0	0	0	0	0	0	0	0	0	0	0	0	0	0	0	0	4.30799e-05	0	0	0	0	0
Macellibacteroides	6.45016e-05	0	0	0	0	6.3014e-05	0	0	0	0	0	4.20351e-05	9.42137e-05	0	0	0	0	0	4.21088e-05	0	0	0	0	0	0	0	0	0	0.000159923	0	0	3.74869e-05	0	0	0	4.54071e-05	0	0	0	0	0	0	0	0	0	0	0	0	0
Desulfobacula	0	0	0	0	0	0.000204795	0	0	0	0	0	0	0	0	0	7.64156e-05	0	0	0	0	0	0	0	9.52971e-05	0	2.81021e-05	0	0	0	0	0	0	0	0	0.000225876	6.81106e-05	0	0	0	0	0	0	0	0	0	0	0	0	0
Victivallaceae_Group	0	0	0	0	0	0	0	0	0	0	0	0	0	0	0	0	0	0.000227744	0	0	0	5.15251e-05	0	0	0	0	0	0	0	0	0	0	0	0	0	0	0.000101608	0	0	0	0	0	0	0	2.53306e-05	0	0	0	0
Antarctobacter	0	0	0	0	0	0	4.05647e-05	4.34226e-05	0	3.12515e-05	0	0	0	0	0	0	0	0	0	8.96057e-05	0	0	0	0	1.92306e-05	0	0	0	7.1077e-05	0	0	0	0	0	0	0	0	0	0	0	0	2.01753e-05	0	0	2.53306e-05	0	3.88199e-05	5.65771e-05	4.06322e-05
Magnetovibrio	0	6.14571e-05	0	0	3.26004e-05	0	6.0847e-05	0	0	0	6.18888e-05	0	0	0	0	0.000178303	0	0	0	0	8.11348e-05	0	0	4.76485e-05	0	0	0	0.000104108	0	0	0	7.49738e-05	0.000143545	0	6.02337e-05	9.08141e-05	0	0	0	0	0	0	0	0	0	0	0	0	0
Crenothrix	0	0	0	5.8578e-05	0	7.87674e-05	0	4.34226e-05	0	6.25029e-05	0	0	0	0	0	0	0	0	0	0	0	0	0	0	0	0	0	0	0	4.85337e-05	0	0	0	0	6.02337e-05	4.54071e-05	0	0	9.92151e-05	0	4.17179e-05	0	0	0	0	0	0	0	0
Bradyrhizobiaceae_Group	8.0627e-05	0	0	2.9289e-05	0	0	0	6.51339e-05	0	0	0	5.60467e-05	3.14046e-05	0	2.90381e-05	0	0	0	4.21088e-05	5.37634e-05	0	0	0	0	6.7307e-05	0	9.64055e-05	0	0.000195462	0	0	0.000112461	2.60991e-05	0	6.02337e-05	4.54071e-05	0	0.000107531	8.81912e-05	0	0	0	0	0	0	0	0	0	5.41763e-05
Intrasporangiaceae_Group	0	0	0	0	0	0	0	0	0	0	0	2.80234e-05	3.14046e-05	0	0	0	4.95479e-05	0	0	0	0	5.15251e-05	0	0	0	4.21532e-05	0	0	3.55385e-05	0	0	0	0	0	0	0	0	0	0	0	0	0	0	0	0	0	0	4.24328e-05	0
Kineococcus	6.45016e-05	0	5.49919e-05	0	0	0	0	0	0	0	0	7.00584e-05	0	0	0	0	0	0	0.000105272	7.16846e-05	0	0	0	0	1.92306e-05	5.62042e-05	0	0	8.88462e-05	2.42668e-05	0	7.49738e-05	0	0	0	0	0	5.37654e-05	0.000143311	0	0	0	0	0	0	0	0	0	0
Methyloceanibacter	0	0	5.49919e-05	0	0.000146702	0	0	0	0	0	0	5.60467e-05	0	3.22622e-05	0	0	0	0	0.000105272	3.58423e-05	0	0	0	0	0	0	0	0	5.33077e-05	0	0.00017472	0	5.21982e-05	3.7669e-05	0	0.000227035	0	3.58436e-05	2.20478e-05	0	0	0	0	0	0	0	0	0	0
Propionibacterium	0.000145129	9.21857e-05	0	0.000190379	0	3.1507e-05	0	0	0	0	0	0.000112093	4.71069e-05	0	0	0	0	0	6.31632e-05	0.000197133	6.76123e-05	0.000180338	0	0	0	0	0	4.16432e-05	8.88462e-05	2.42668e-05	0	3.74869e-05	0	0	4.51753e-05	0	0	0.00019714	2.20478e-05	0	0	0	0	0	0	9.35322e-05	0	0	0
Candidatus_Anammoximicrobium	0	0	0	0	0	0	0	0	0	0	0	4.20351e-05	0	0	0	0	0	0	0	0	0	0	0	0	0	0	0	0	5.33077e-05	0	0	3.74869e-05	0	0	3.01169e-05	0	0	3.58436e-05	0	0	0	0	0	0	0	0	0	0	0
Thioalkalivibrio	0	0	0	0	0	0	0	0	0	0	0	0	0	0	0	5.09437e-05	4.95479e-05	0	0	0	2.70449e-05	0	0	0	0	2.81021e-05	0	0	8.88462e-05	2.42668e-05	0	0	0	0	9.03506e-05	0	0	0	0	0	0	0	0	0	0	0	0	0	0
ML110J_20	0	0	0	0	0	0	0	0	0	0	0	0	0	0	2.90381e-05	0	0	0	0	3.58423e-05	0	0	0	0	0	0	0	0	3.55385e-05	3.64003e-05	0	5.62303e-05	0	0	0.000135526	0	0	3.58436e-05	0	0	0	0	0	0	0	0	3.88199e-05	2.82885e-05	0
Desulfarculus	0	6.14571e-05	0	0	0	0	6.0847e-05	0	0	0	0	0	0	0	0	0	0	5.06098e-05	4.21088e-05	7.16846e-05	5.40899e-05	5.15251e-05	0	0	0	0.000154562	0	0	5.33077e-05	0	0	9.37172e-05	0	3.7669e-05	0.000301169	0	0	7.16872e-05	9.92151e-05	0	0	2.01753e-05	0	0	0	0	0	2.82885e-05	0
Sediminibacterium	0	0	0.000109984	5.8578e-05	0	0	0	0	0	0	0	5.60467e-05	0	0	0	5.09437e-05	4.95479e-05	0	4.21088e-05	0.000143369	0.000270449	0	9.763e-05	0.000214418	0	0	0	0	0	0	4.99201e-05	5.62303e-05	0	0	3.01169e-05	0	0	0	3.30717e-05	0	0	5.04383e-05	9.19942e-05	0	0	0	0	0	0
Rhodoligotrophos	0	6.14571e-05	0	0	0	0	0	0	0	0	0	0	0	0	0	0	0	0	0	0	0	0	0	0	0	7.02553e-05	0	0	0	2.42668e-05	0	5.62303e-05	0	5.65036e-05	0.000105409	9.08141e-05	0	3.58436e-05	0	0	0	0	0	0	0	0	0	0	0
Methylonatrum	0	0	0	0	0	0	0	0	0	0	0	0	0	0	0	0	0	0	0	0	0	7.72877e-05	0	0	0	0	0	0	0	0	0	0	0	0	0	0	0	0	0	0	0	0	0	5.74399e-05	0	0	0	0	0
[truncated: 982 more rows]
[truncated: 11 more columns]
